# Supplementary material
Source: PubMed Central journal article supplement (PMC3574212)
Supplement: NIHMS433888-supplement-1_si_001.pdf [file NIHMS433888-supplement-1_si_001.pdf]

# Supporting Information

## Identification and Characterization of Small Molecules as Potent and Specific EPAC2 Antagonists

Haijun Chen,<sup>†</sup> Tamara Tsalkova,<sup>†,‡</sup> Oleg G. Chepurny,<sup>§</sup> Fang C. Mei,<sup>†,‡</sup> George G. Holz,<sup>§,ξ</sup>  
Xiaodong Cheng,<sup>†,‡,\*</sup> and Jia Zhou<sup>†,\*</sup>

<sup>†</sup>Department of Pharmacology and Toxicology, <sup>‡</sup>Sealy Center for Structural Biology and Molecular  
Biophysics, University of Texas Medical Branch, Galveston, Texas 77555, United States

<sup>§</sup>Departments of Medicine and <sup>ξ</sup>Pharmacology, State University of New York (SUNY), Upstate Medical  
University, Syracuse, NY 13210, United States

### Table of Contents

Copies of <sup>1</sup>H and <sup>13</sup>C NMR spectra S2-S61

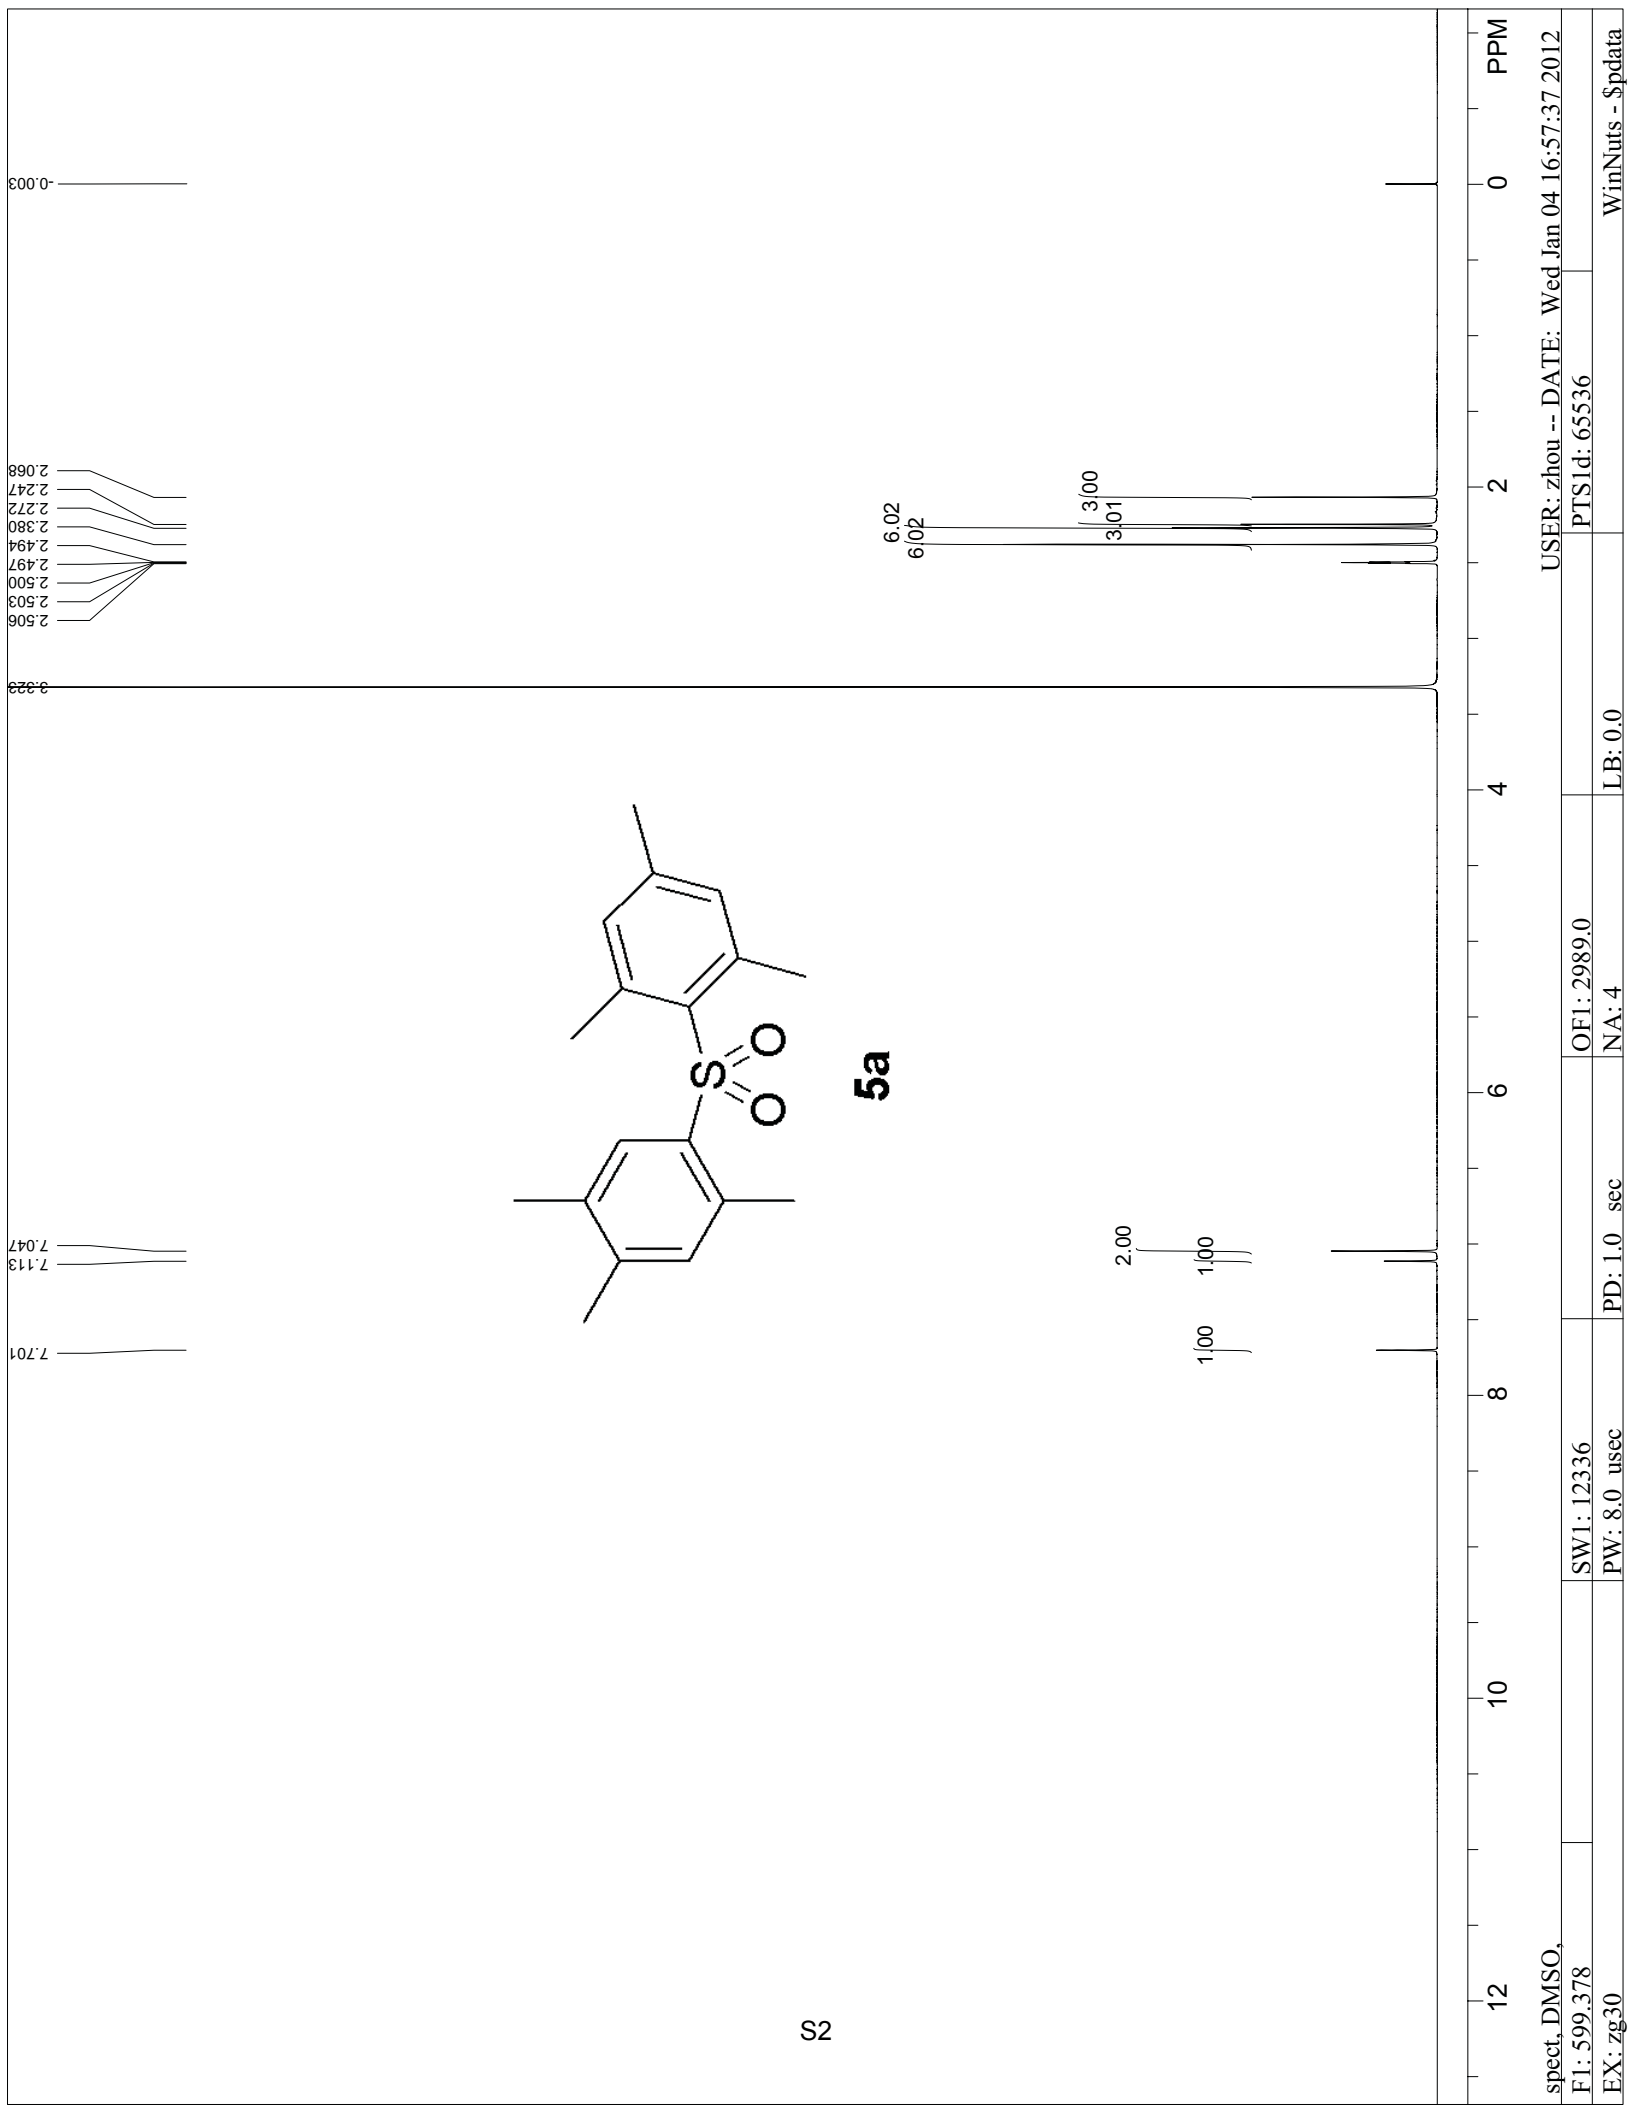

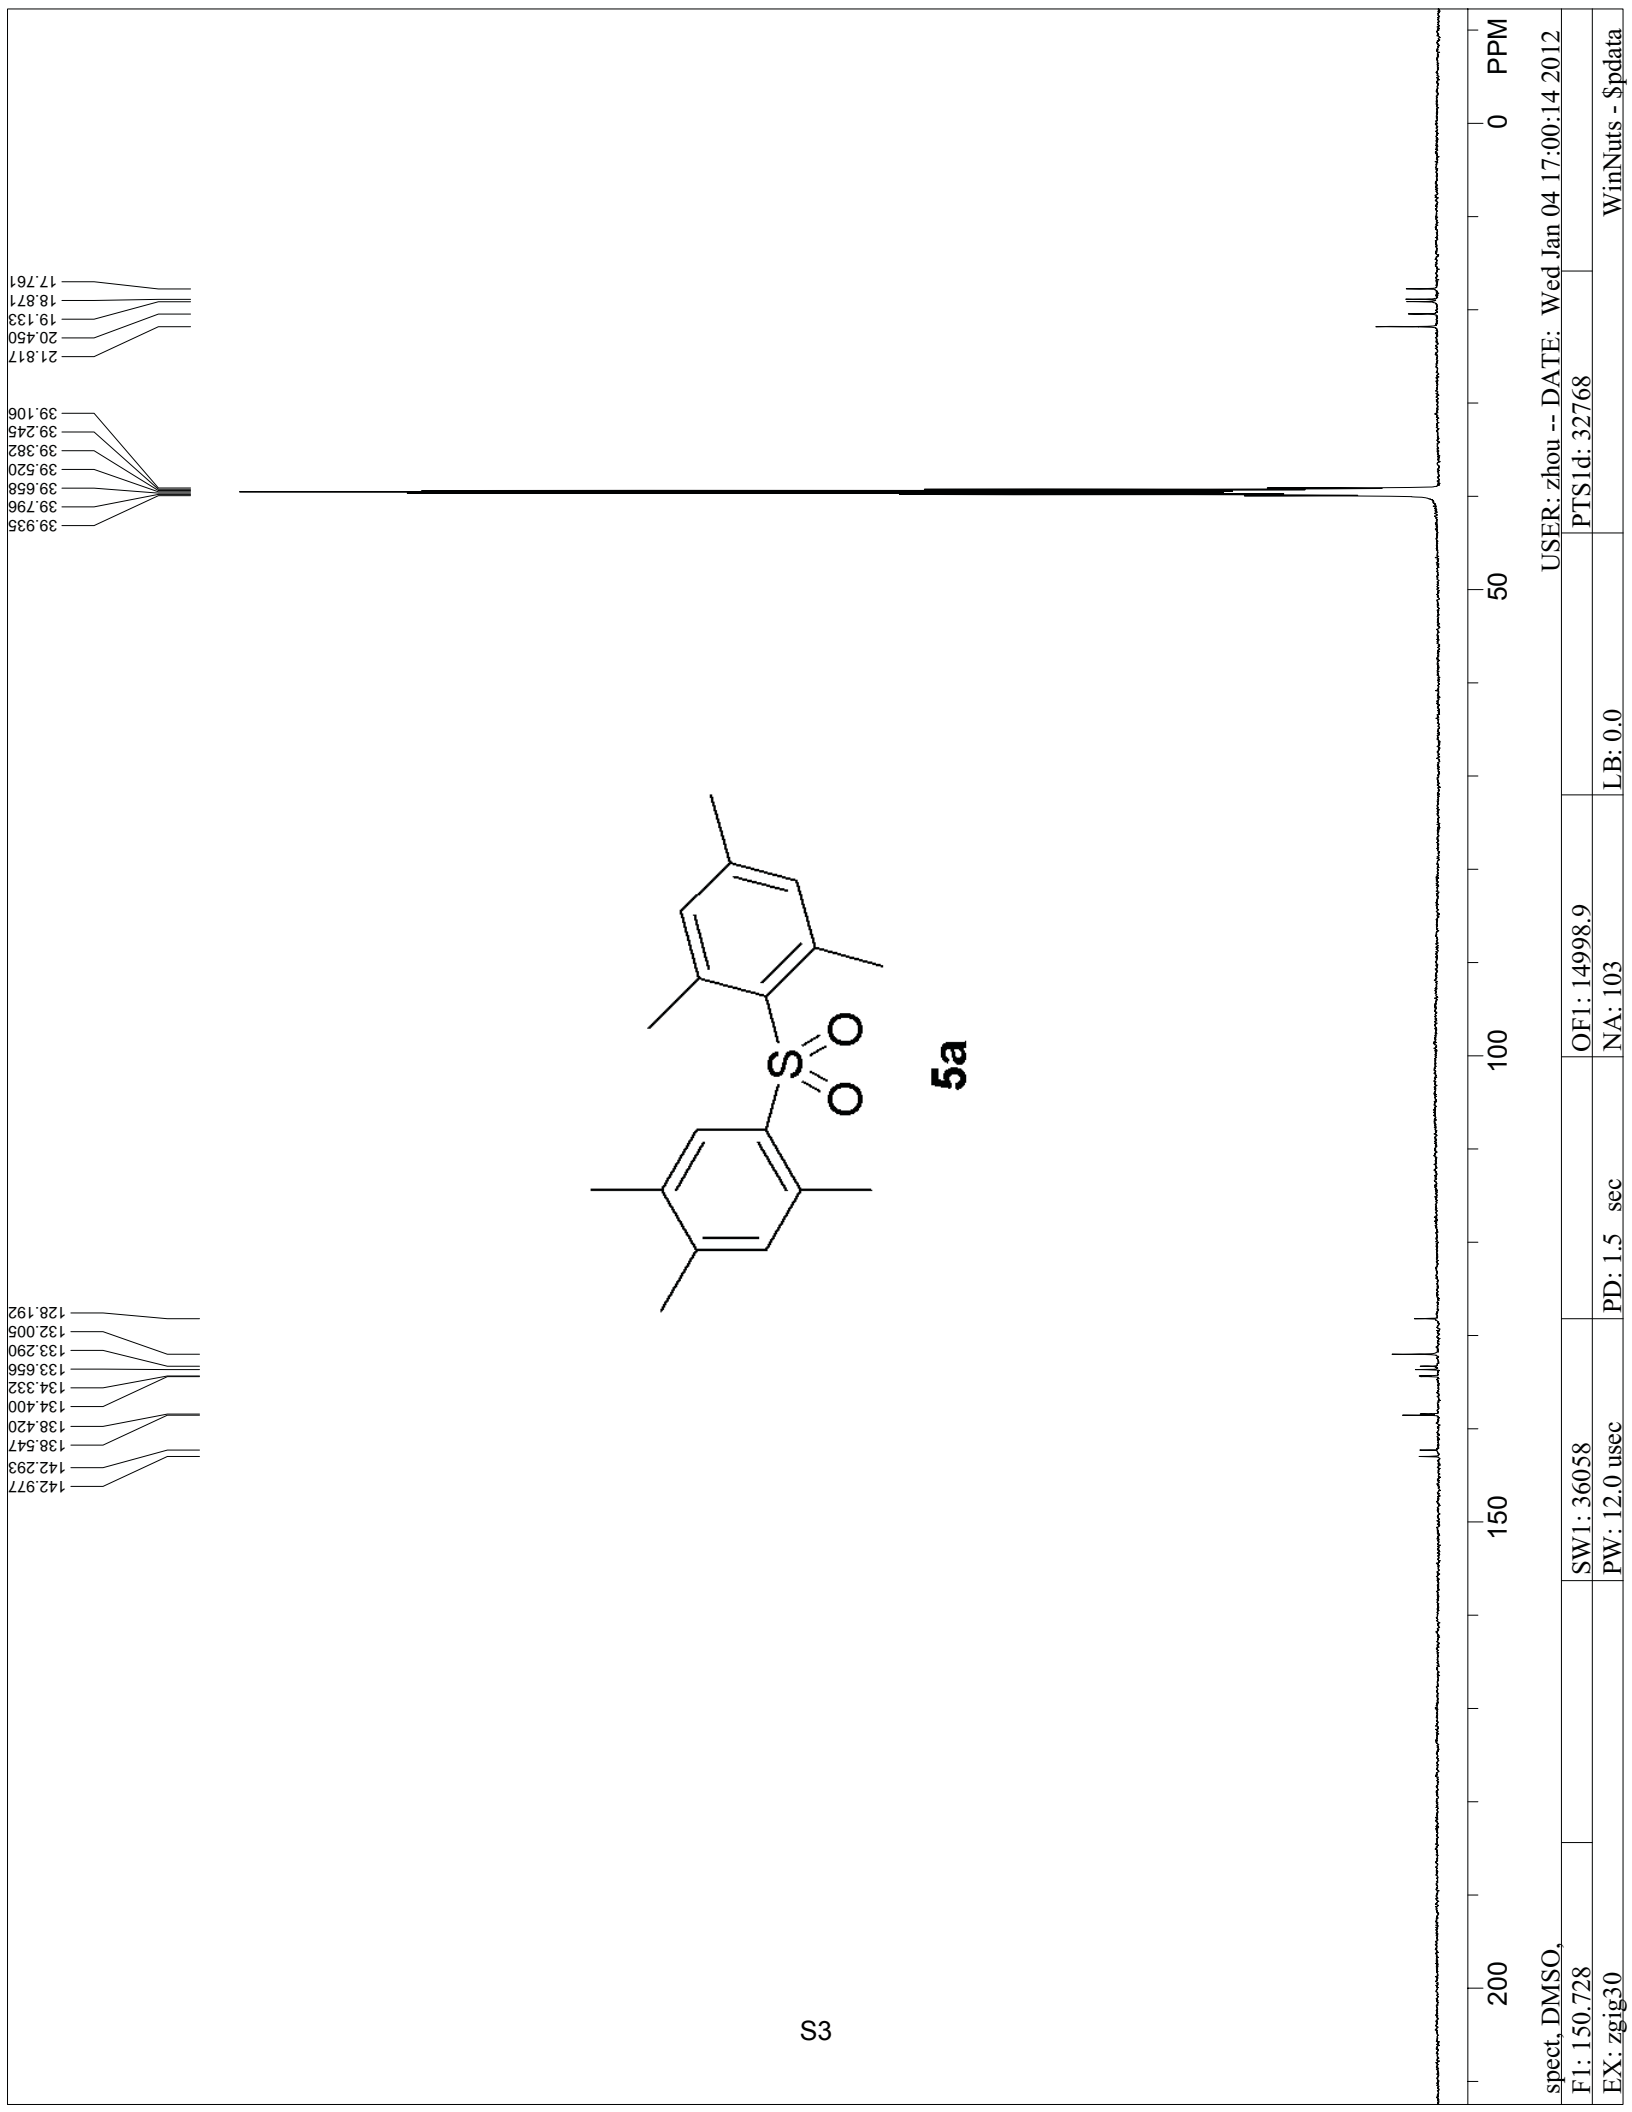

spect, DMSO, F1: 150.728 EX: zgig30 SW1: 36058 PW: 12.0 usec PD: 1.5 sec OF1: 14998.9 NA: 103 LB: 0.0 PTS1d: 32768 WinNuts - \$pdata

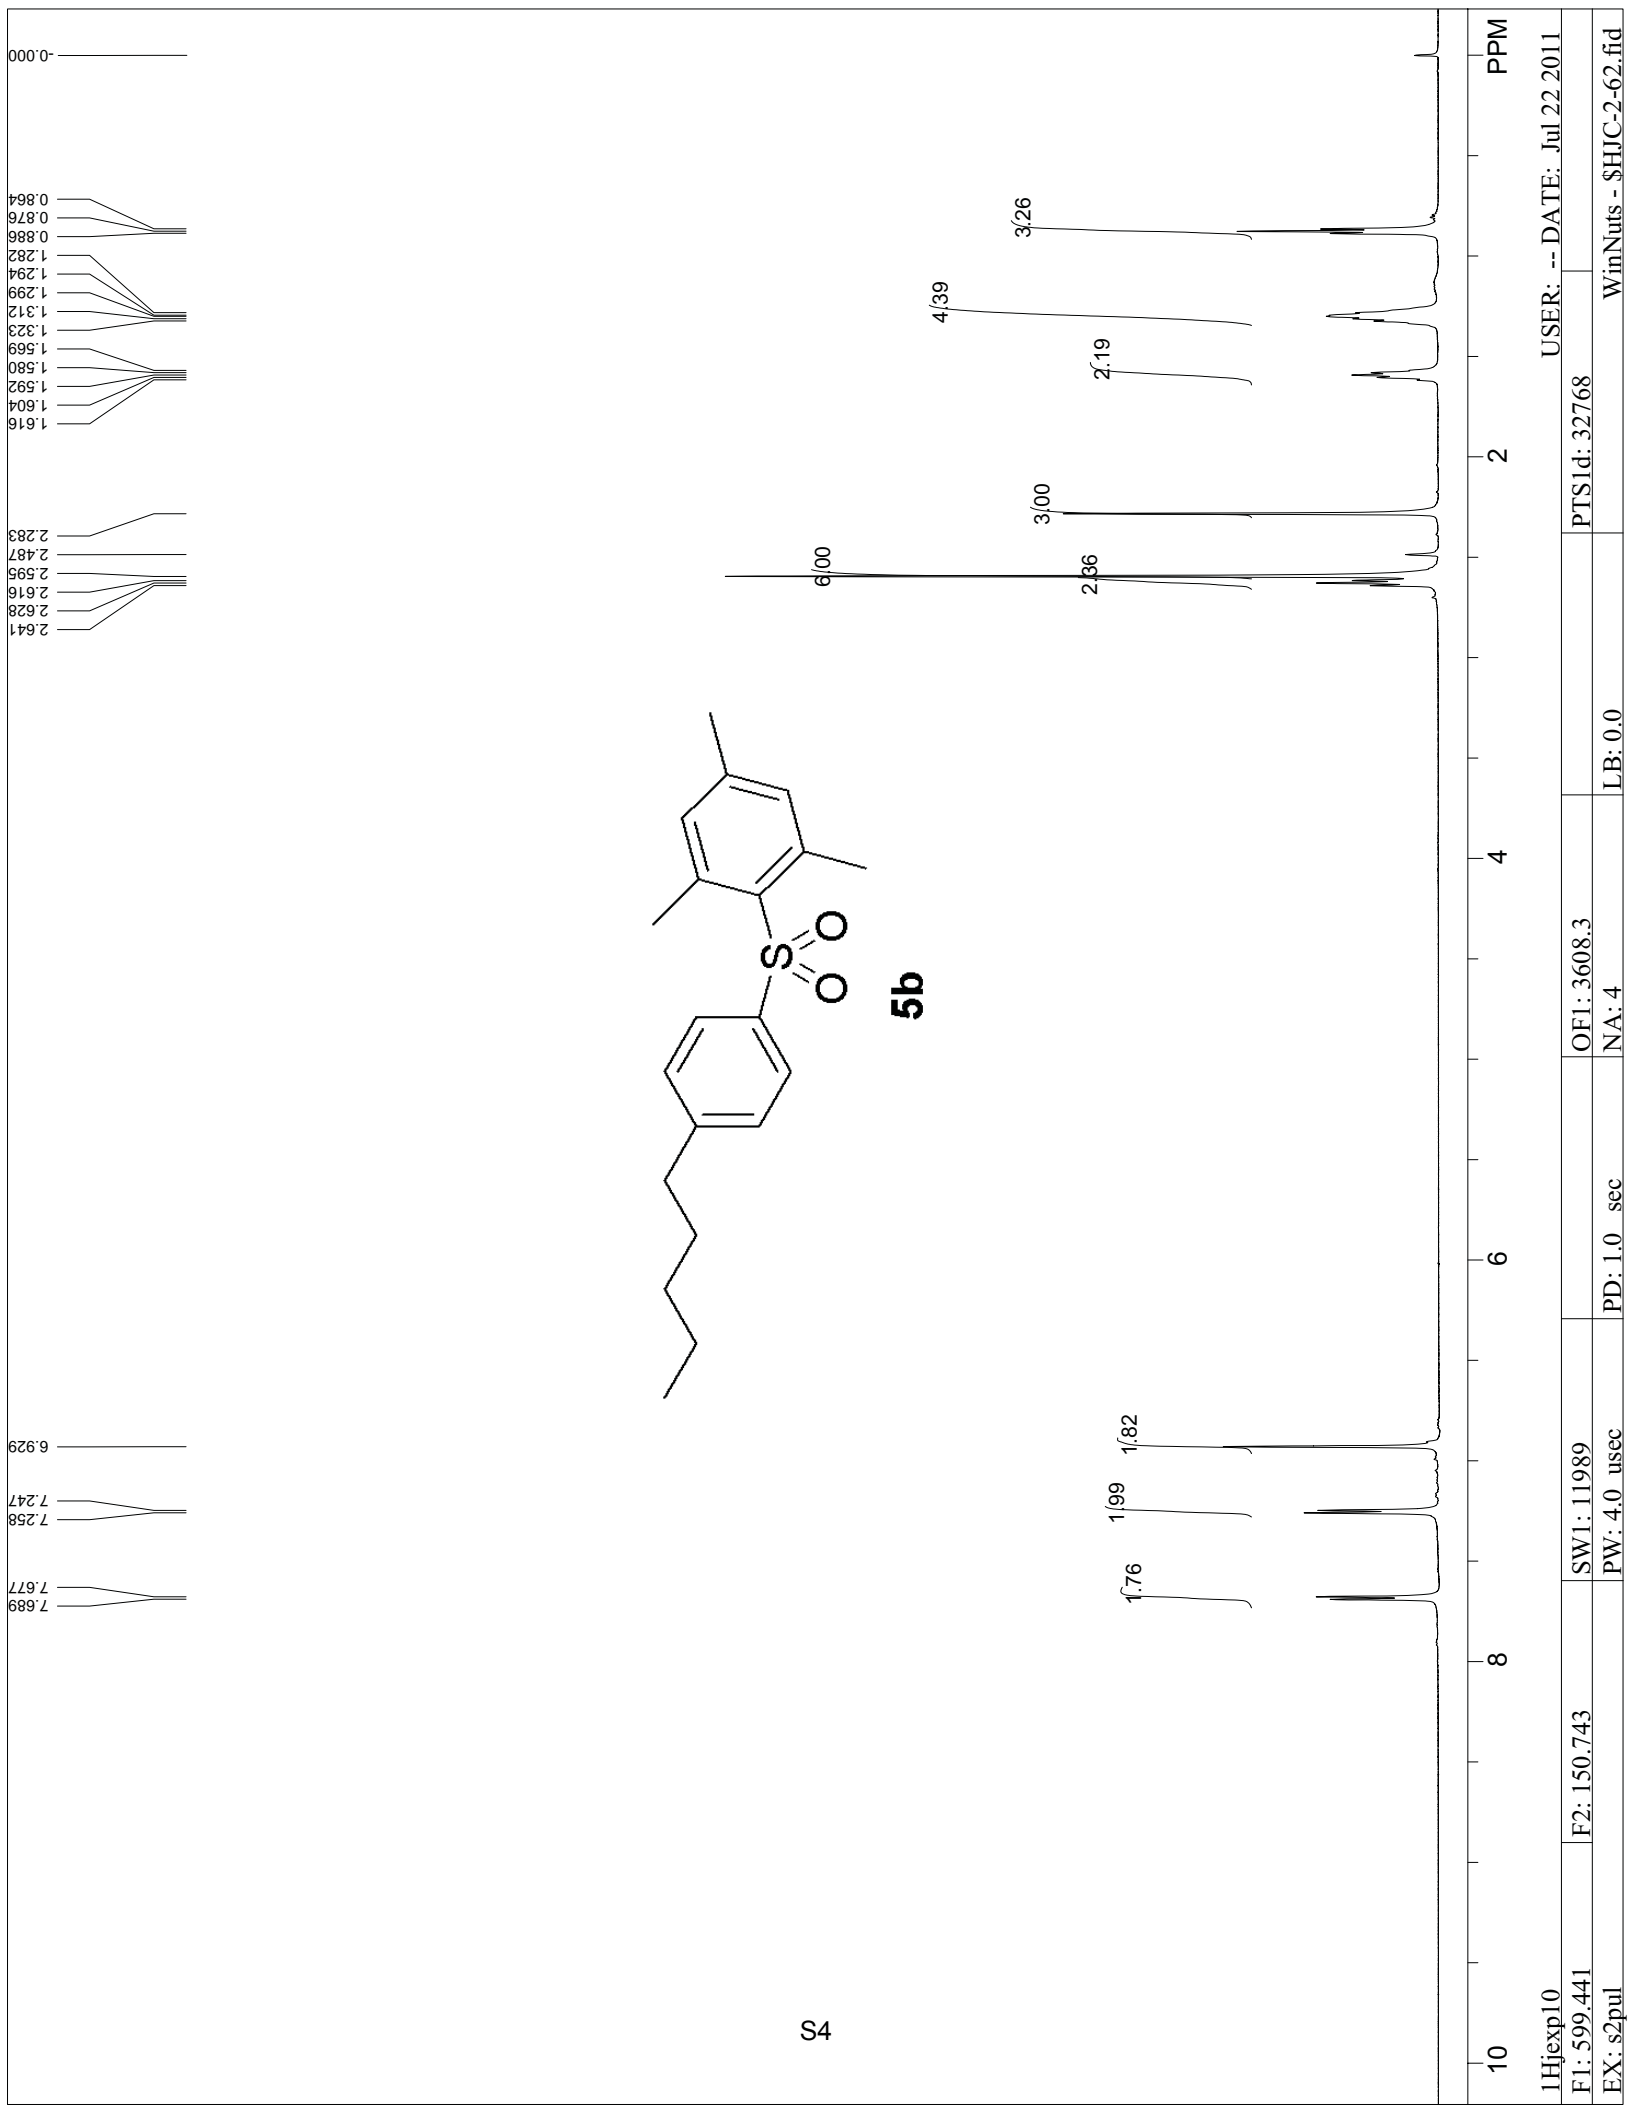

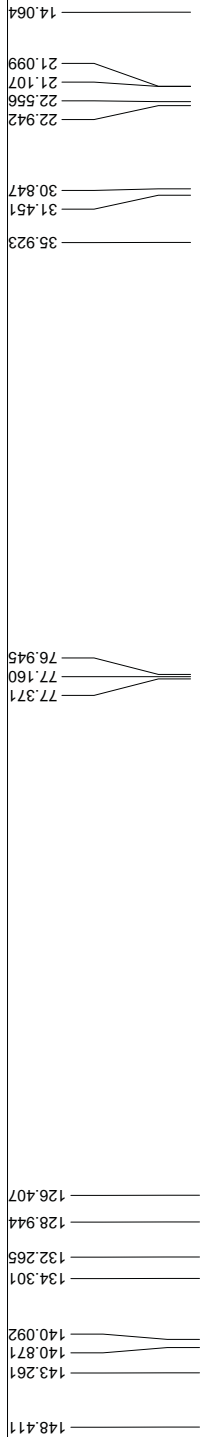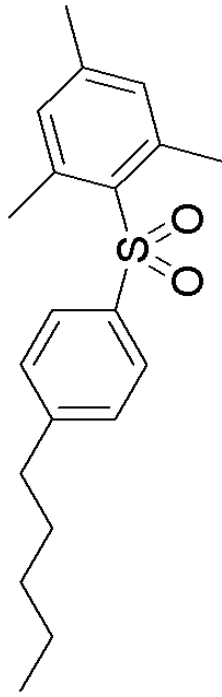

**5b**

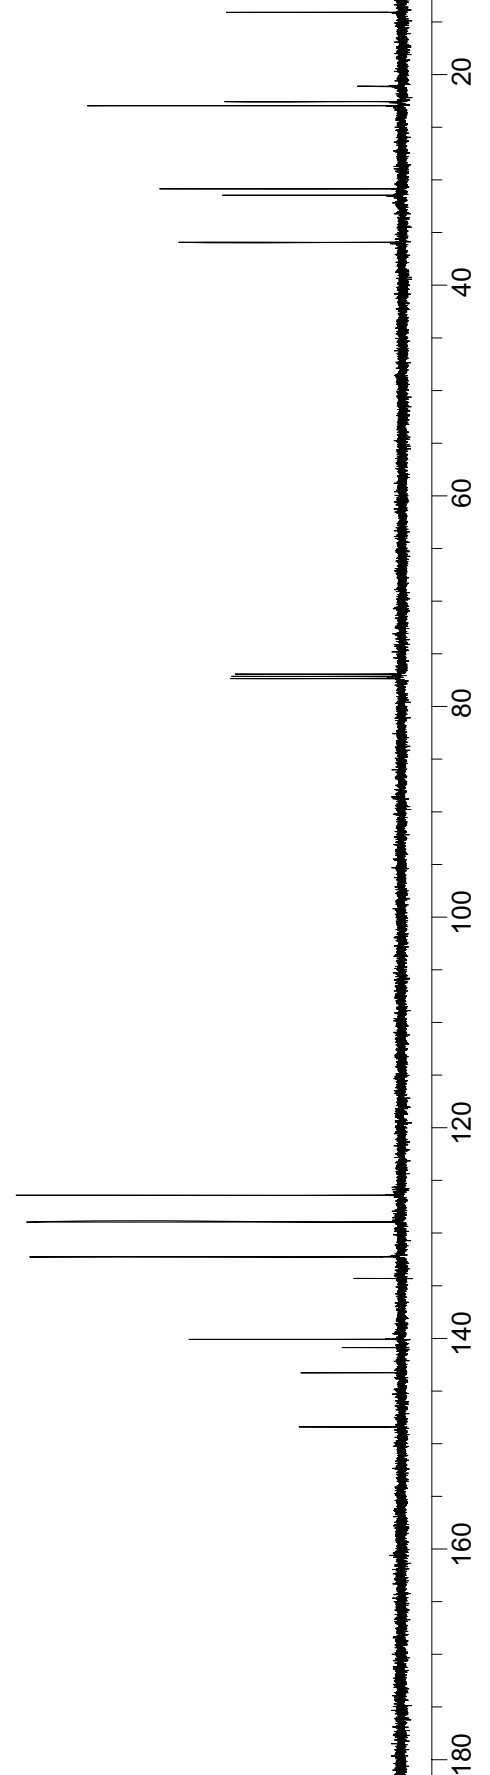

|             |                             |
|-------------|-----------------------------|
| Std carbon  | USER: -- DATE: Jul 22 2011  |
| F1: 150.742 | PTS1d: 32768                |
| F2: 599.440 | OF1: 13307.9                |
| EX: s2pul   | NA: 512                     |
|             | LB: 0.0                     |
|             | PD: 1.0 sec                 |
|             | PW: 8.0 usec                |
|             | SW1: 29996                  |
|             | WinNuts - \$HJC-2-62C-2.fid |

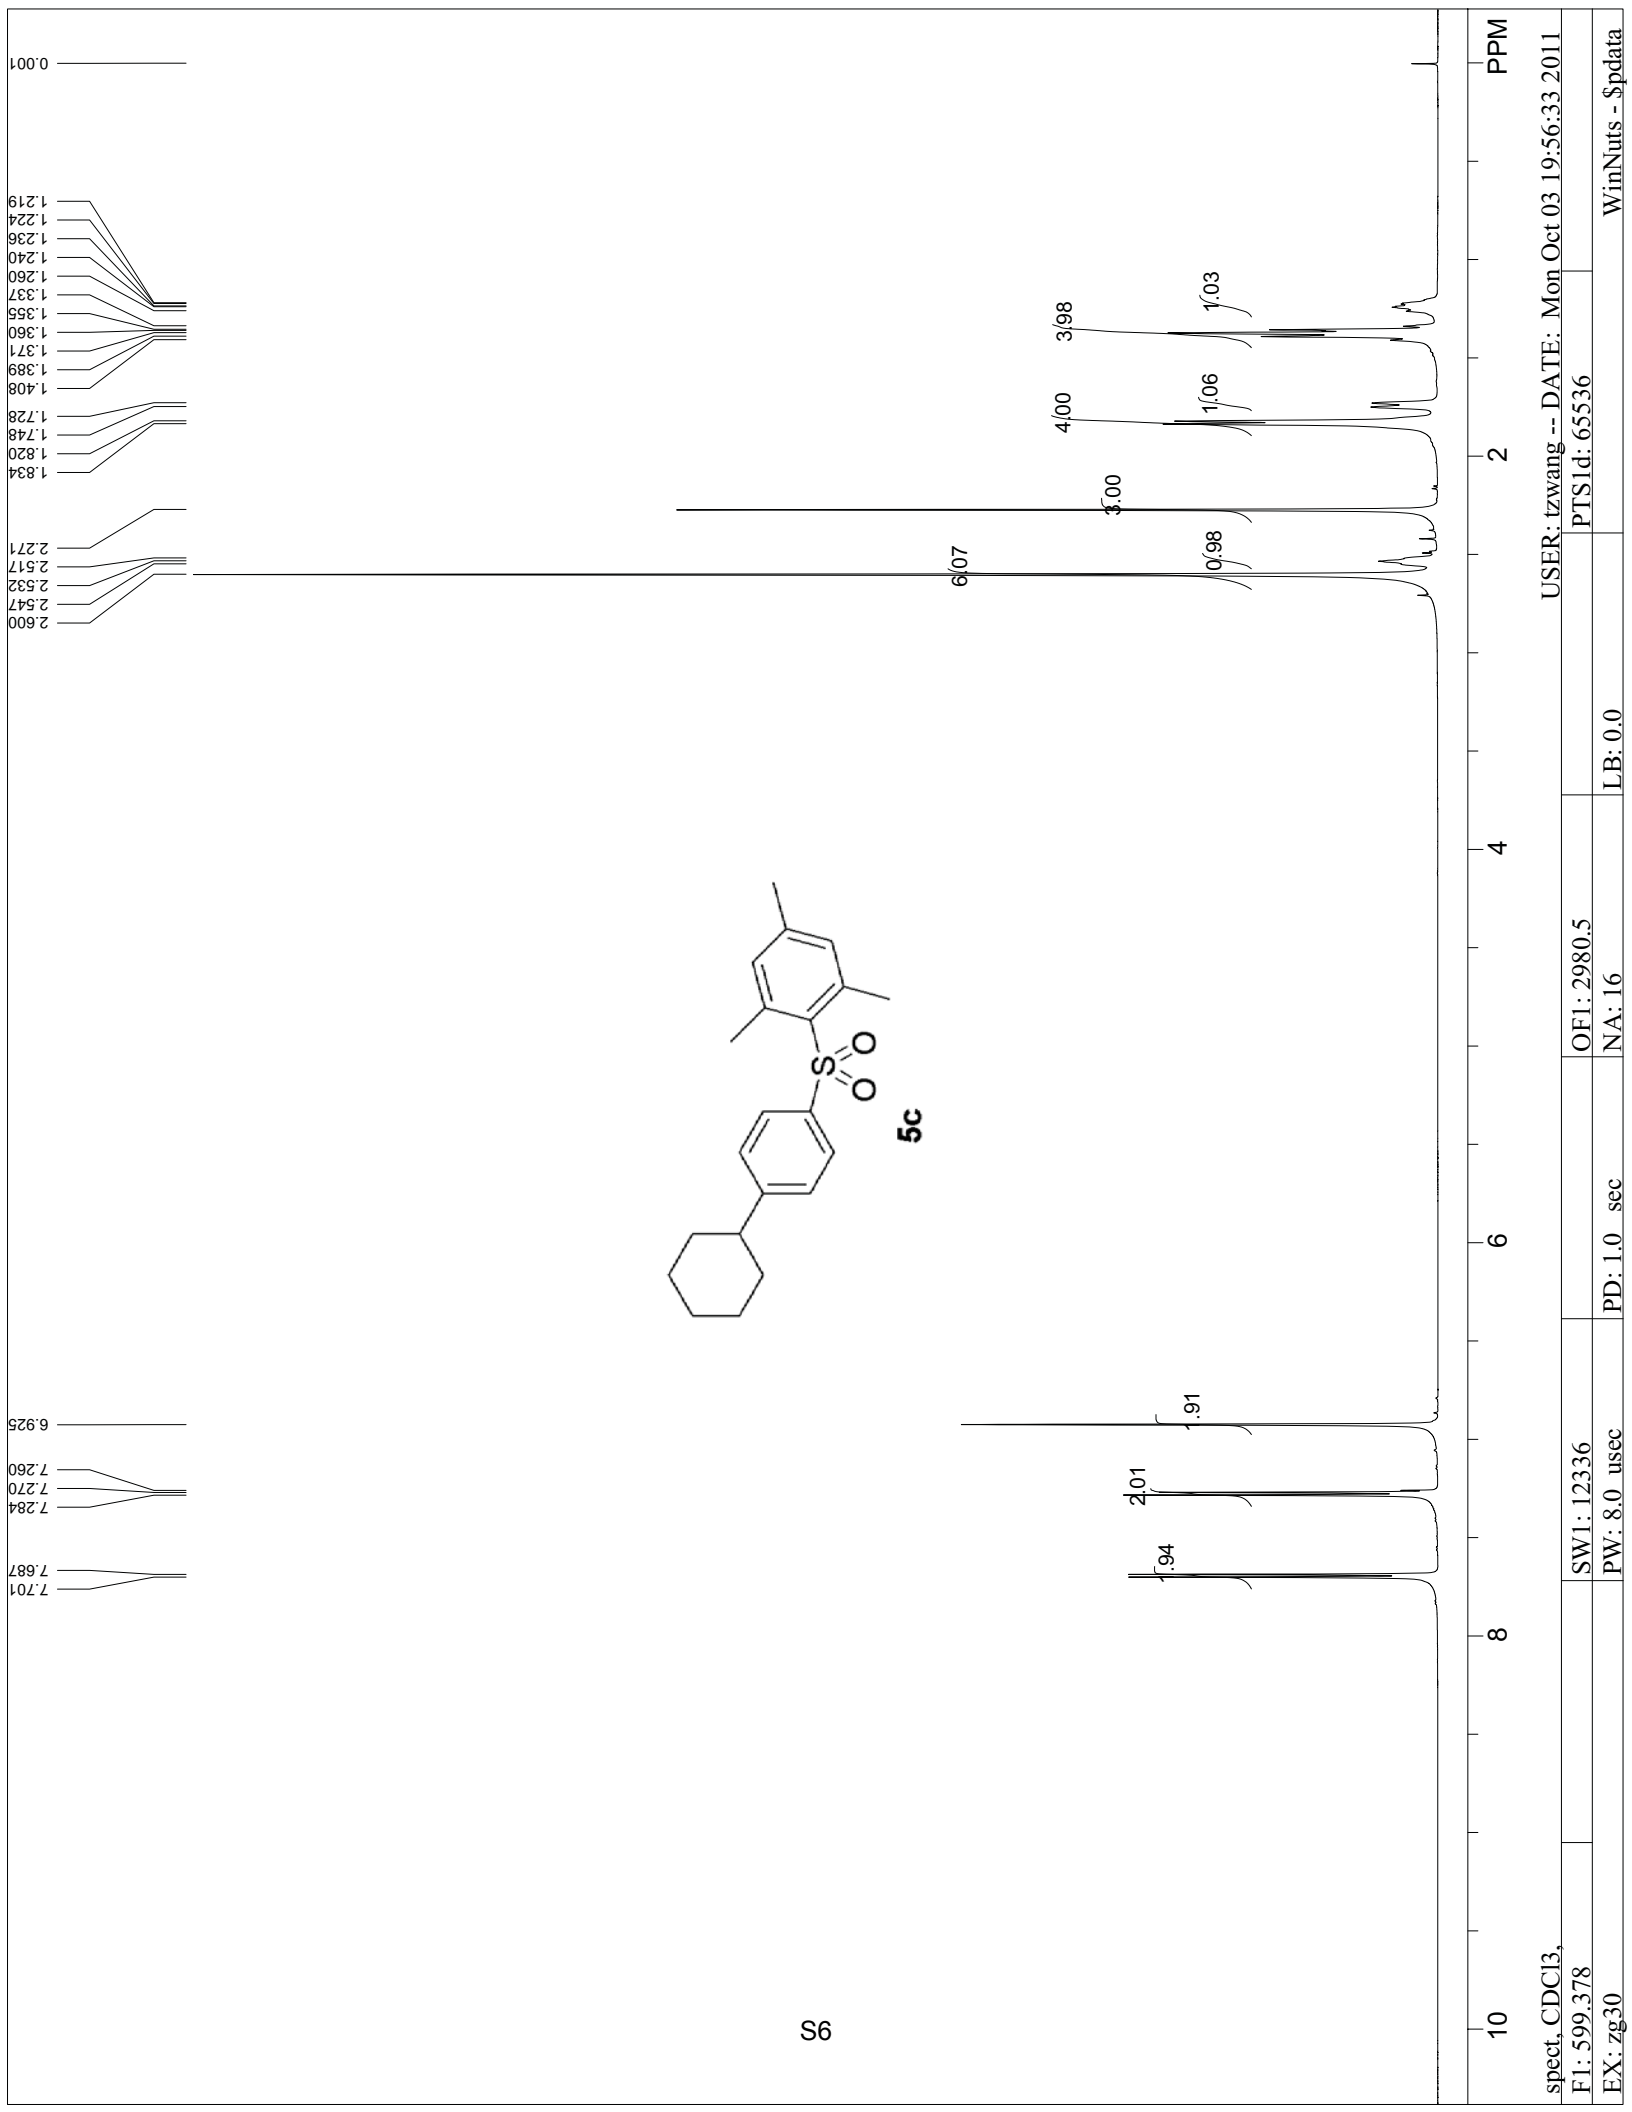

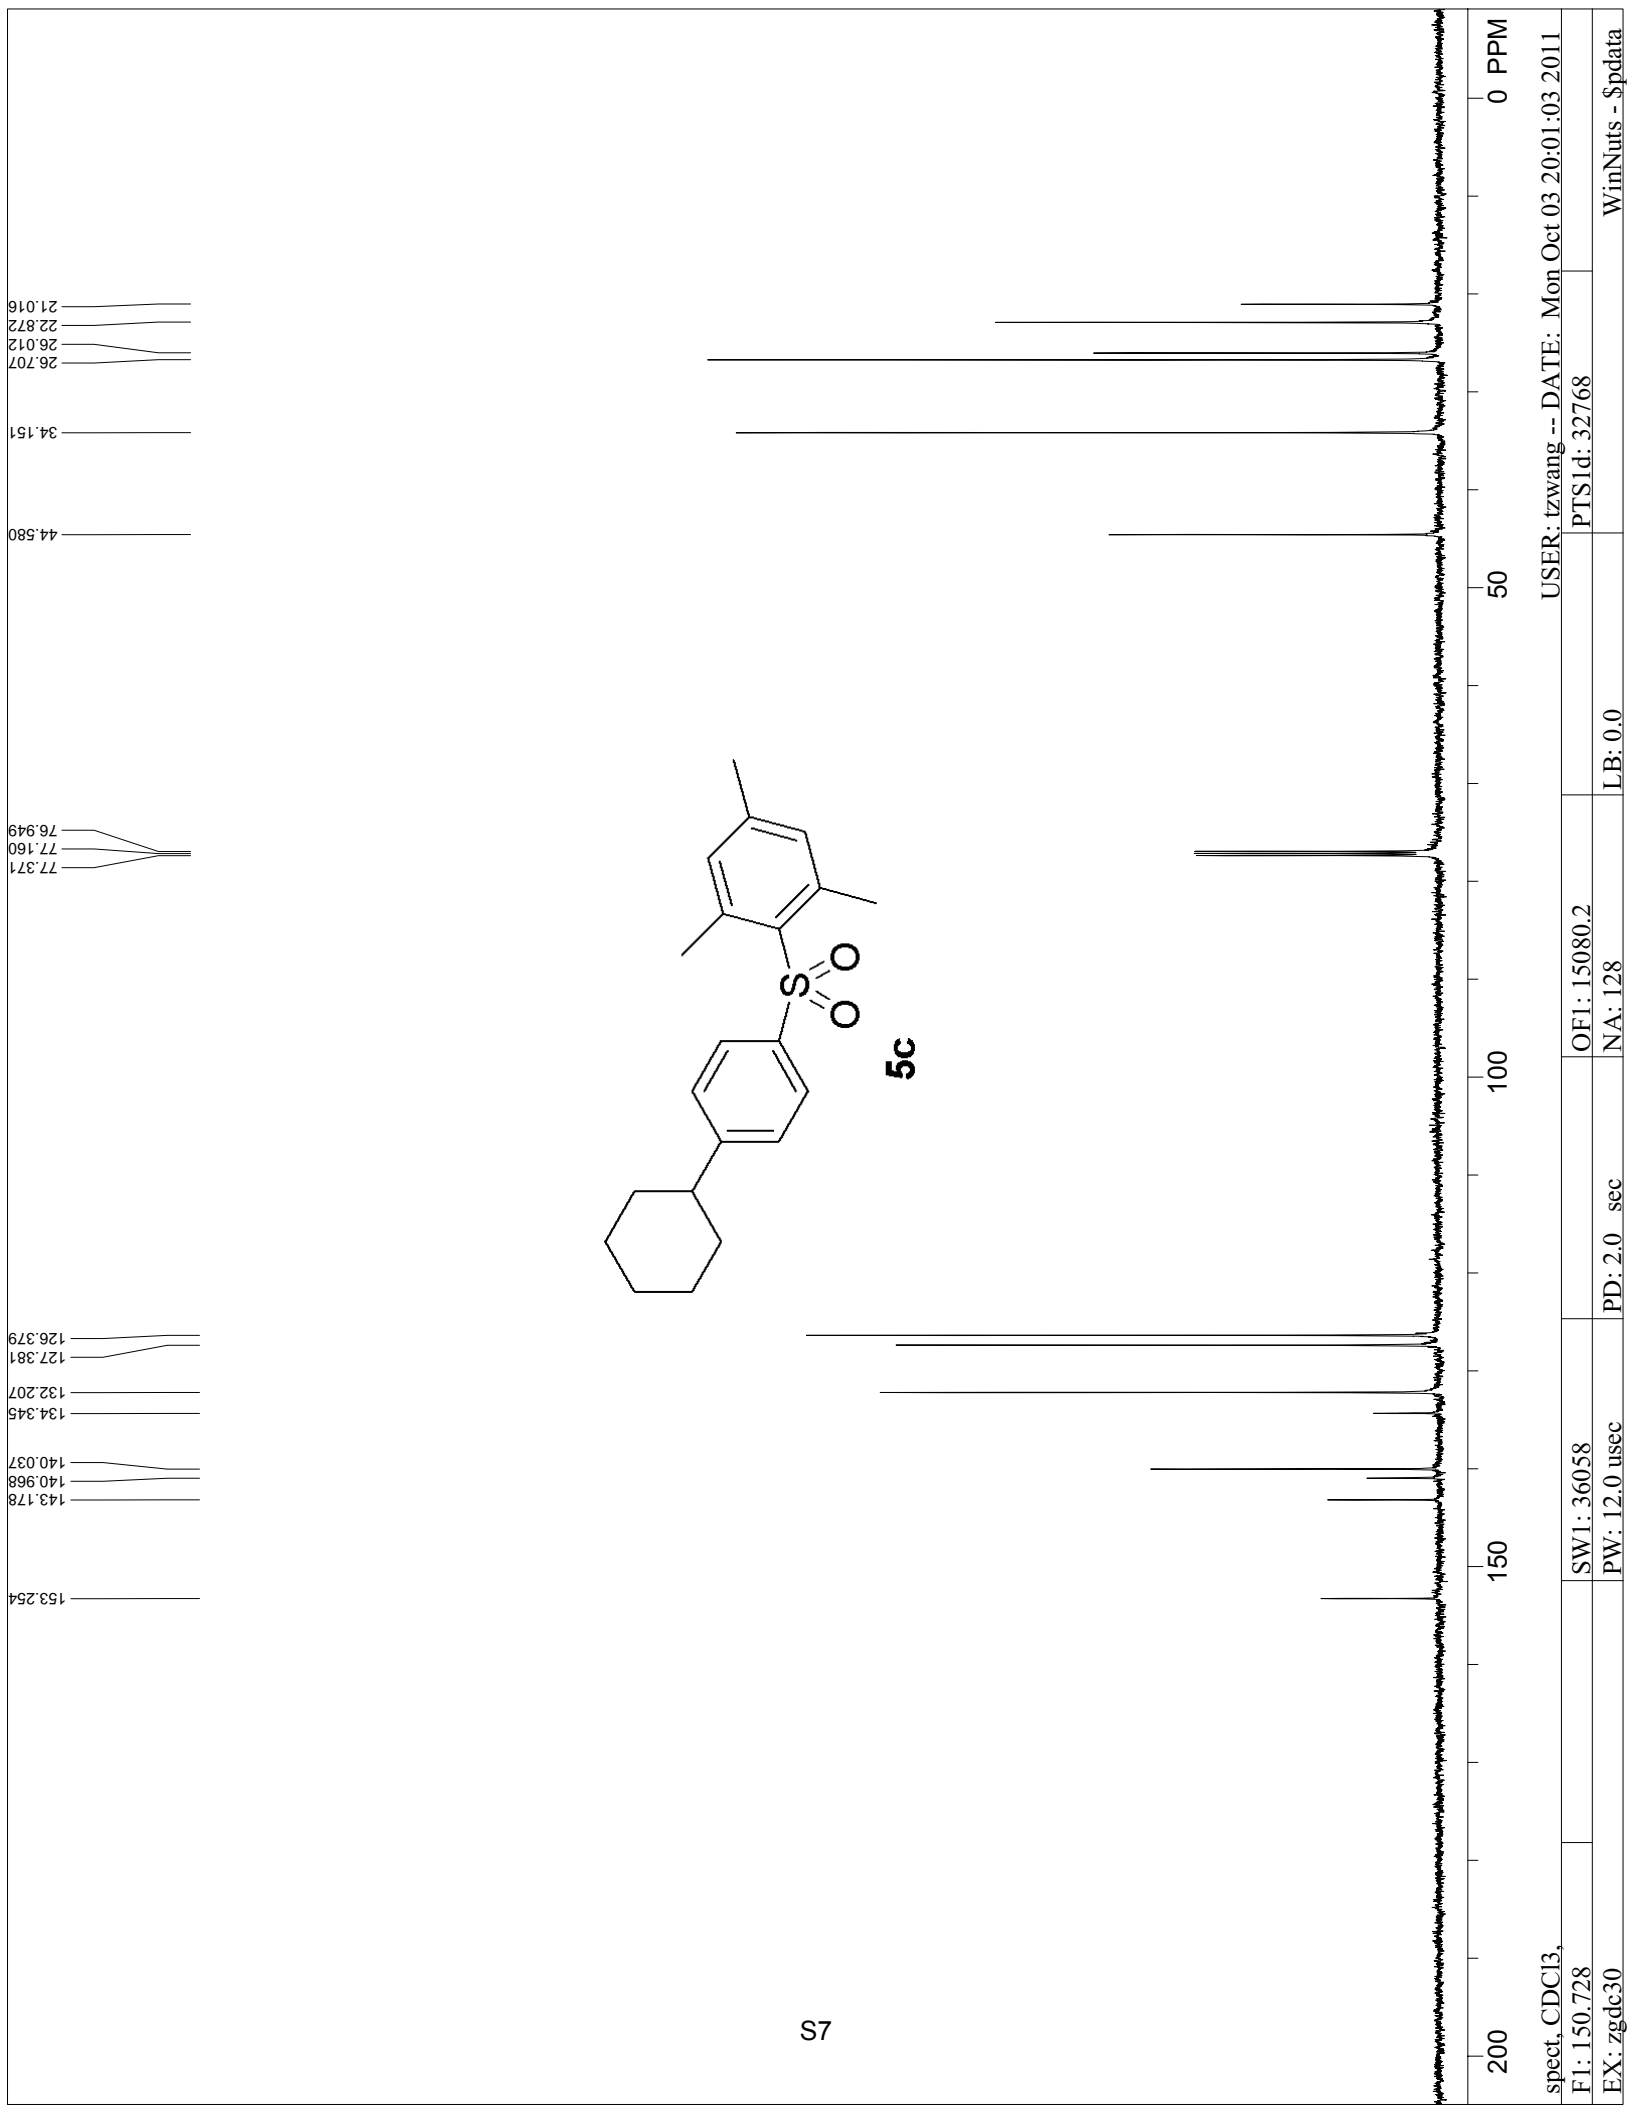

spect, CDCl3, USER: tzwang -- DATE: Mon Oct 03 20:01:03 2011  
 F1: 150.728 OF1: 15080.2 PTS1d: 32768  
 EX: zgdc30 PD: 2.0 sec LB: 0.0 WinNuts - \$pdata

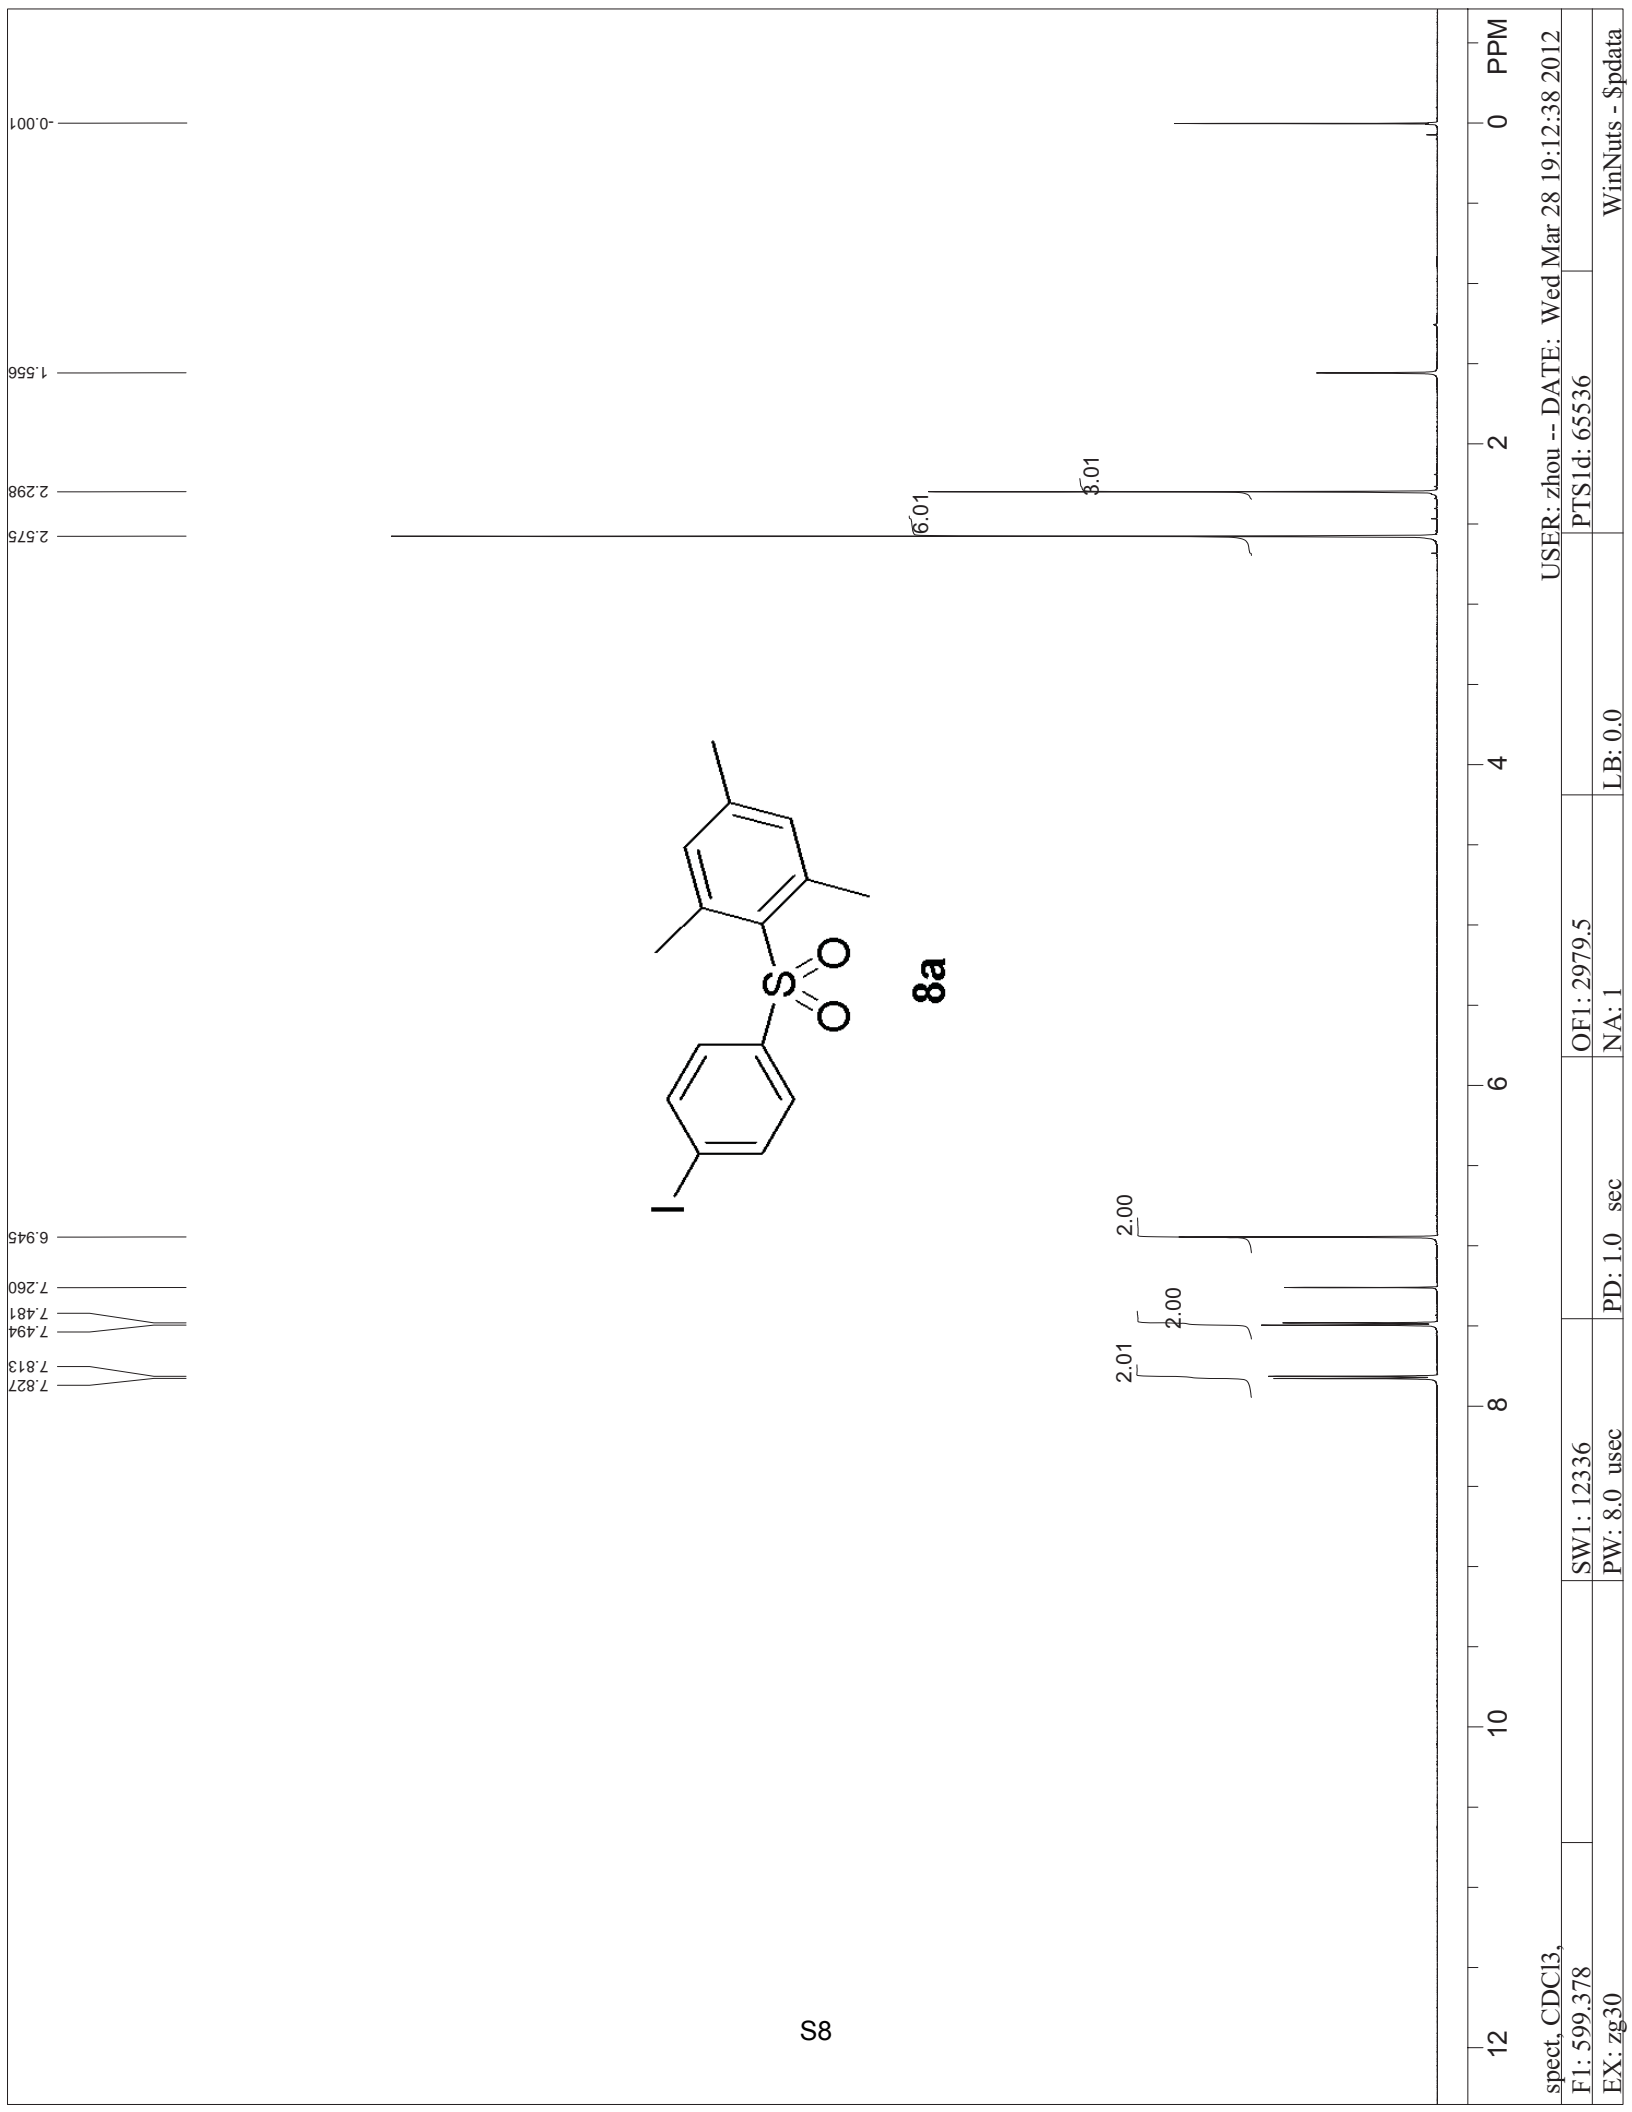



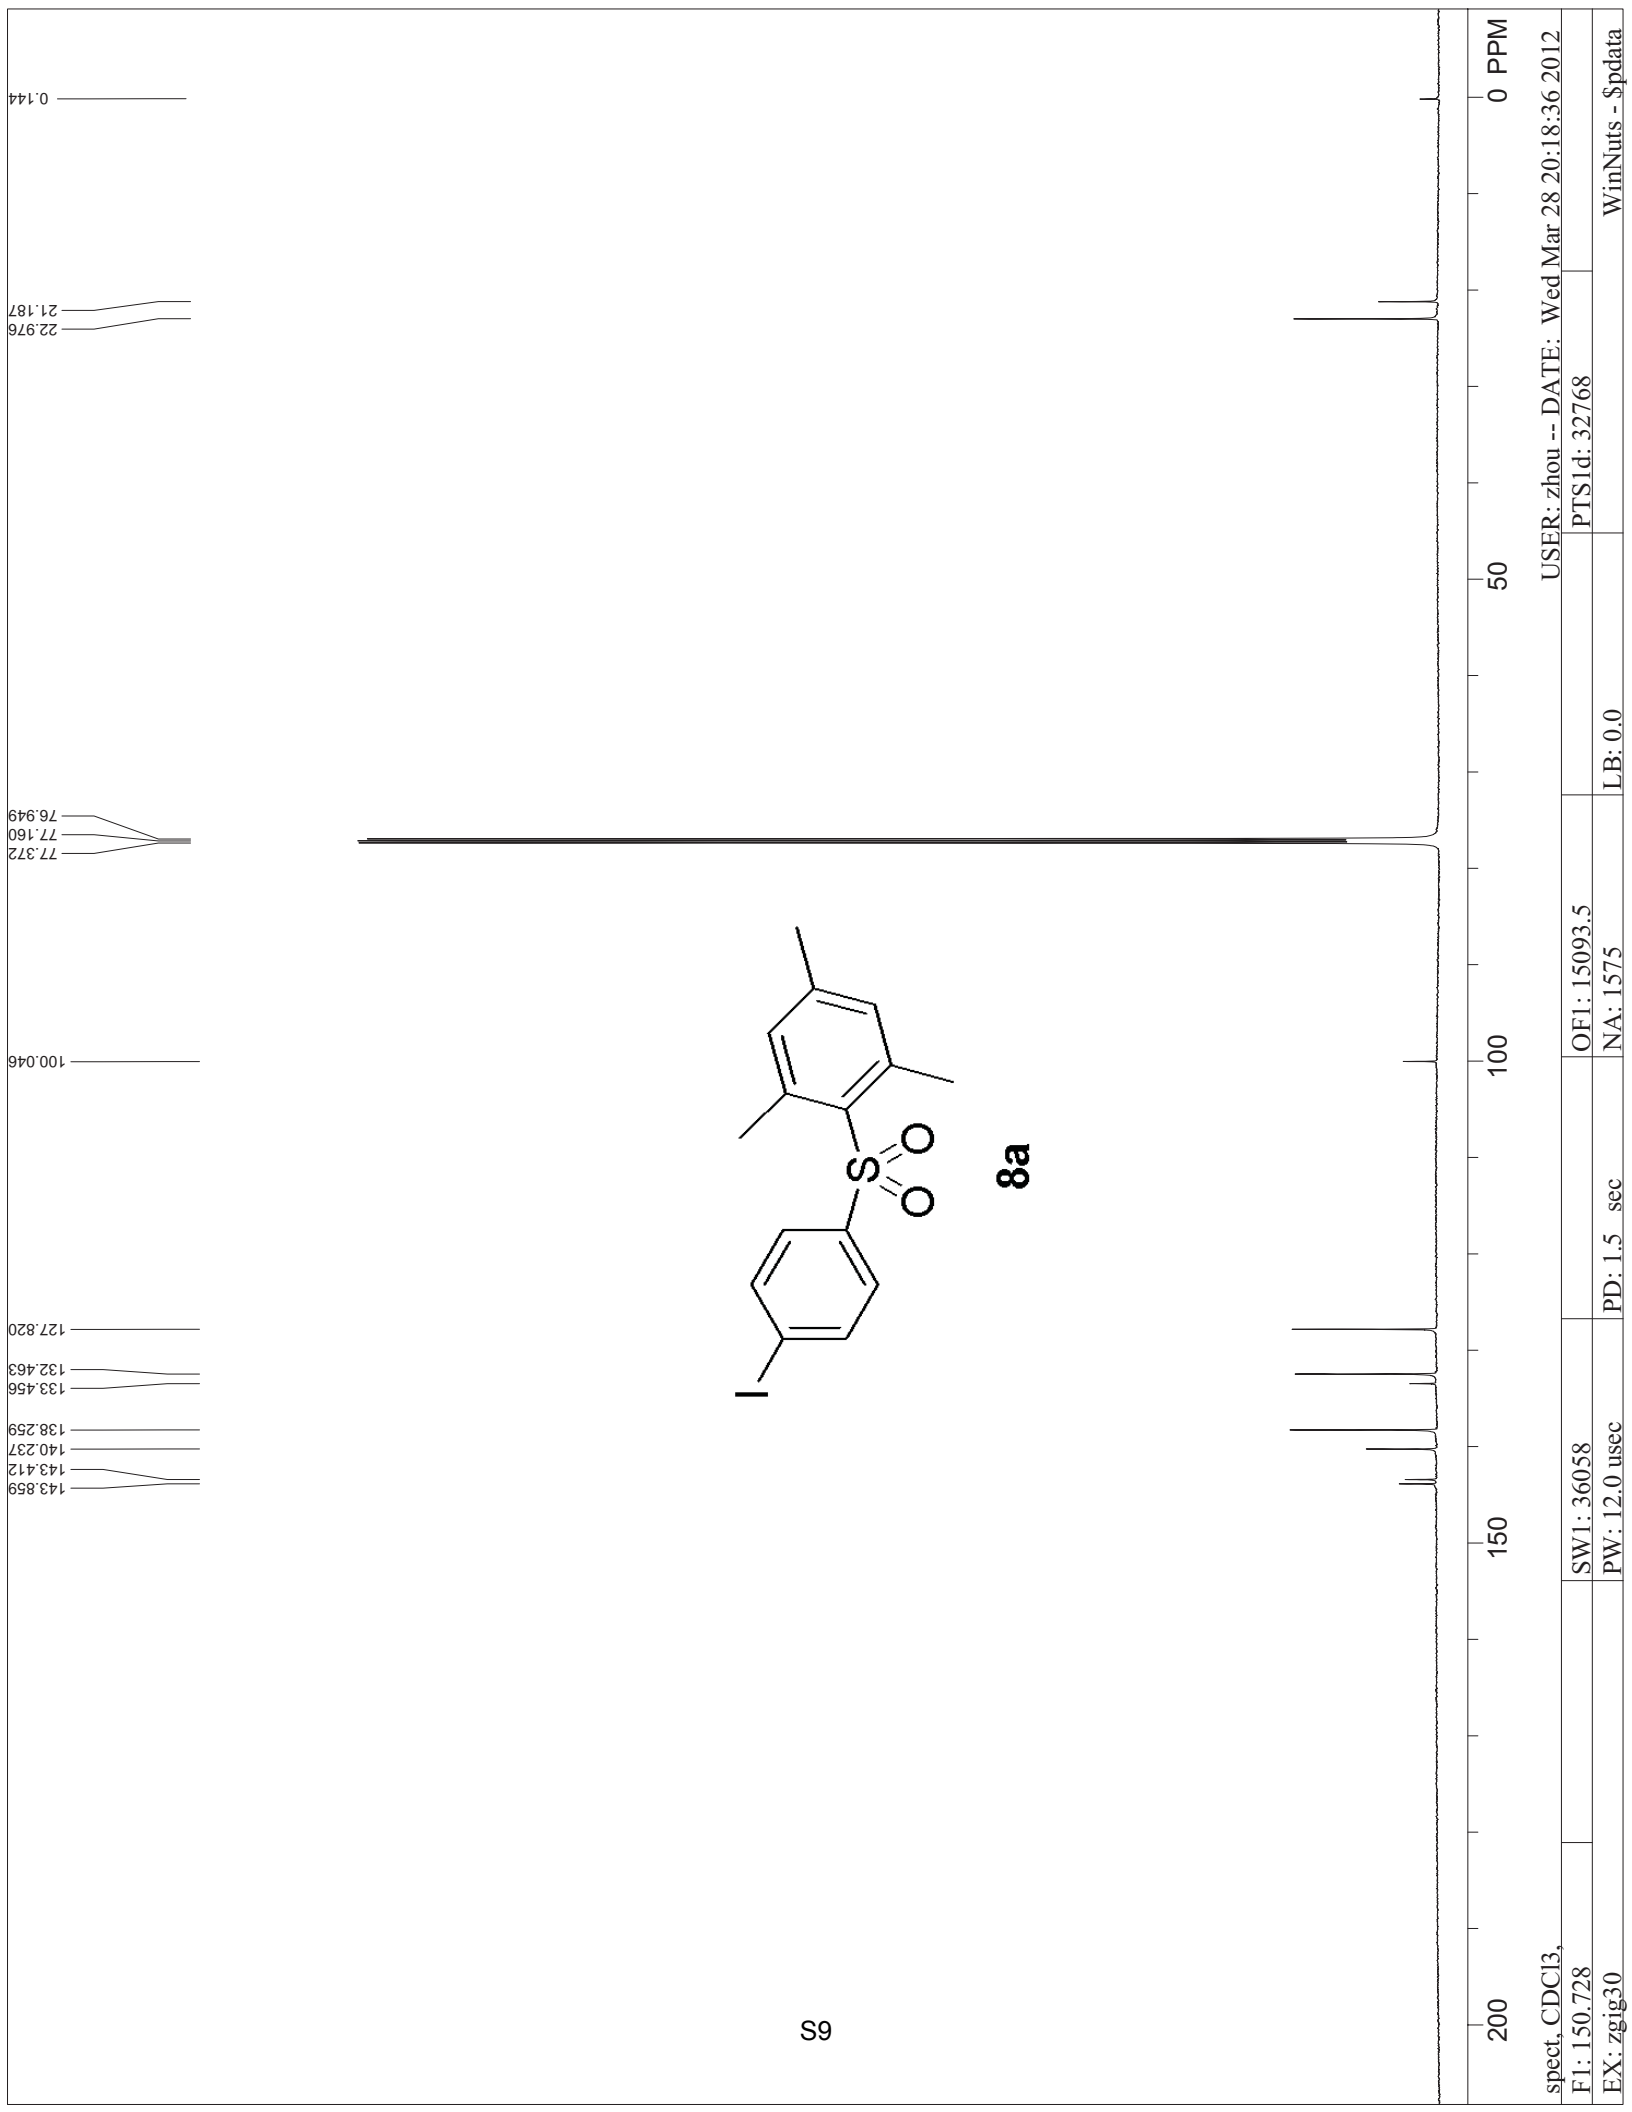

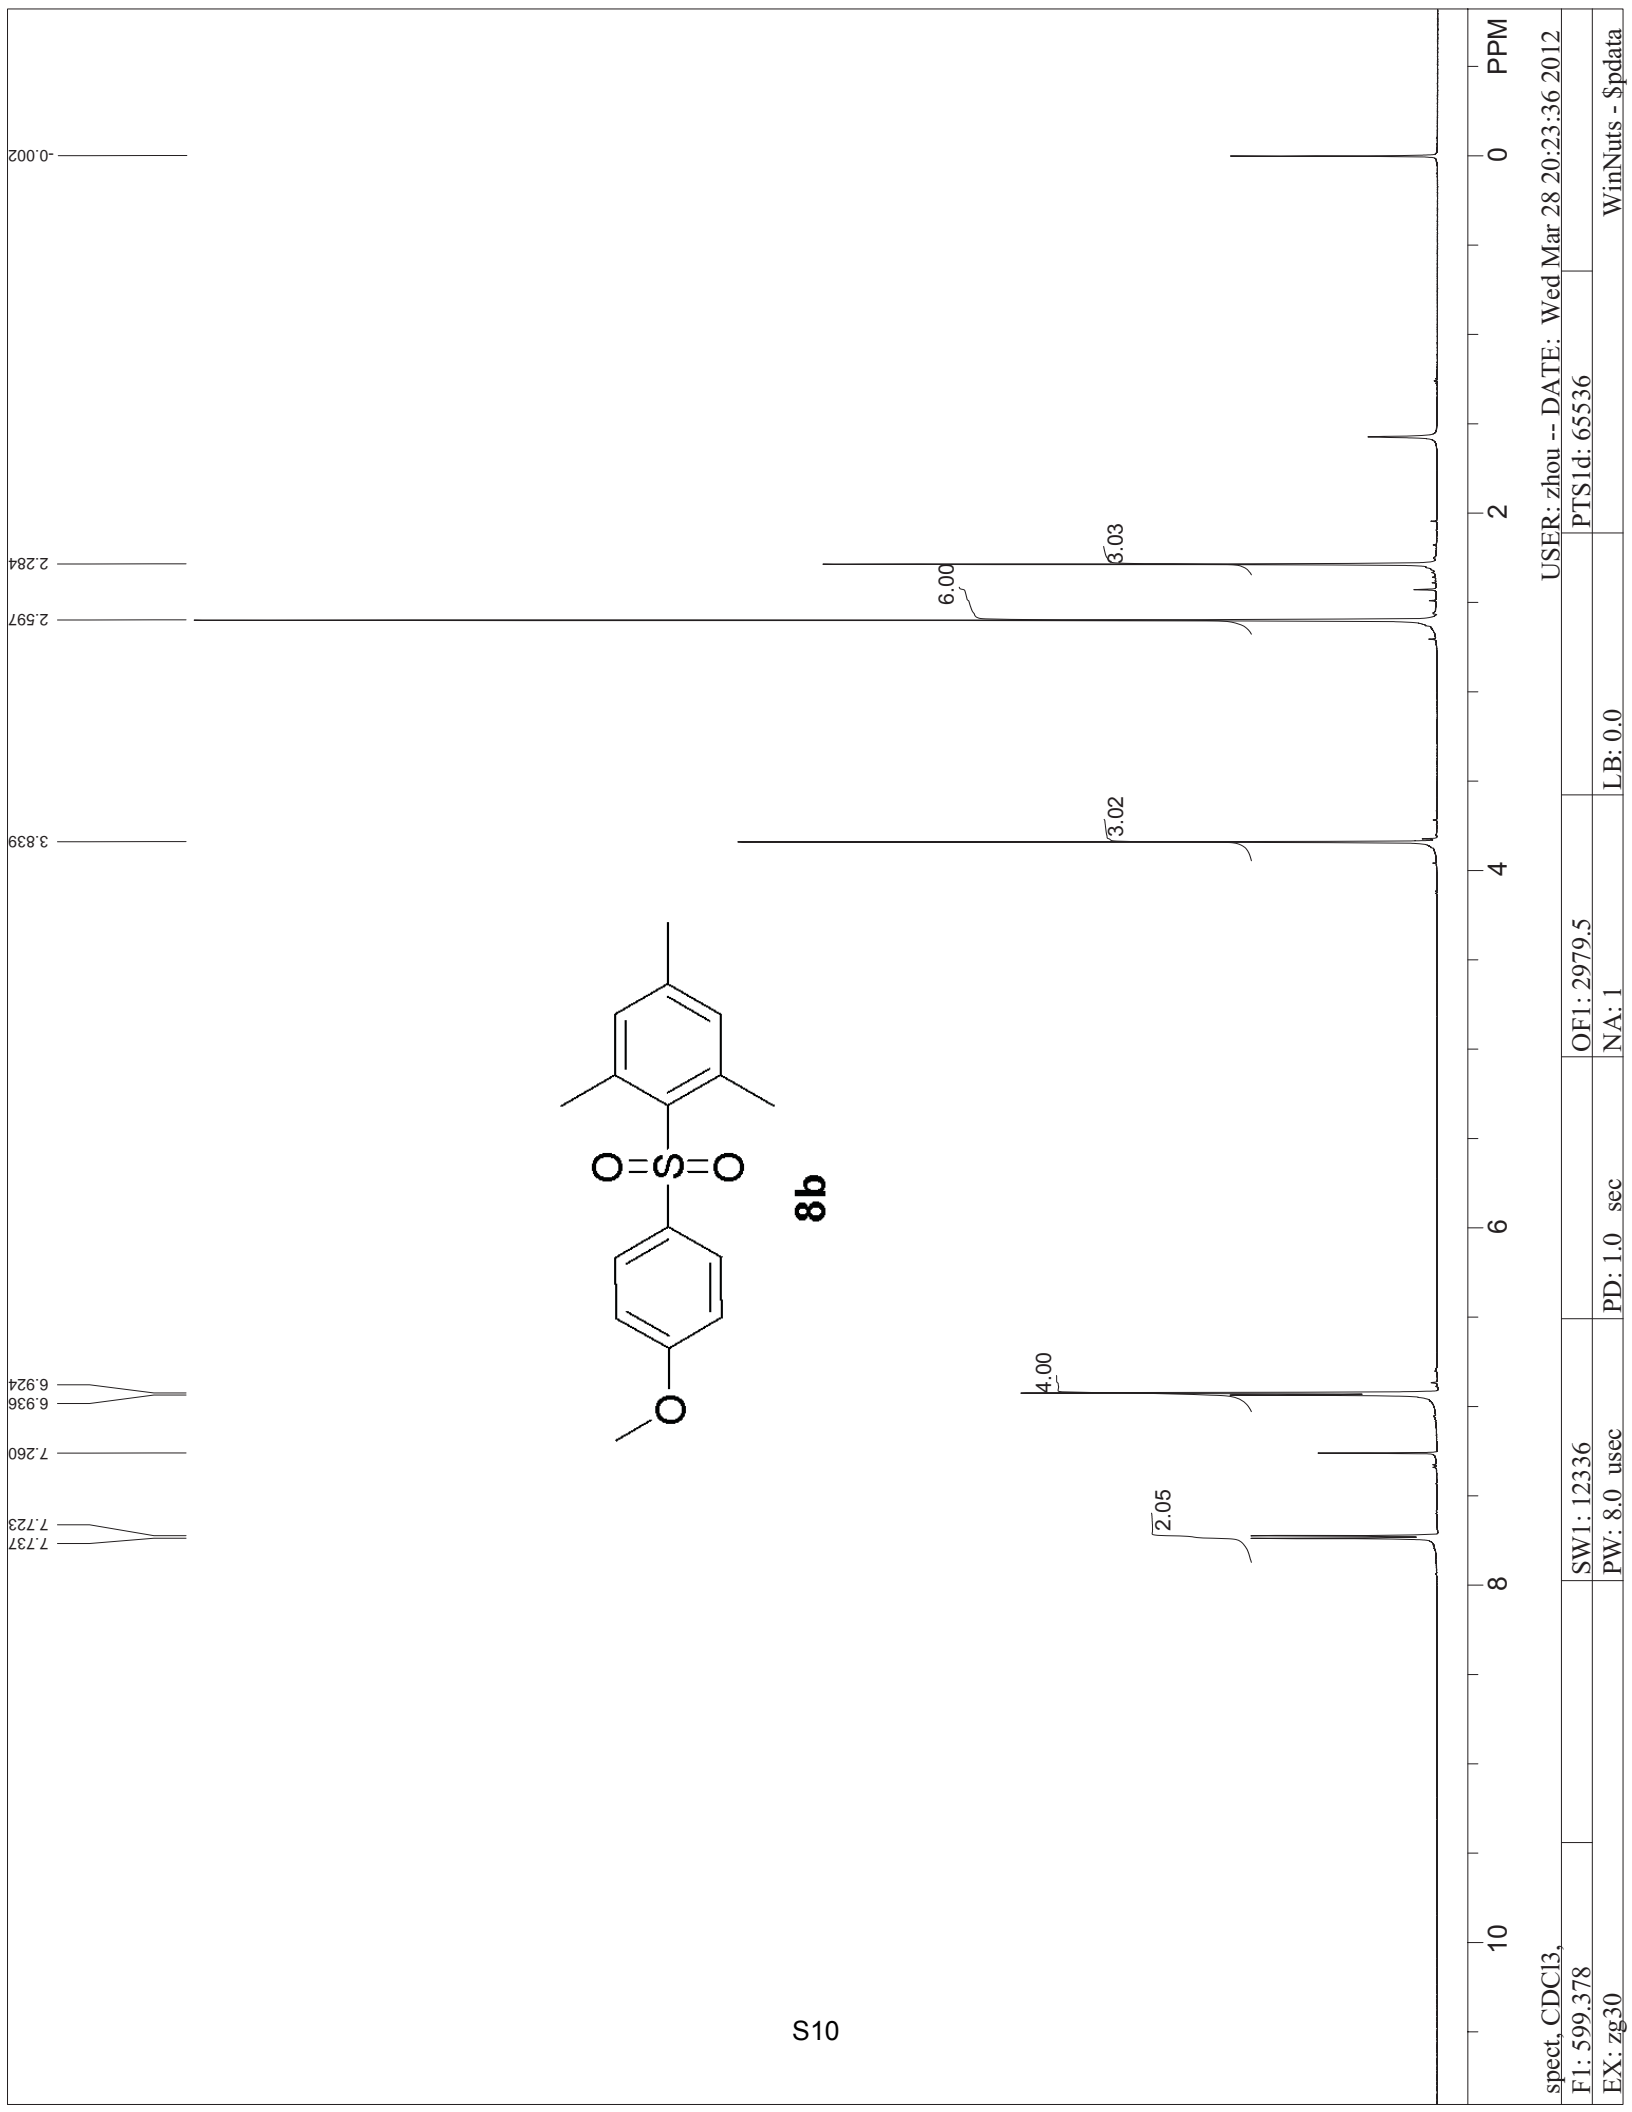

S10

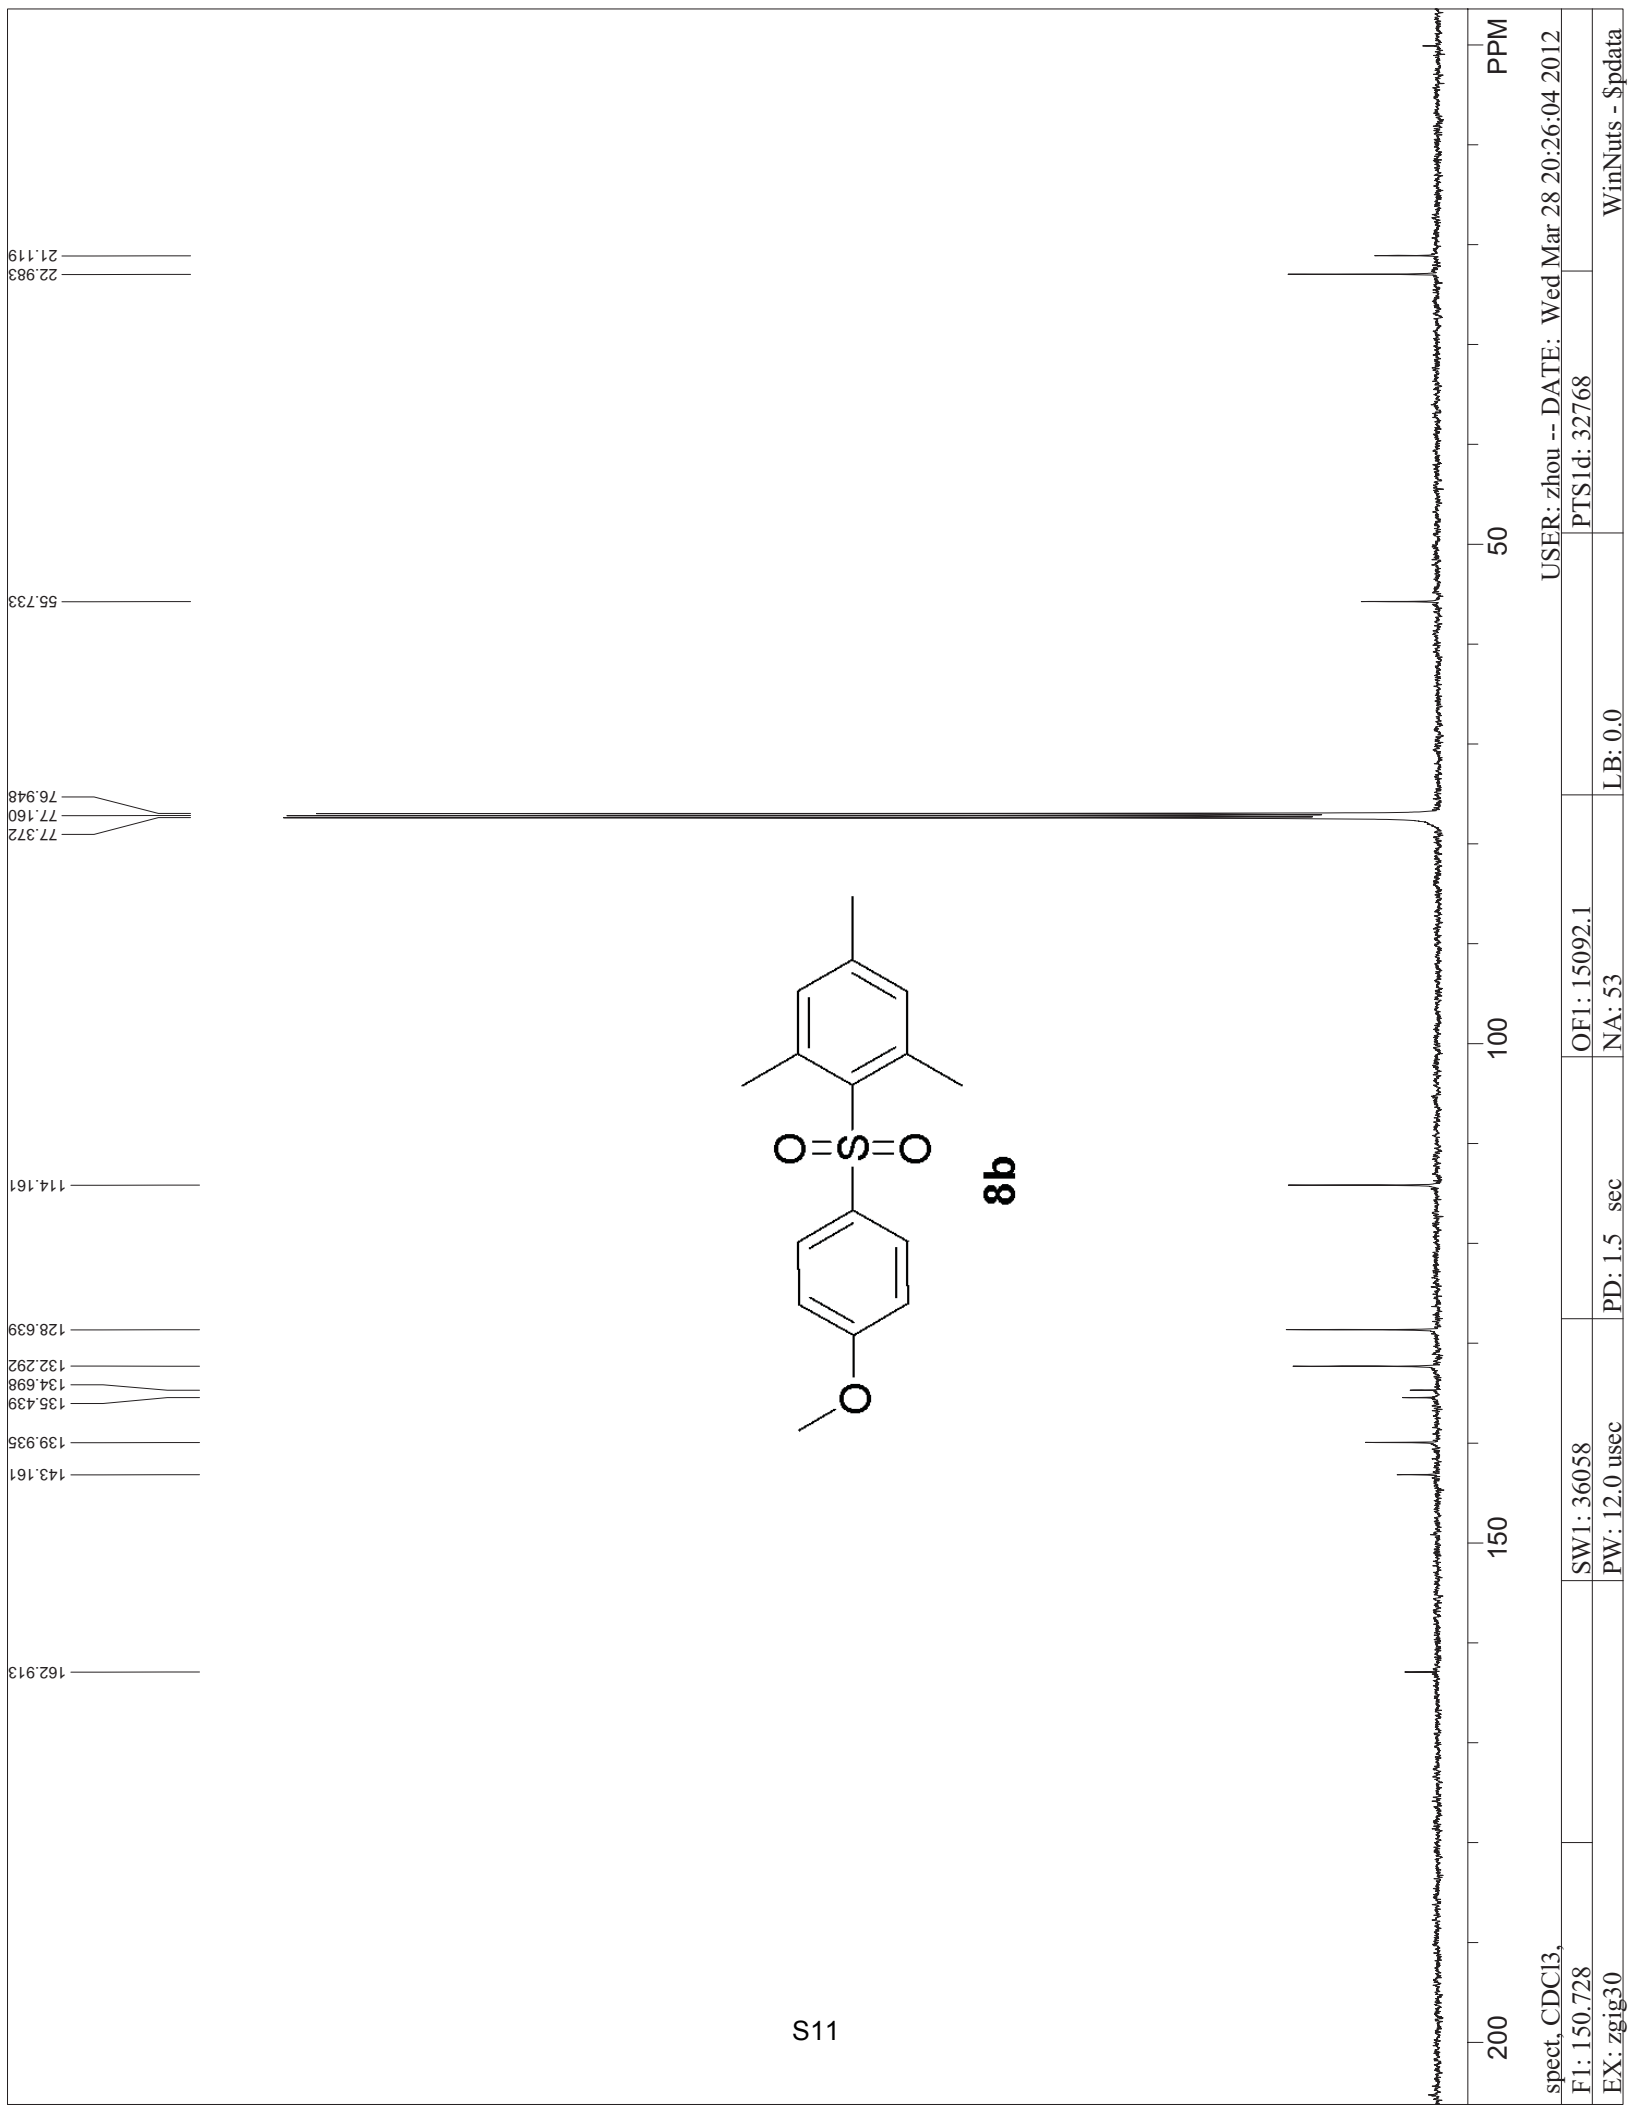

S11

spect, CDCl3, USER: zhou -- DATE: Wed Mar 28 20:26:04 2012  
 F1: 150.728 SW1: 36058 OF1: 15092.1 PTS1d: 32768  
 EX: zgig30 PW: 12.0 usec PD: 1.5 sec LB: 0.0 WinNuts - \$pdata

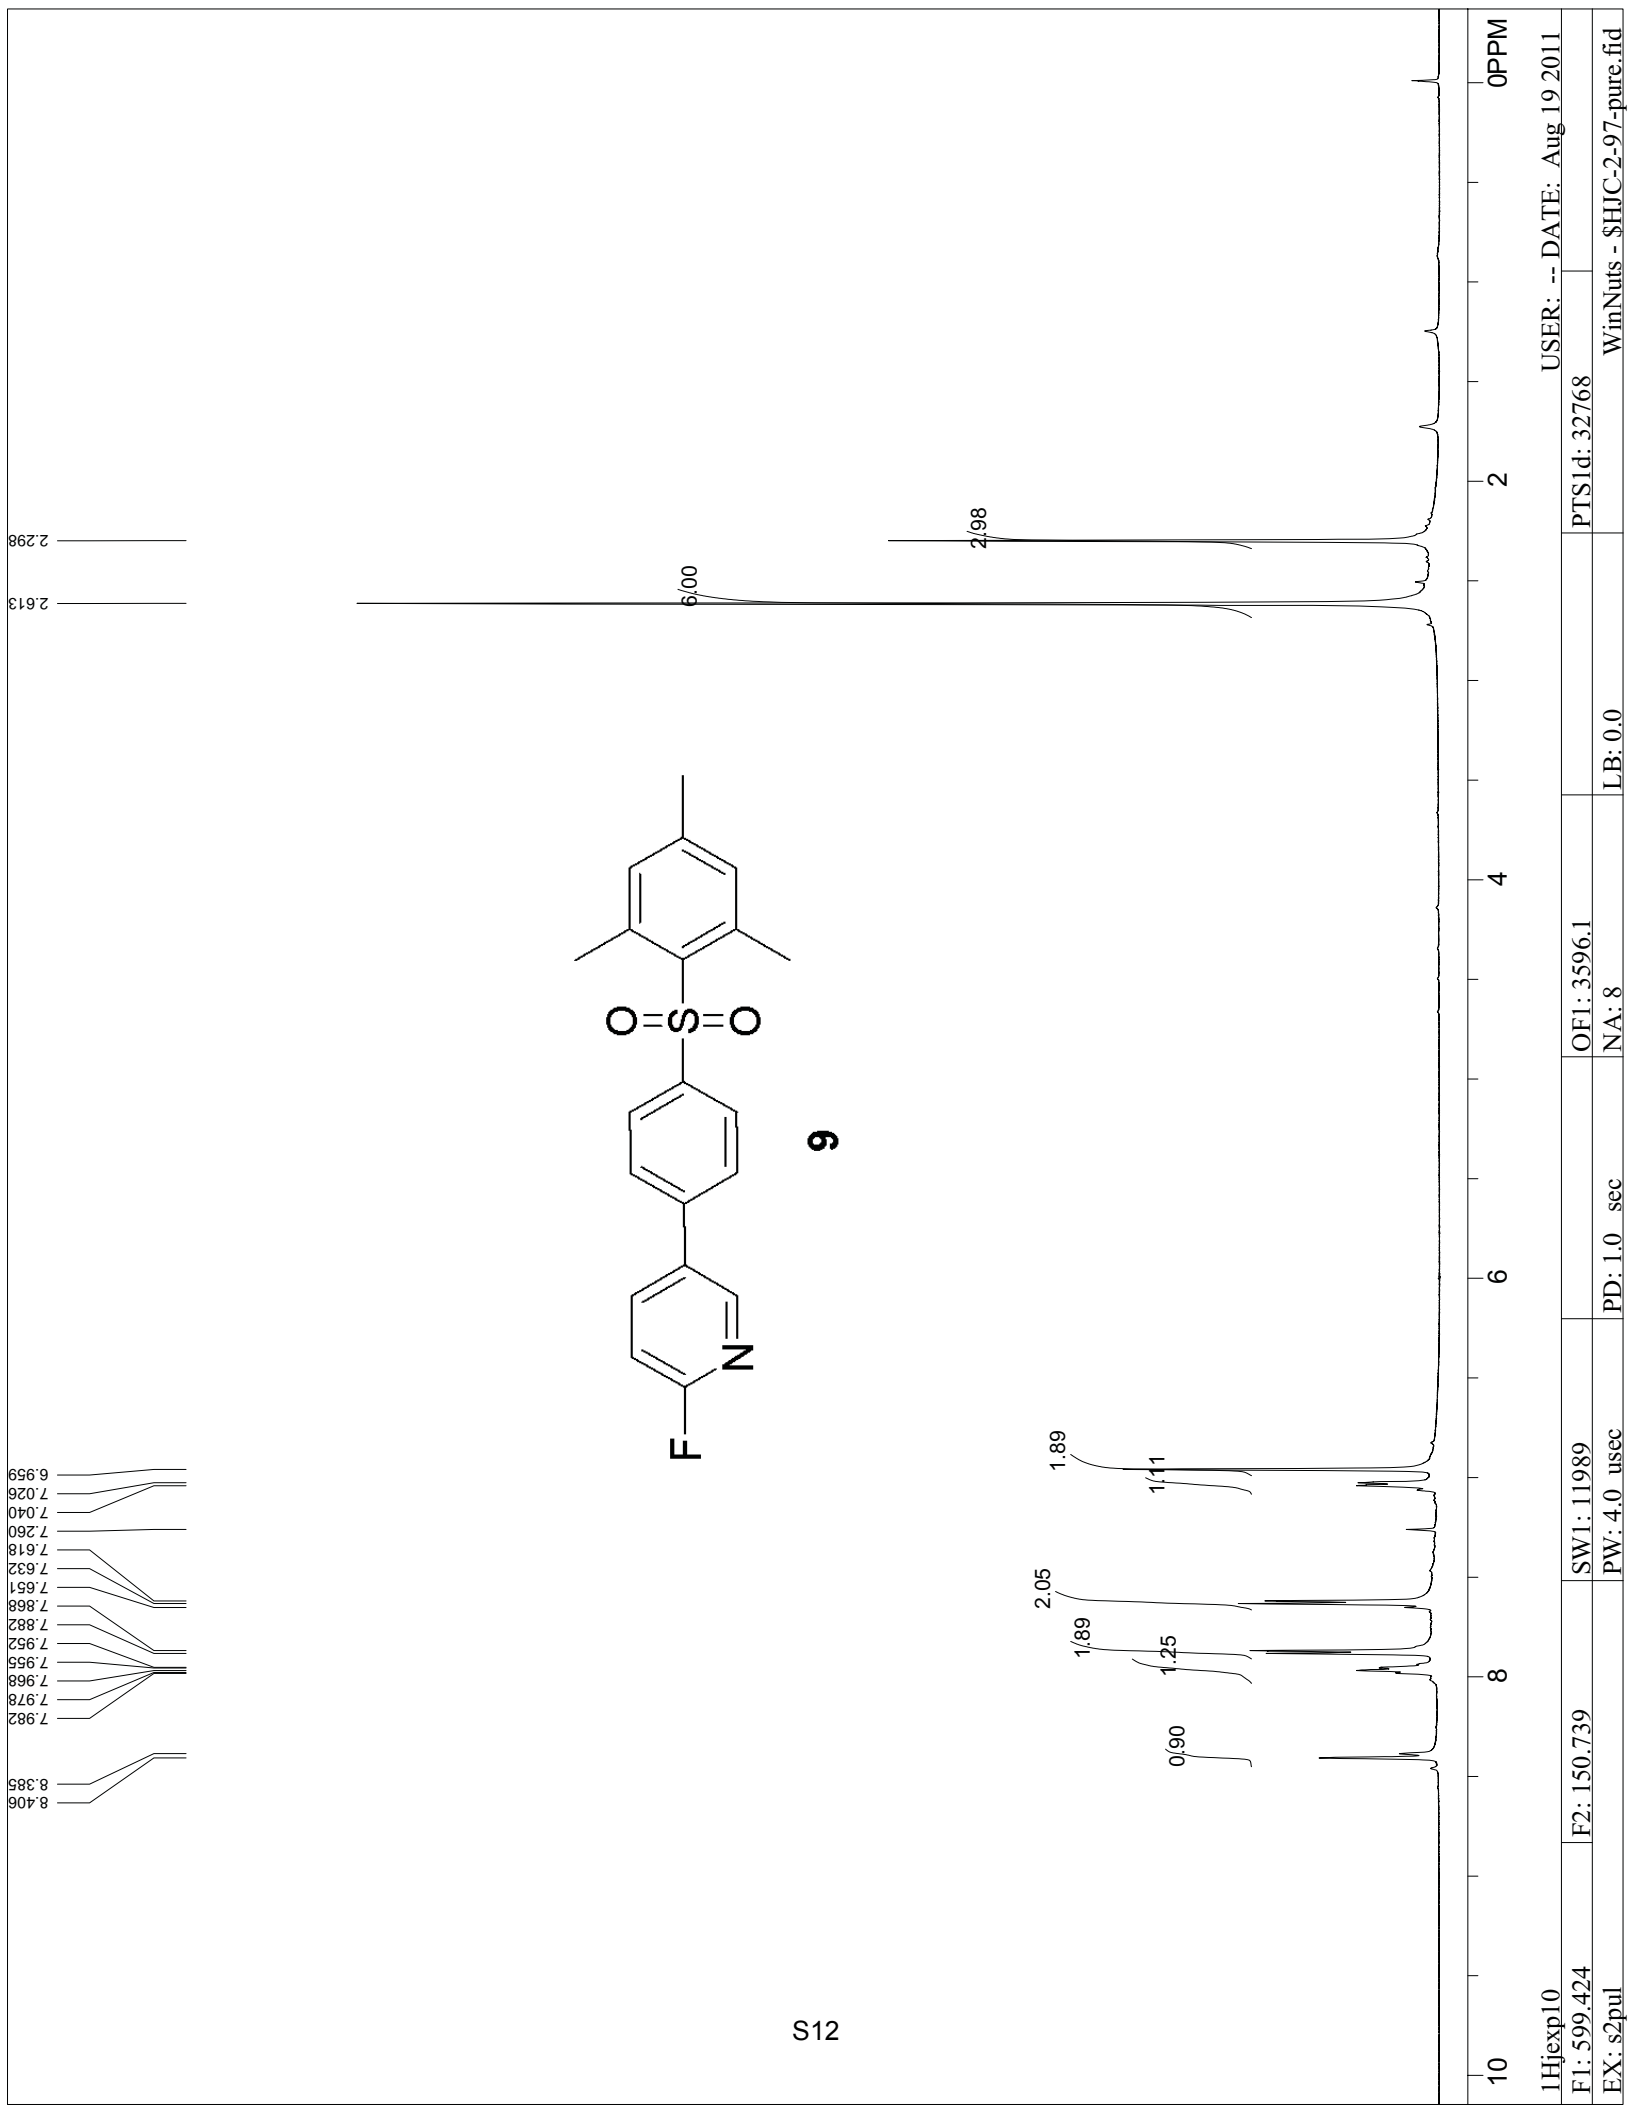

1Hjexp10  
 F1: 599.424 F2: 150.739 SW1: 11989 OF1: 3596.1  
 EX: s2pul PW: 4.0 usec PD: 1.0 sec NA: 8 LB: 0.0  
 USER: -- DATE: Aug 19 2011 PTS1d: 32768  
 WinNuts - \$HJC-2-97-pure.fid

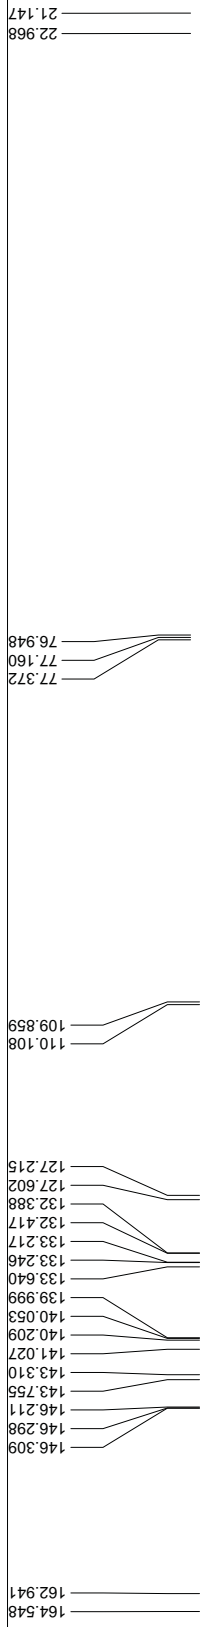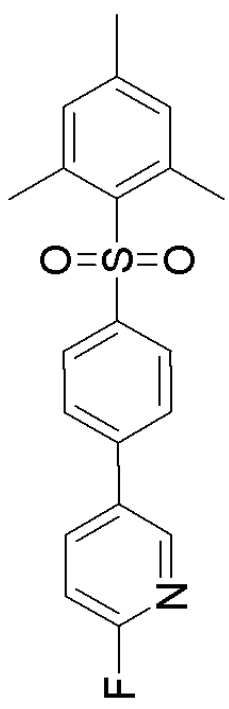

9

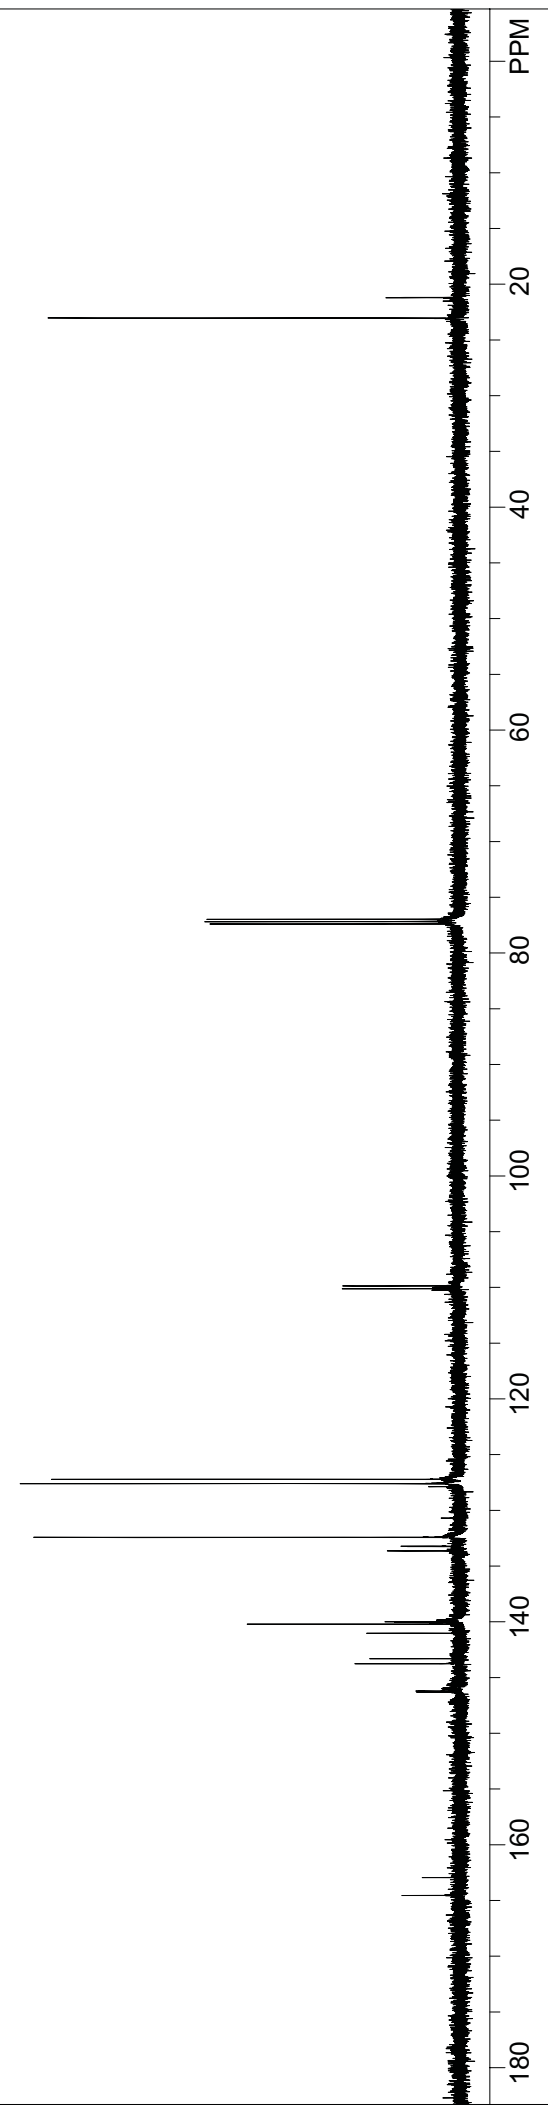

|             |              |              |                                  |
|-------------|--------------|--------------|----------------------------------|
| Std carbon  | OFI: 13302.6 | PTS1d: 32768 | USER: -- DATE: Aug 19 2011       |
| F1: 150.738 | NA: 1024     | LB: 0.0      | WinNuts - \$HIC-2-97C-pure-3.fid |
| EX: s2pul   | PD: 1.0 sec  |              |                                  |
|             | SW1: 29996   |              |                                  |
|             | F2: 599.423  |              |                                  |
|             | PW: 8.0 usec |              |                                  |

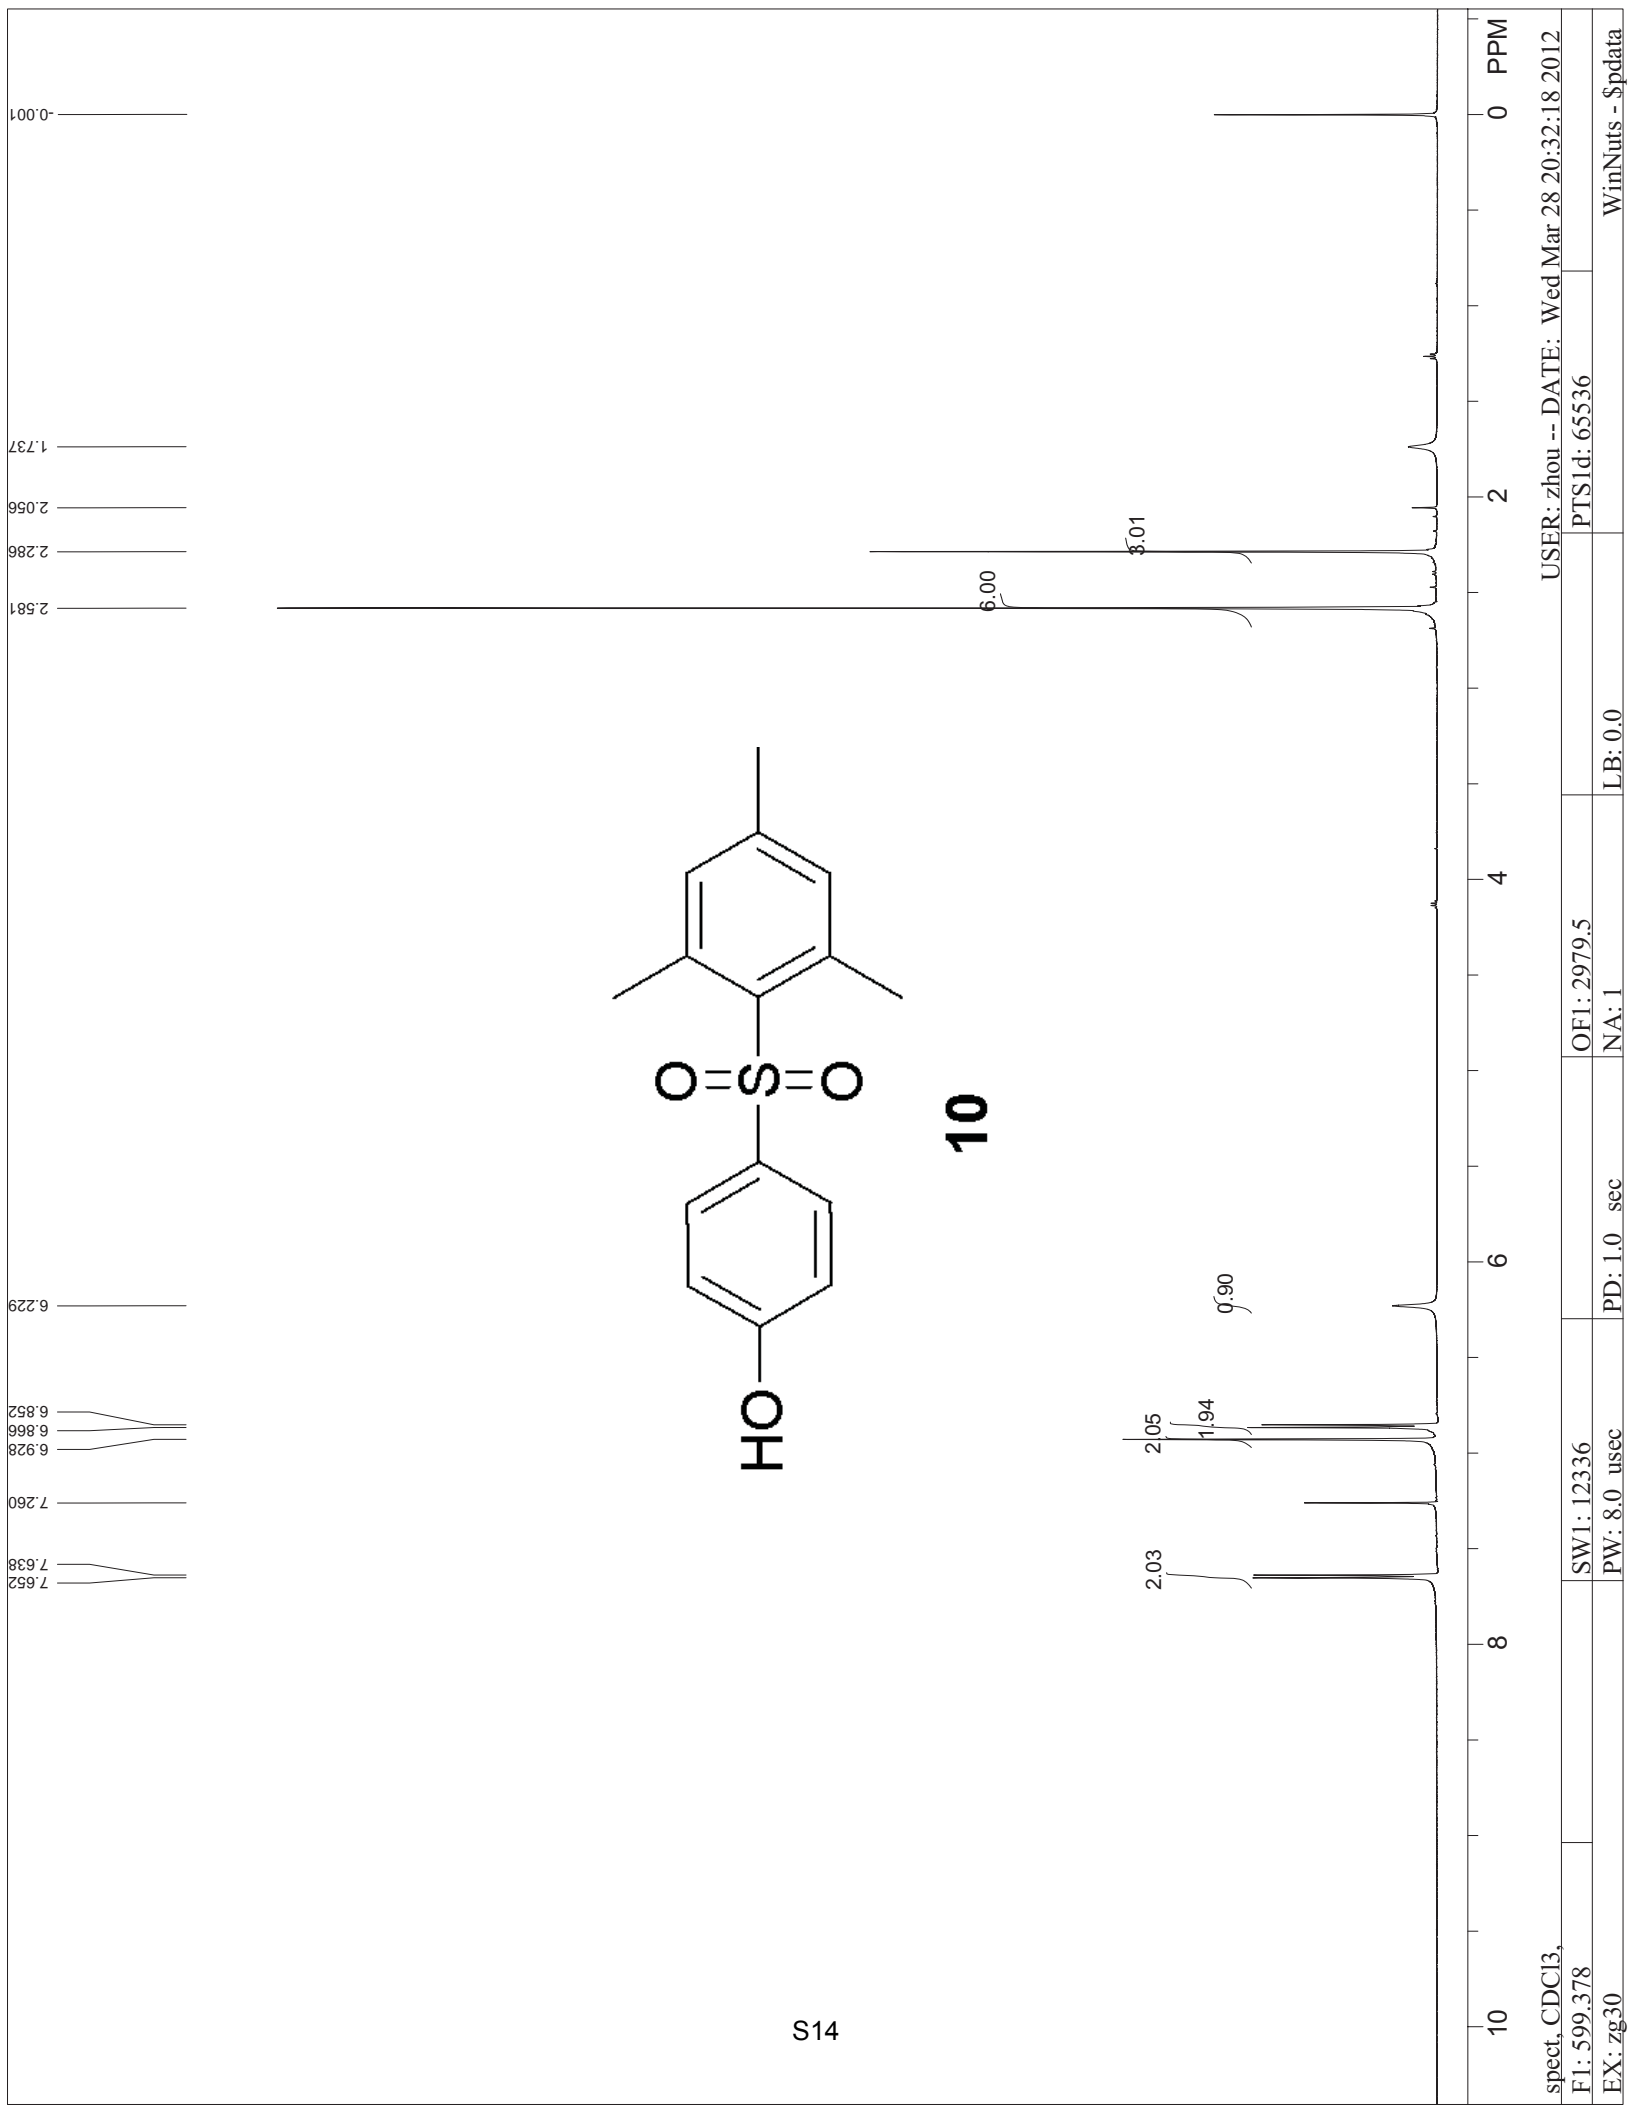

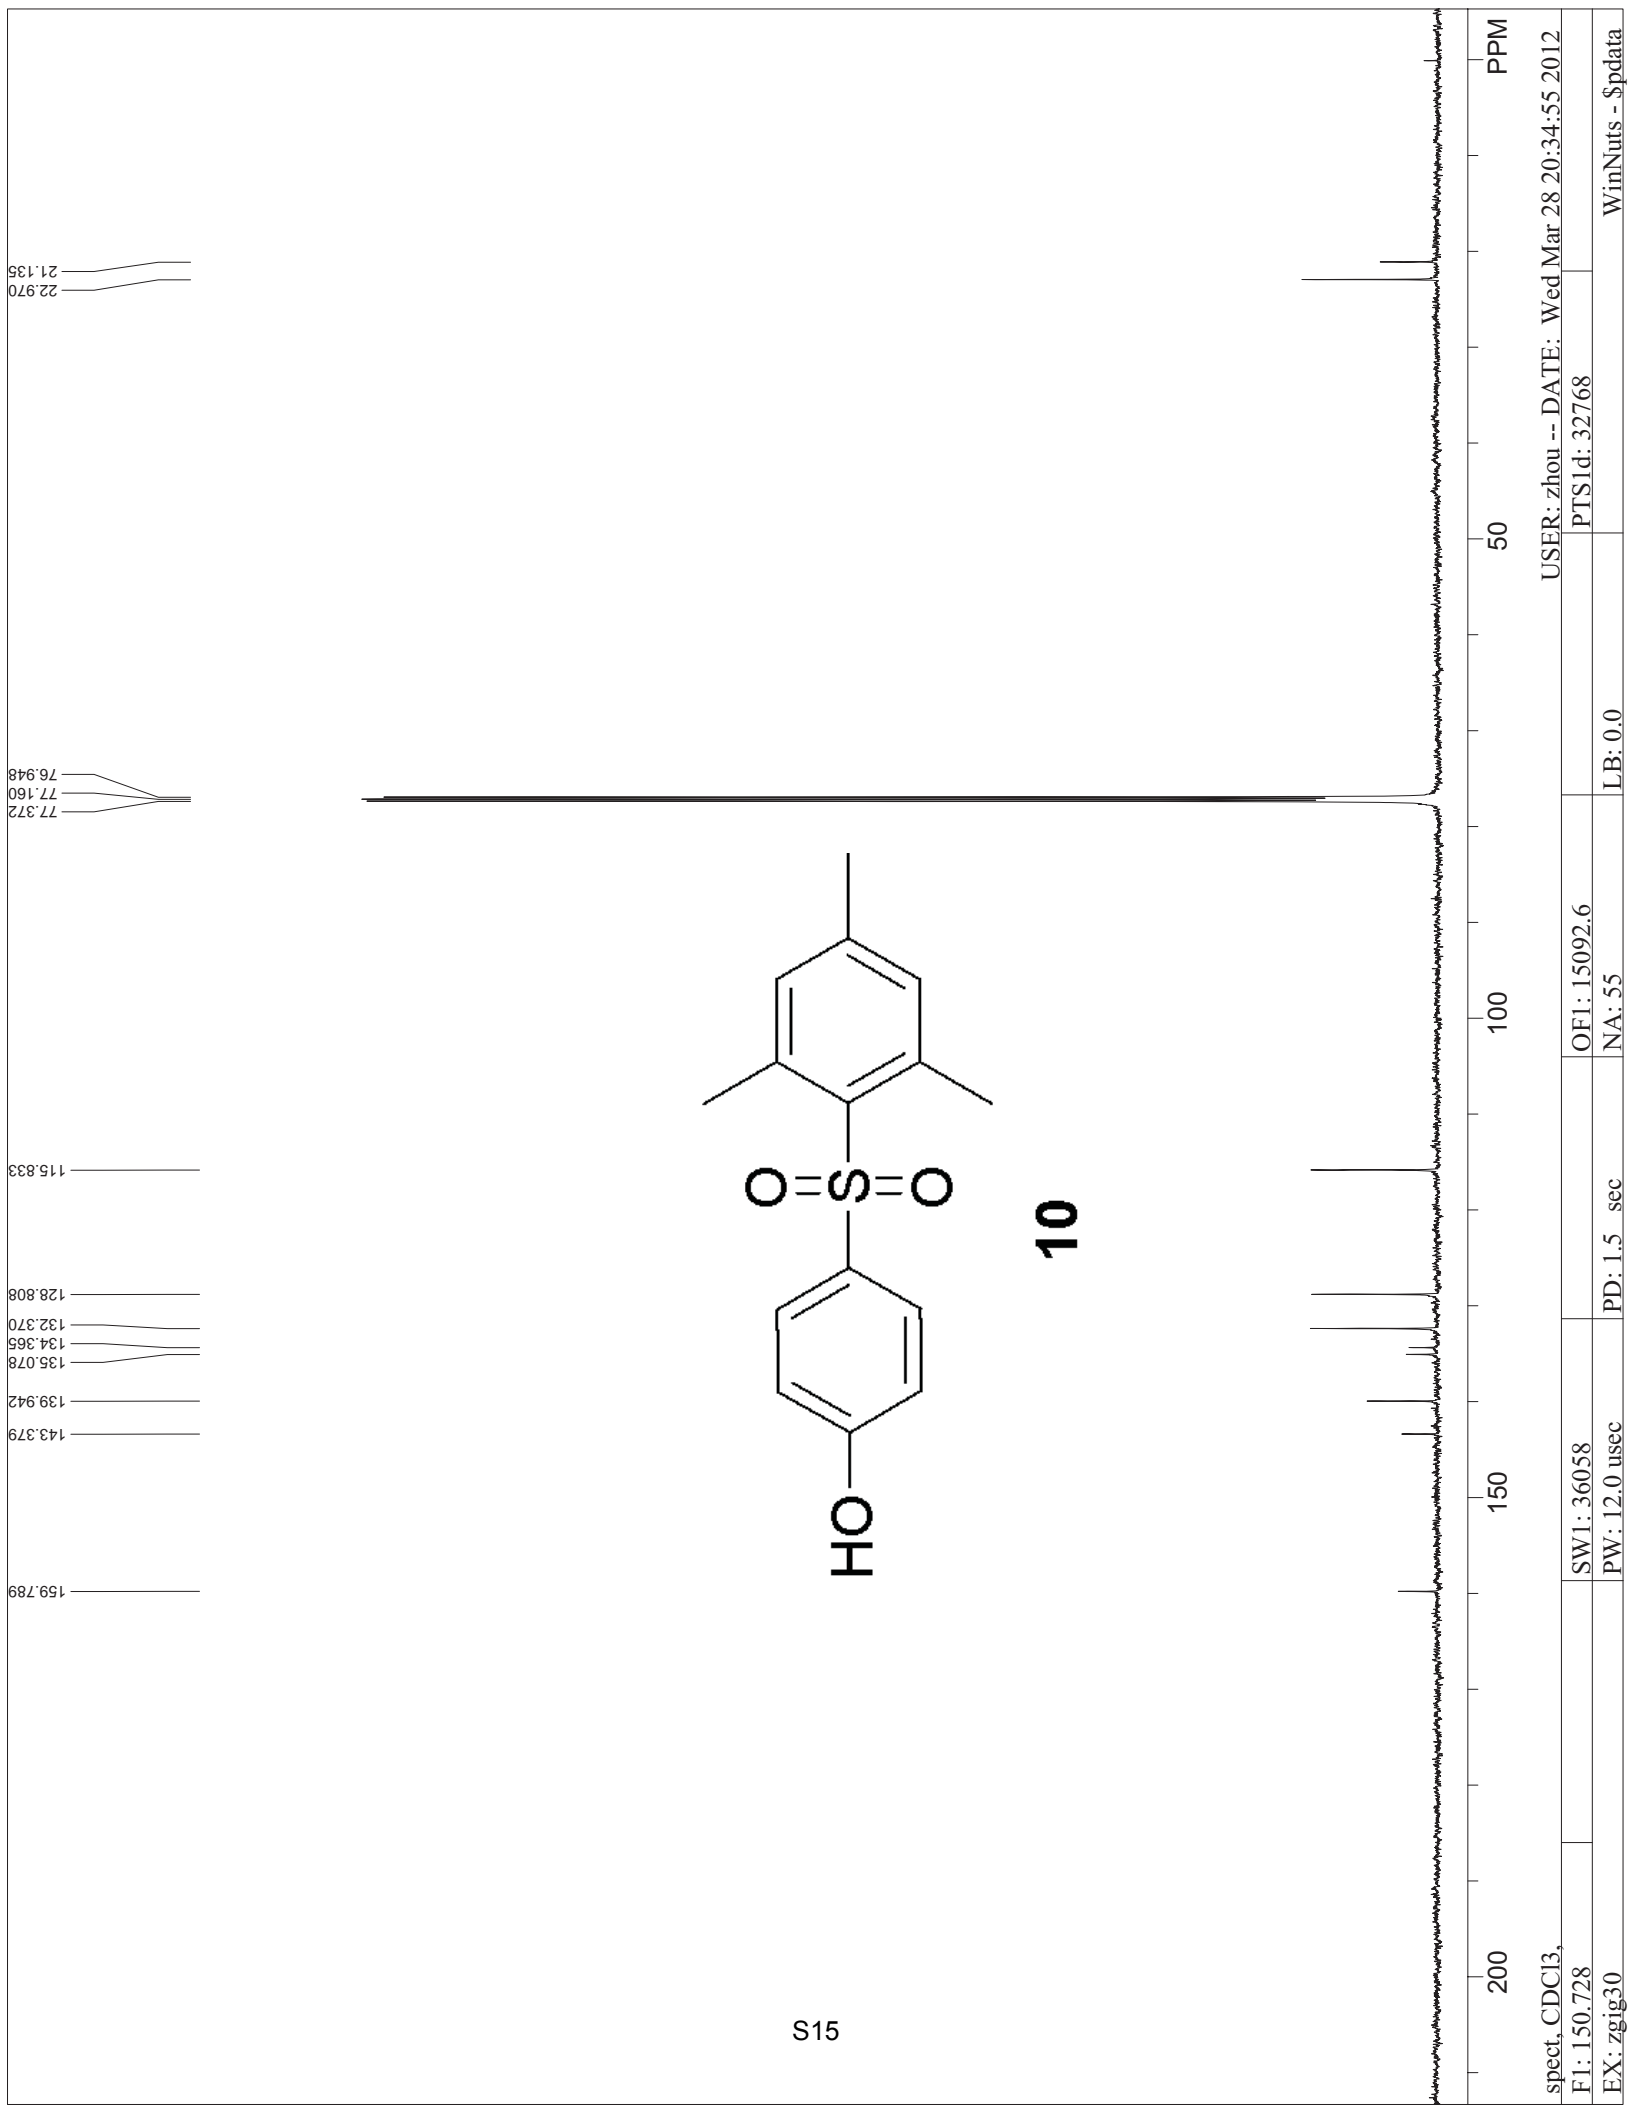

S15

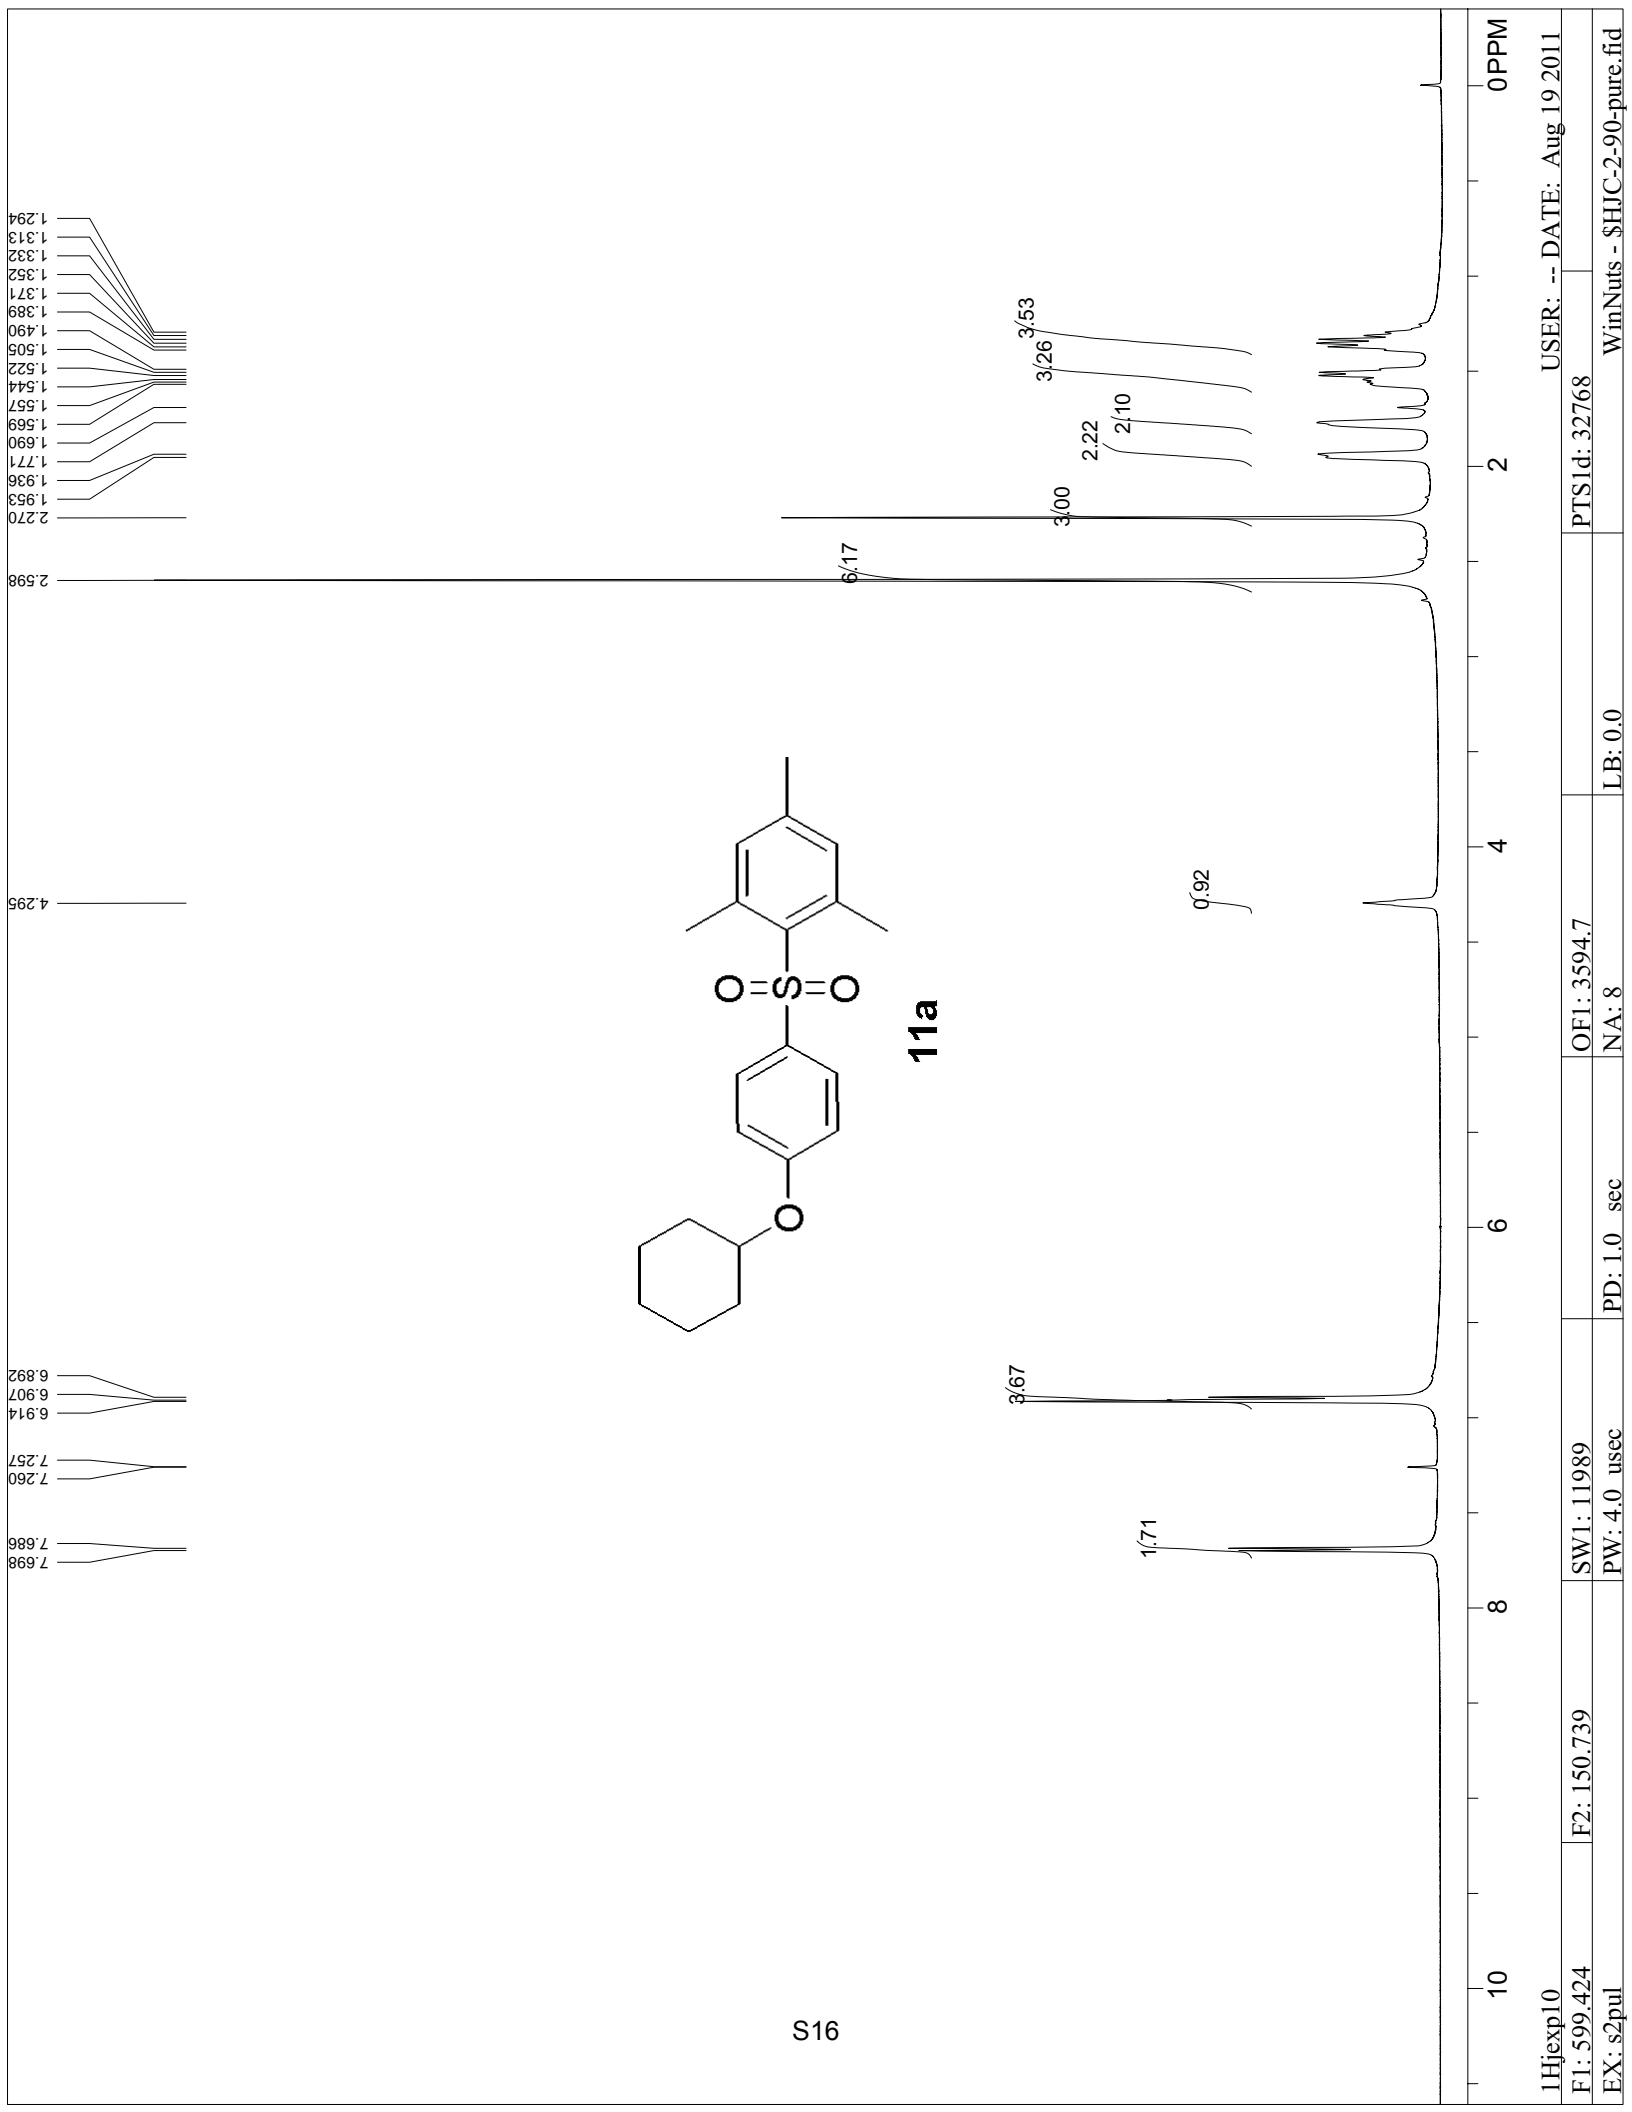



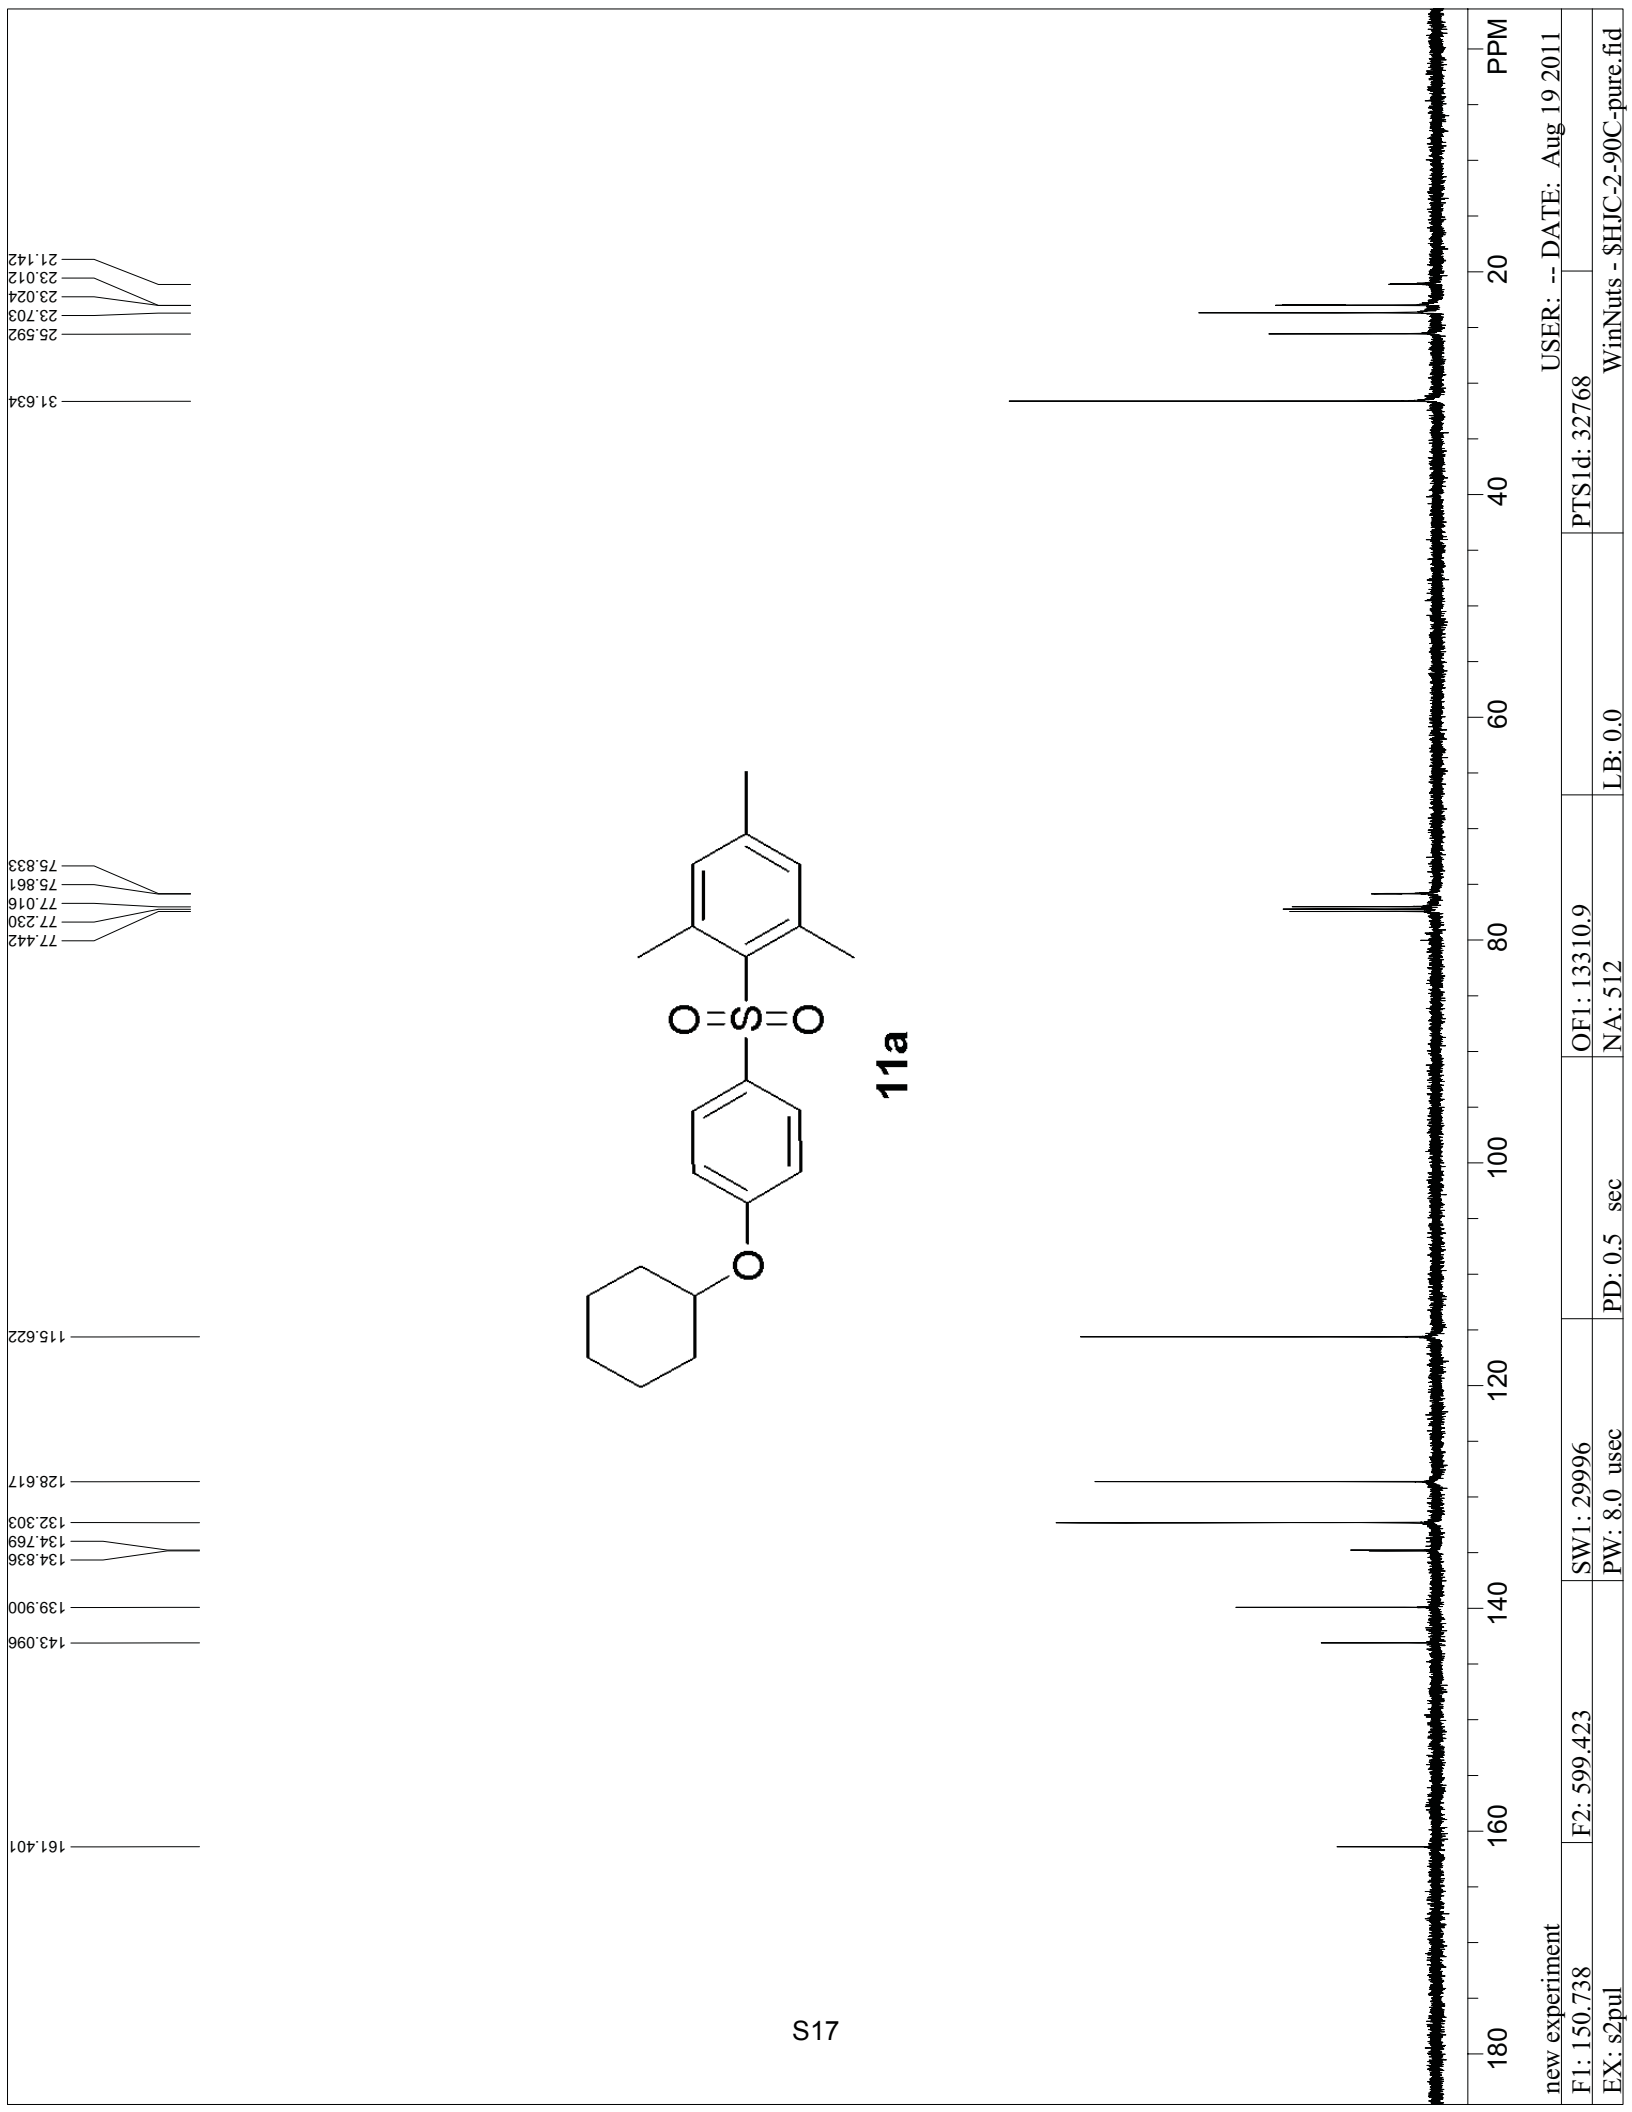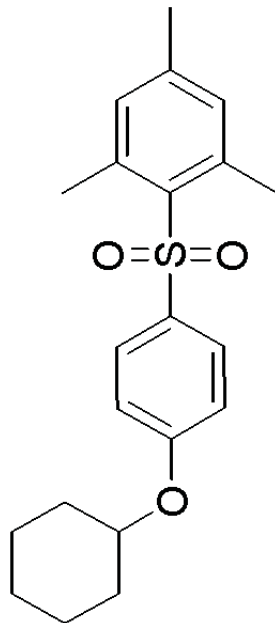

11a

new experiment

F1: 150.738

F2: 599.423

SW1: 29996

PW: 8.0 usec

OF1: 13310.9

LB: 0.0

PTS1d: 32768

USER: -- DATE: Aug 19 2011

WinNuts - \$HJC-2-90C-pure.fid

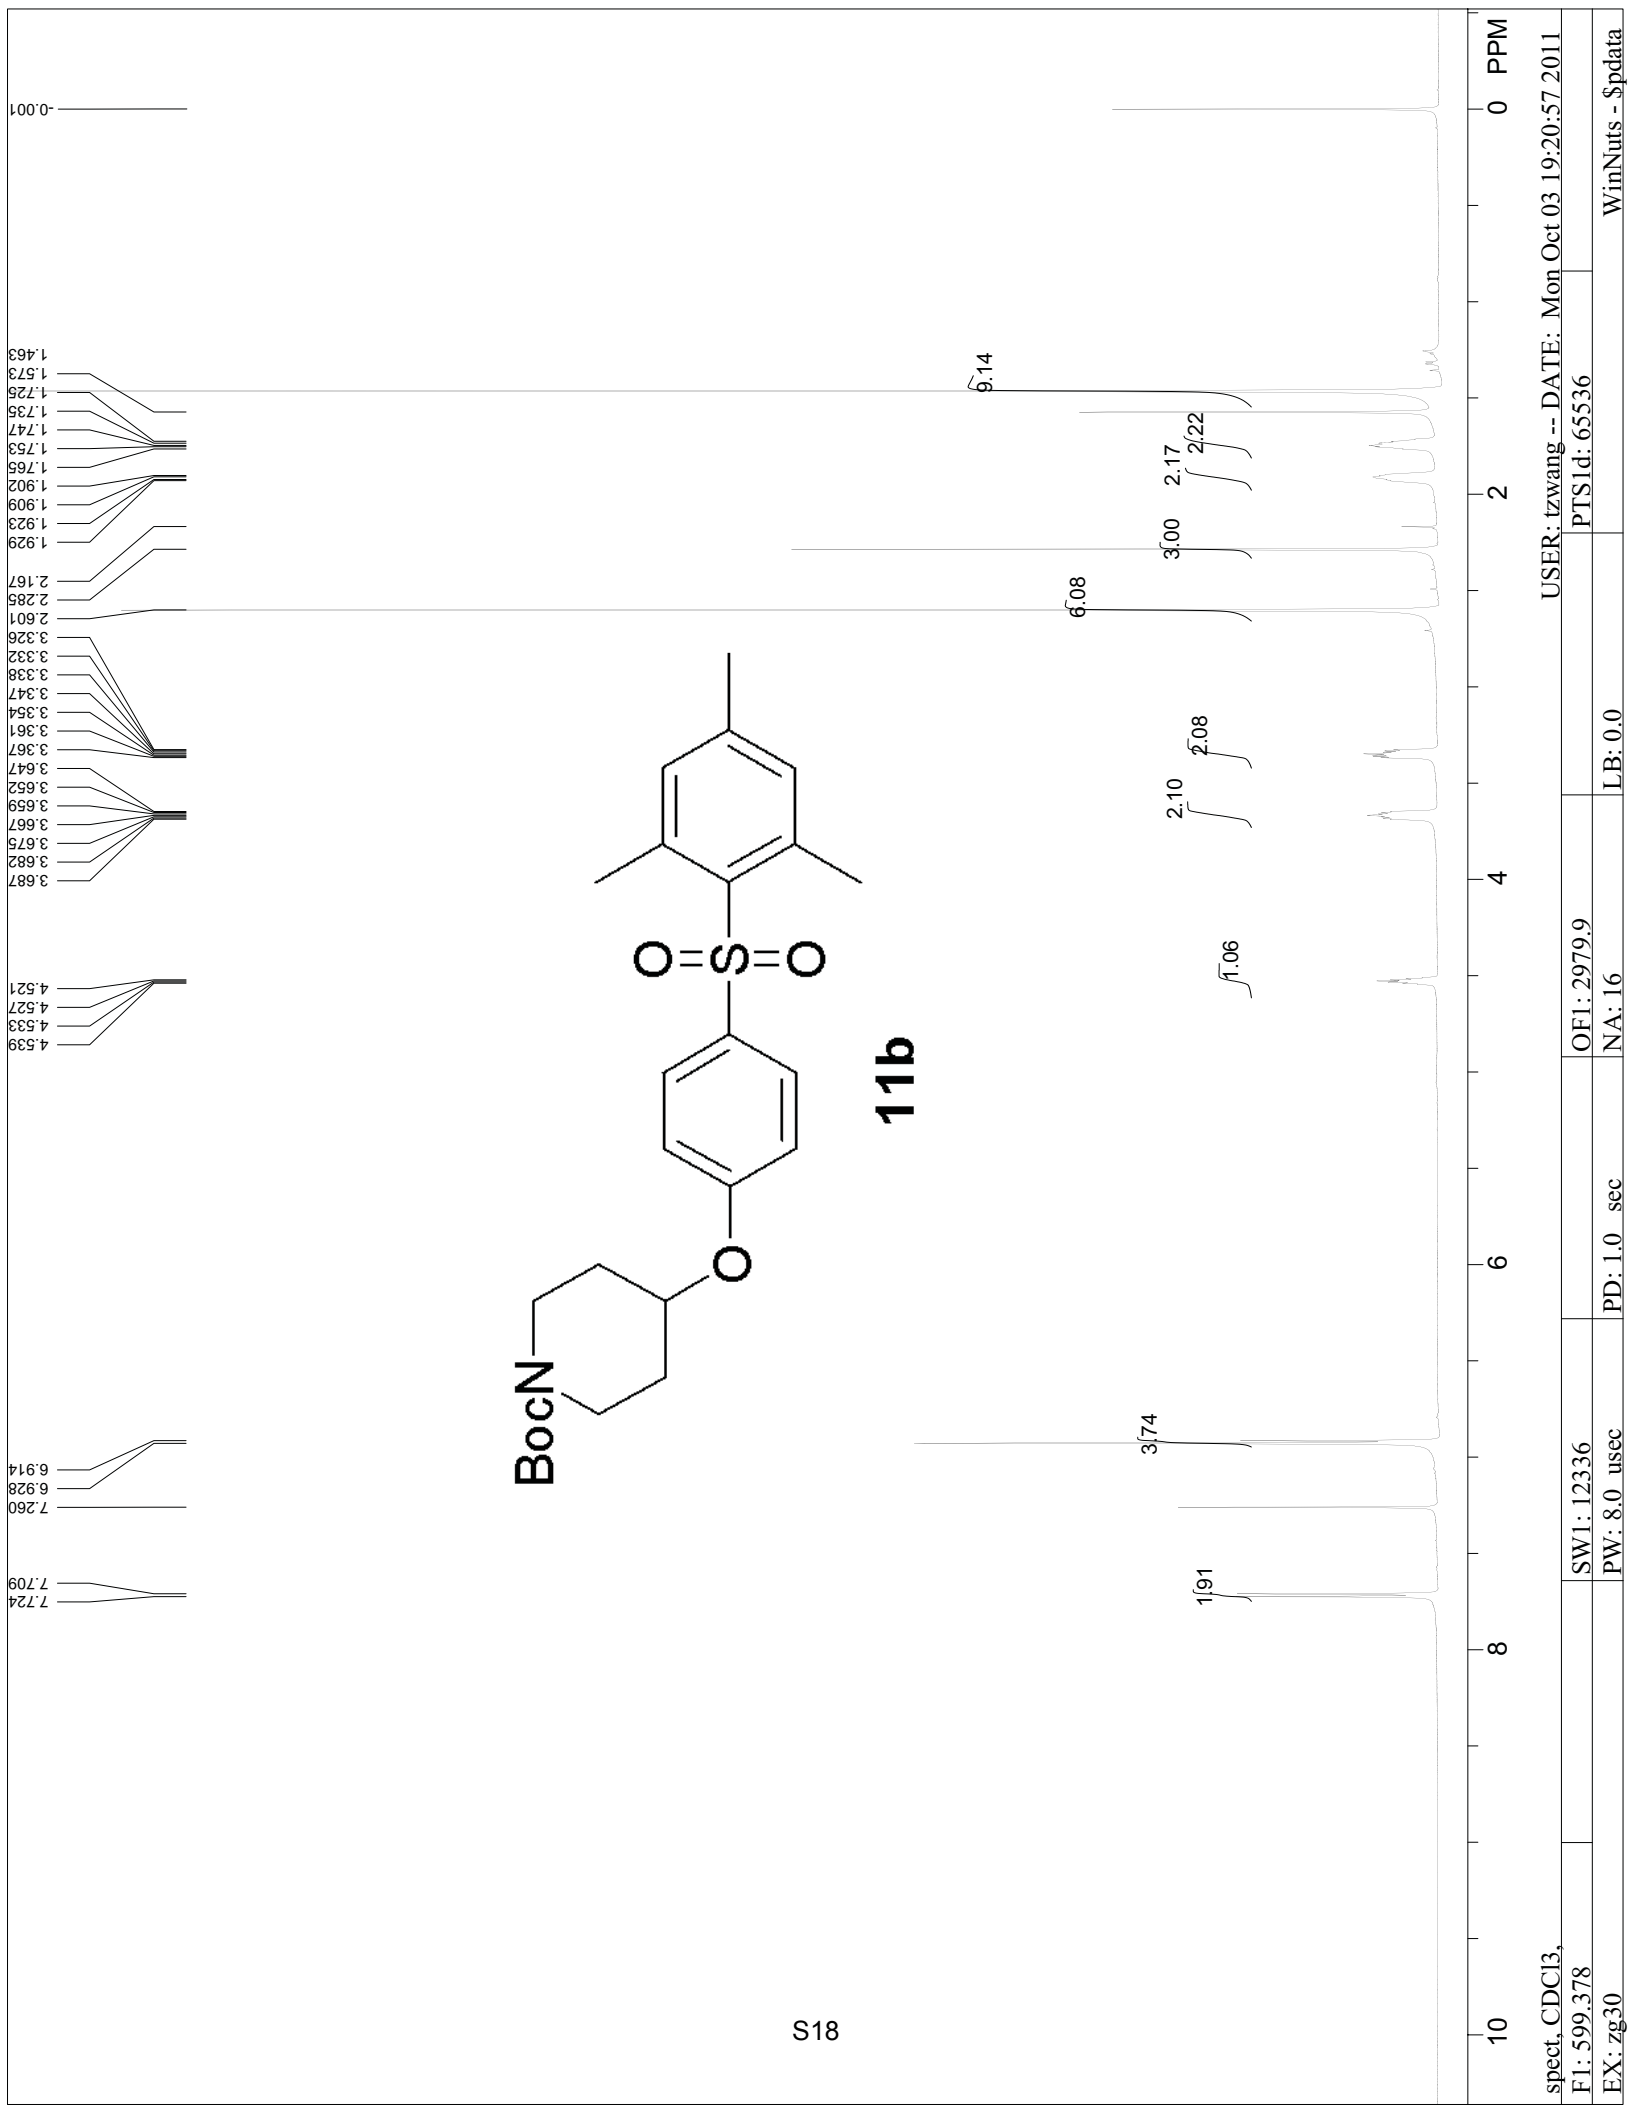

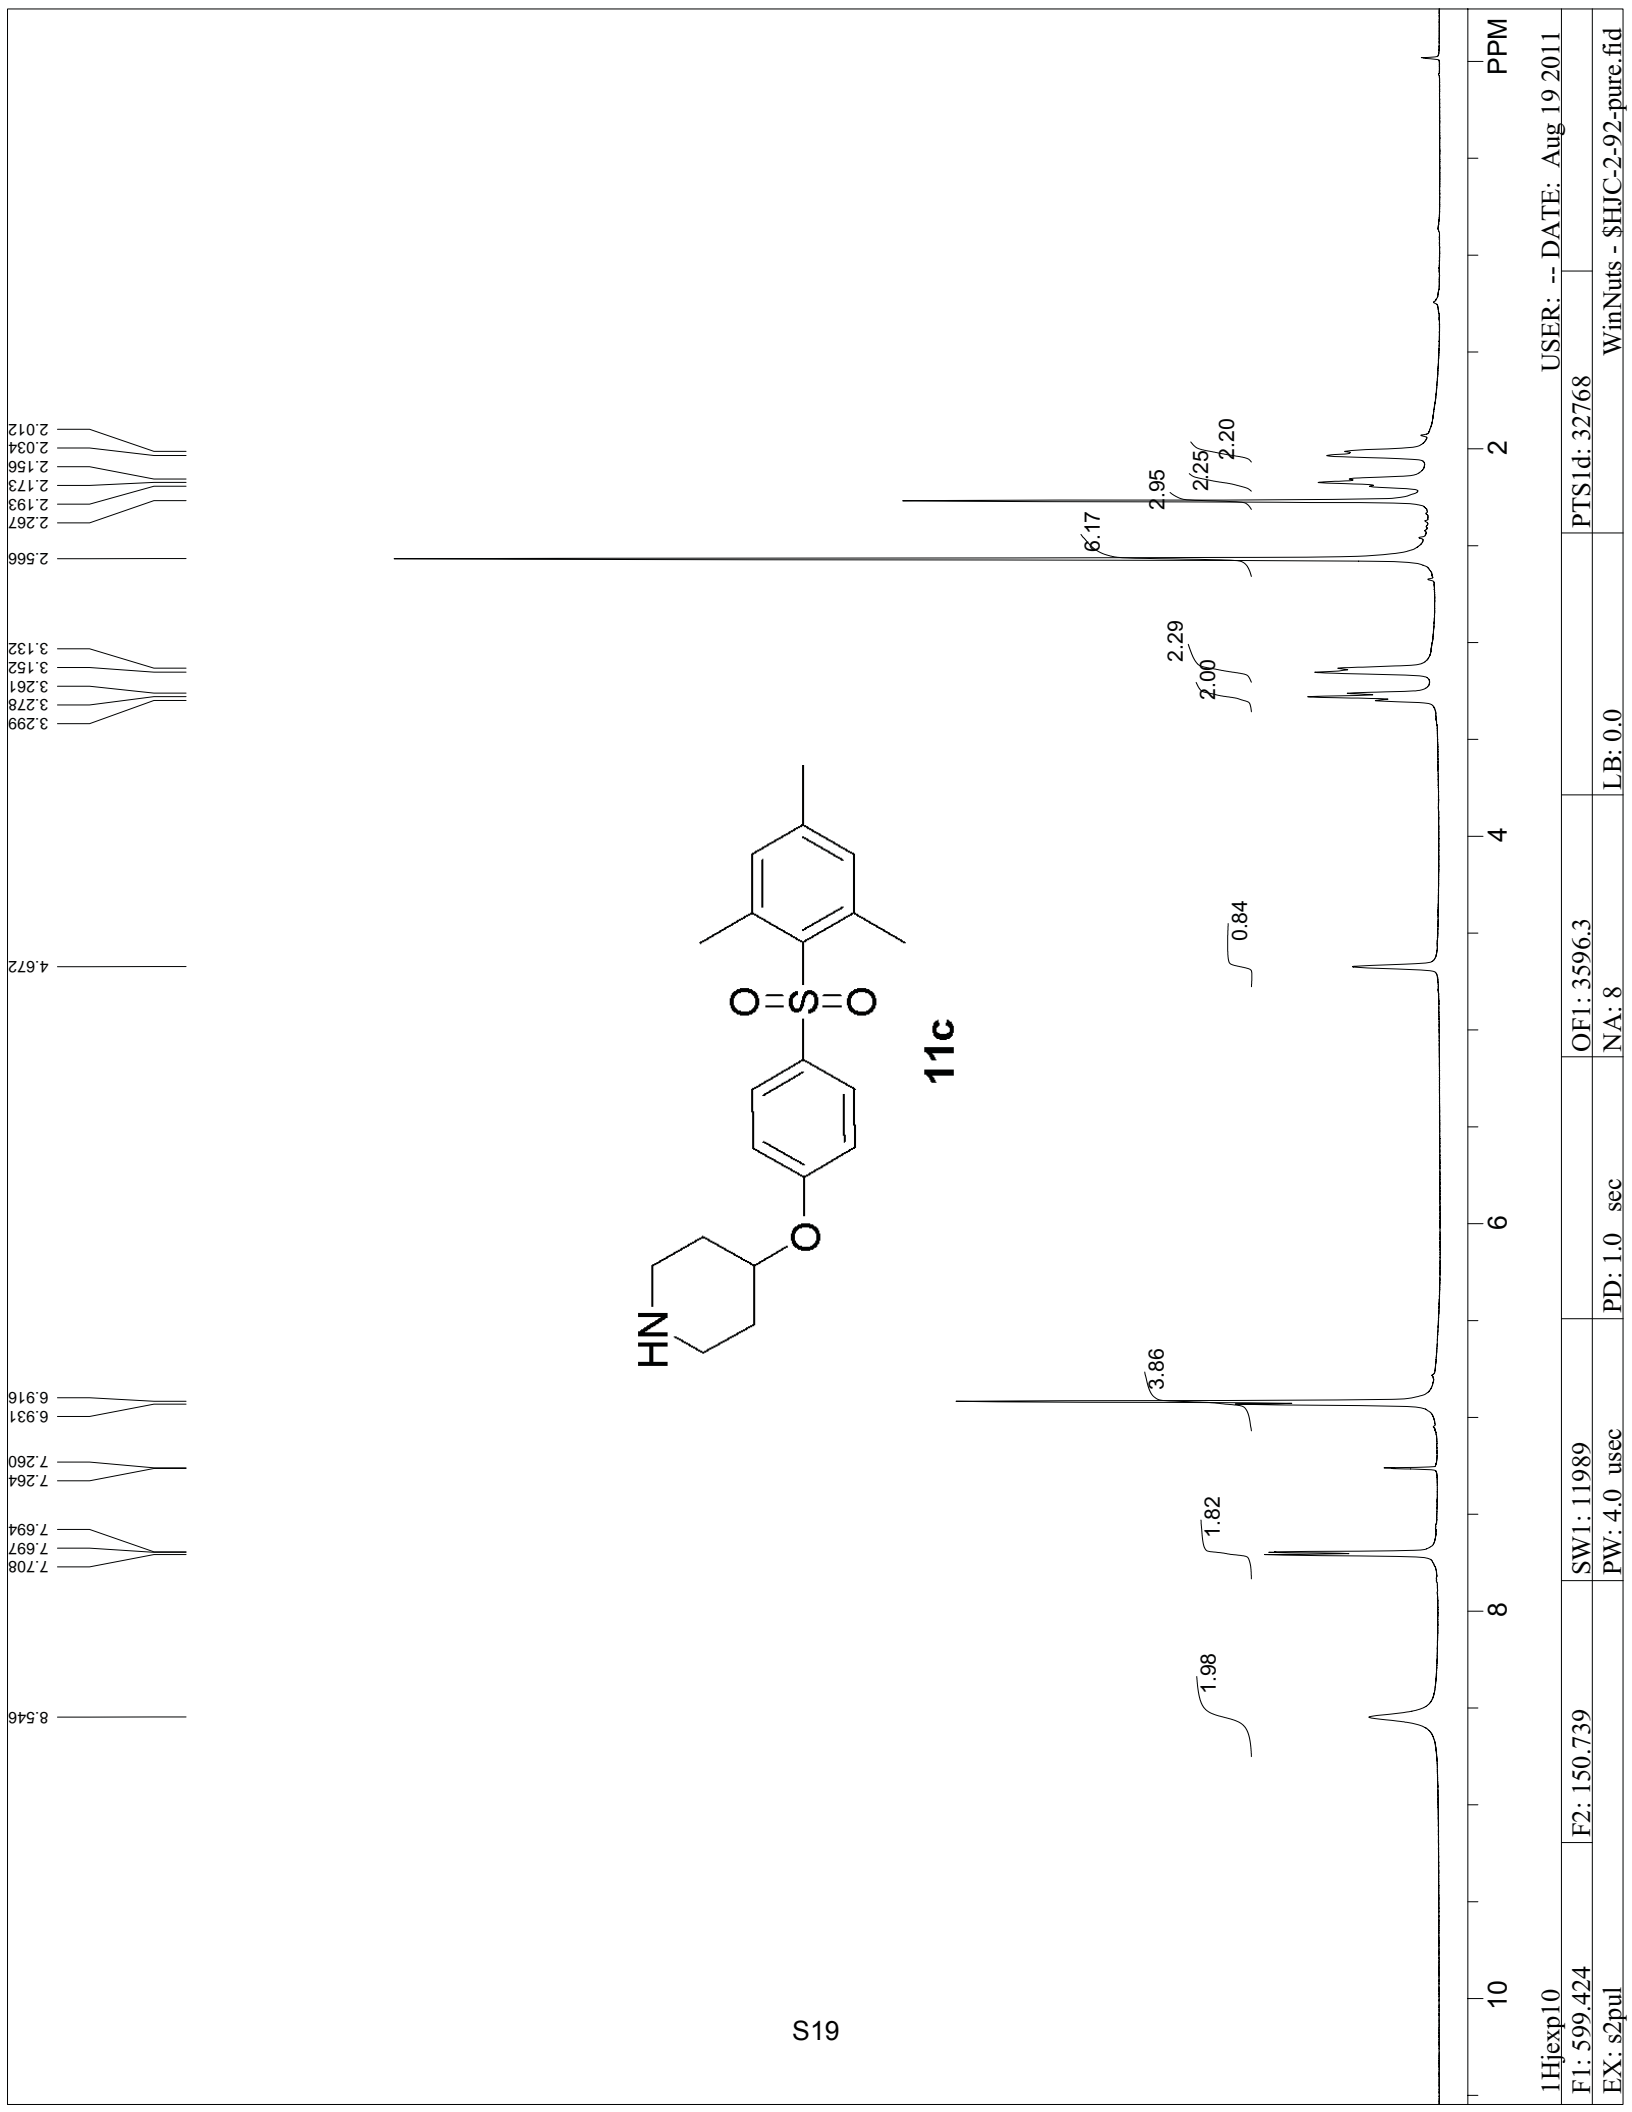

|             |              |             |              |                               |
|-------------|--------------|-------------|--------------|-------------------------------|
| 1Hjexp10    | SW1: 11989   | OF1: 3596.3 | PTS1d: 32768 | USER: -- DATE: Aug 19 2011    |
| F1: 599.424 | F2: 150.739  | NA: 8       | LB: 0.0      | WinNuts - \$HJC-2-92-pure.fid |
| EX: s2pul   | PW: 4.0 usec | PD: 1.0 sec |              |                               |

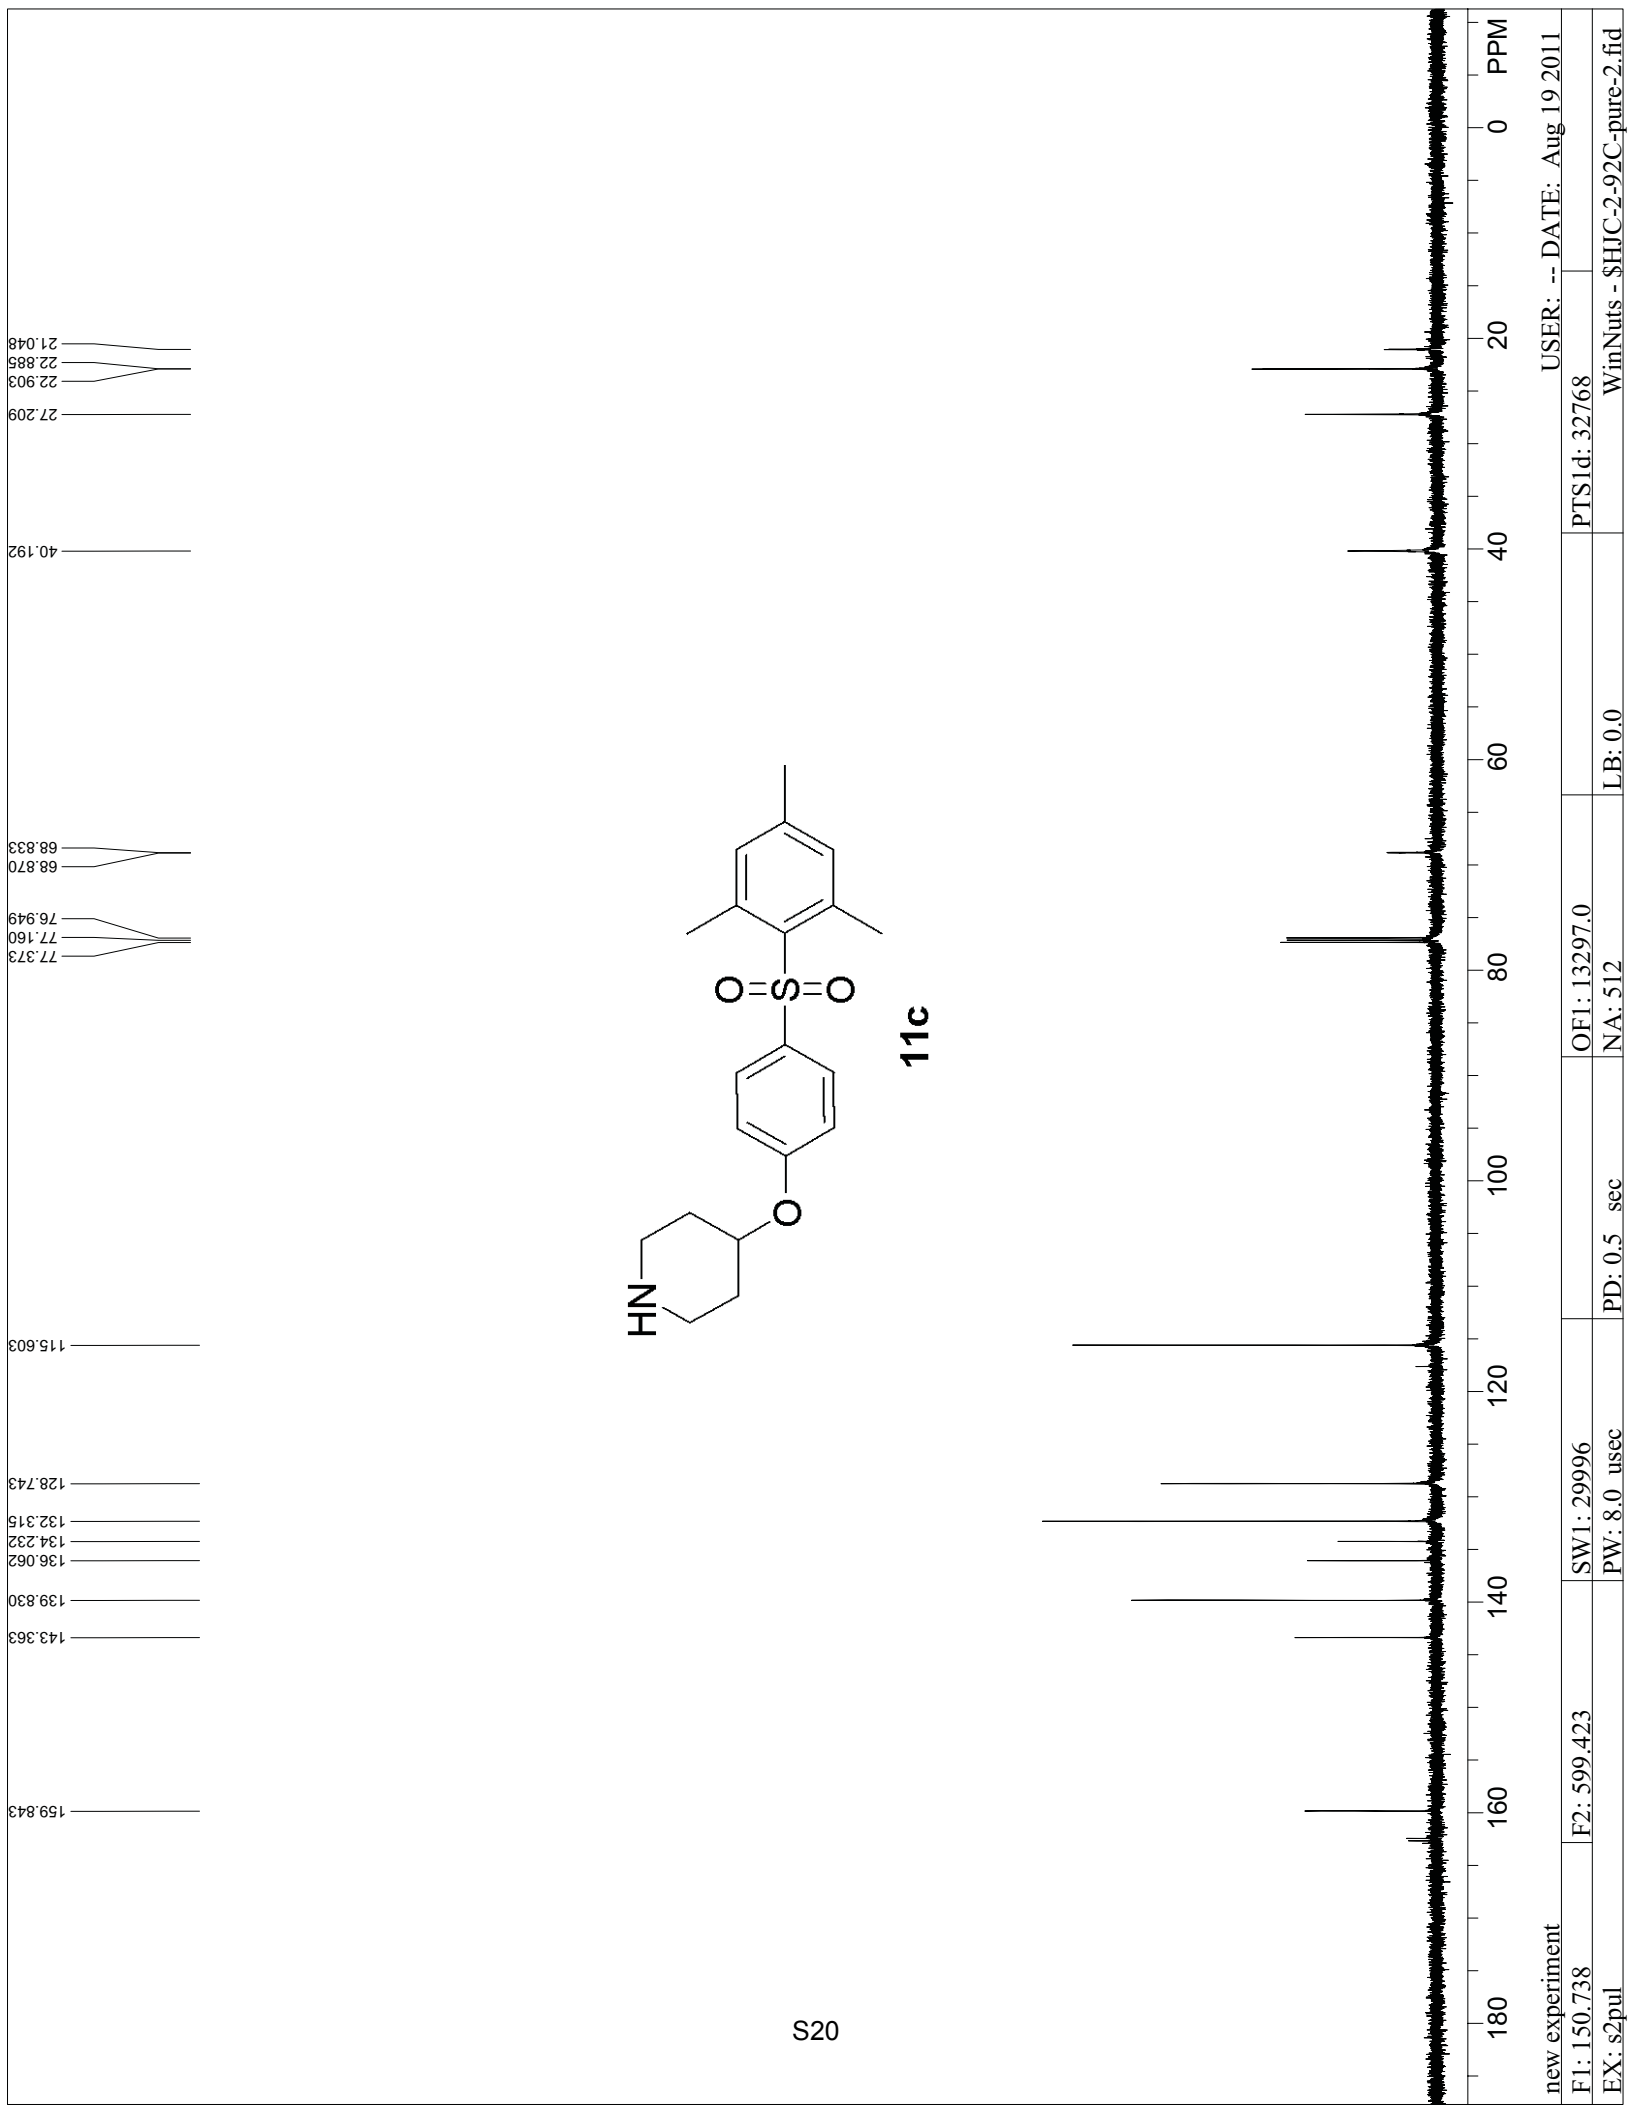

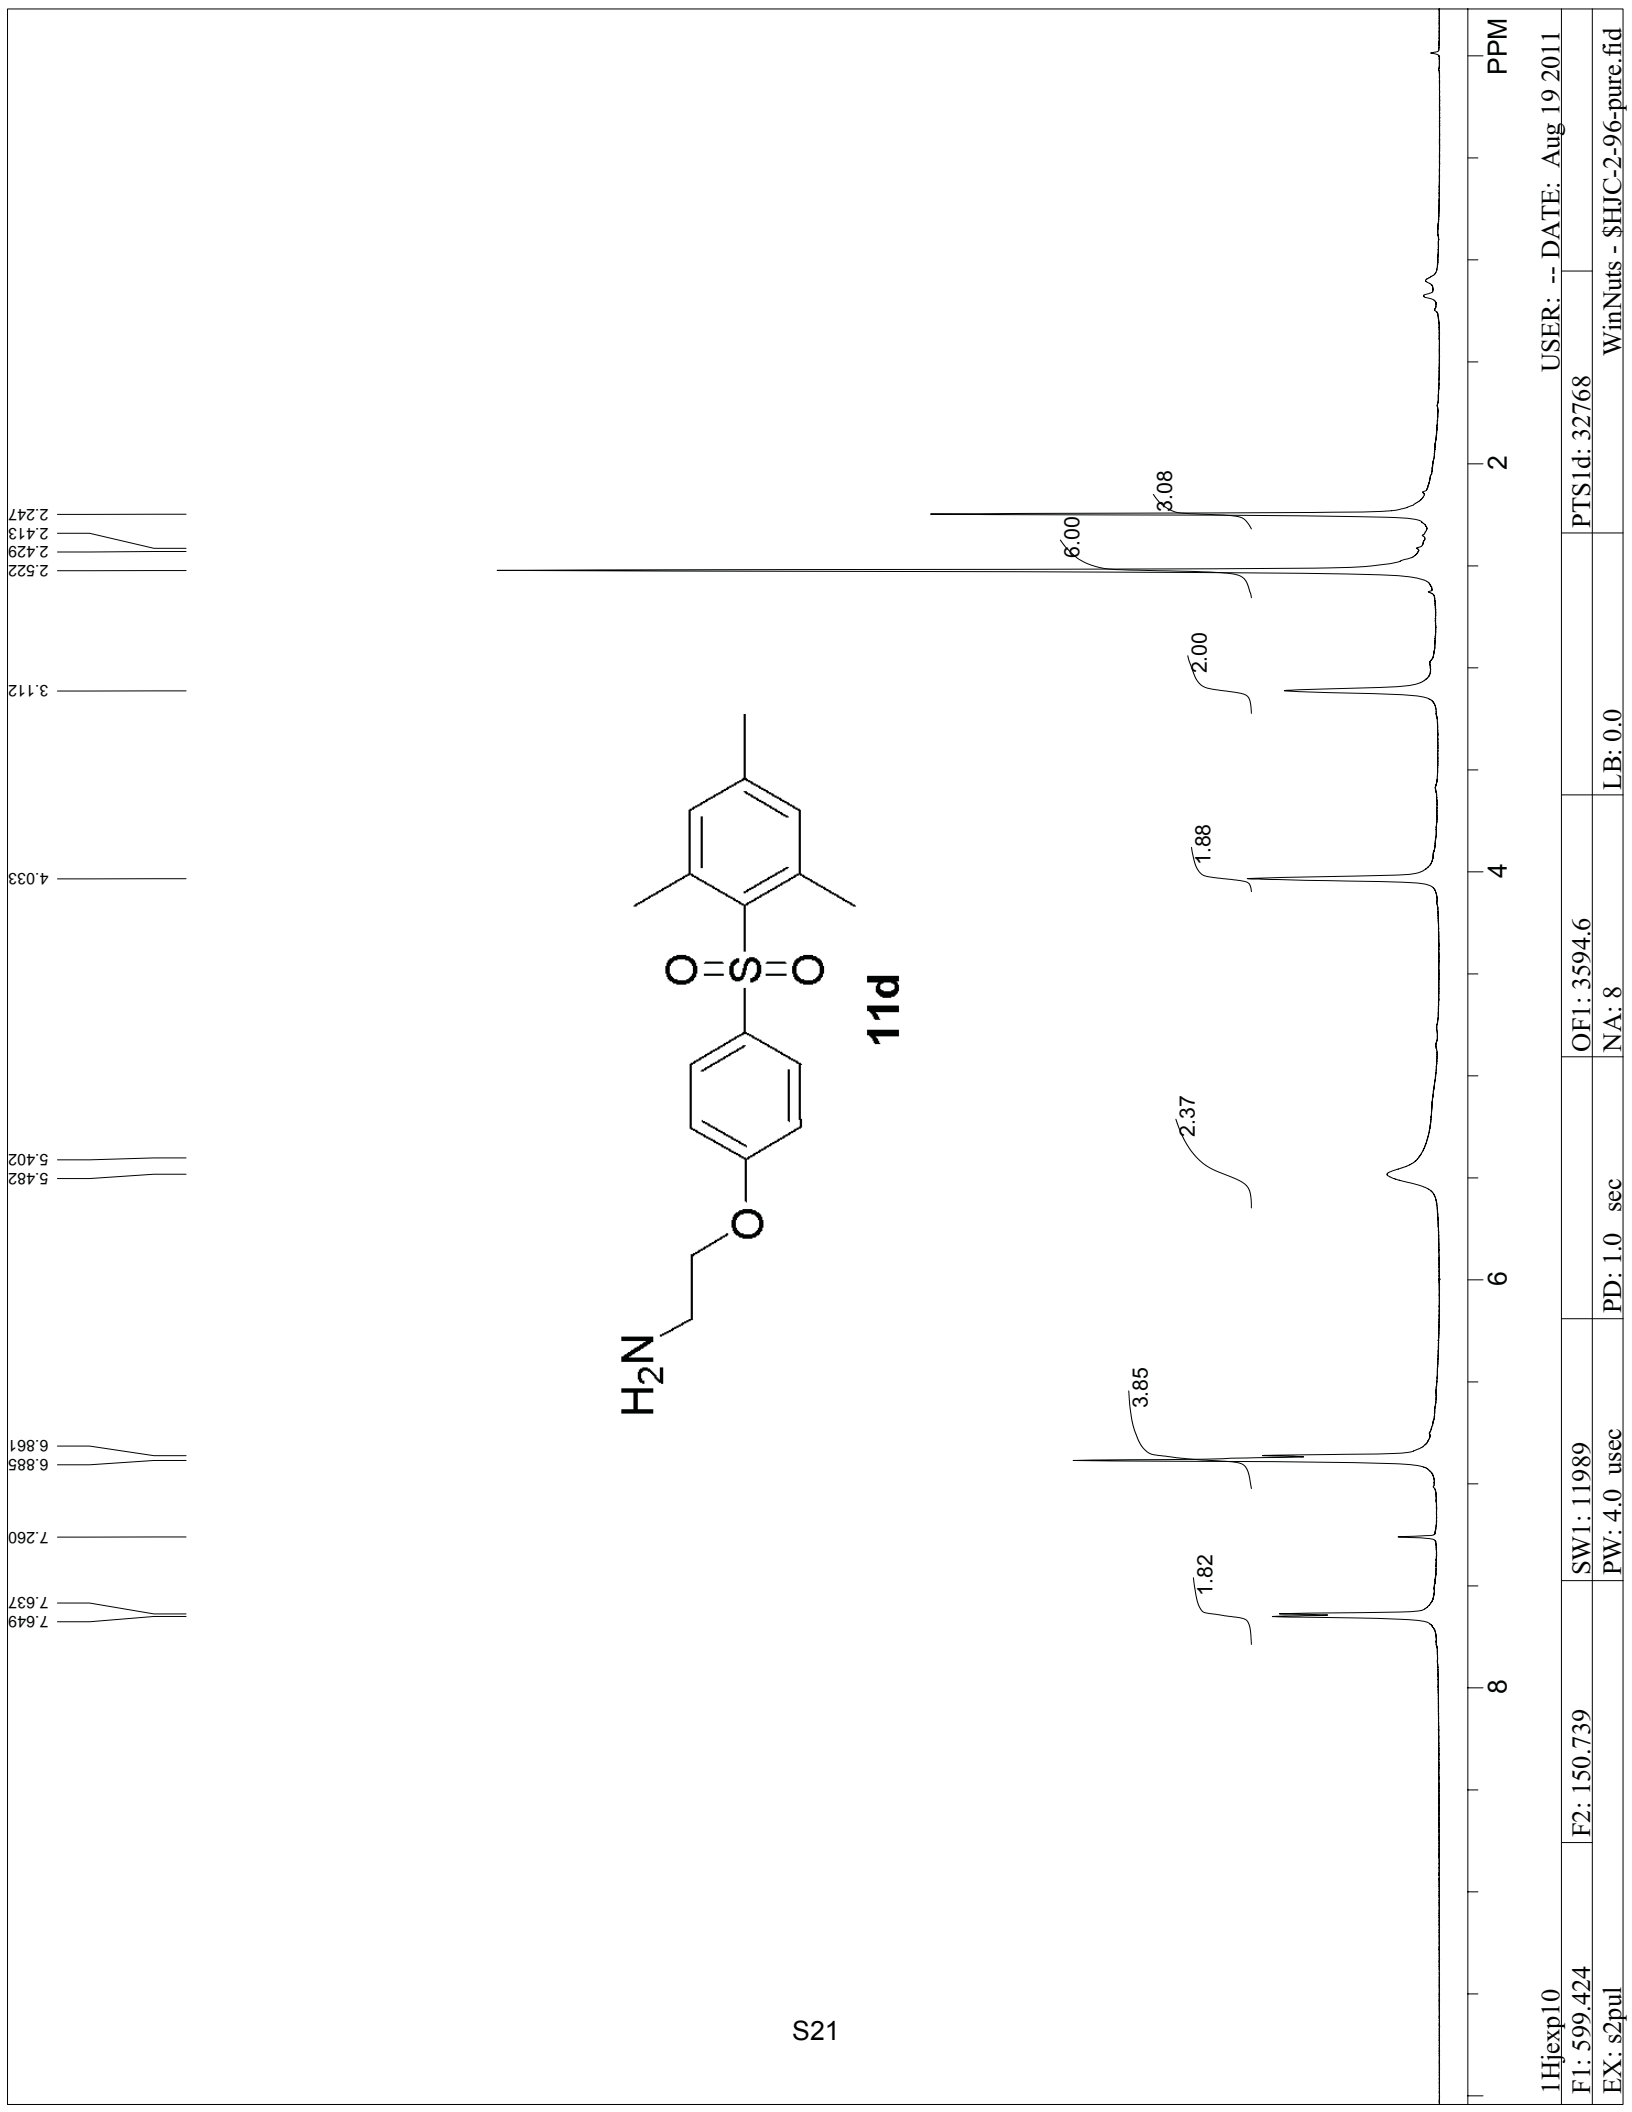

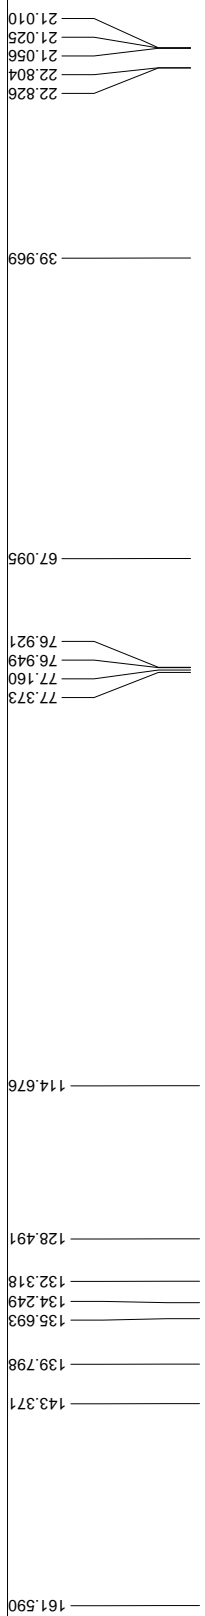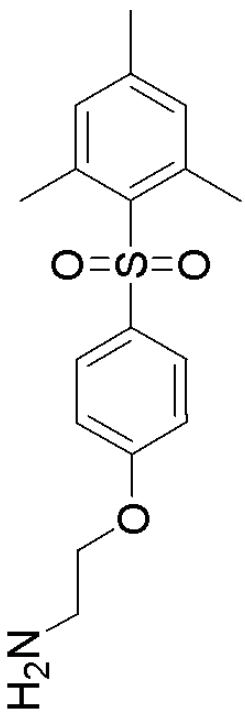

11d

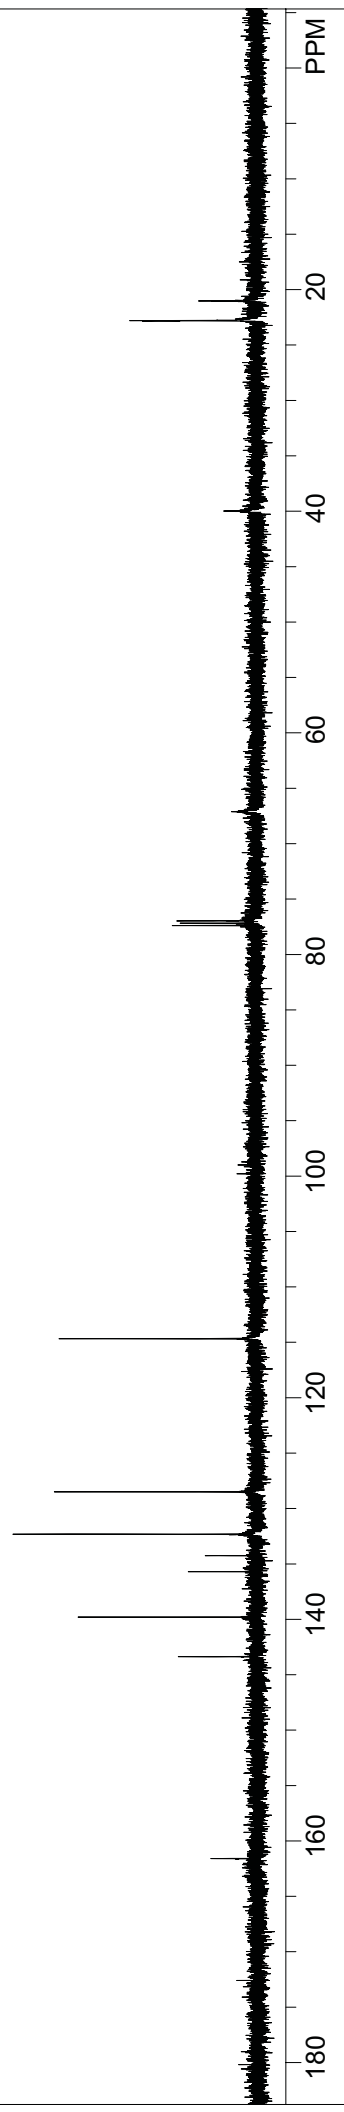

|                |              |                            |                                  |
|----------------|--------------|----------------------------|----------------------------------|
| new experiment |              | USER: -- DATE: Aug 19 2011 |                                  |
| F1: 150.738    | F2: 599.423  | PTS1d: 32768               | WinNuts - \$HIC-2-96C-pure-2.fid |
| EX: s2pul      | SW1: 29996   | OF1: 13301.1               | LB: 0.0                          |
|                | PW: 8.0 usec | PD: 0.5 sec                | NA: 256                          |

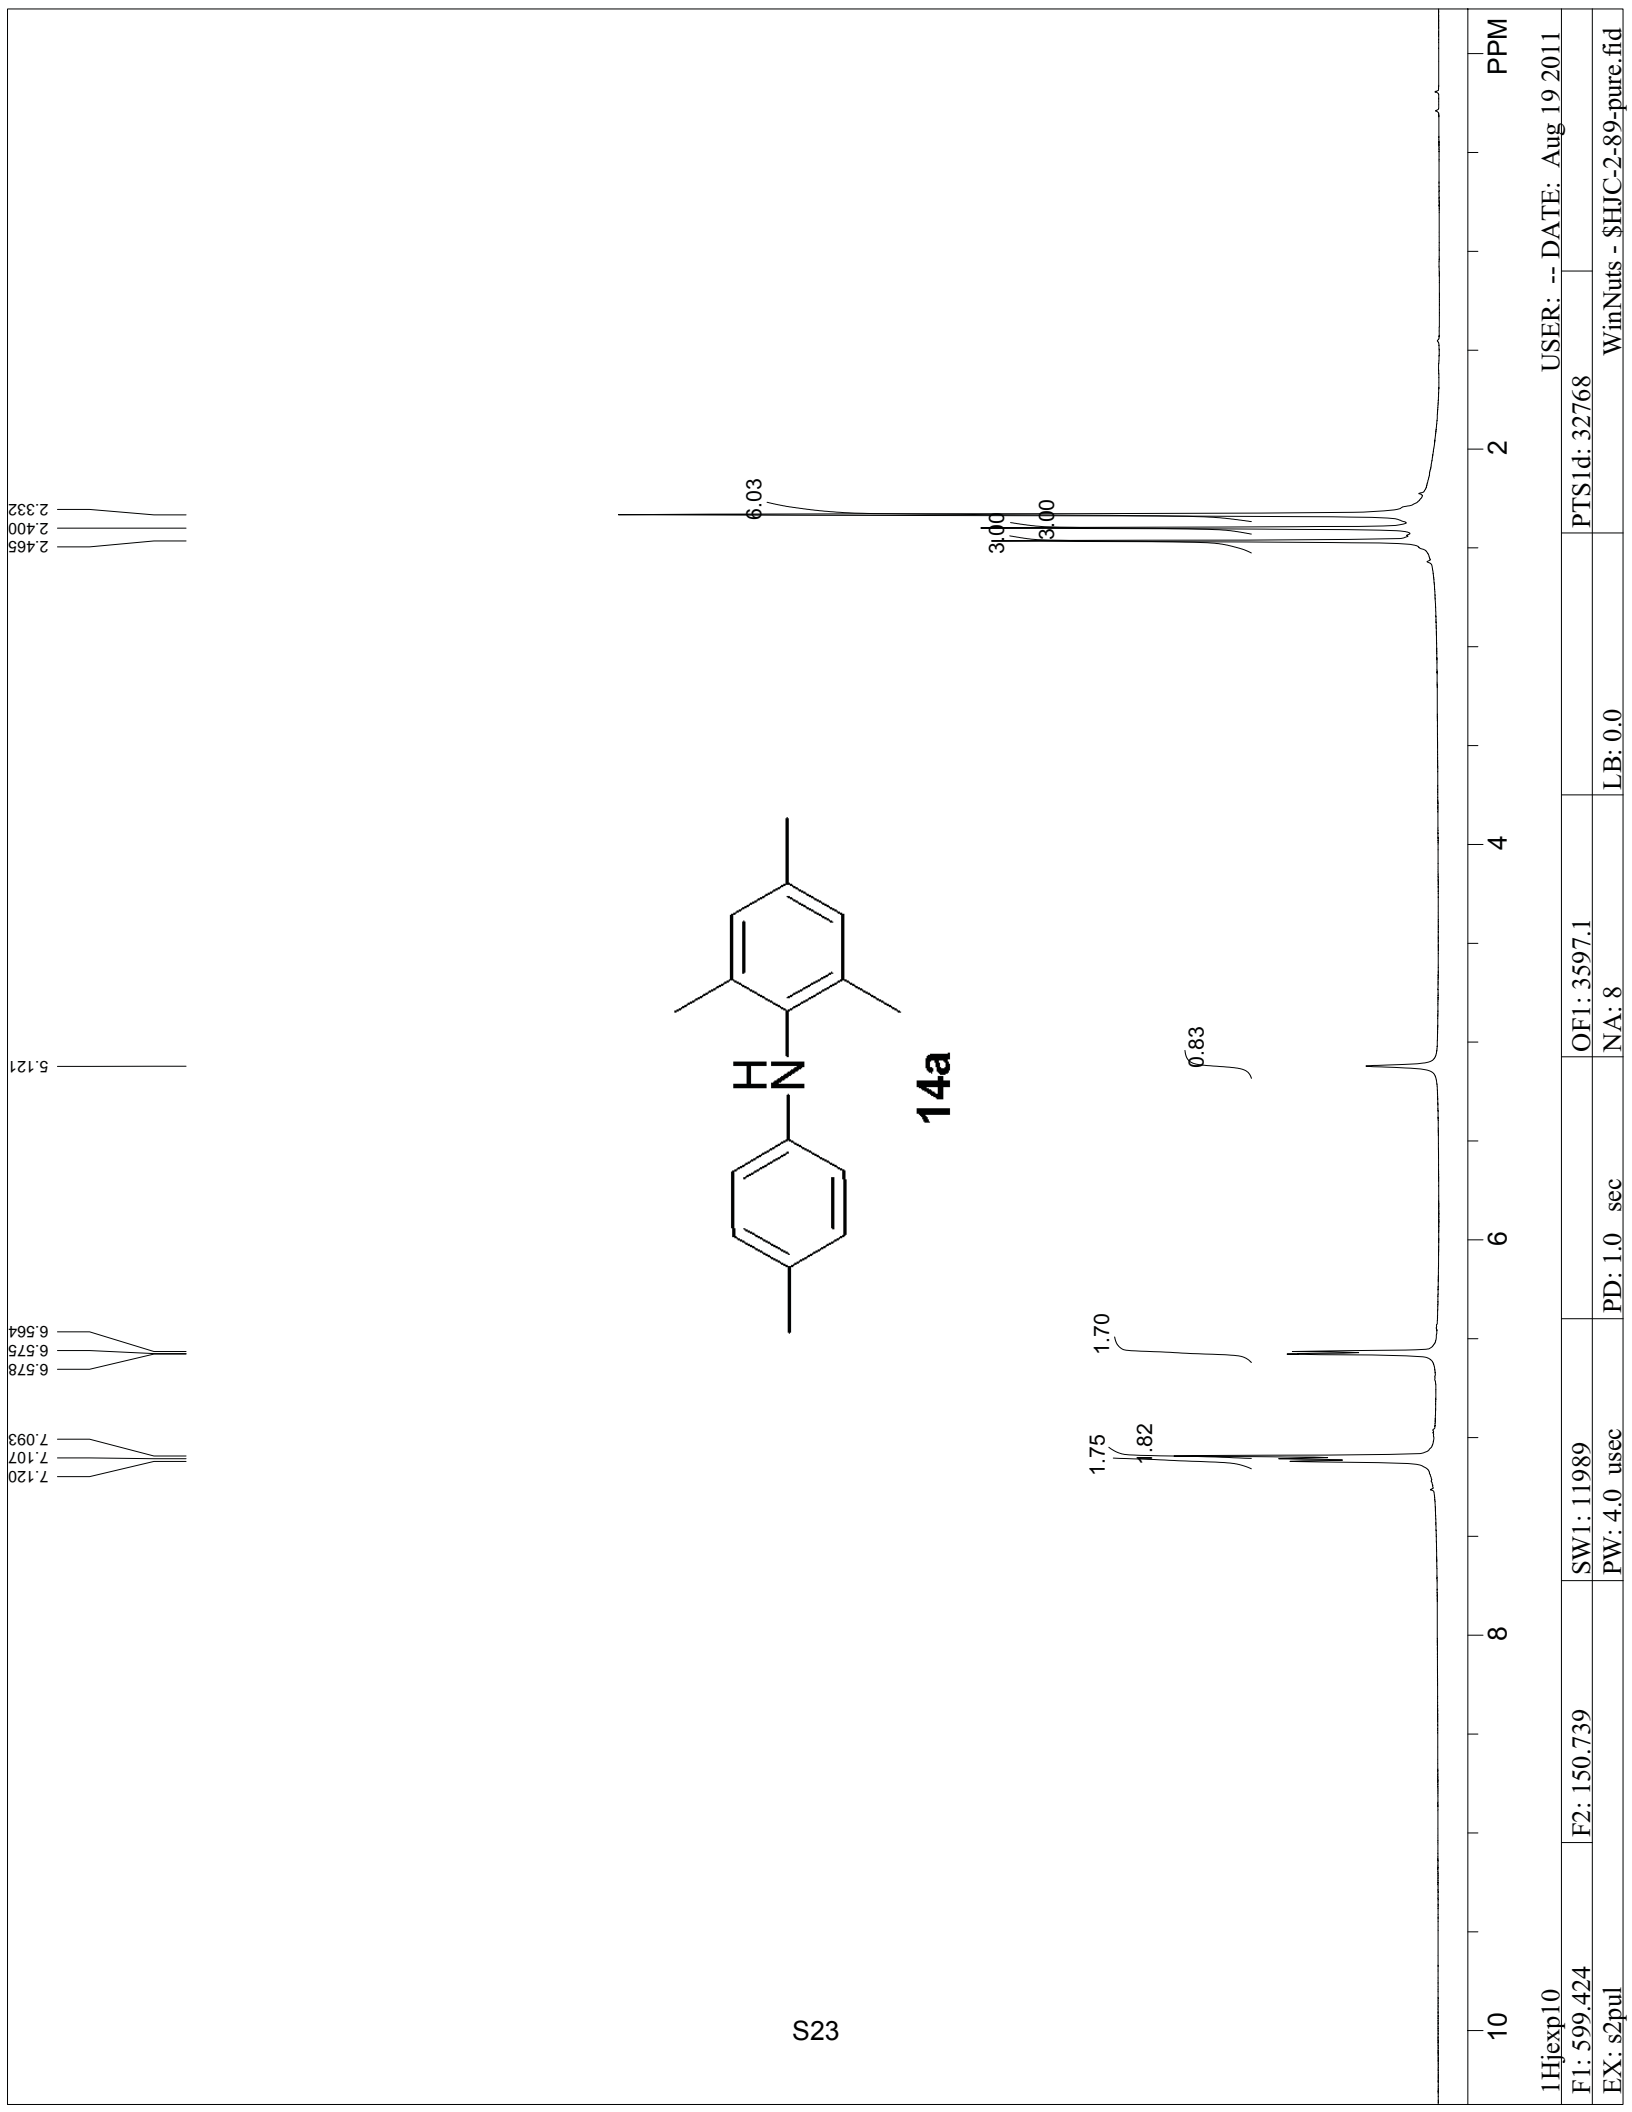

1Hjexp10

F1: 599.424

F2: 150.739

SW1: 11989

PD: 1.0 sec

OF1: 3597.1

LB: 0.0

PTS1d: 32768

USER: -- DATE: Aug 19 2011

WinNuts - \$HJC-2-89-pure.fid

20.979  
20.519  
18.311

144.370  
136.063  
135.732  
135.099  
129.814  
129.279  
127.112  
113.505

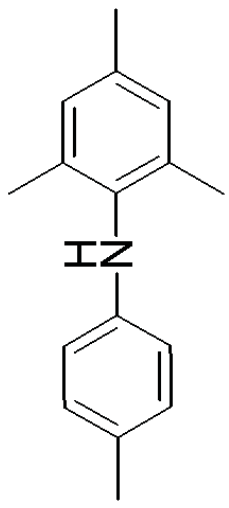

**14a**

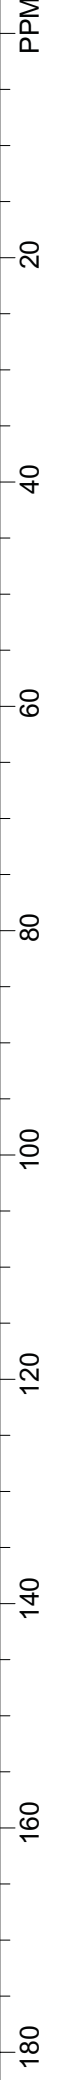

|             |                                |
|-------------|--------------------------------|
| Std carbon  | USER: -- DATE: Aug 19 2011     |
| F1: 150.738 | PTS1d: 32768                   |
| F2: 599.423 | OF1: 13275.2                   |
| EX: s2pul   | PD: 1.0 sec                    |
|             | NA: 256                        |
|             | LB: 0.0                        |
|             | WinNuts - \$HJC-2-89C-pure.fid |



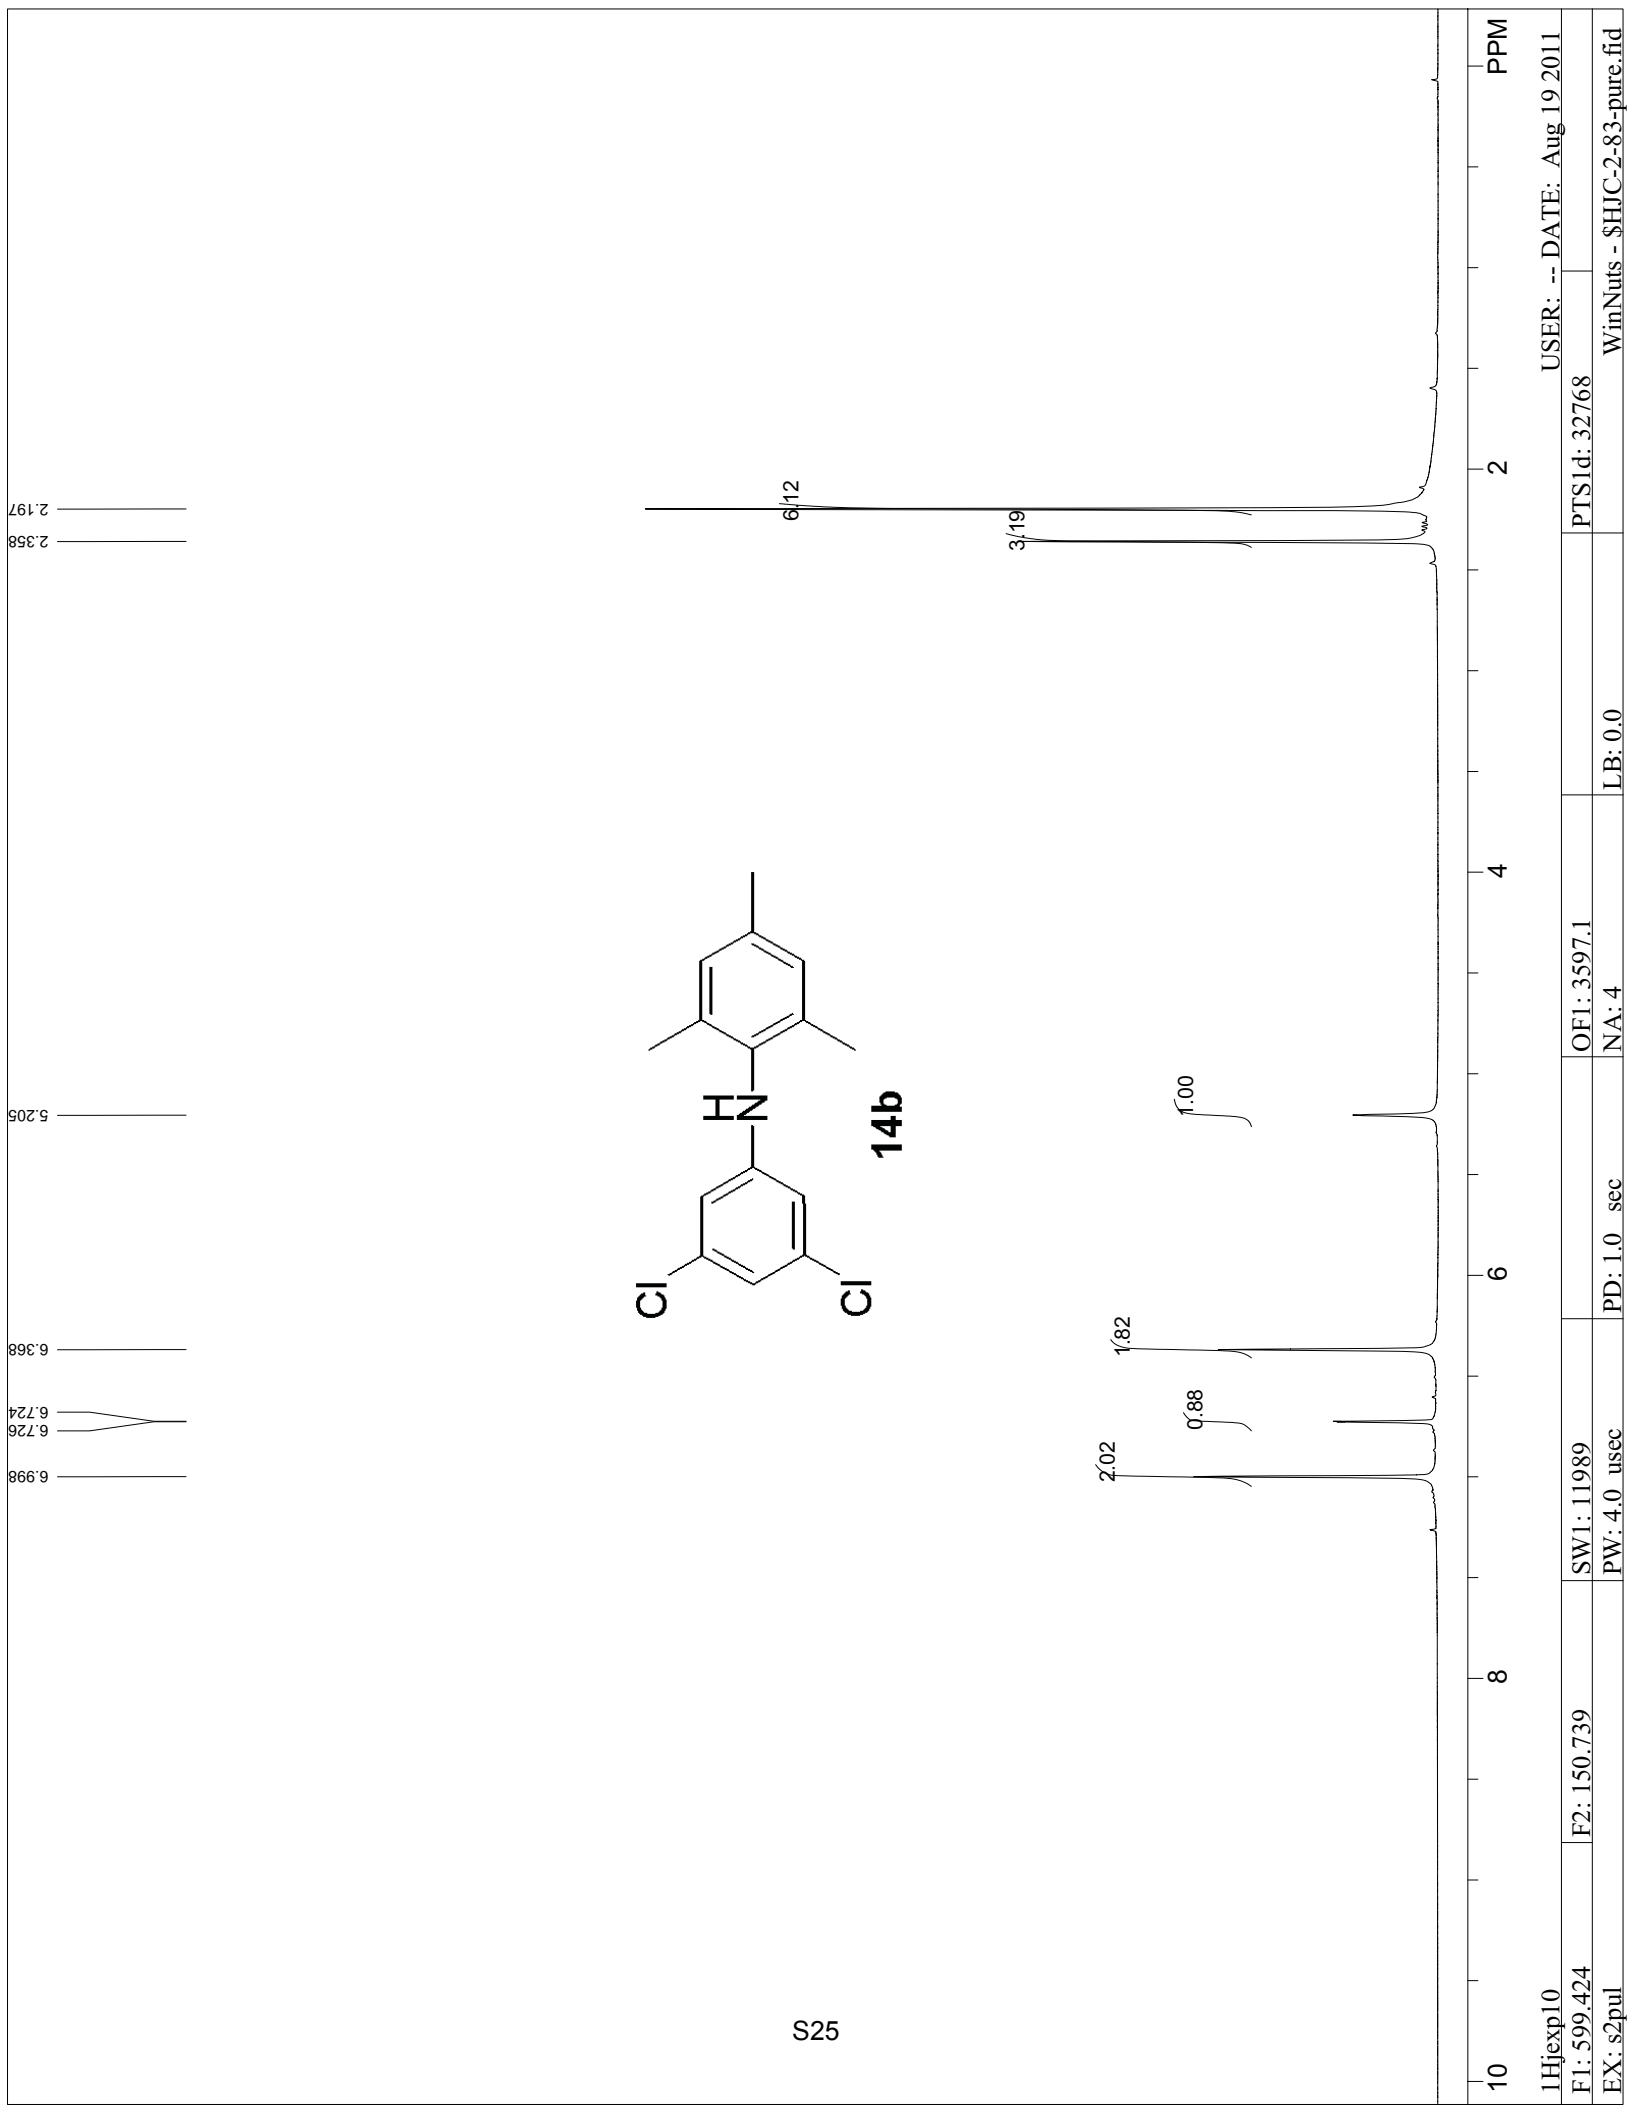

USER: -- DATE: Aug 19 2011

PTS1d: 32768

OF1: 3597.1

NA: 4

PD: 1.0 sec

SW1: 11989

F2: 150.739

EX: s2pul

LB: 0.0

WinNuts - \$HJC-2-83-pure.fid

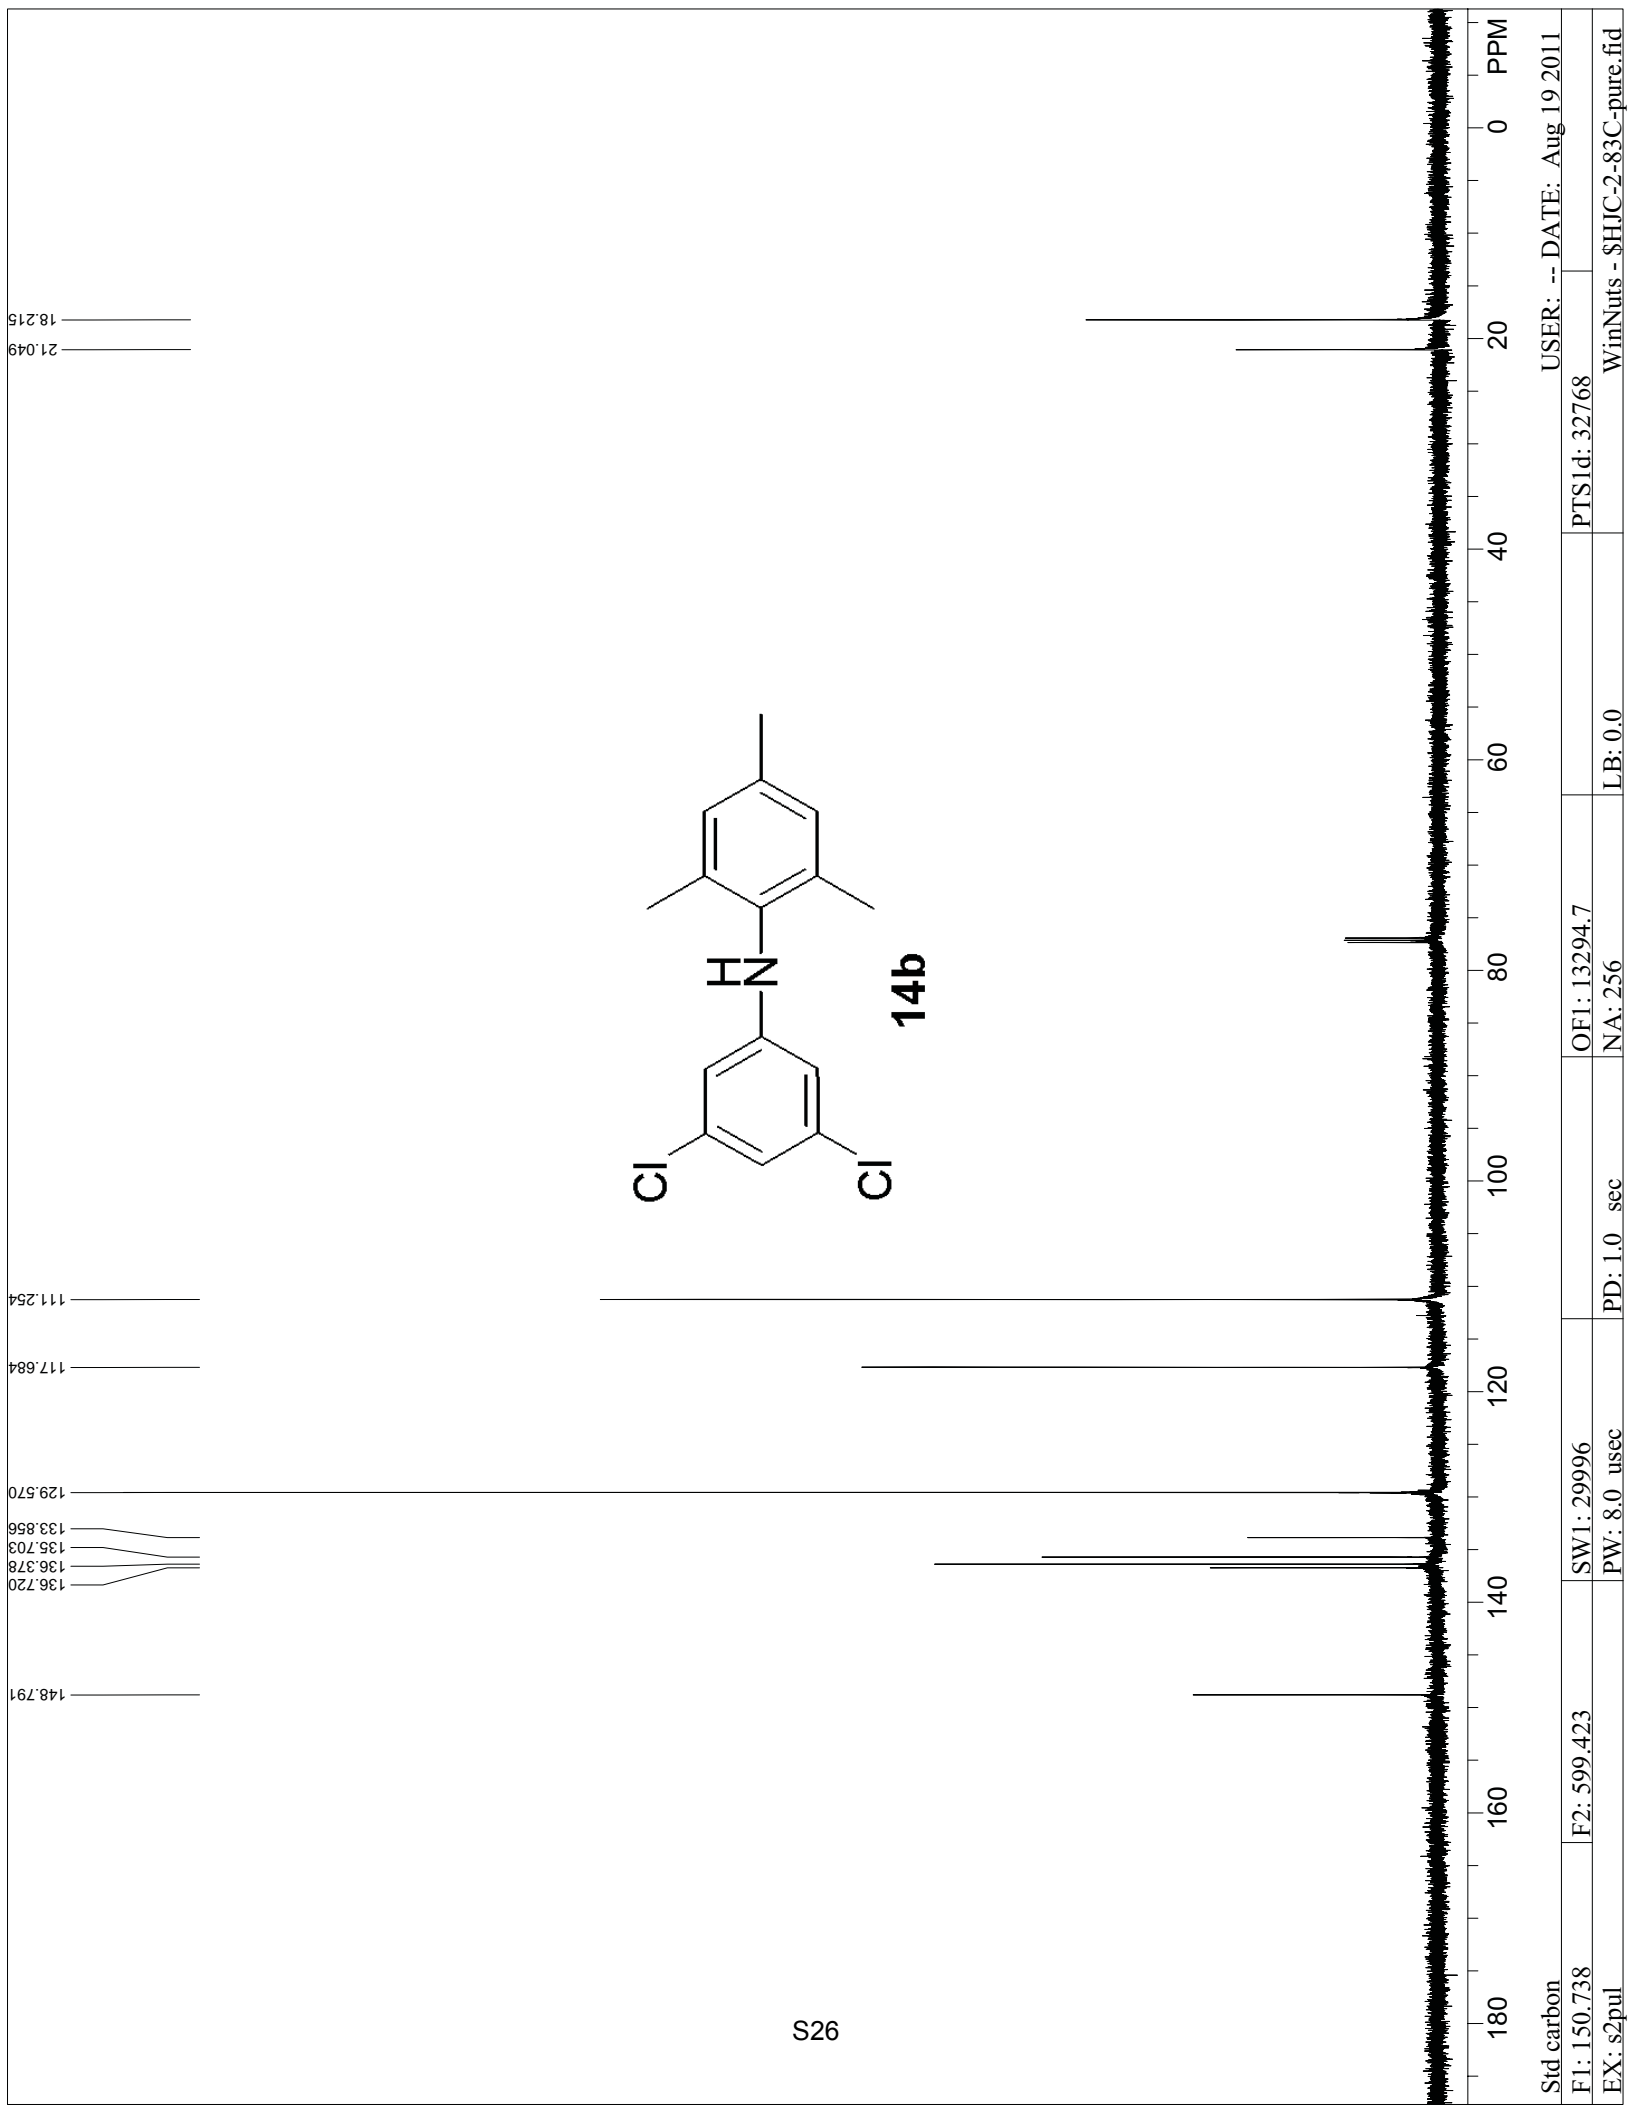

Std carbon  
 F1: 150.738  
 EX: s2pul  
 F2: 599.423  
 SW1: 29996  
 PW: 8.0 usec  
 OF1: 13294.7  
 PD: 1.0 sec  
 NA: 256  
 PTS1d: 32768  
 LB: 0.0  
 USER: -- DATE: Aug 19 2011  
 WinNuts - \$HJC-2-83C-pure.fid

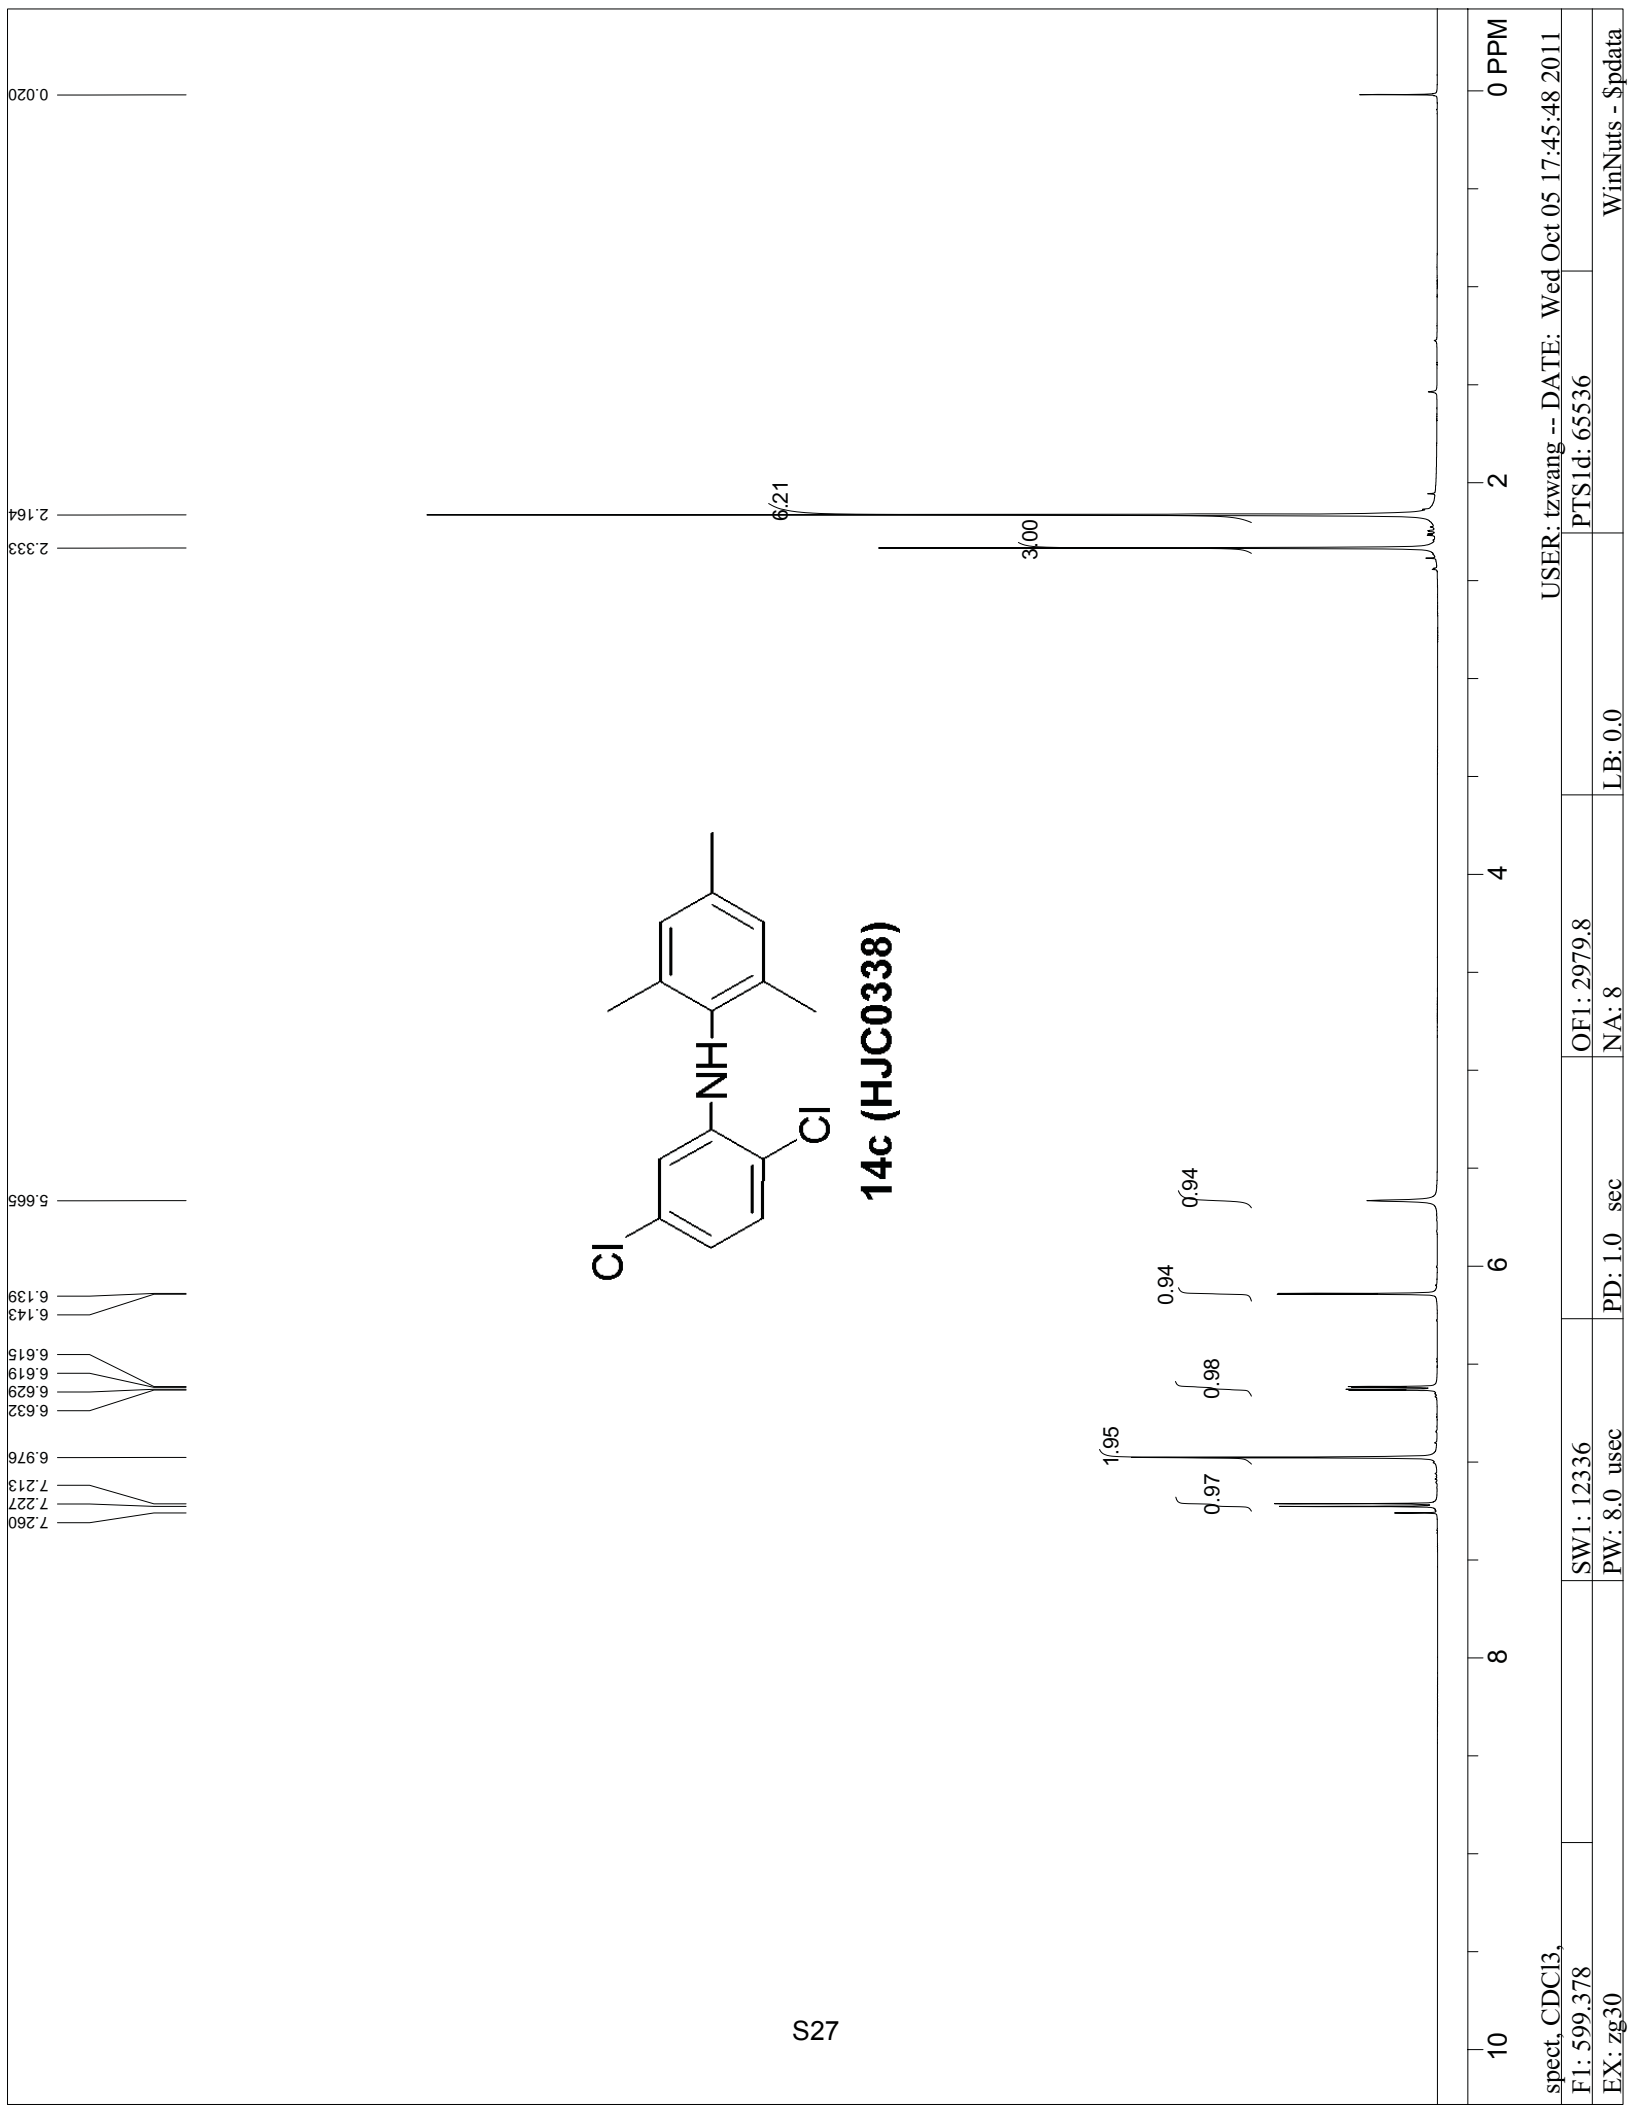

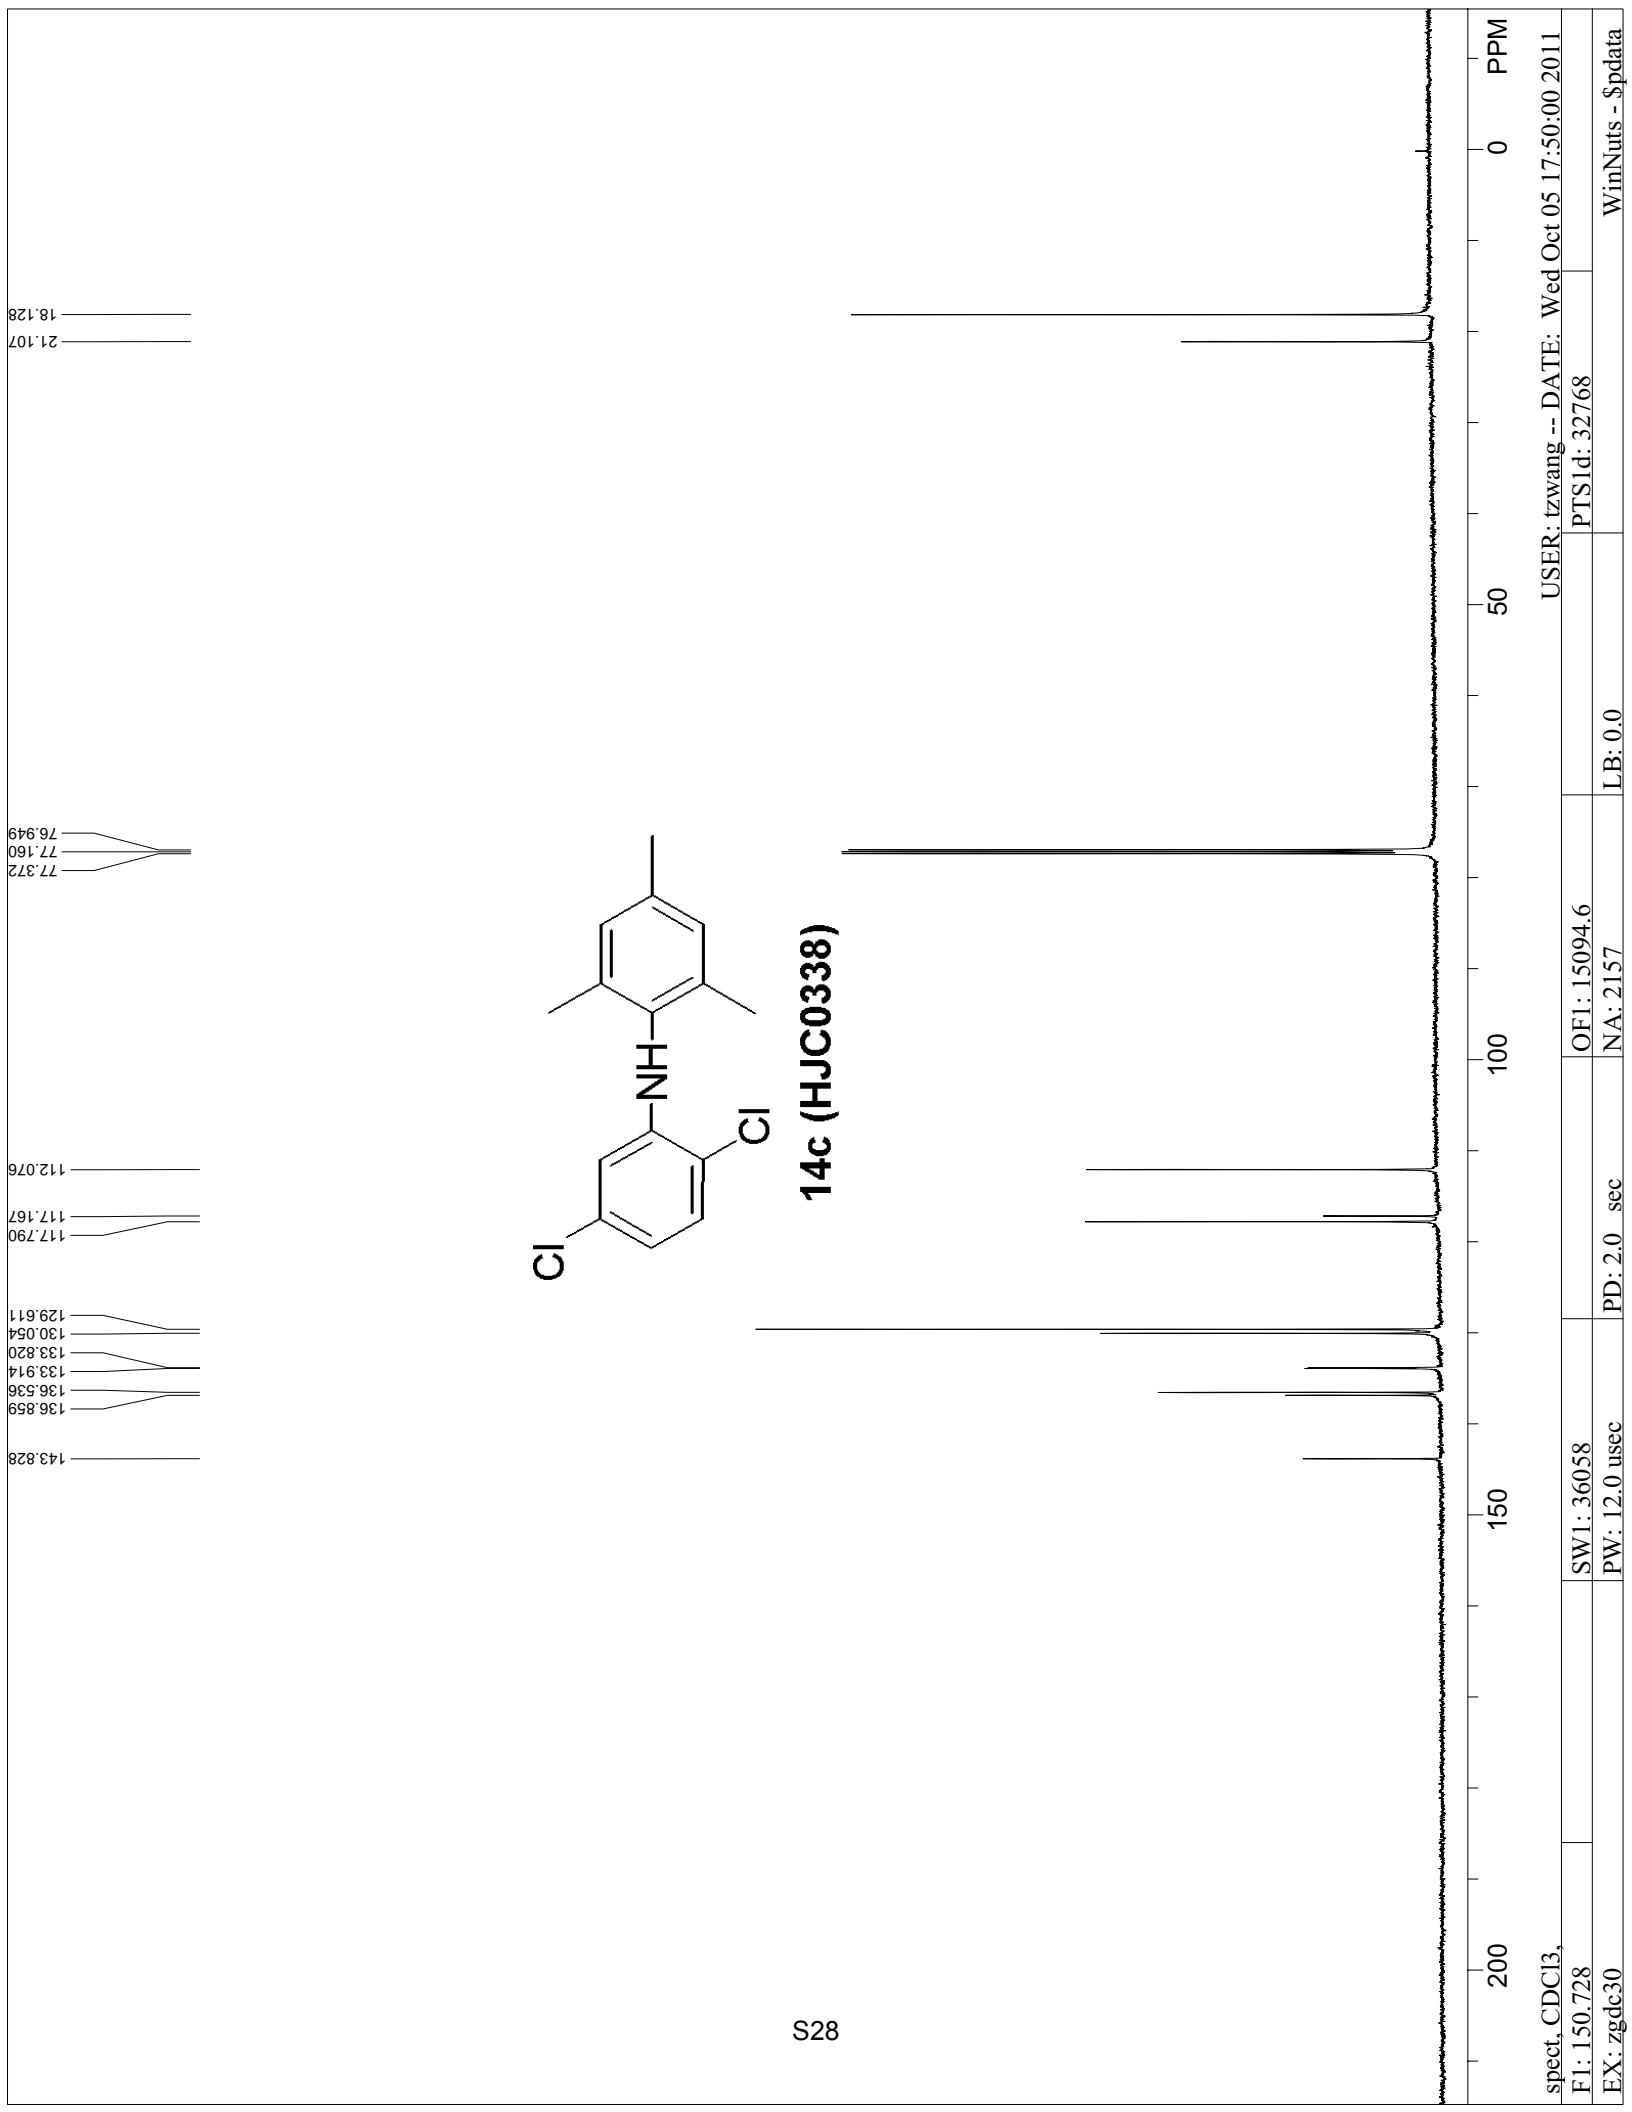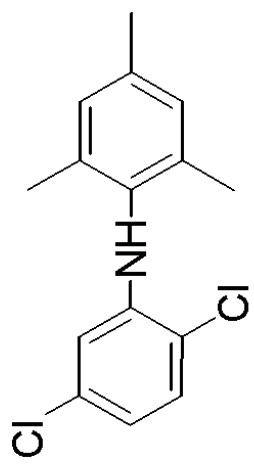

14c (HJC0338)

|               |                                                |
|---------------|------------------------------------------------|
| spect, CDCI3, | USER: tzwang -- DATE: Wed Oct 05 17:50:00 2011 |
| F1: 150.728   | PTS1d: 32768                                   |
| EX: zgdc30    | LB: 0.0                                        |
| SW1: 36058    | OF1: 15094.6                                   |
| PW: 12.0 usec | NA: 2157                                       |
| PD: 2.0 sec   |                                                |
|               | WinNuts - \$pdata                              |

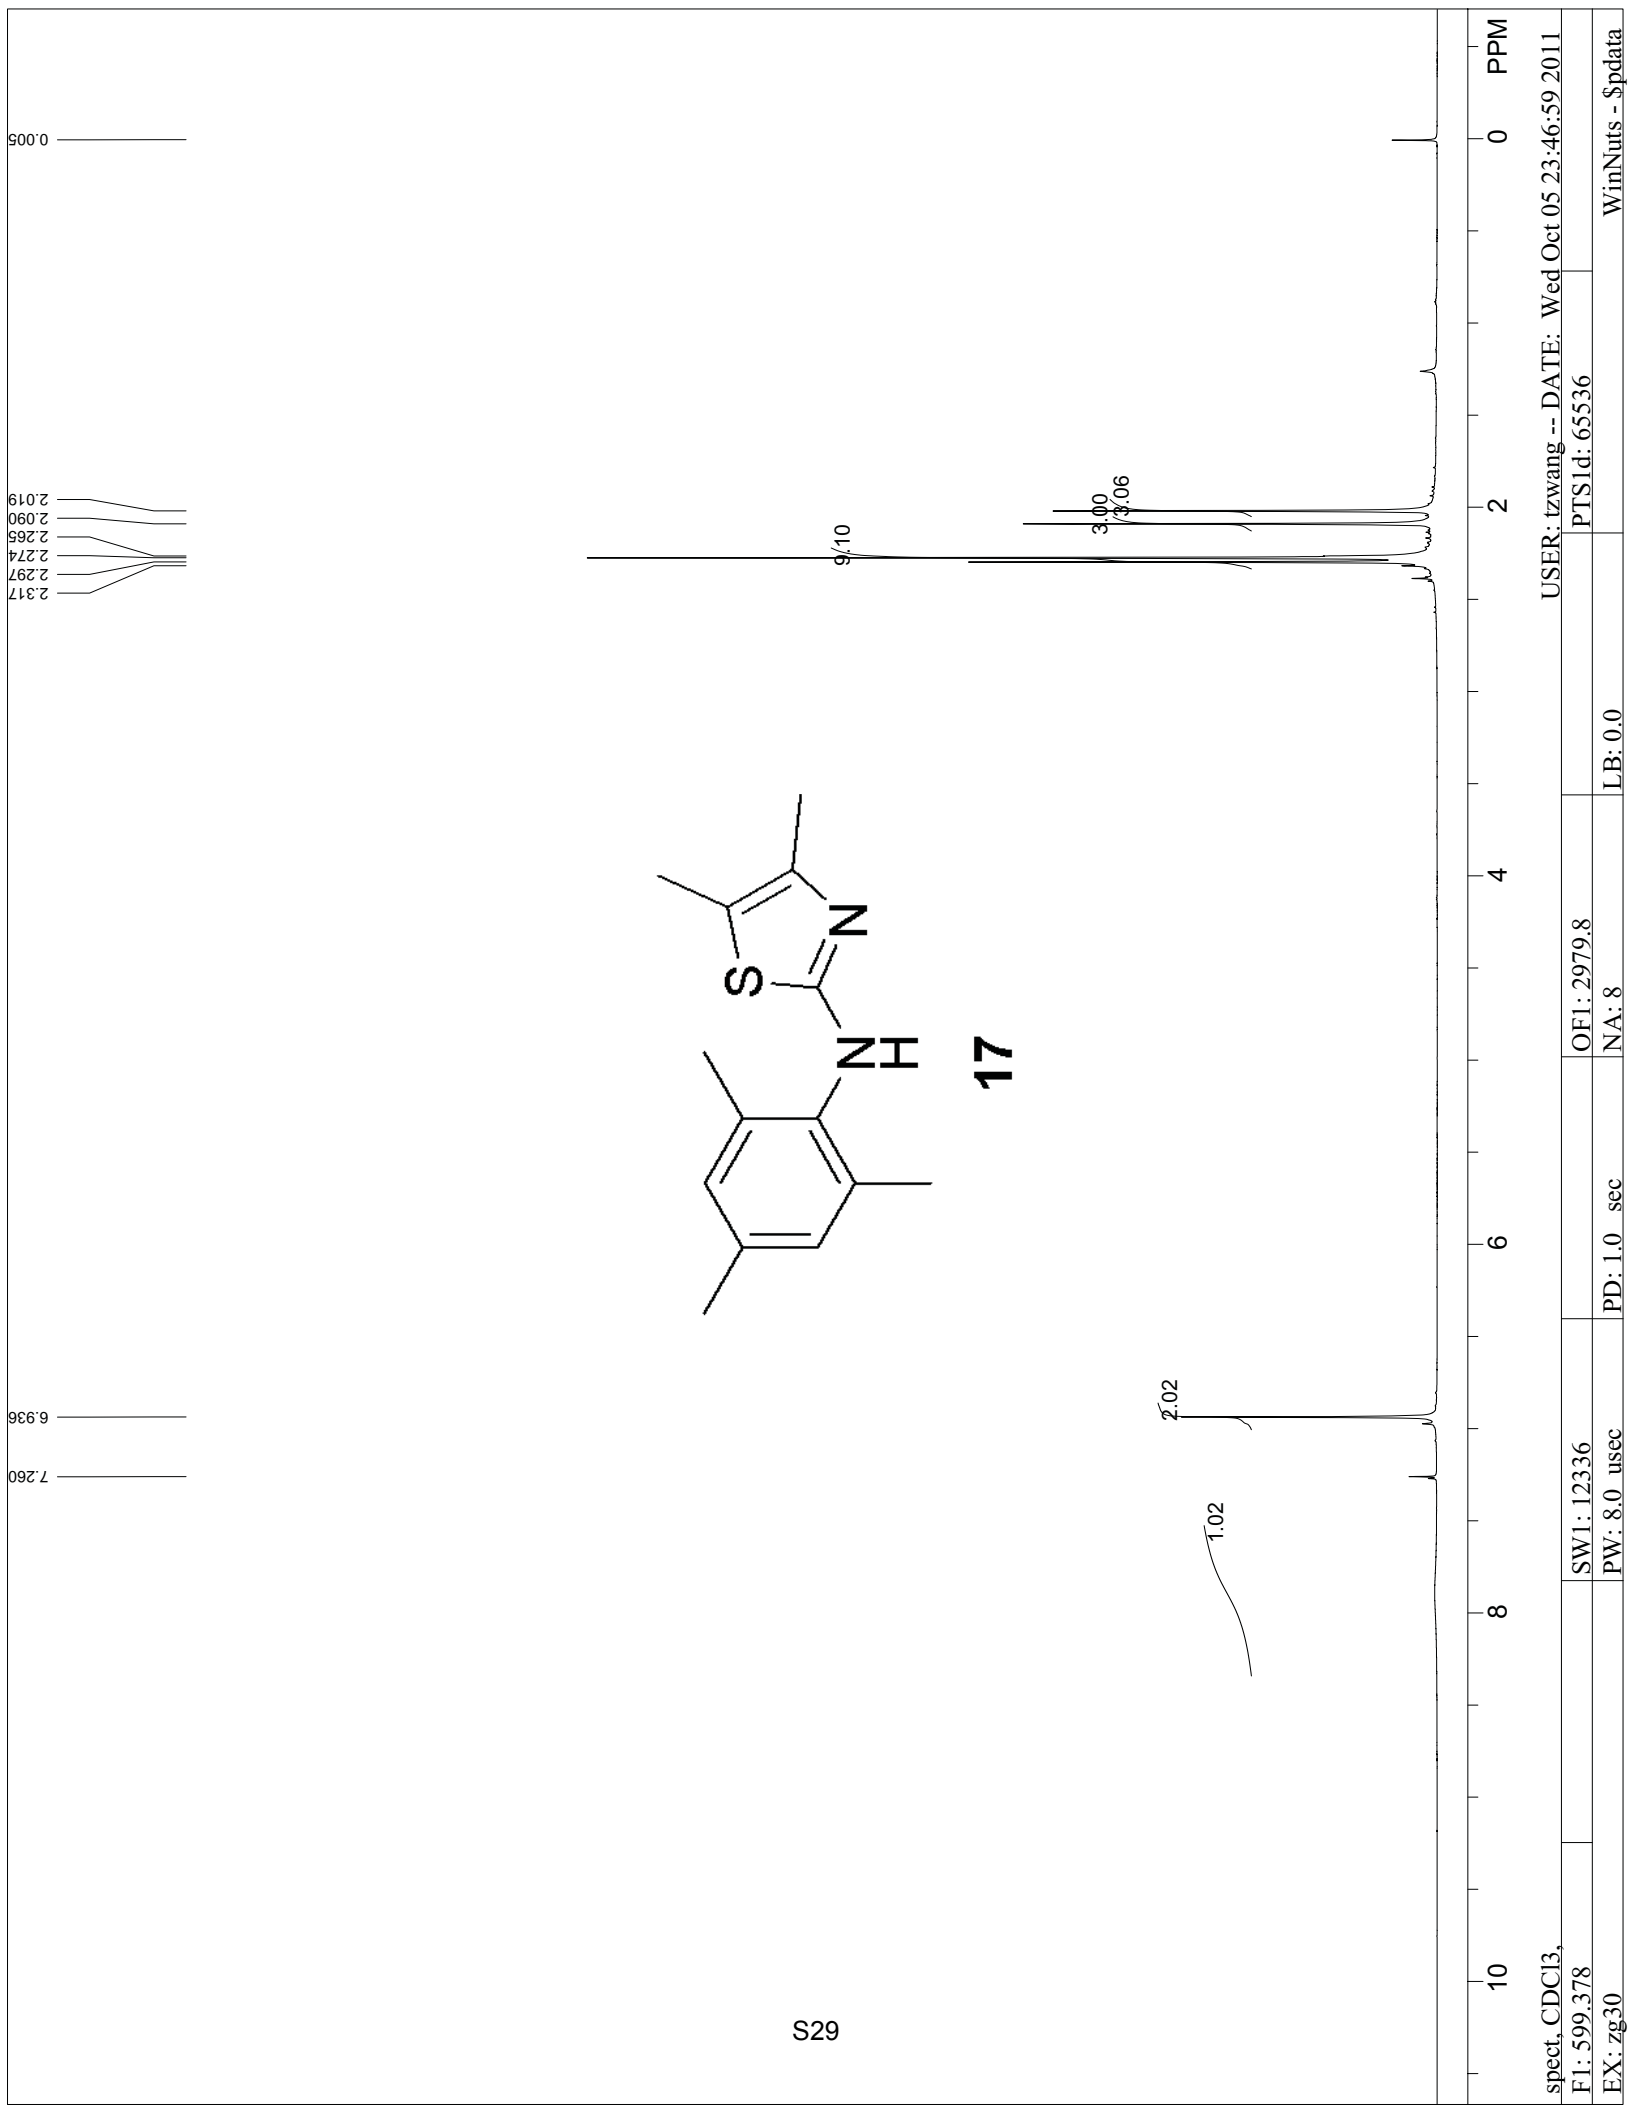

spect, CDCl3, USER: tzwang --- DATE: Wed Oct 05 23:46:59 2011  
 F1: 599.378 SW1: 12336 OF1: 2979.8 PTS1d: 65536  
 EX: zg30 PW: 8.0 usec PD: 1.0 sec NA: 8 LB: 0.0 WinNuts - \$pdata

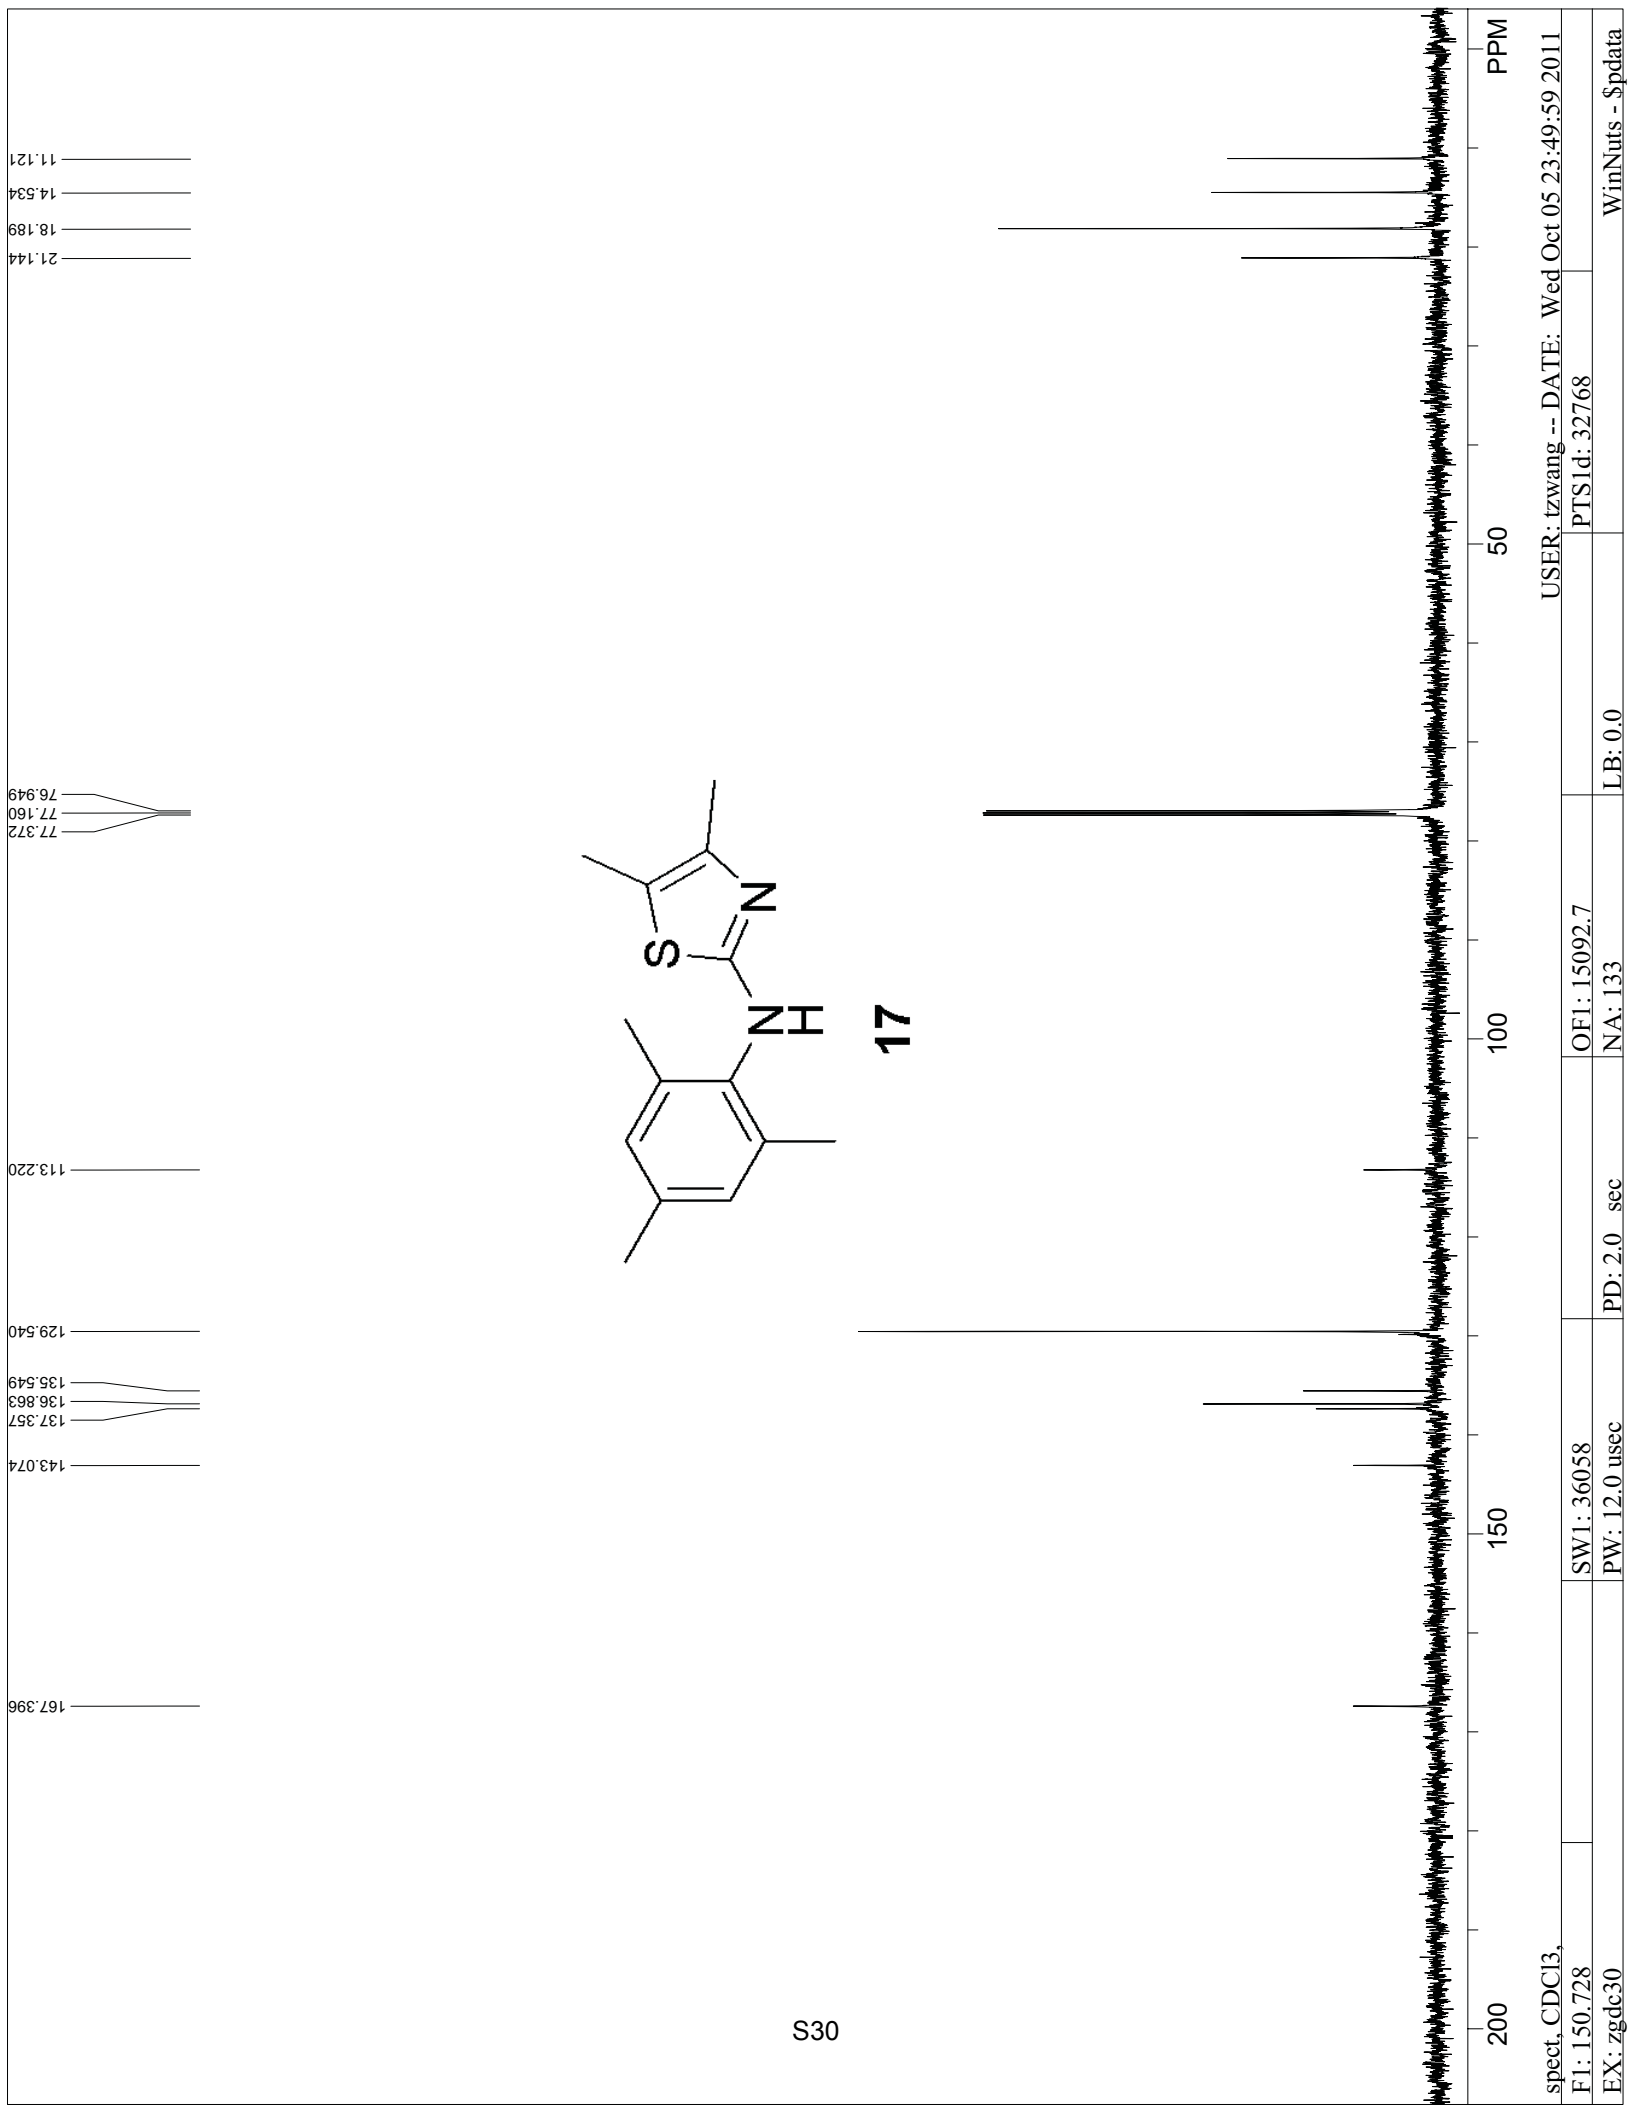

spect, CDCI3, USER: tzwang -- DATE: Wed Oct 05 23:49:59 2011  
 F1: 150.728 OF1: 15092.7 PTS1d: 32768  
 EX: zgdc30 SW1: 36058 NA: 133 LB: 0.0 WinNuts - \$pdata  
 PD: 2.0 sec

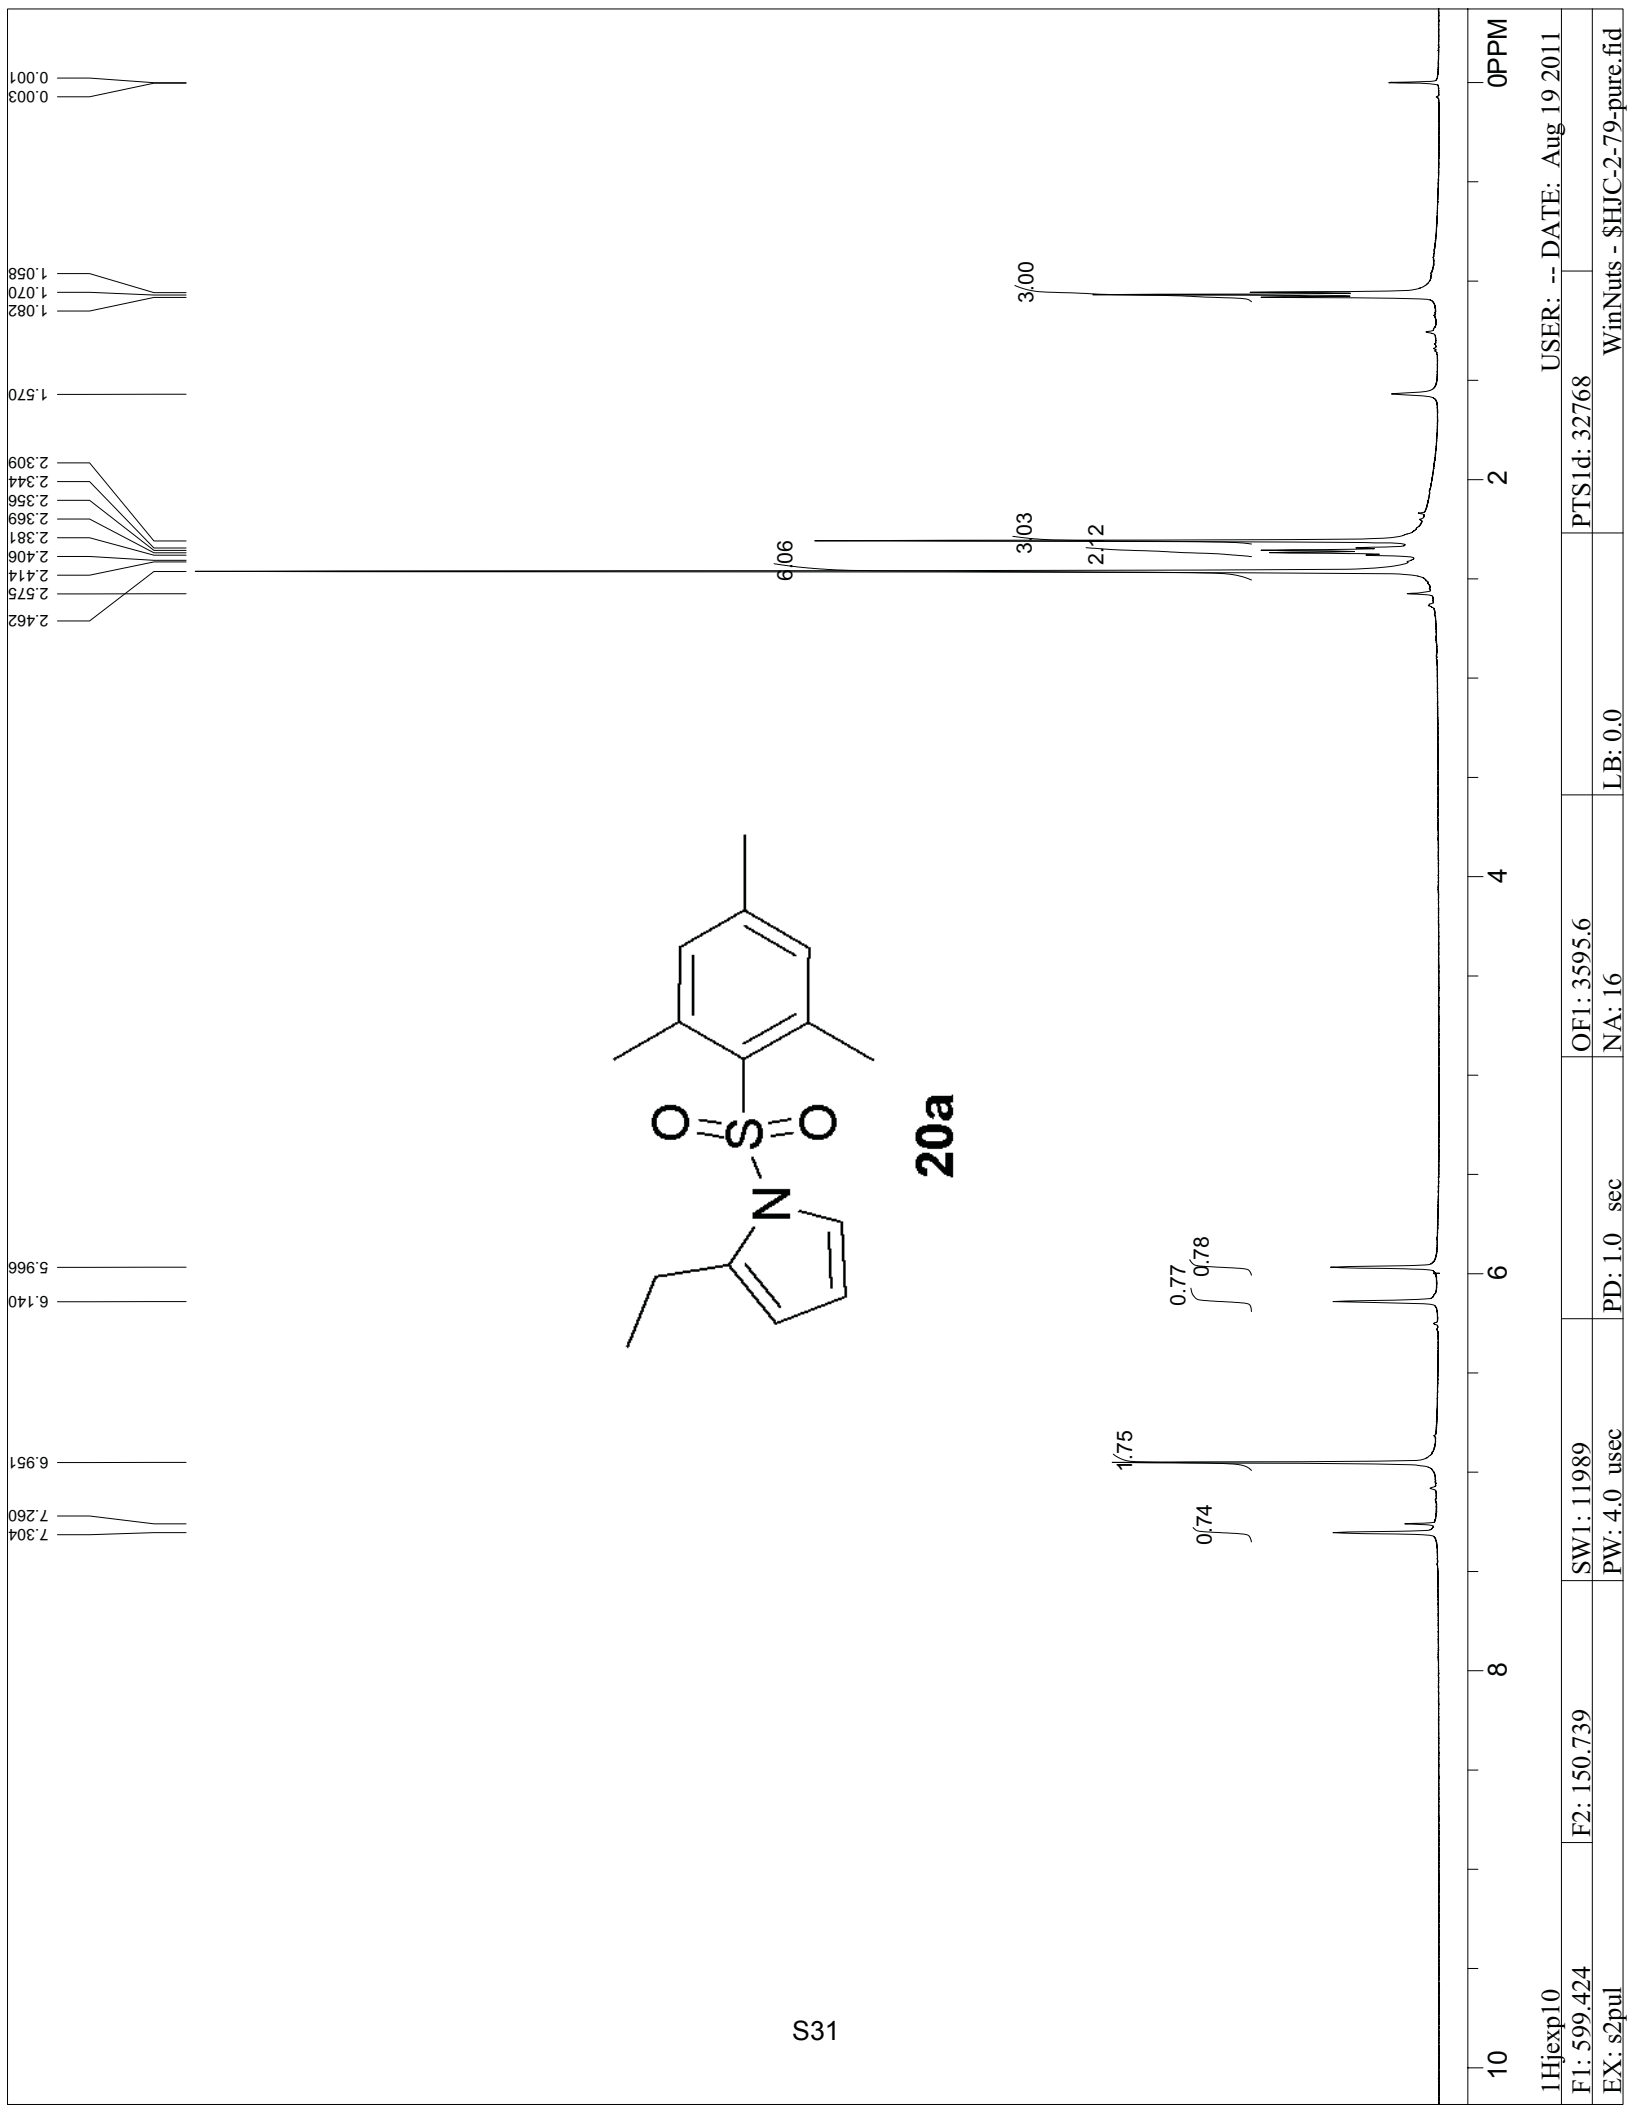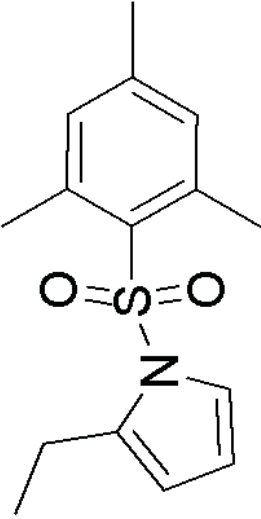

20a

|             |              |                   |
|-------------|--------------|-------------------|
| 1Hjexp10    | USER: --     | DATE: Aug 19 2011 |
| F1: 599.424 | PTS1d: 32768 |                   |
| F2: 150.739 | OF1: 3595.6  |                   |
| EX: s2pul   | NA: 16       | LB: 0.0           |
|             | PD: 1.0 sec  |                   |

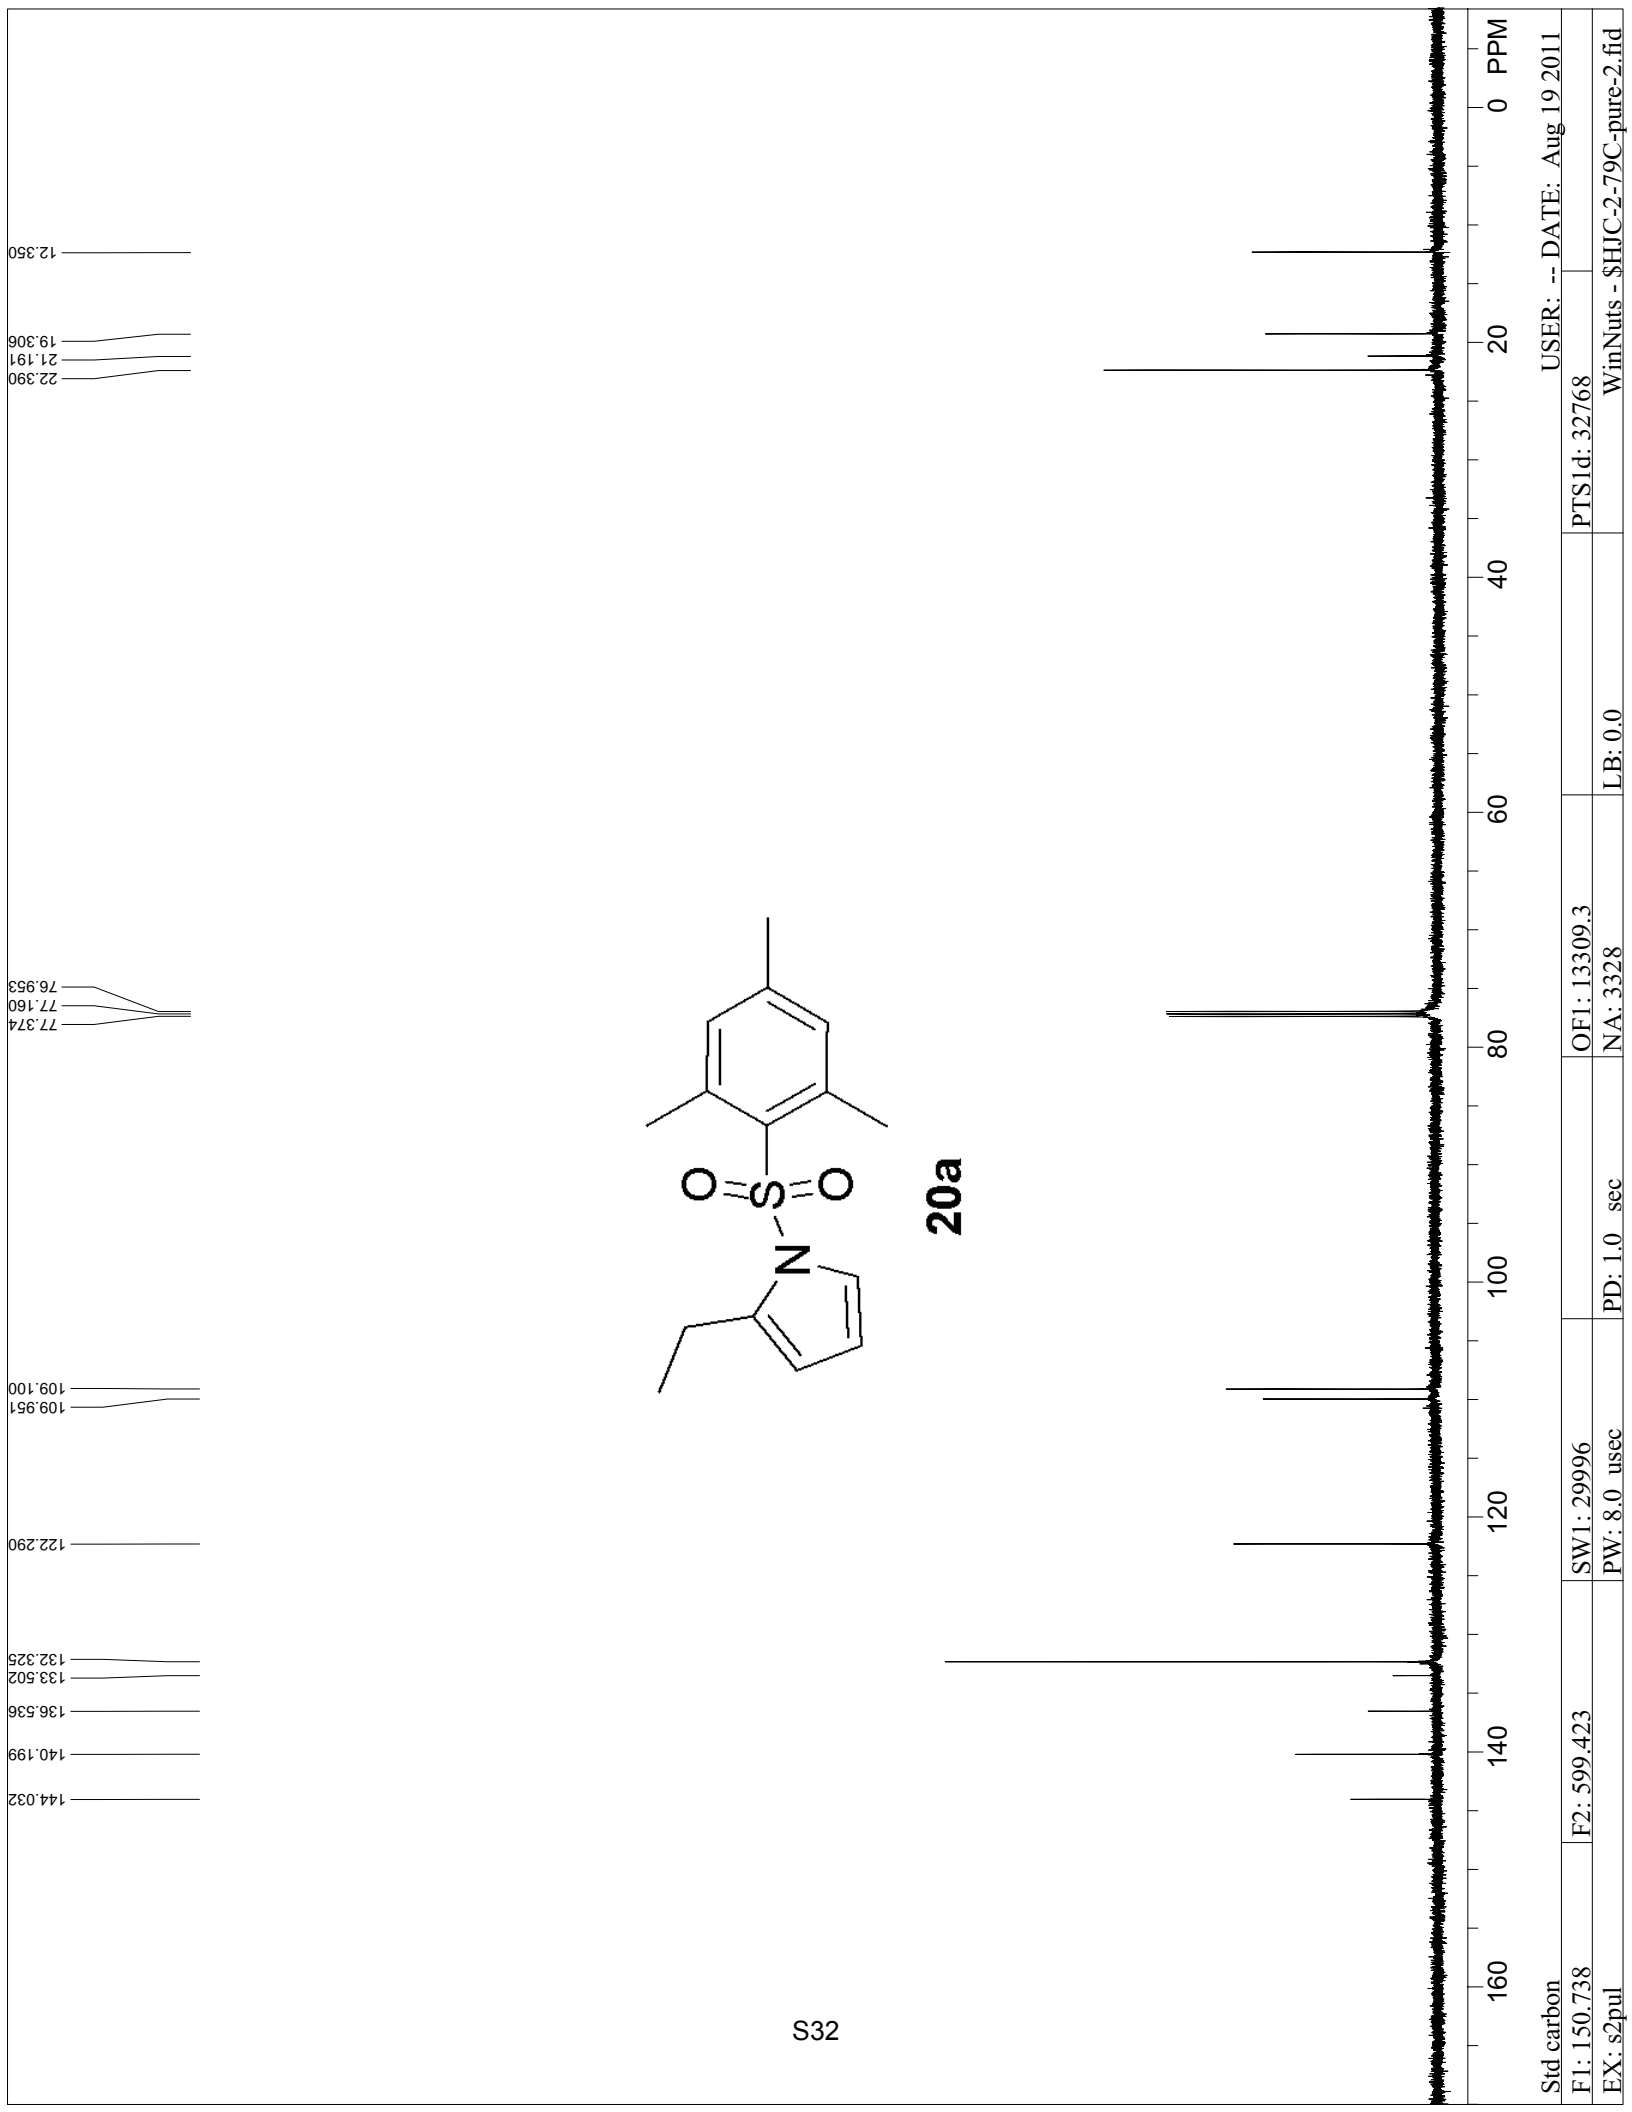

Std carbon  
 F1: 150.738 F2: 599.423 SW1: 29996 OF1: 13309.3  
 EX: s2pul PW: 8.0 usec PD: 1.0 sec NA: 3328 LB: 0.0  
 USER: -- DATE: Aug 19 2011 PTS1d: 32768  
 WinNuts - \$HIC-2-79C-pure-2.fid



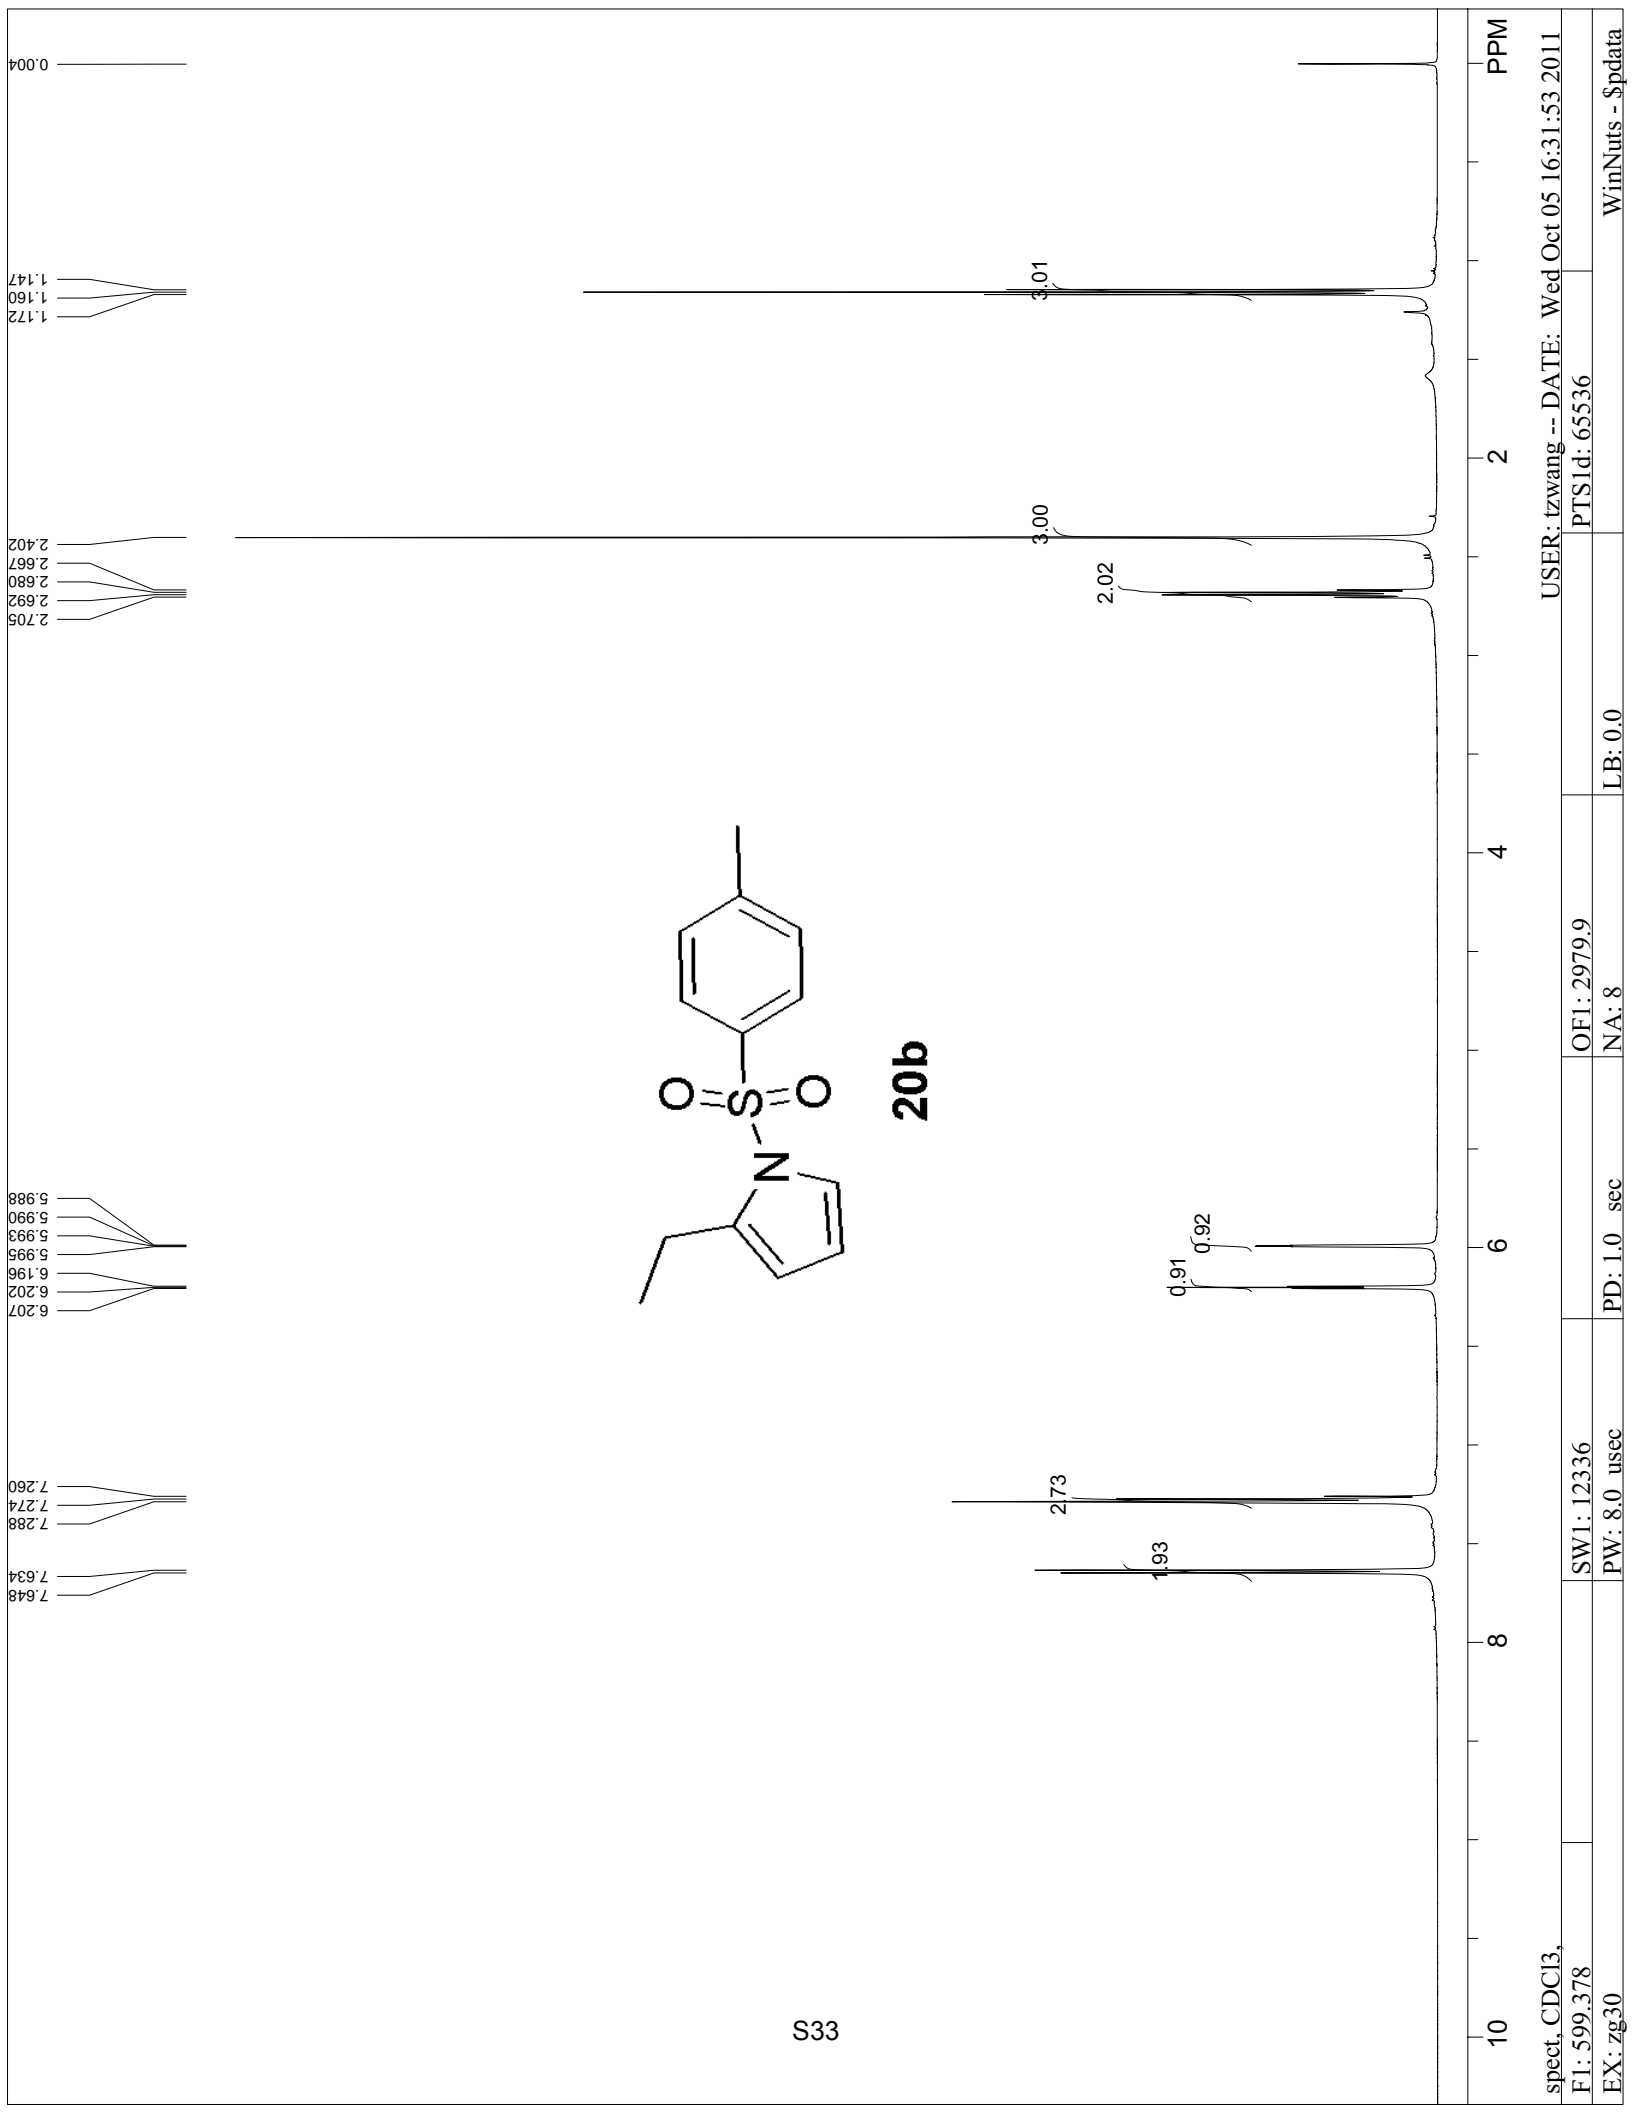

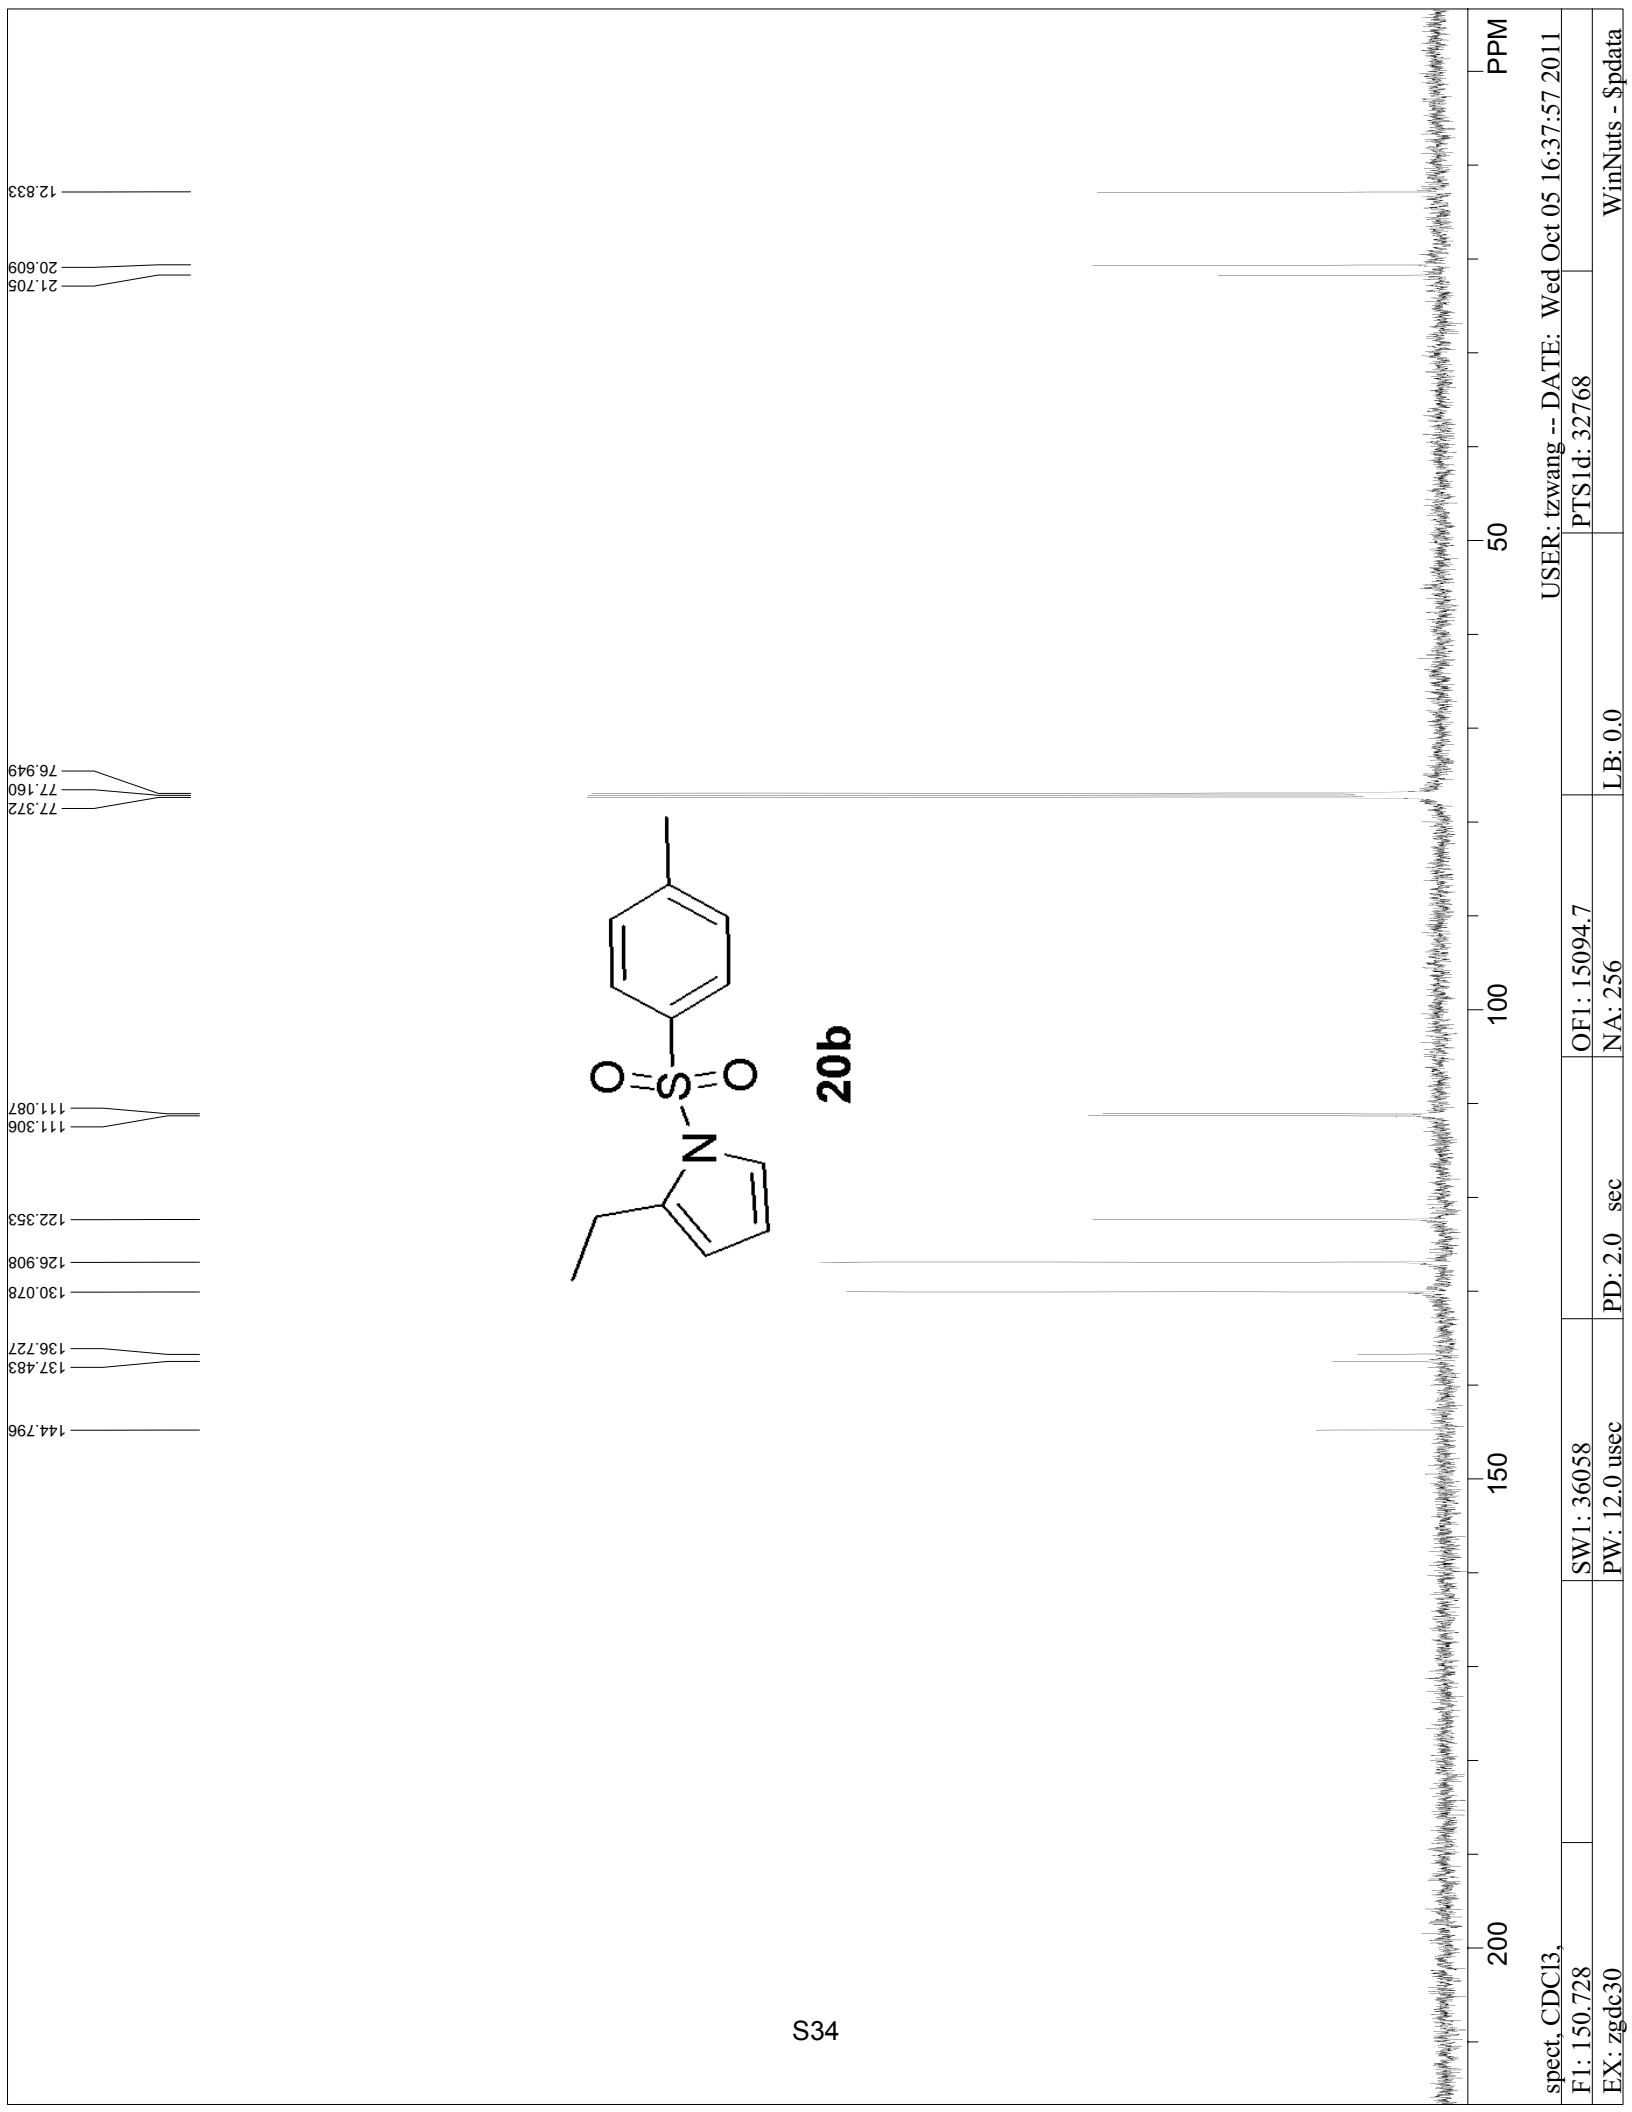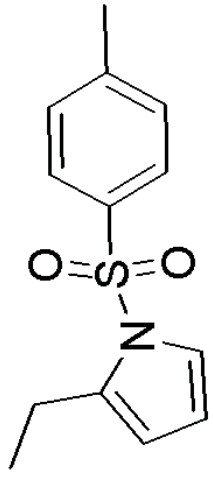

20b

|               |                                                |
|---------------|------------------------------------------------|
| spect, CDCI3, | USER: tzwang -- DATE: Wed Oct 05 16:37:57 2011 |
| F1: 150.728   | PTS1d: 32768                                   |
| EX: zgdc30    | LB: 0.0                                        |
| SW1: 36058    | OF1: 15094.7                                   |
| PW: 12.0 usec | NA: 256                                        |
| PD: 2.0 sec   |                                                |
|               | WinNuts - \$pdata                              |

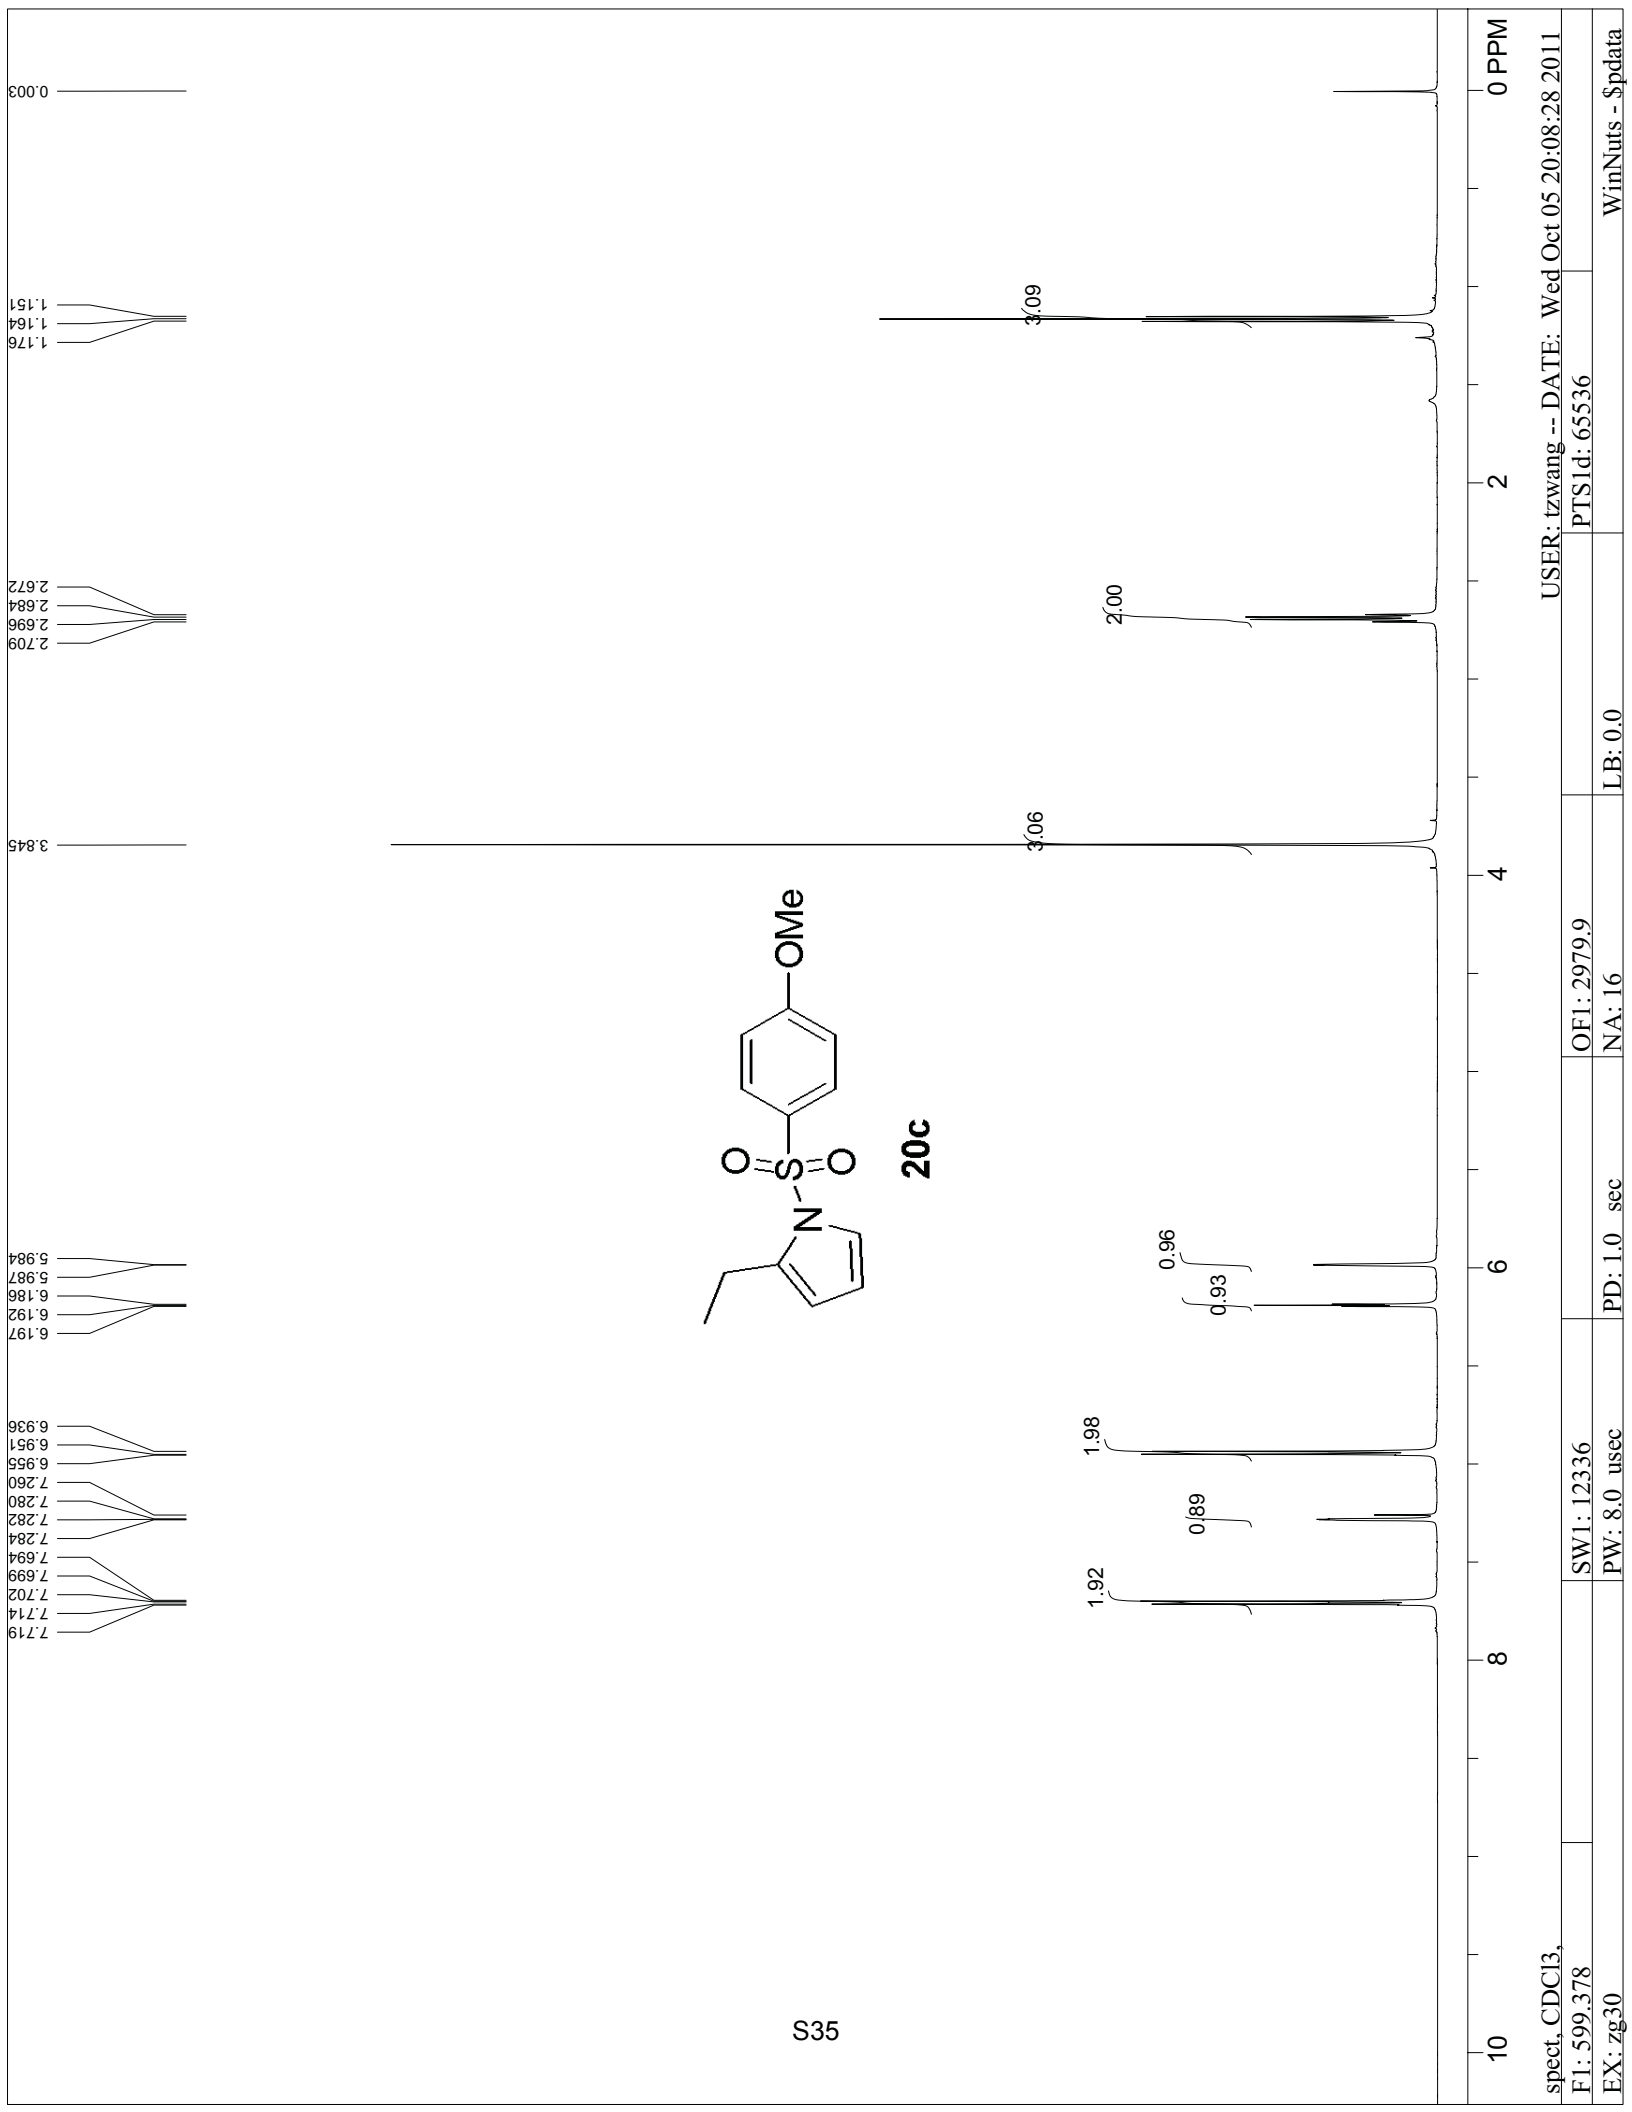

S35

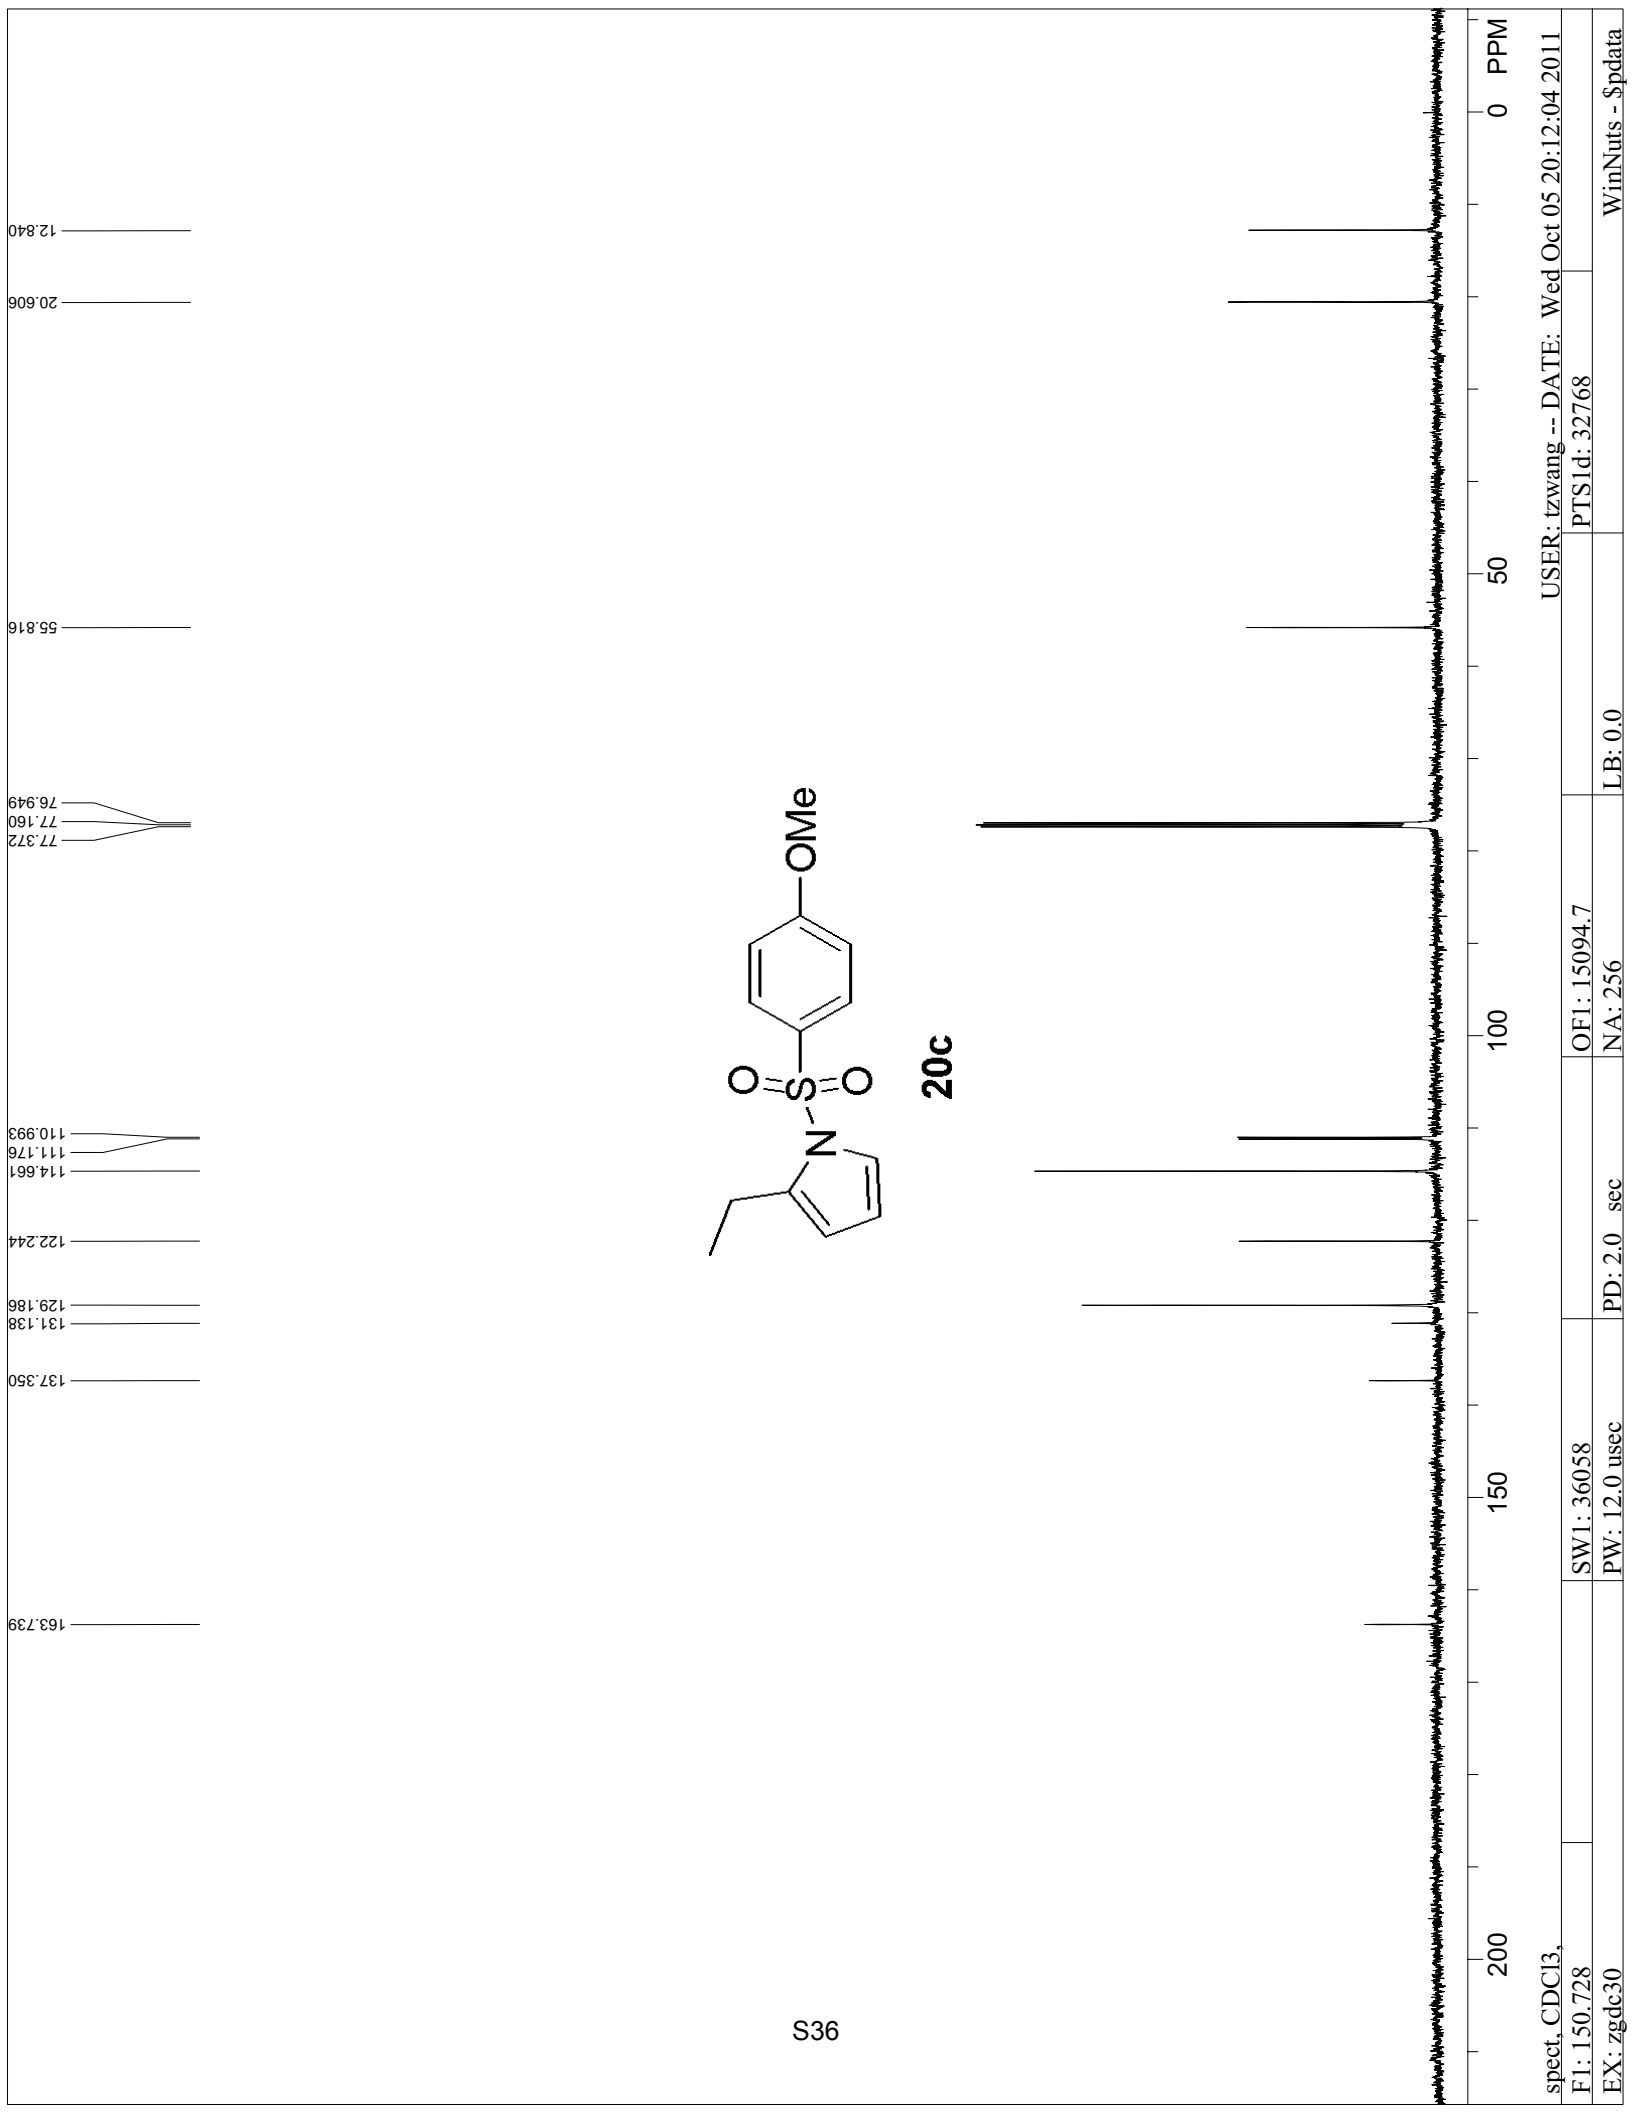

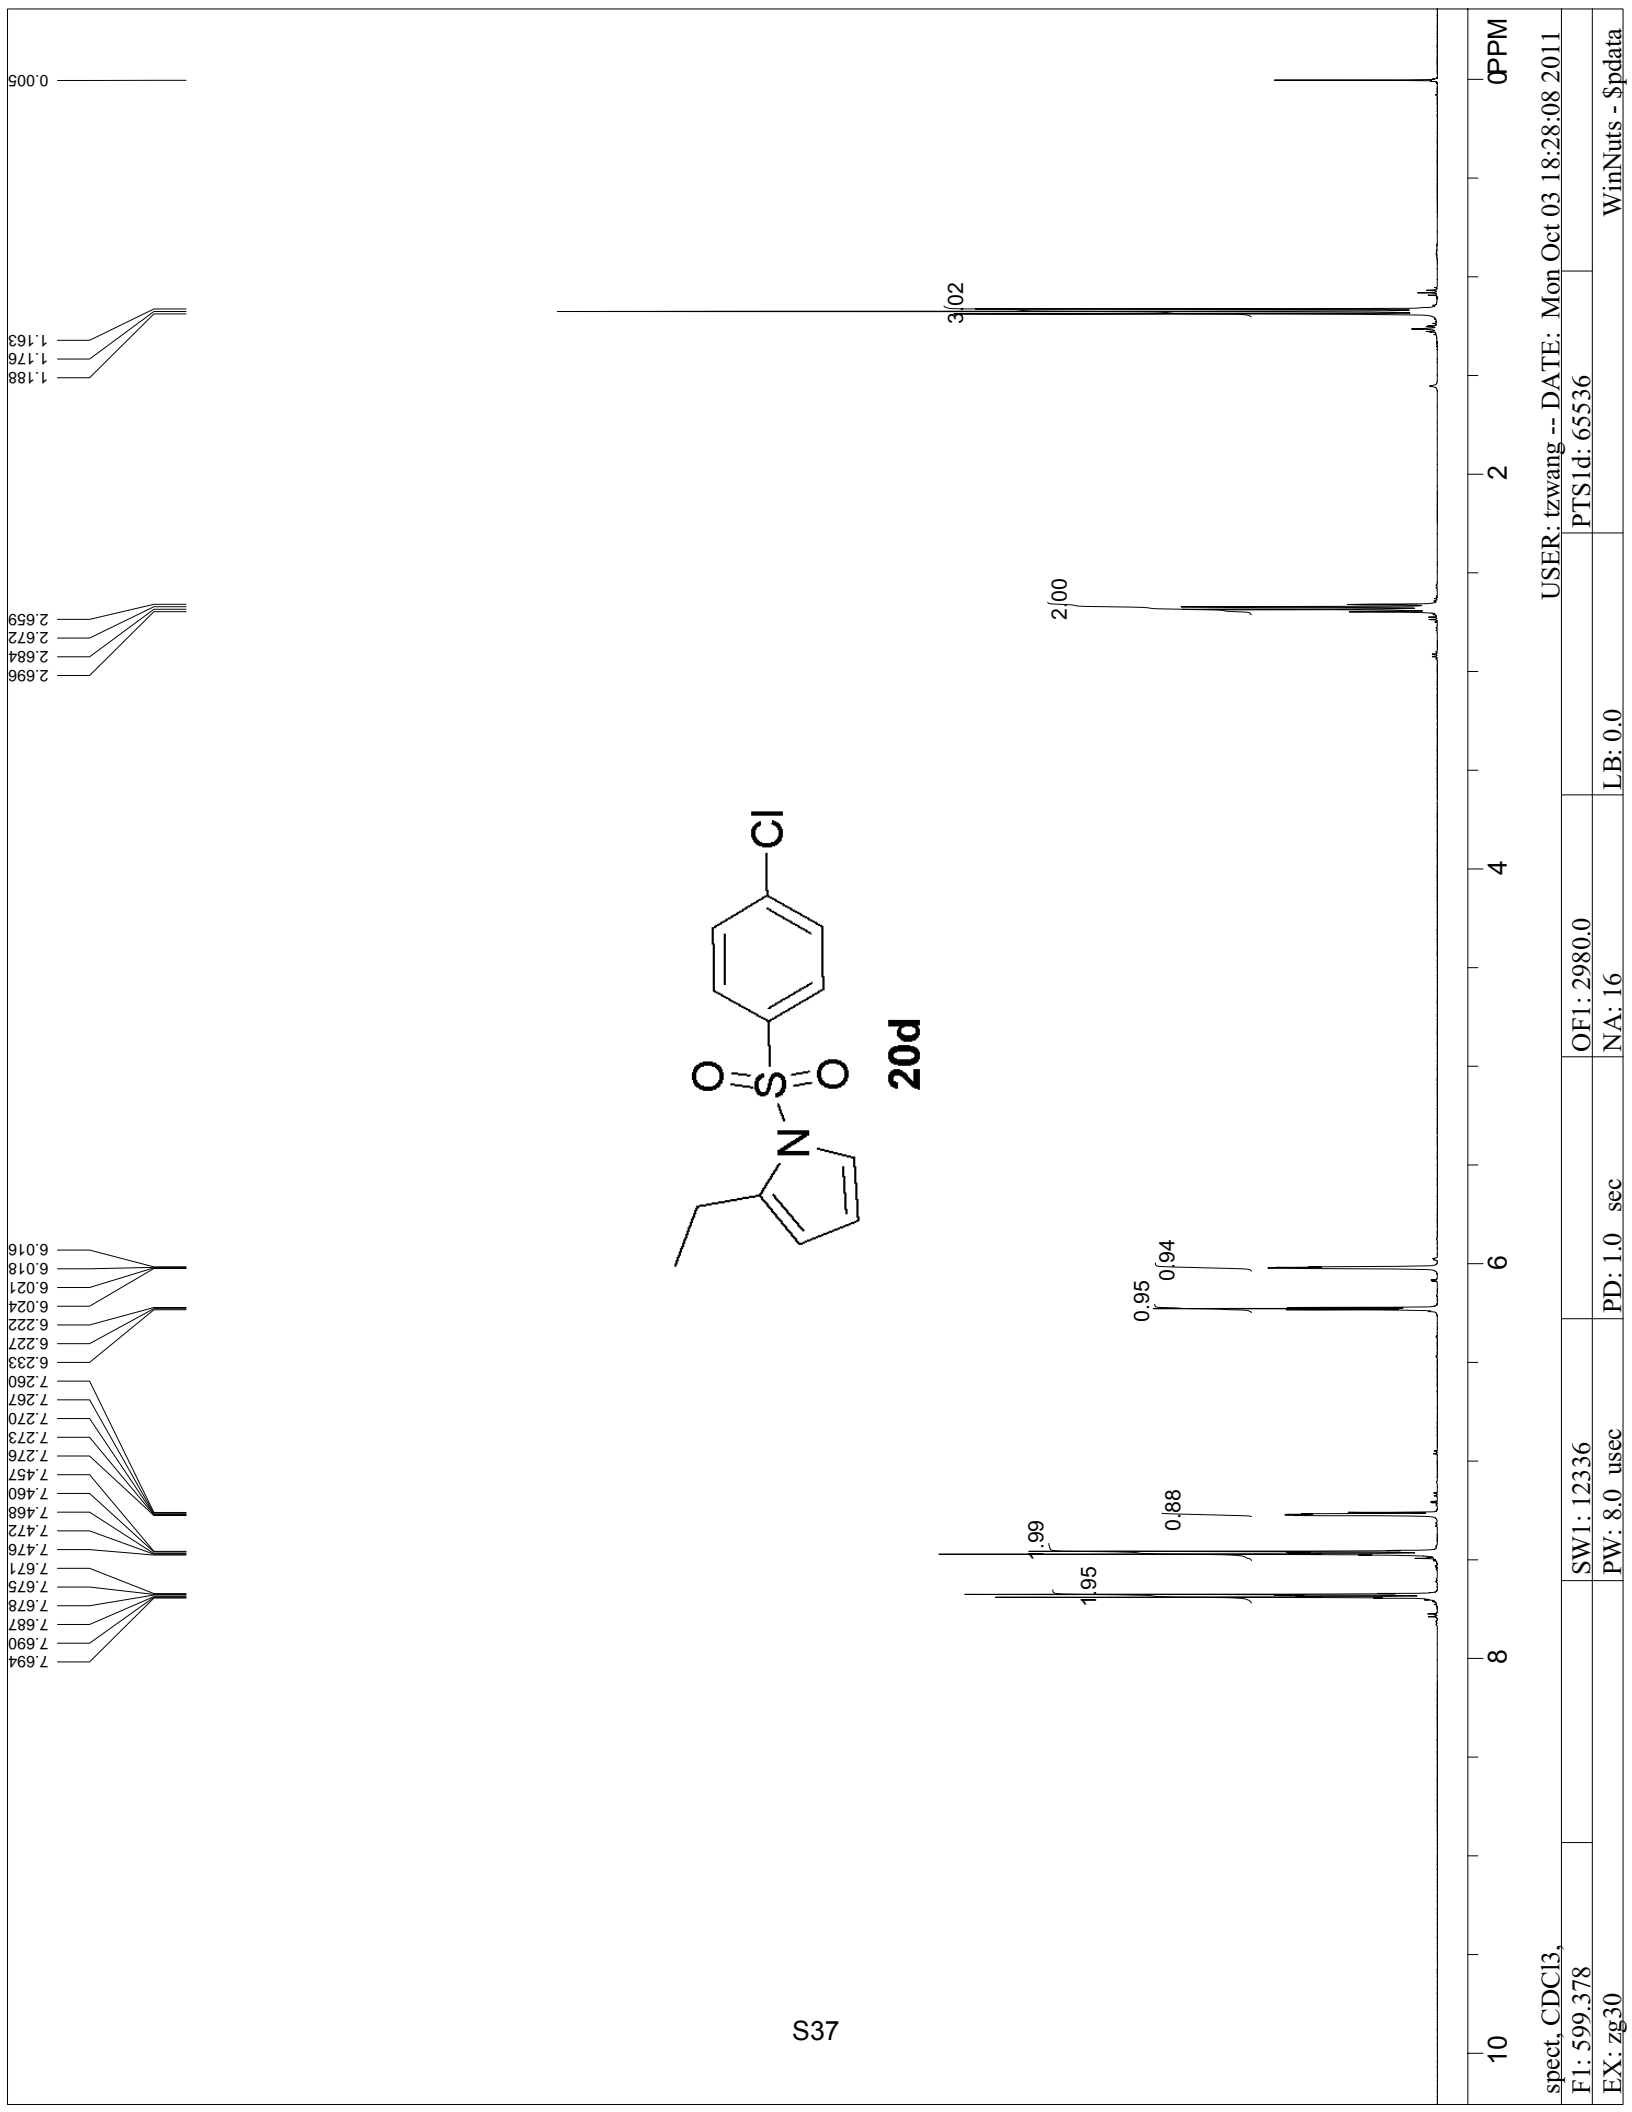

spect, CDCl3, USER: tzwang -- DATE: Mon Oct 03 18:28:08 2011  
 F1: 599.378 OF1: 2980.0 PTS1d: 65536  
 EX: zg30 PW: 8.0 usec PD: 1.0 sec LB: 0.0 WinNuts - \$pdata

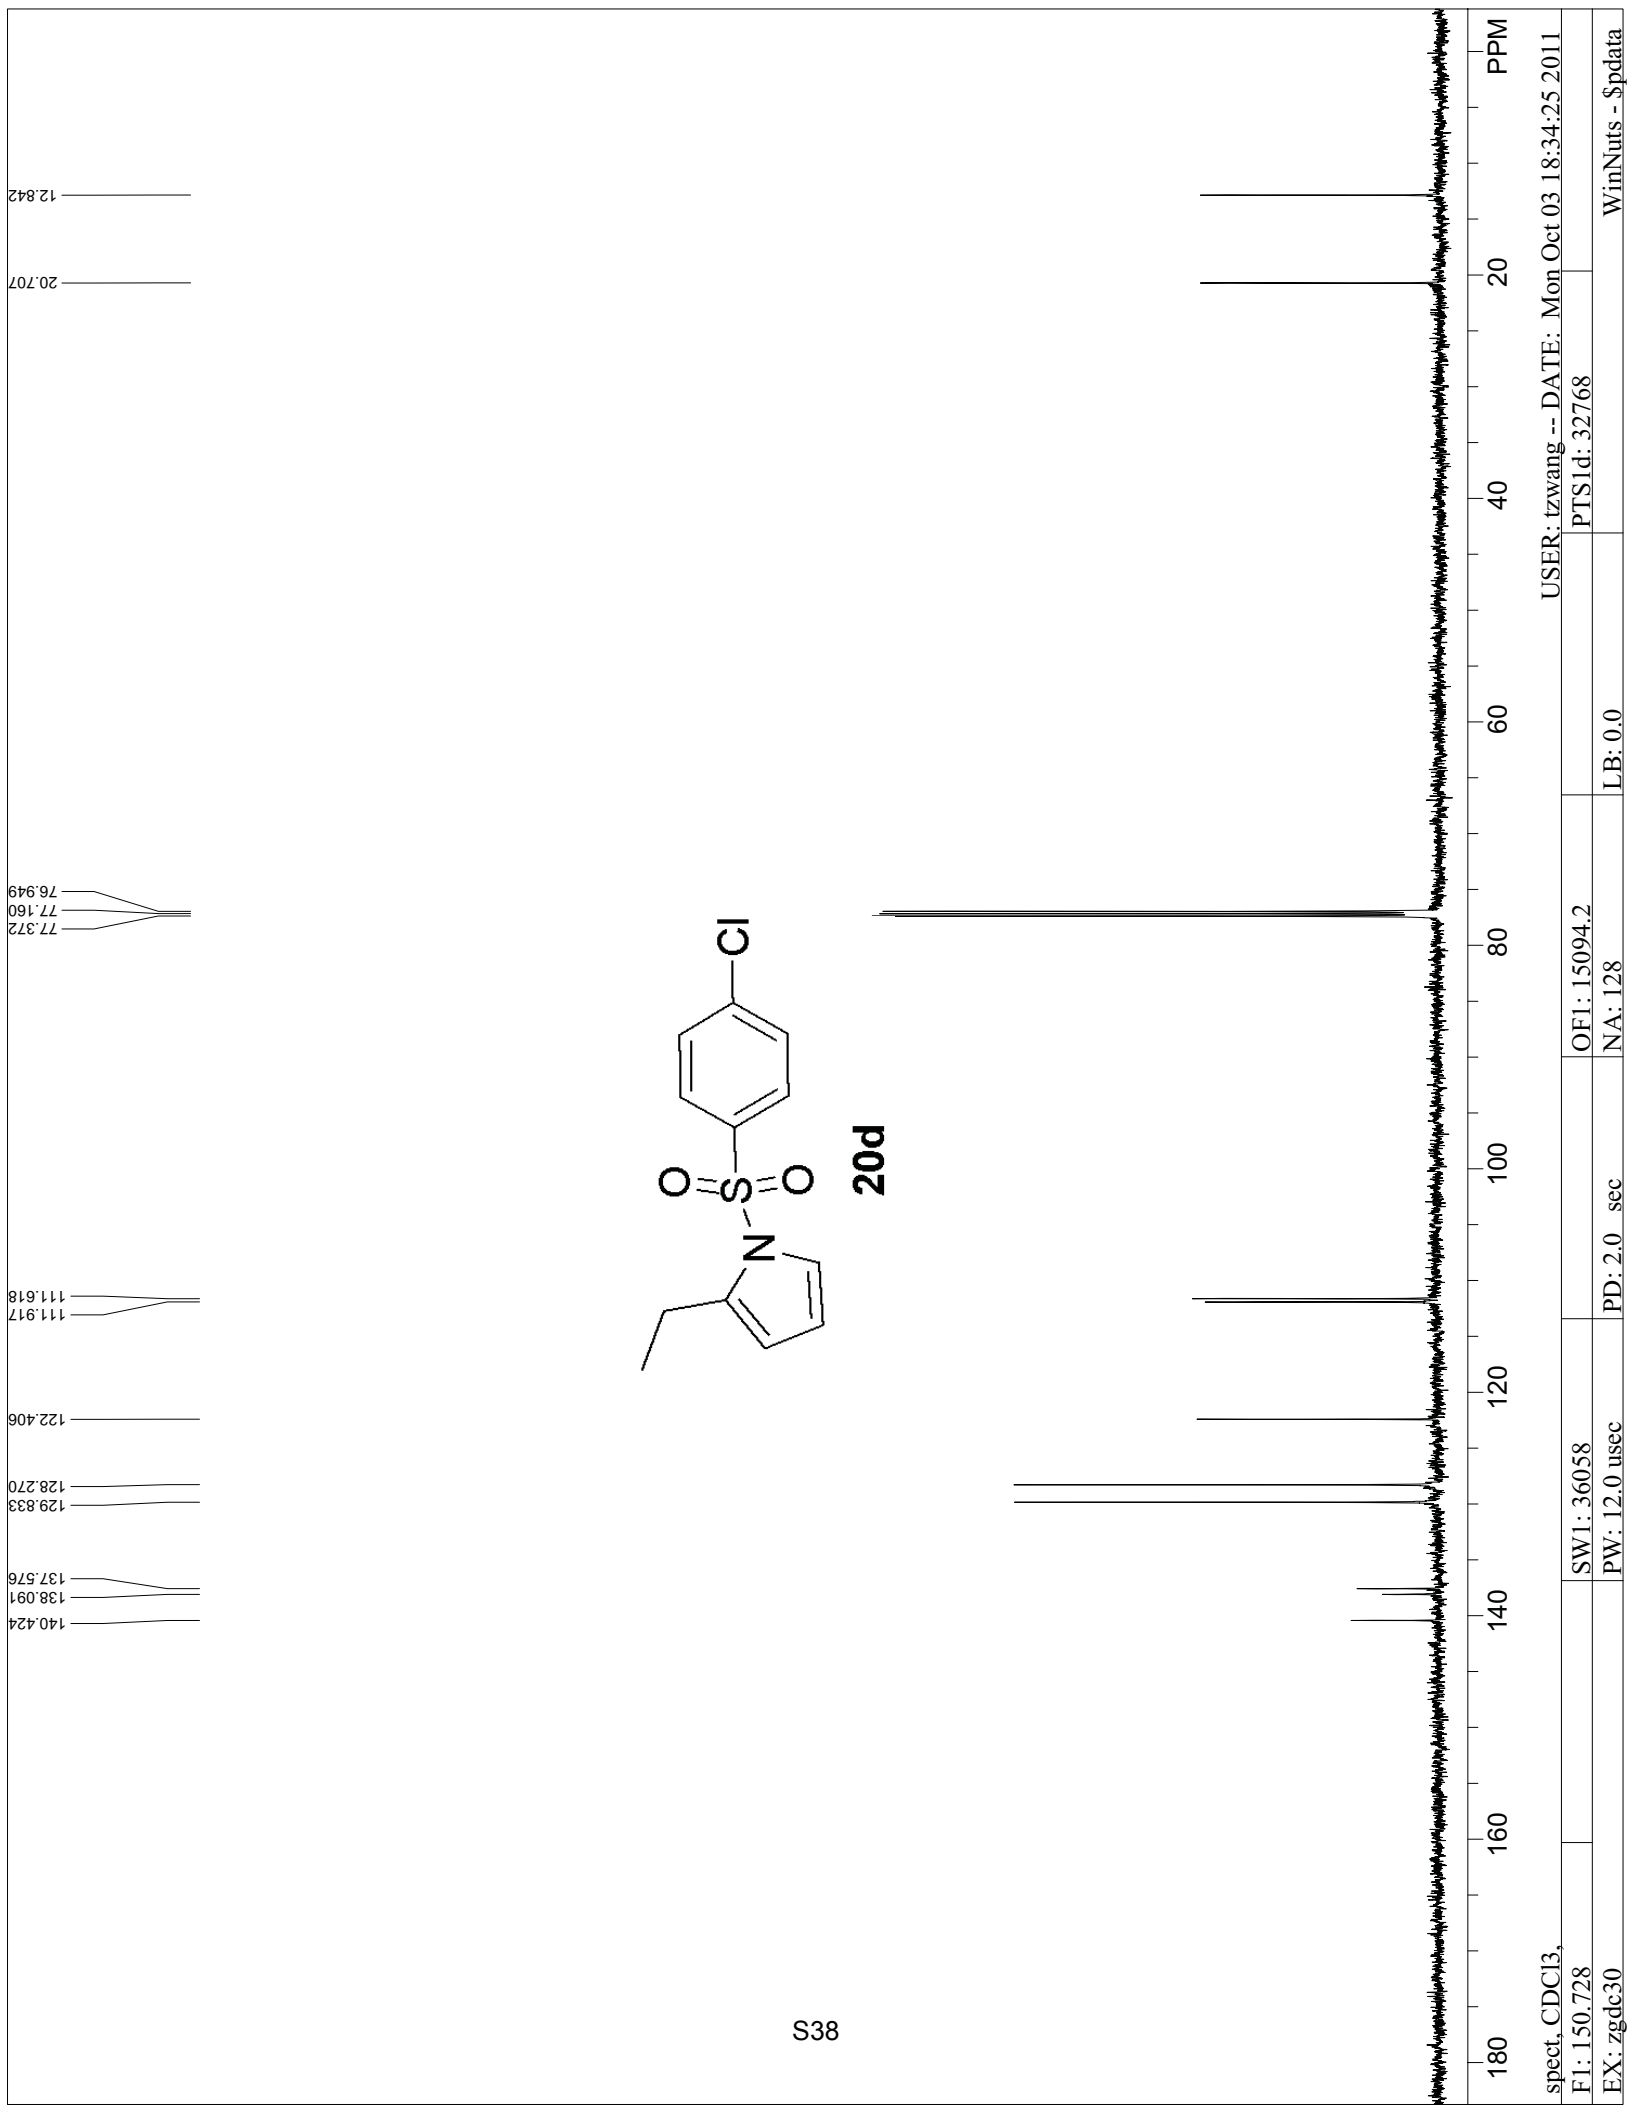

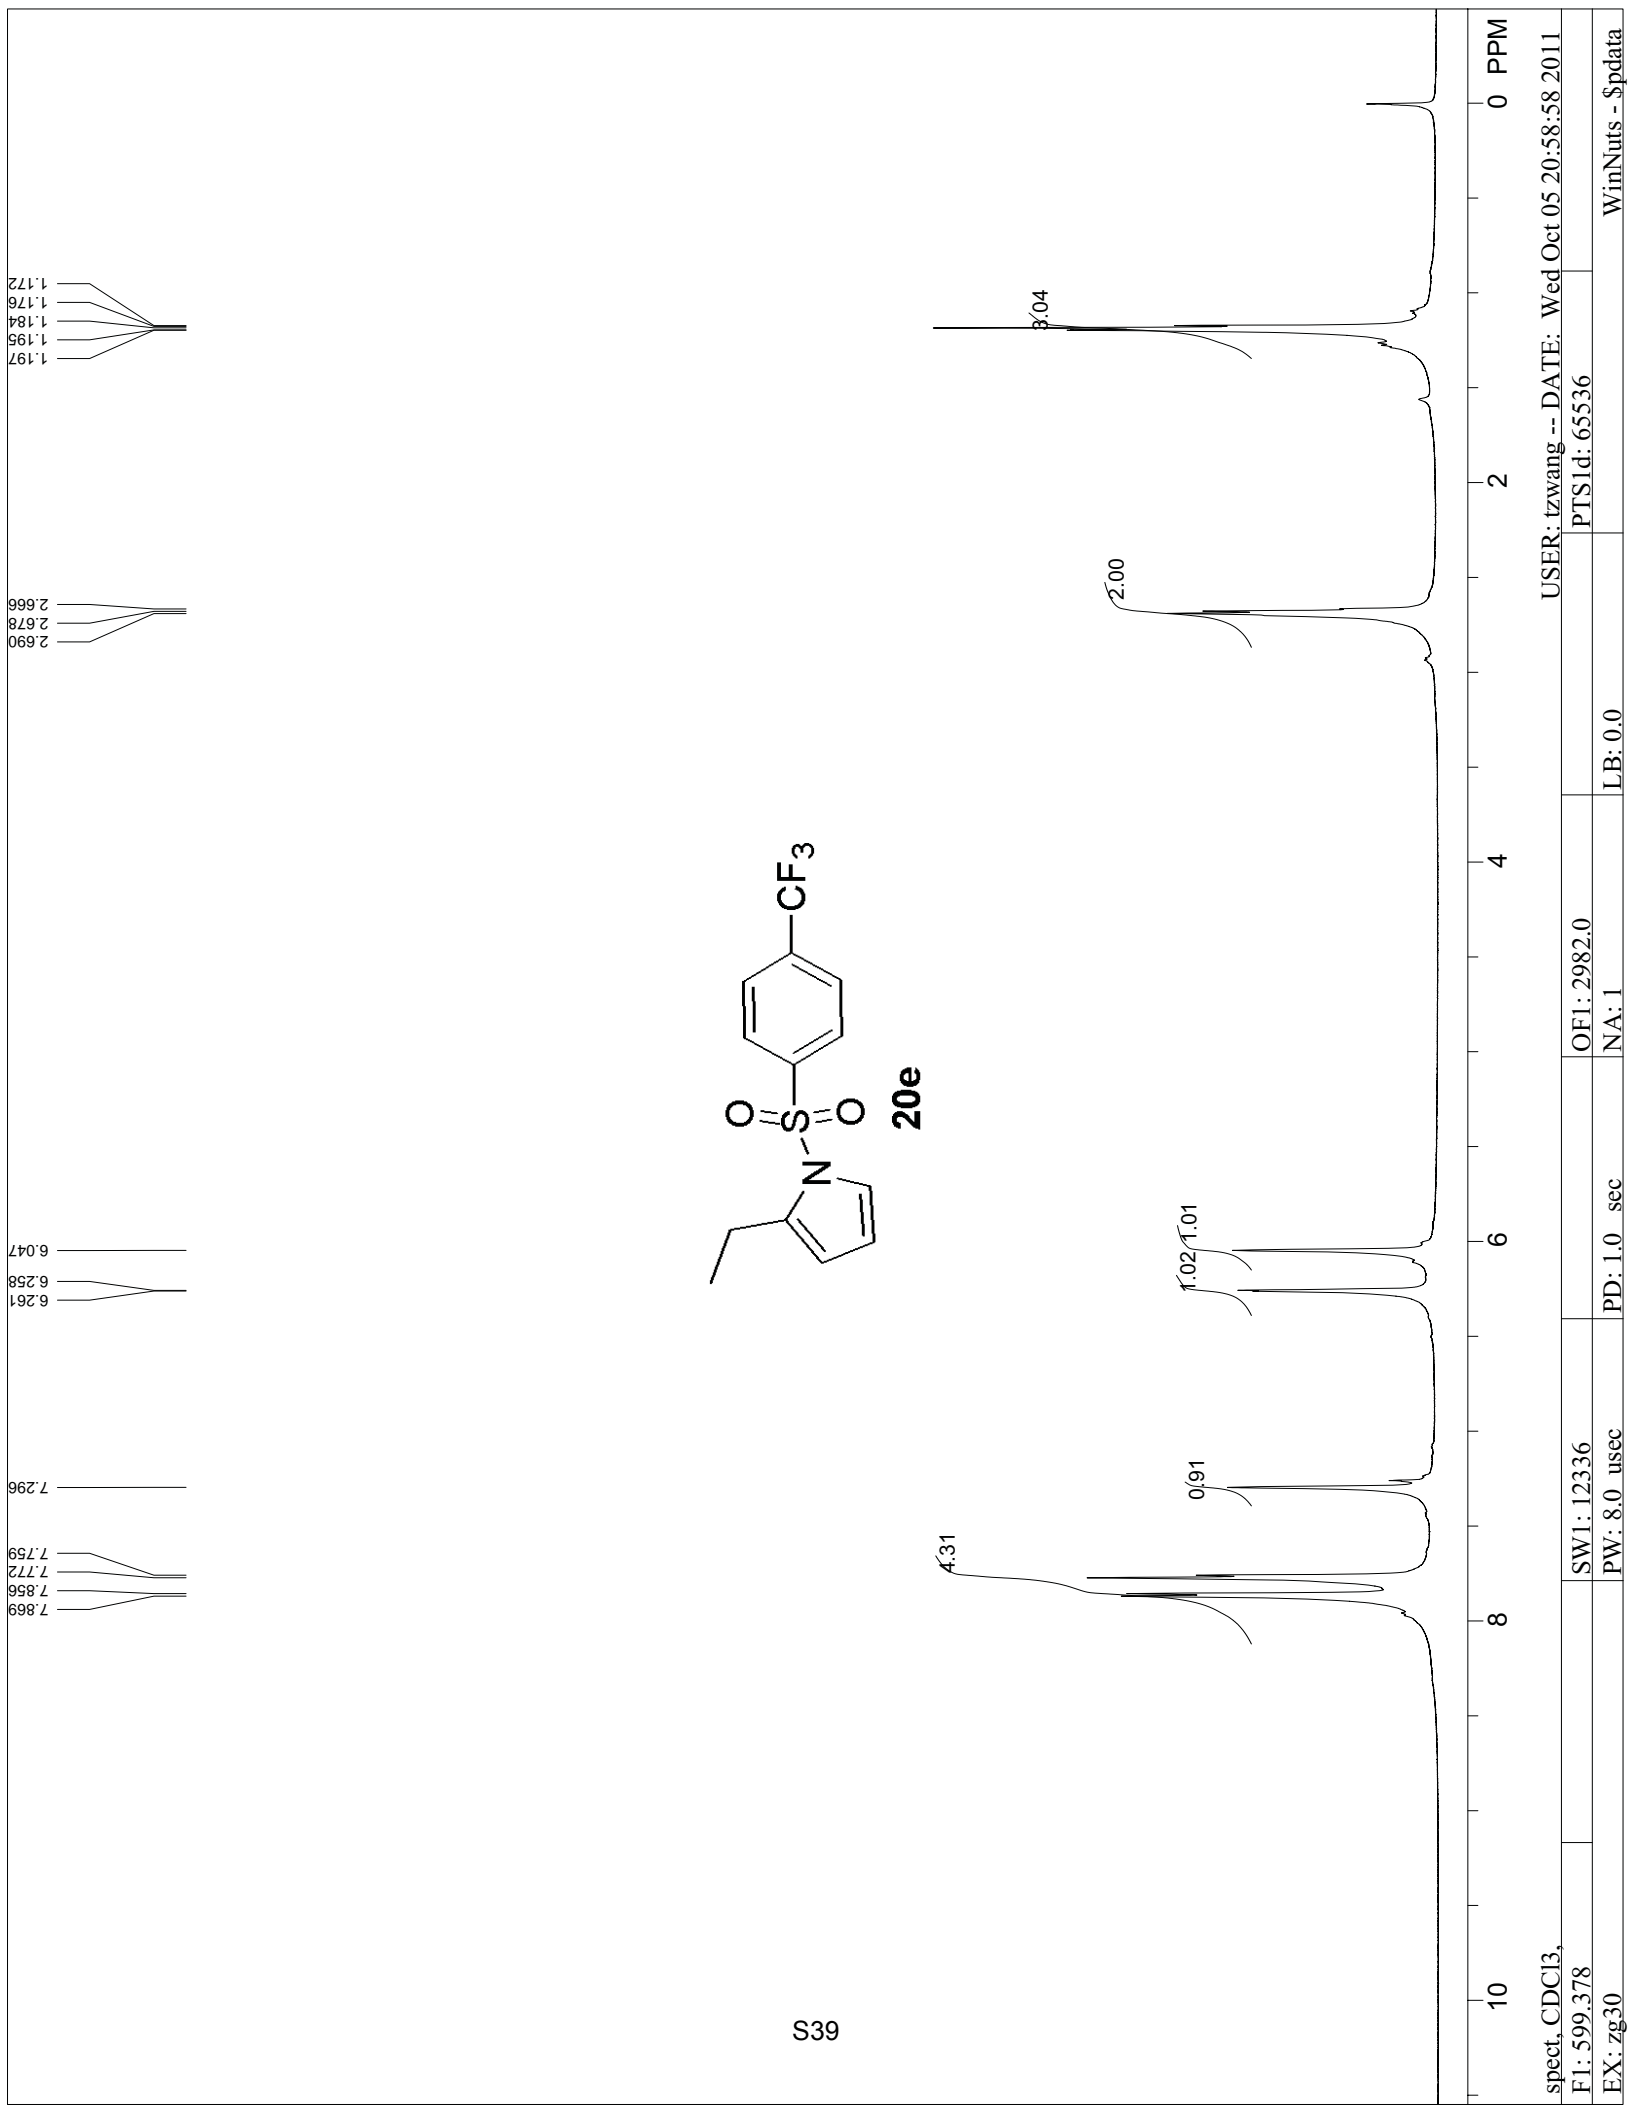

spect, CDCl3, USER: tzwang --- DATE: Wed Oct 05 20:58:58 2011  
 F1: 599.378 OF1: 2982.0 PTS1d: 65536  
 EX: zg30 PW: 8.0 usec PD: 1.0 sec NA: 1 LB: 0.0 WinNuts - \$pdata

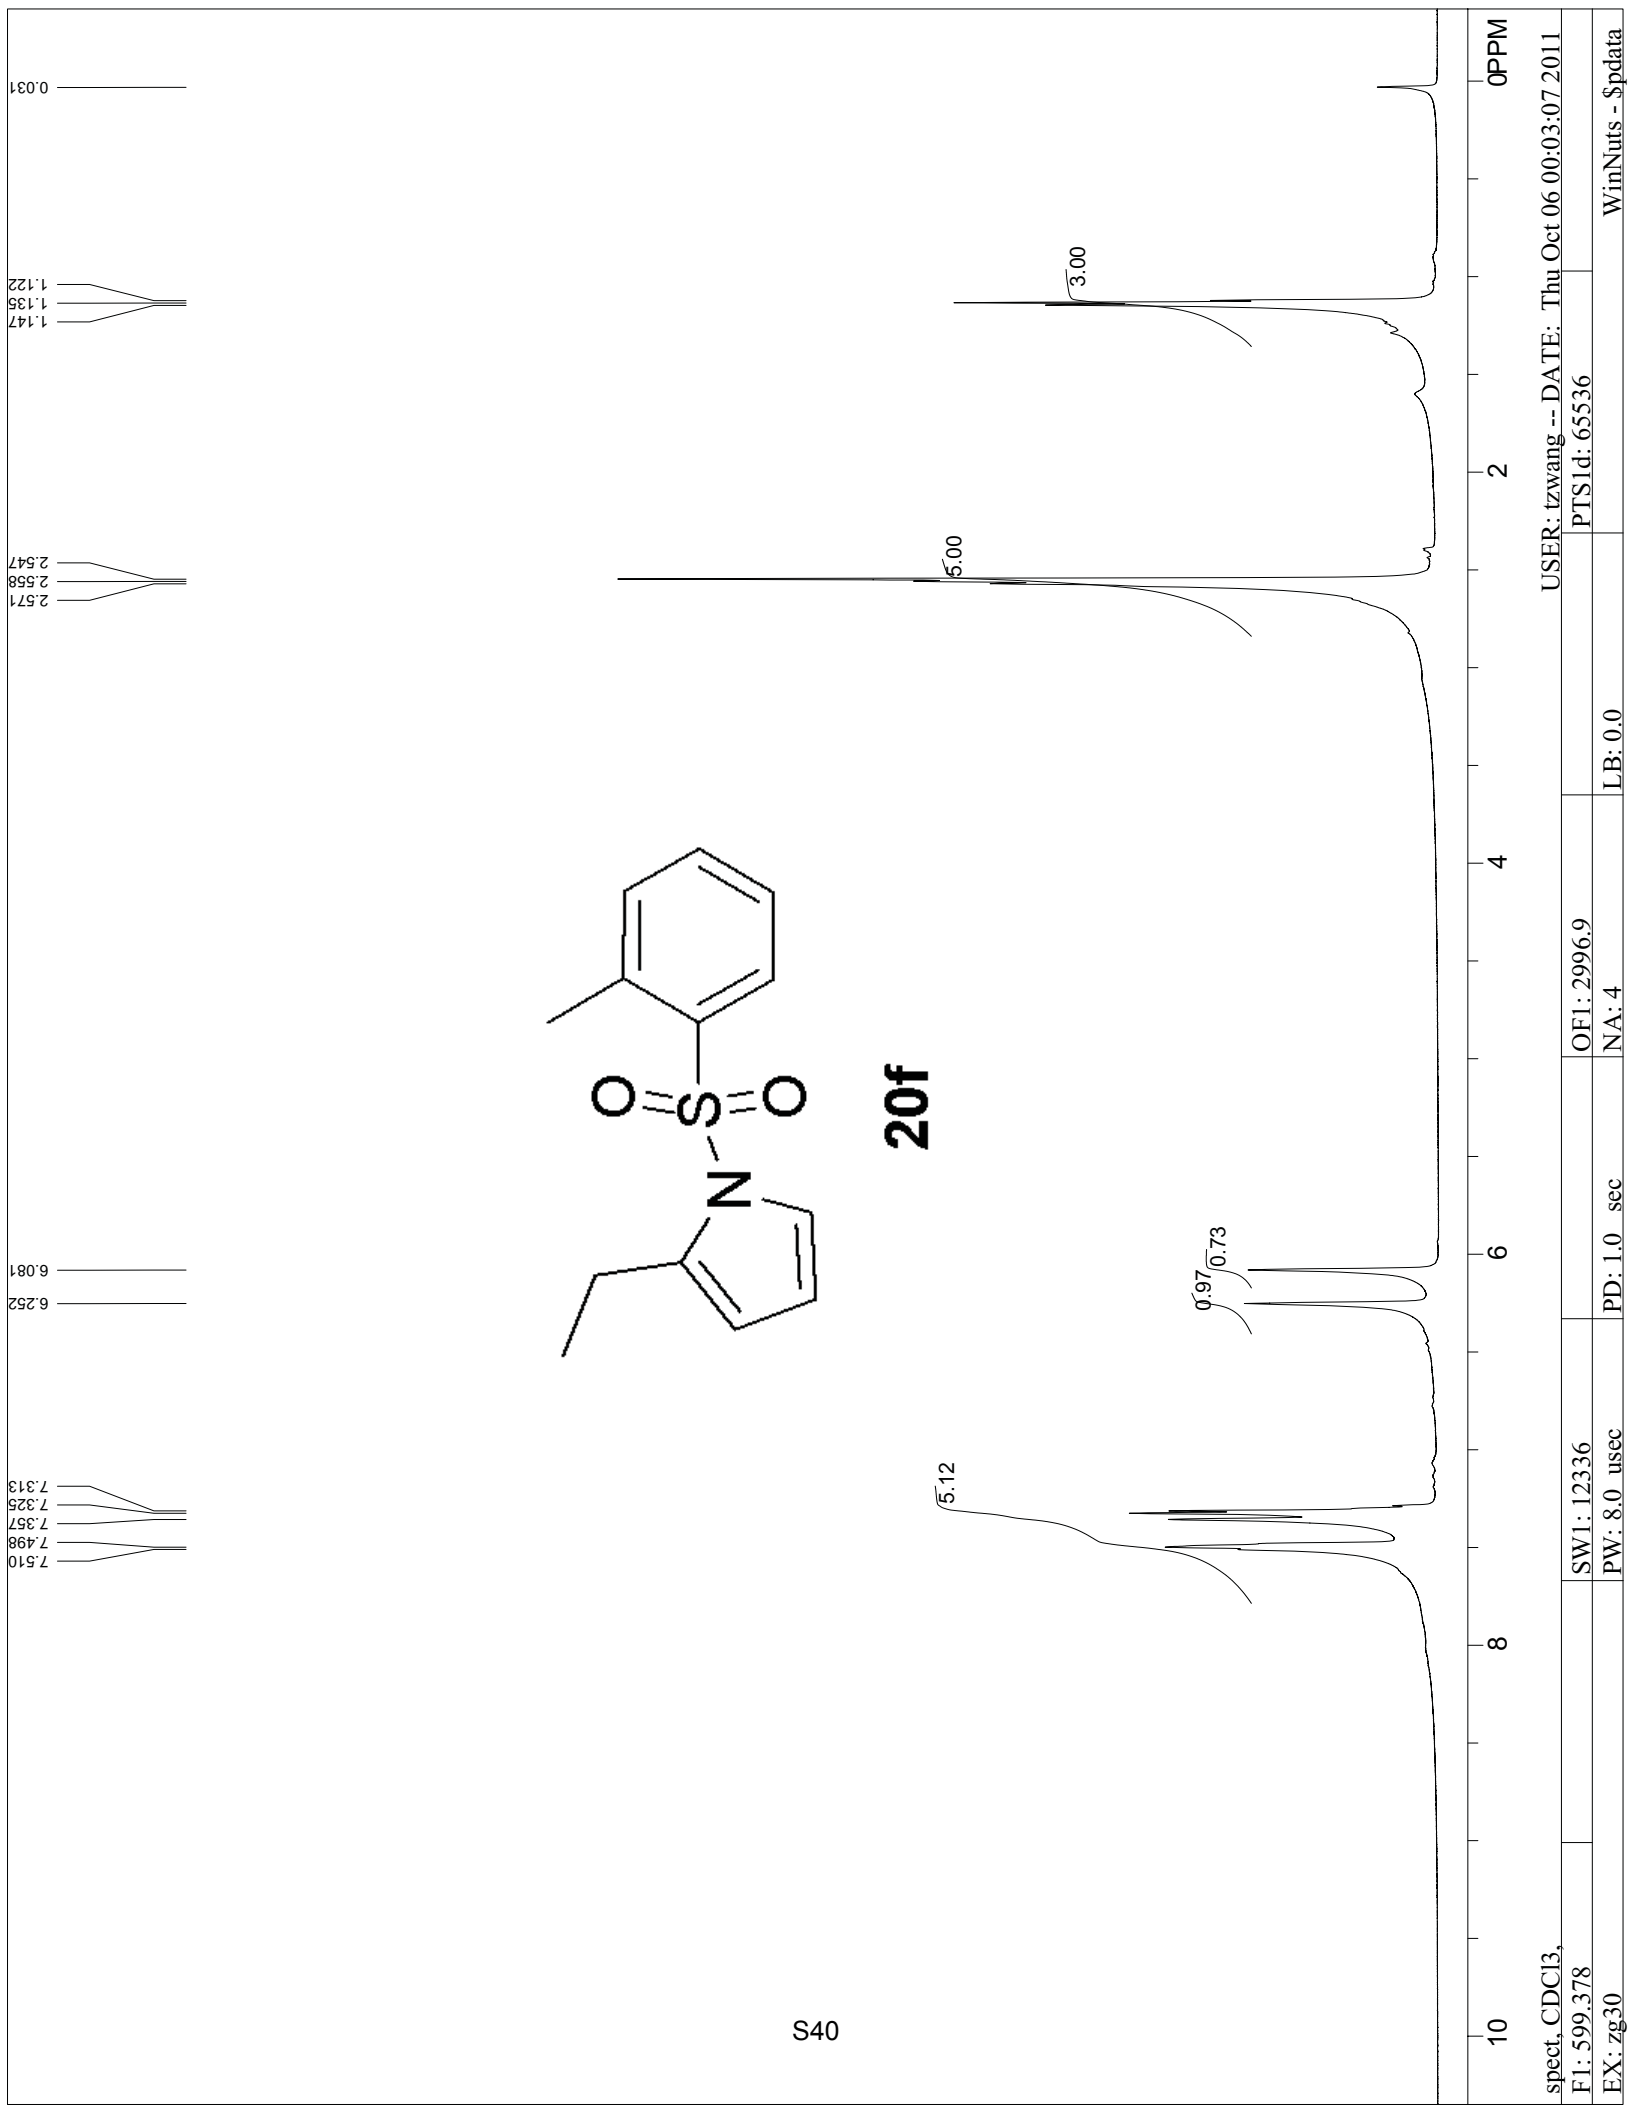

spect. CDCl3, F1: 599.378, EX: zg30, SW1: 12336, PW: 8.0 usec, OF1: 2996.9, NA: 4, PD: 1.0 sec, LB: 0.0, PTS1d: 65536, WinNuts - \$pdata, USER: tzwang -- DATE: Thu Oct 06 00:03:07 2011



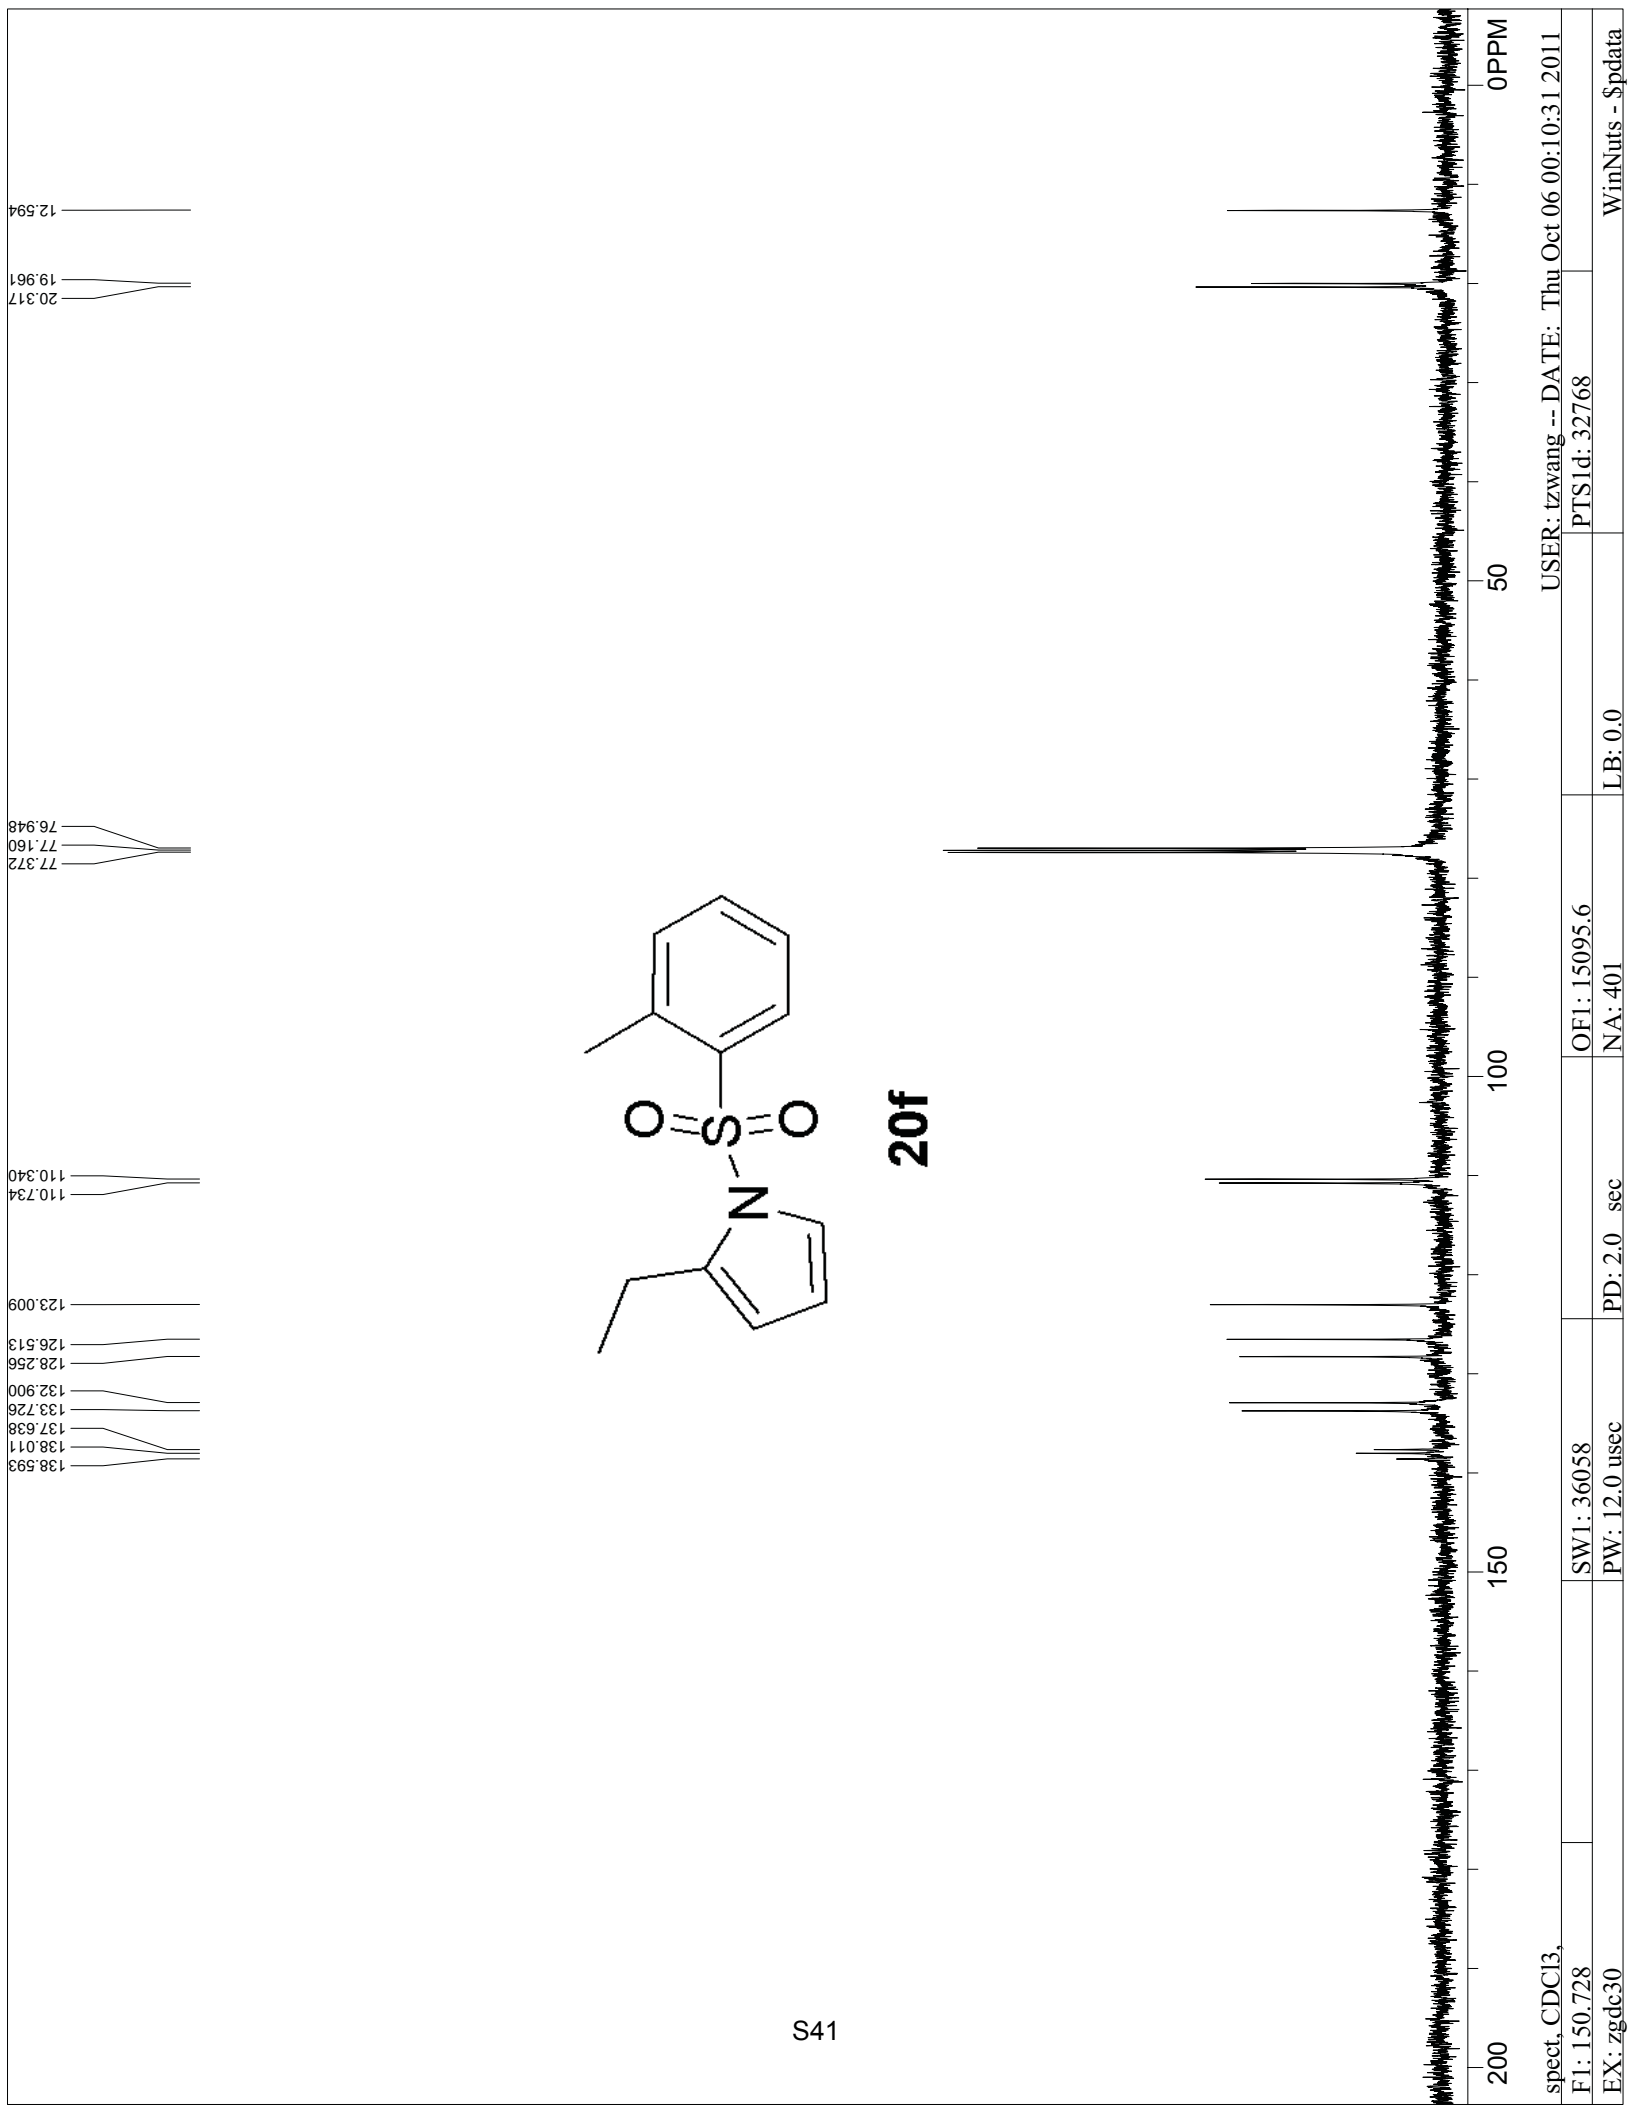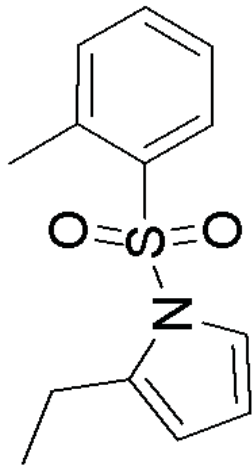

20f

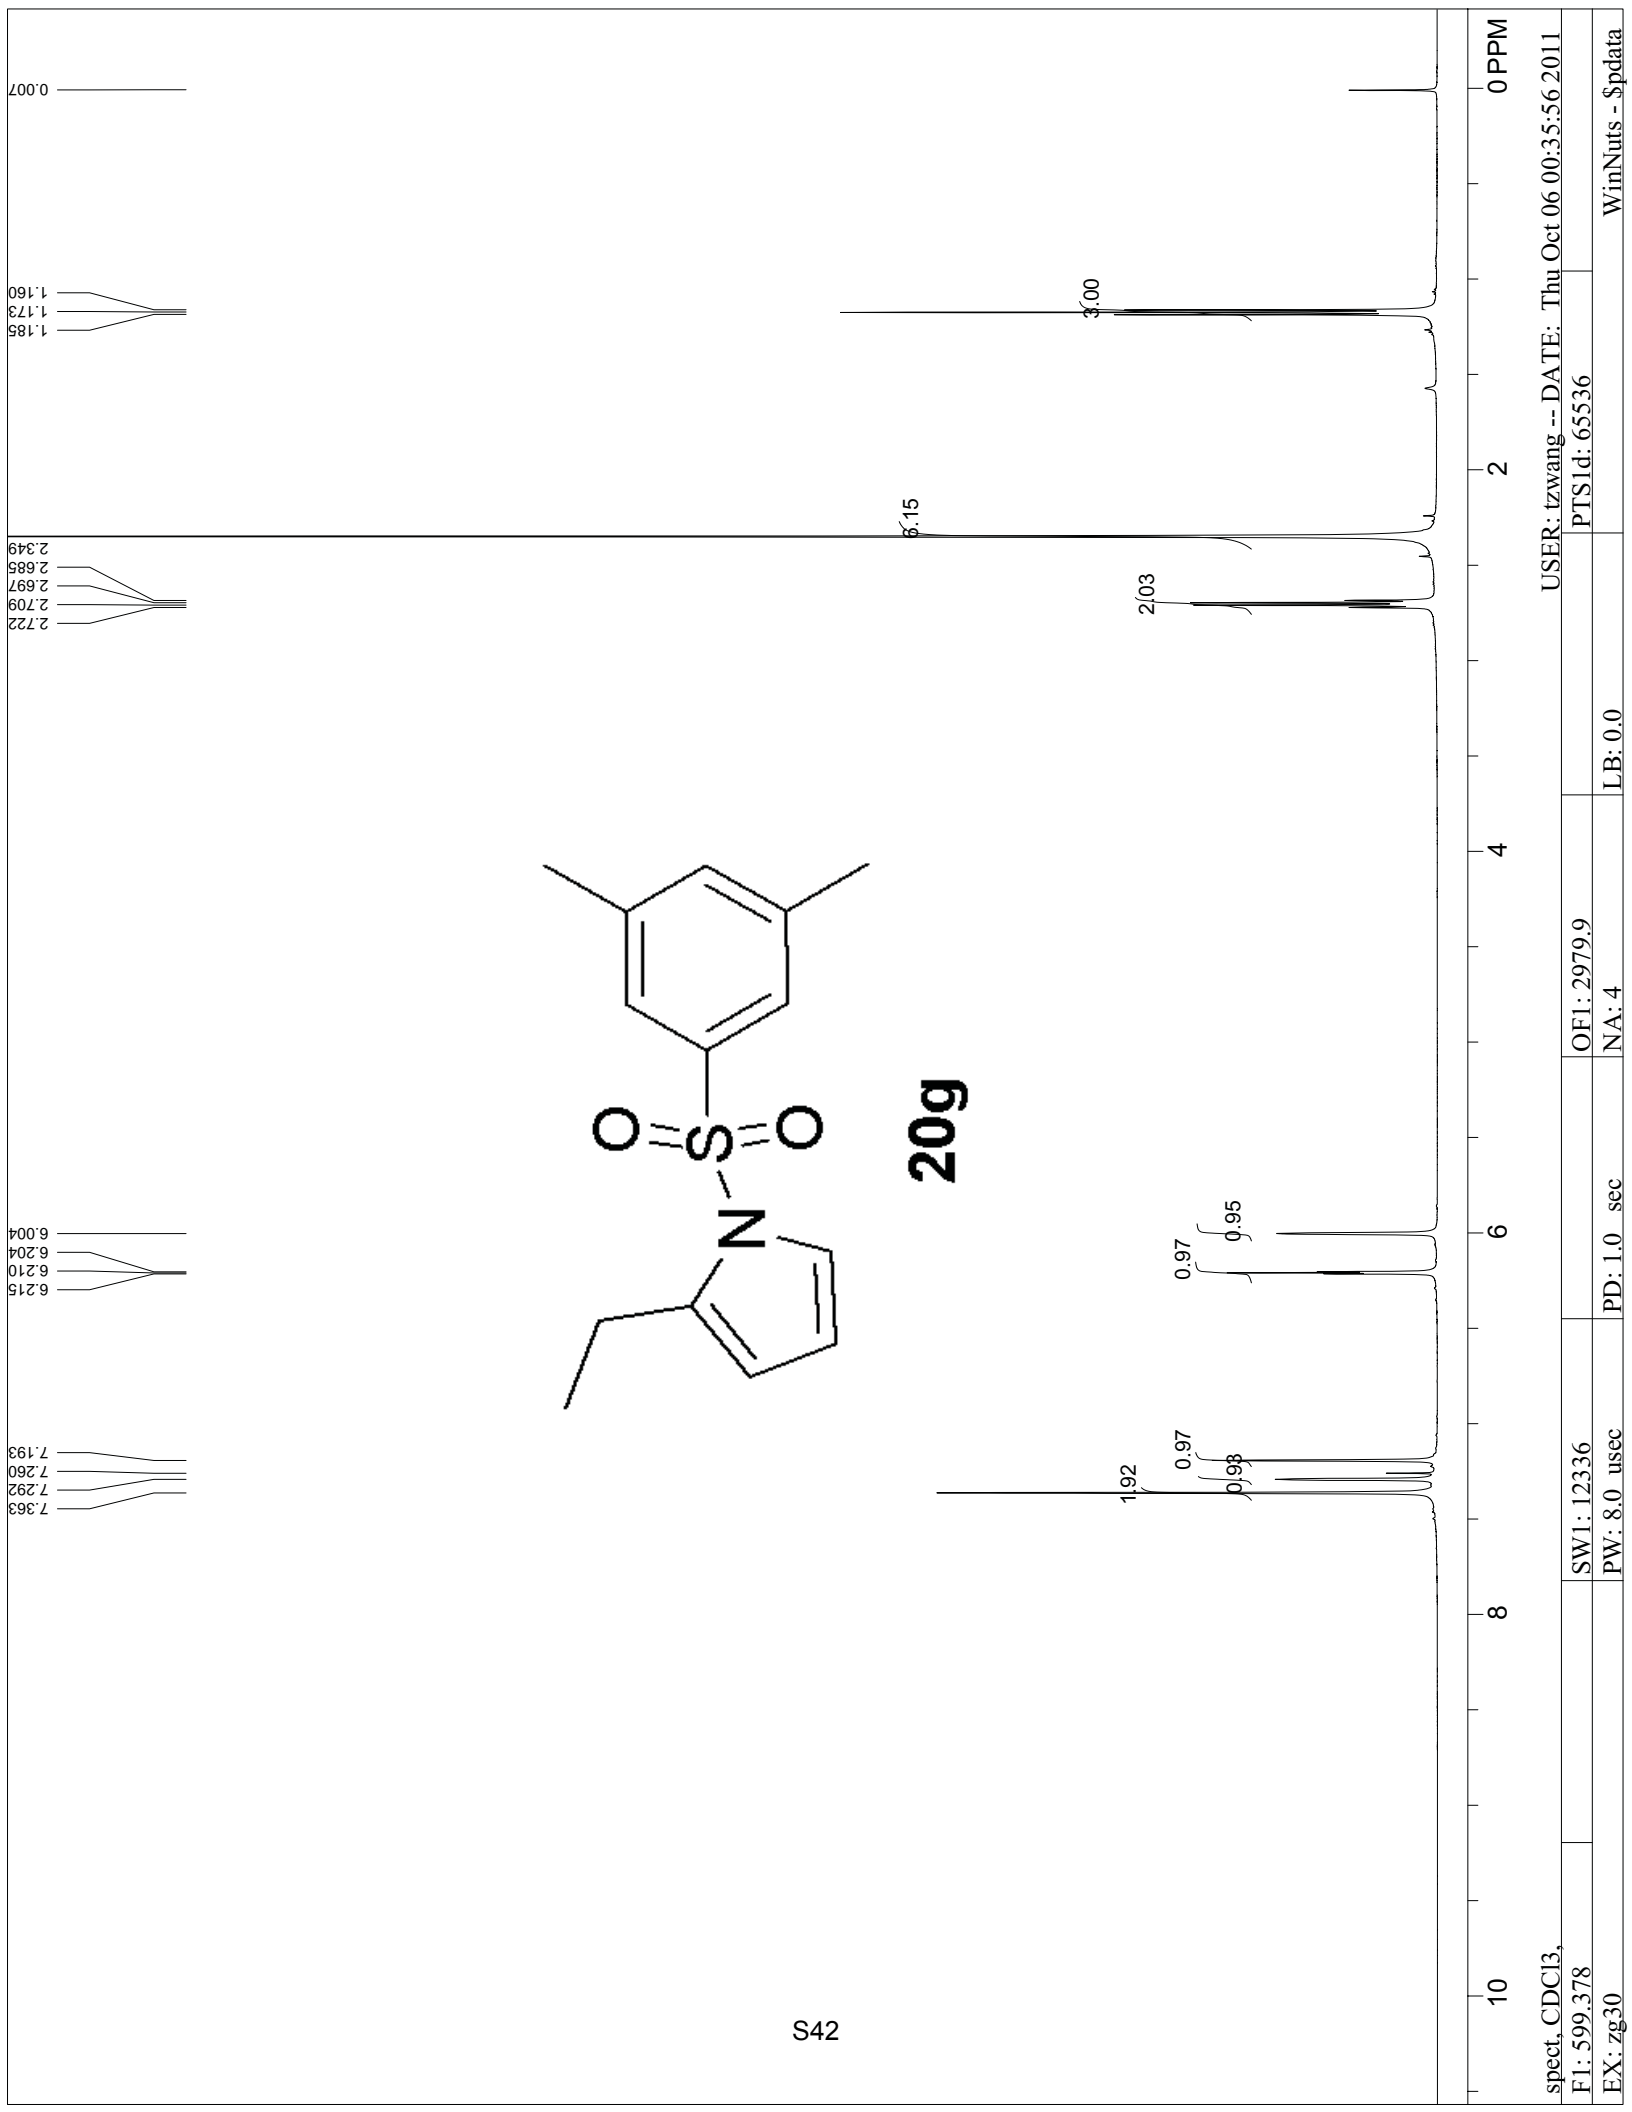

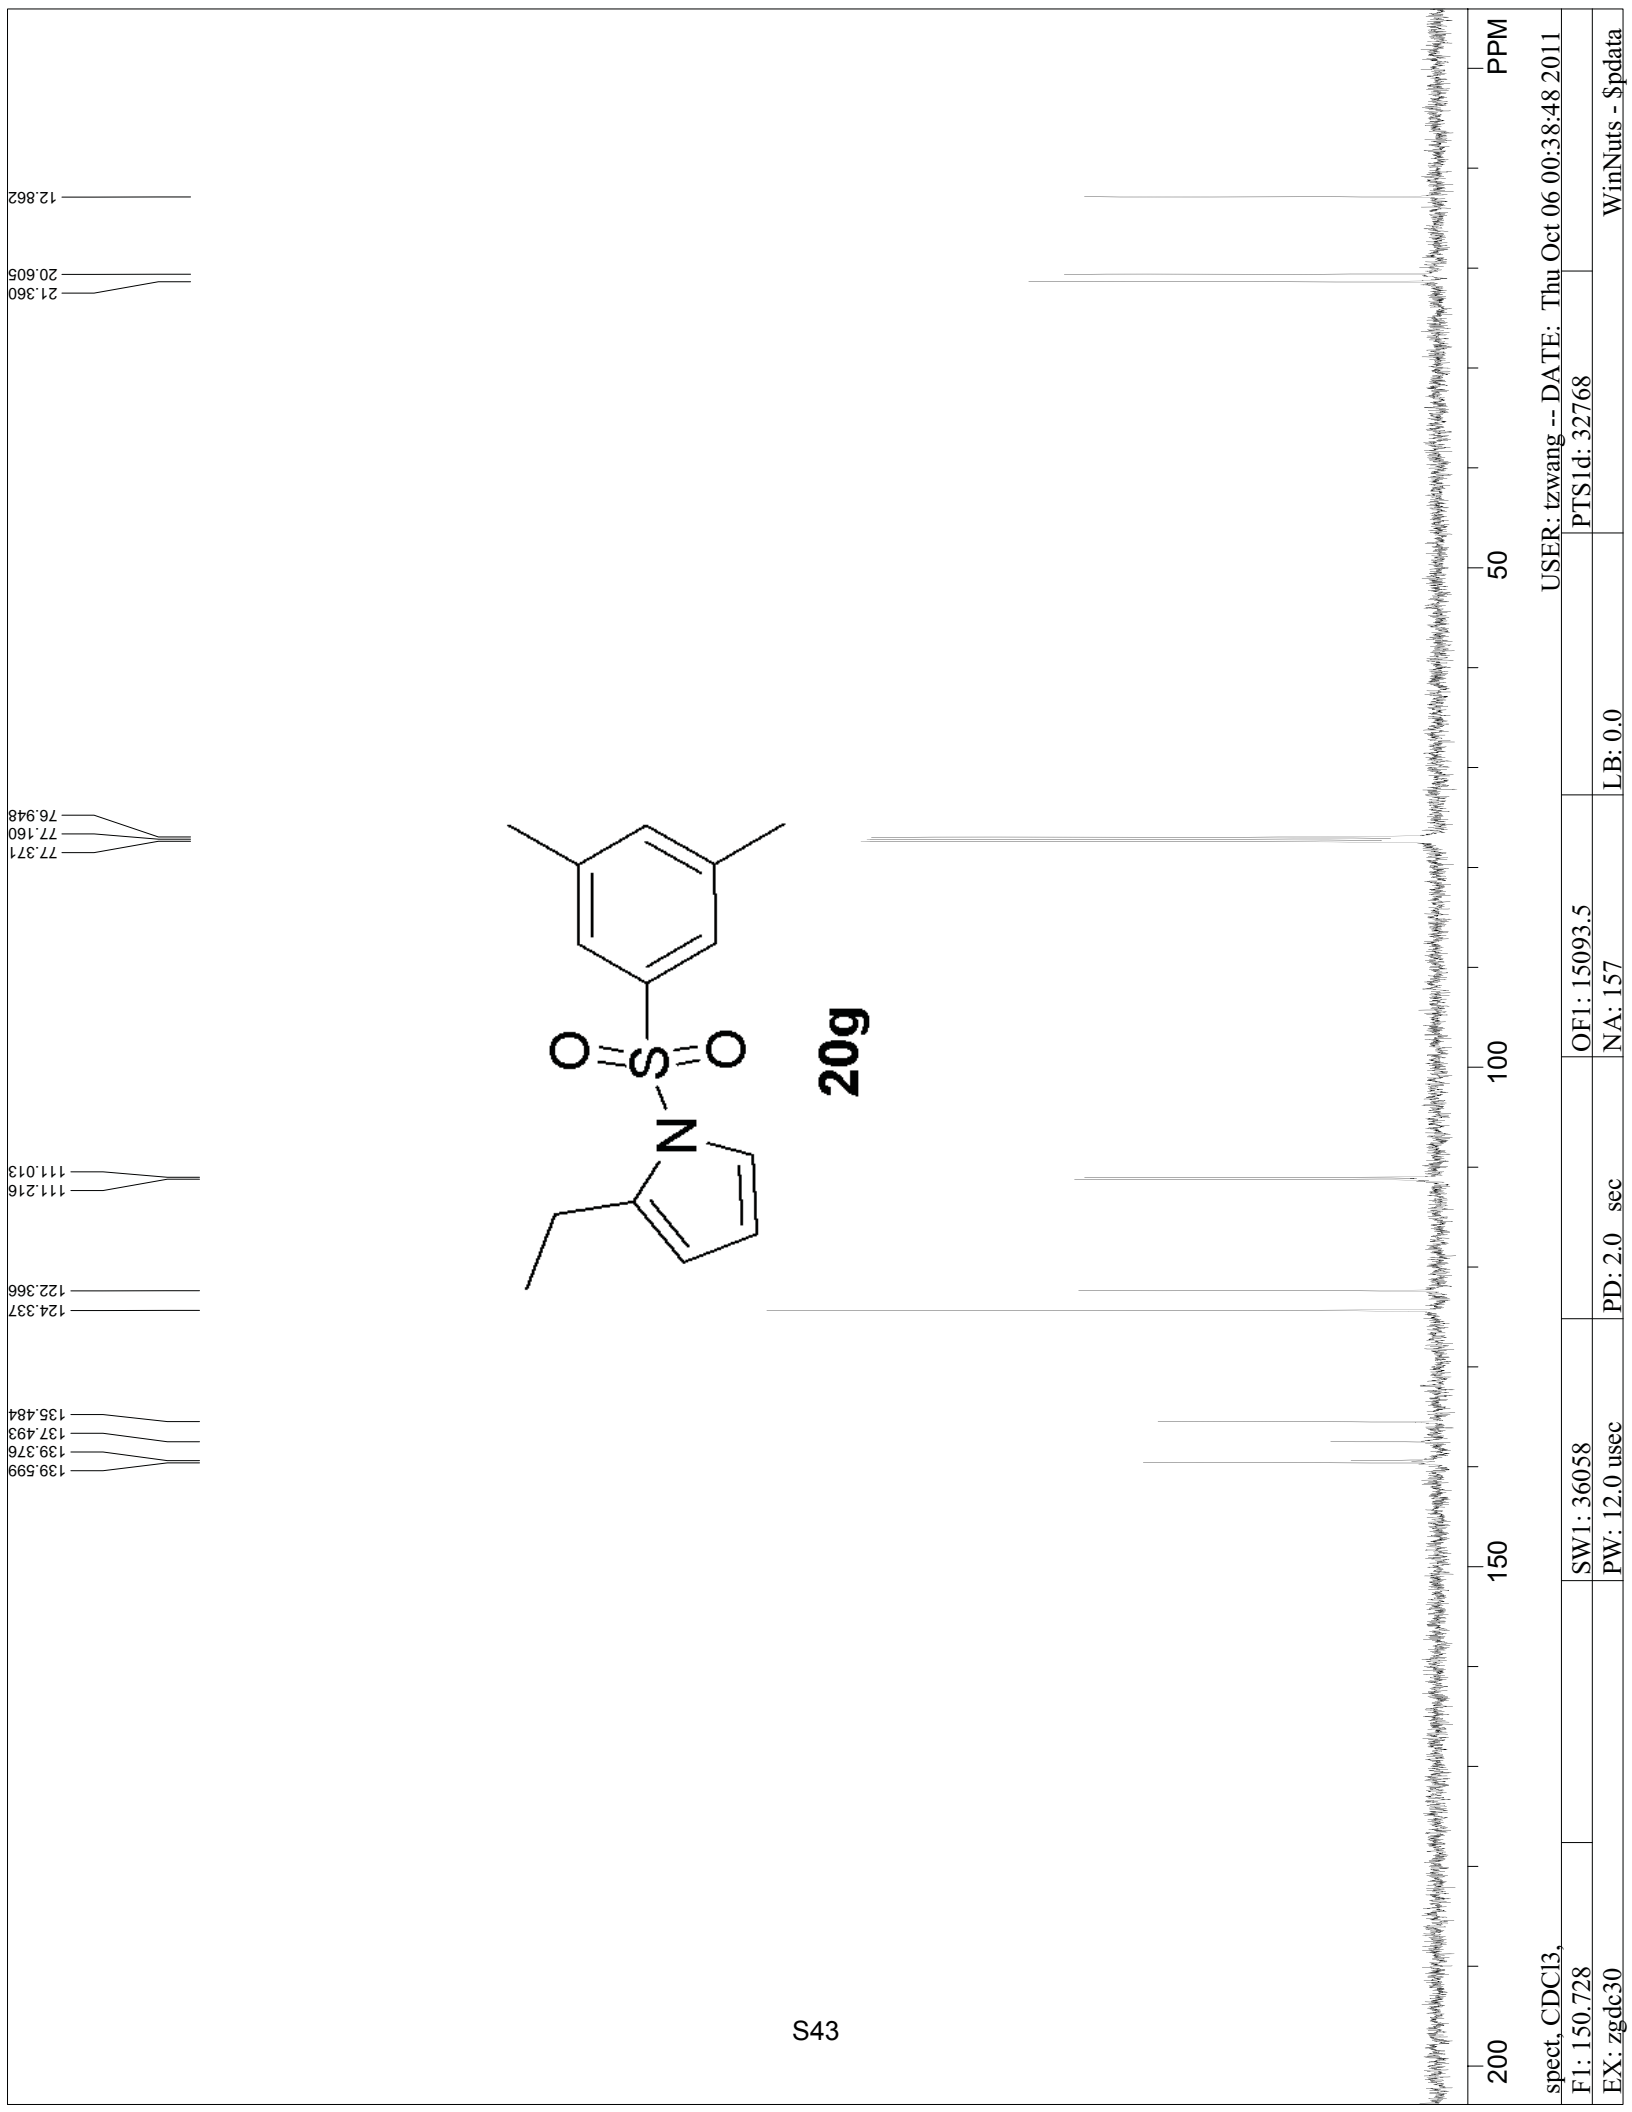

PPM

50

100

150

200

spect, CDCI3, USER: tzwang -- DATE: Thu Oct 06 00:38:48 2011

F1: 150.728 OF1: 15093.5 PTS1d: 32768

EX: zgdc30 PD: 2.0 sec LB: 0.0 WinNuts - \$pdata

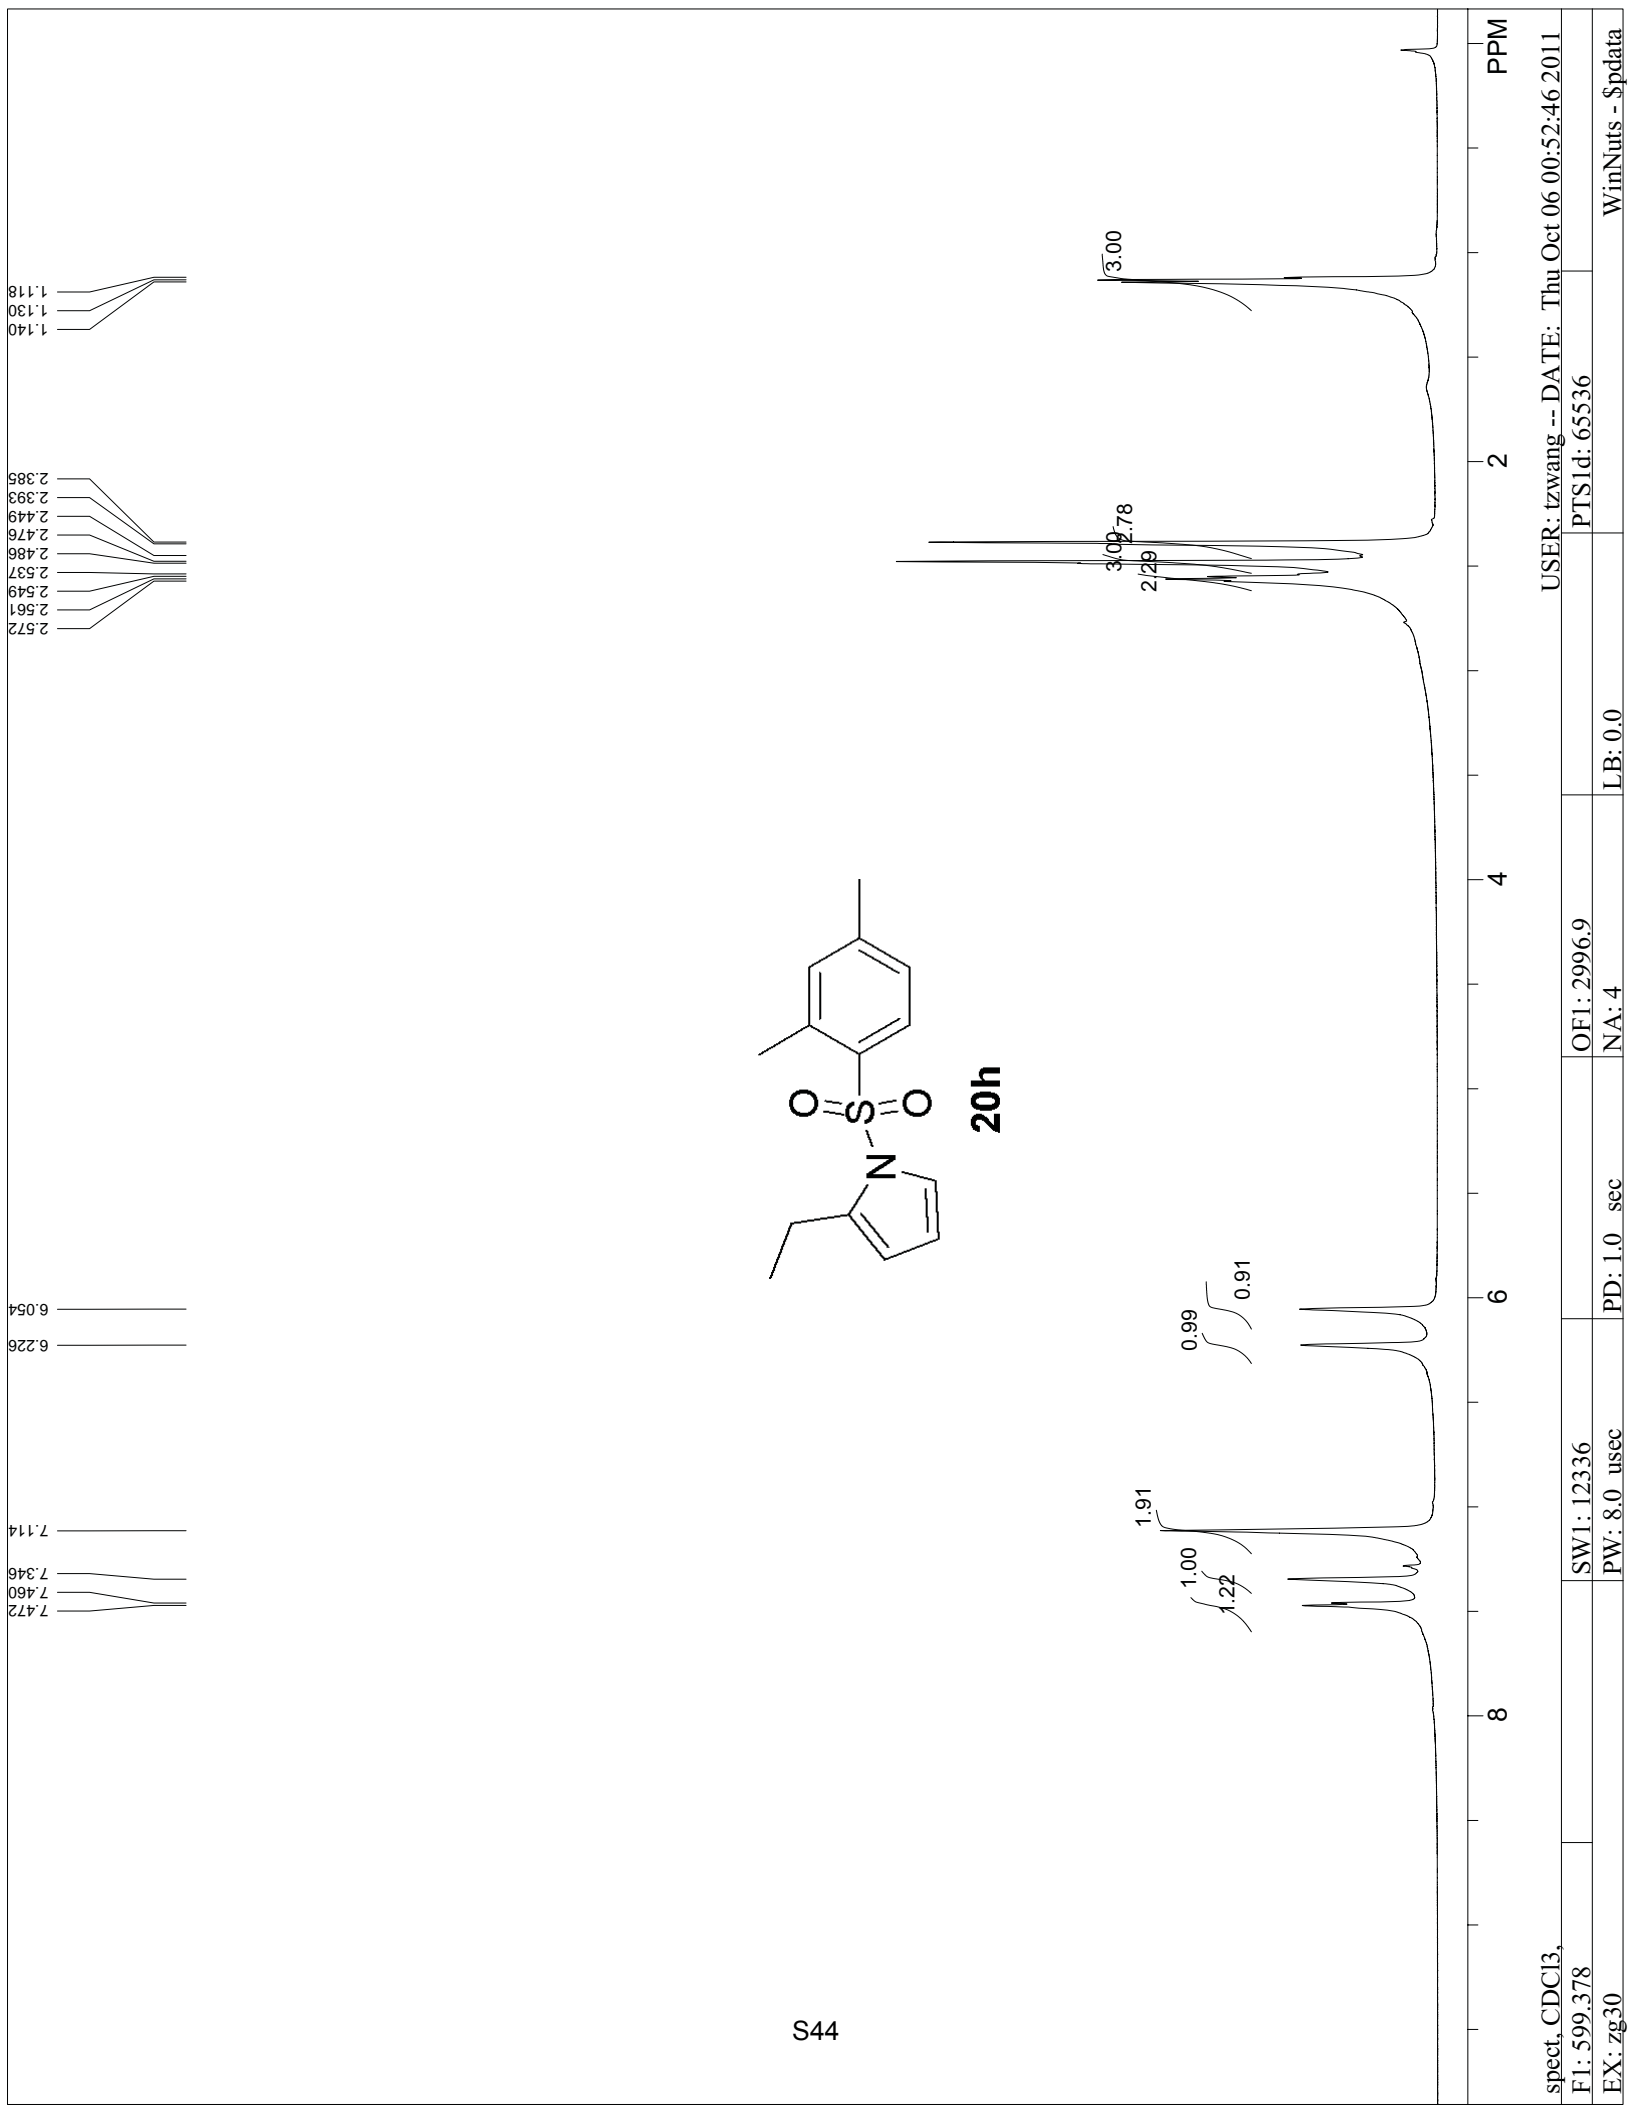

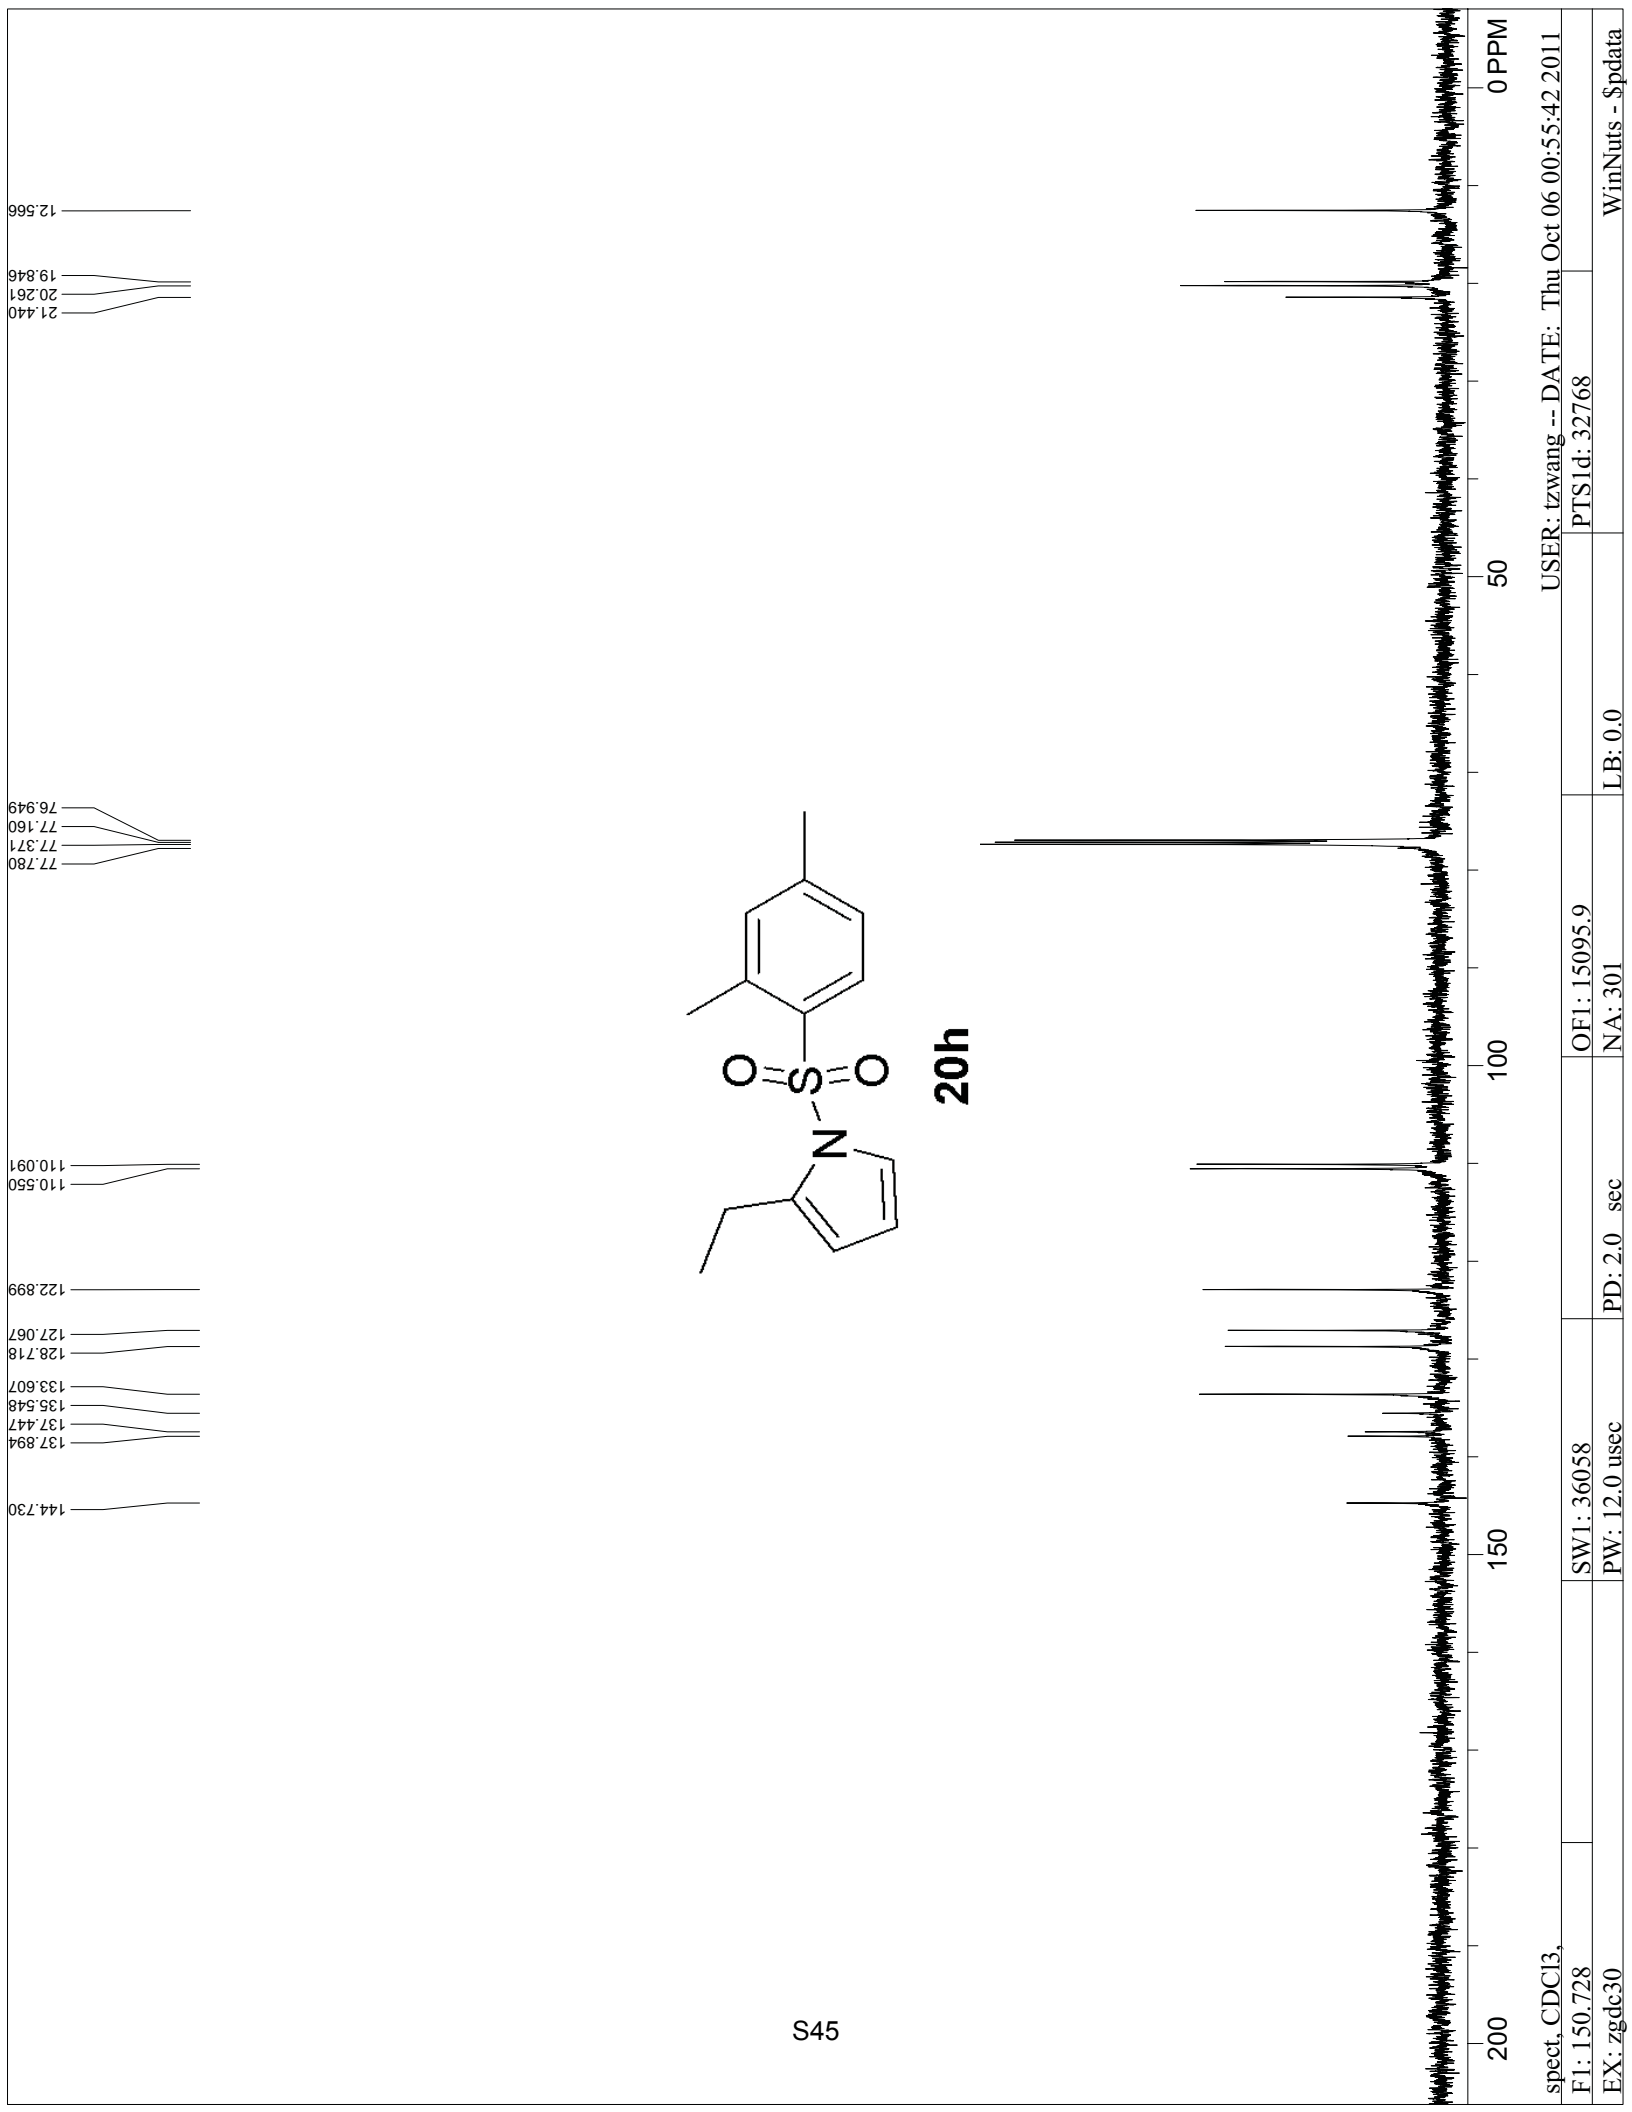

spect, CDCI3, USER: tzvwang -- DATE: Thu Oct 06 00:55:42 2011  
 F1: 150.728 OF1: 15095.9 PTS1d: 32768  
 EX: zgdc30 PD: 2.0 sec NA: 301 LB: 0.0 WinNuts - \$pdata

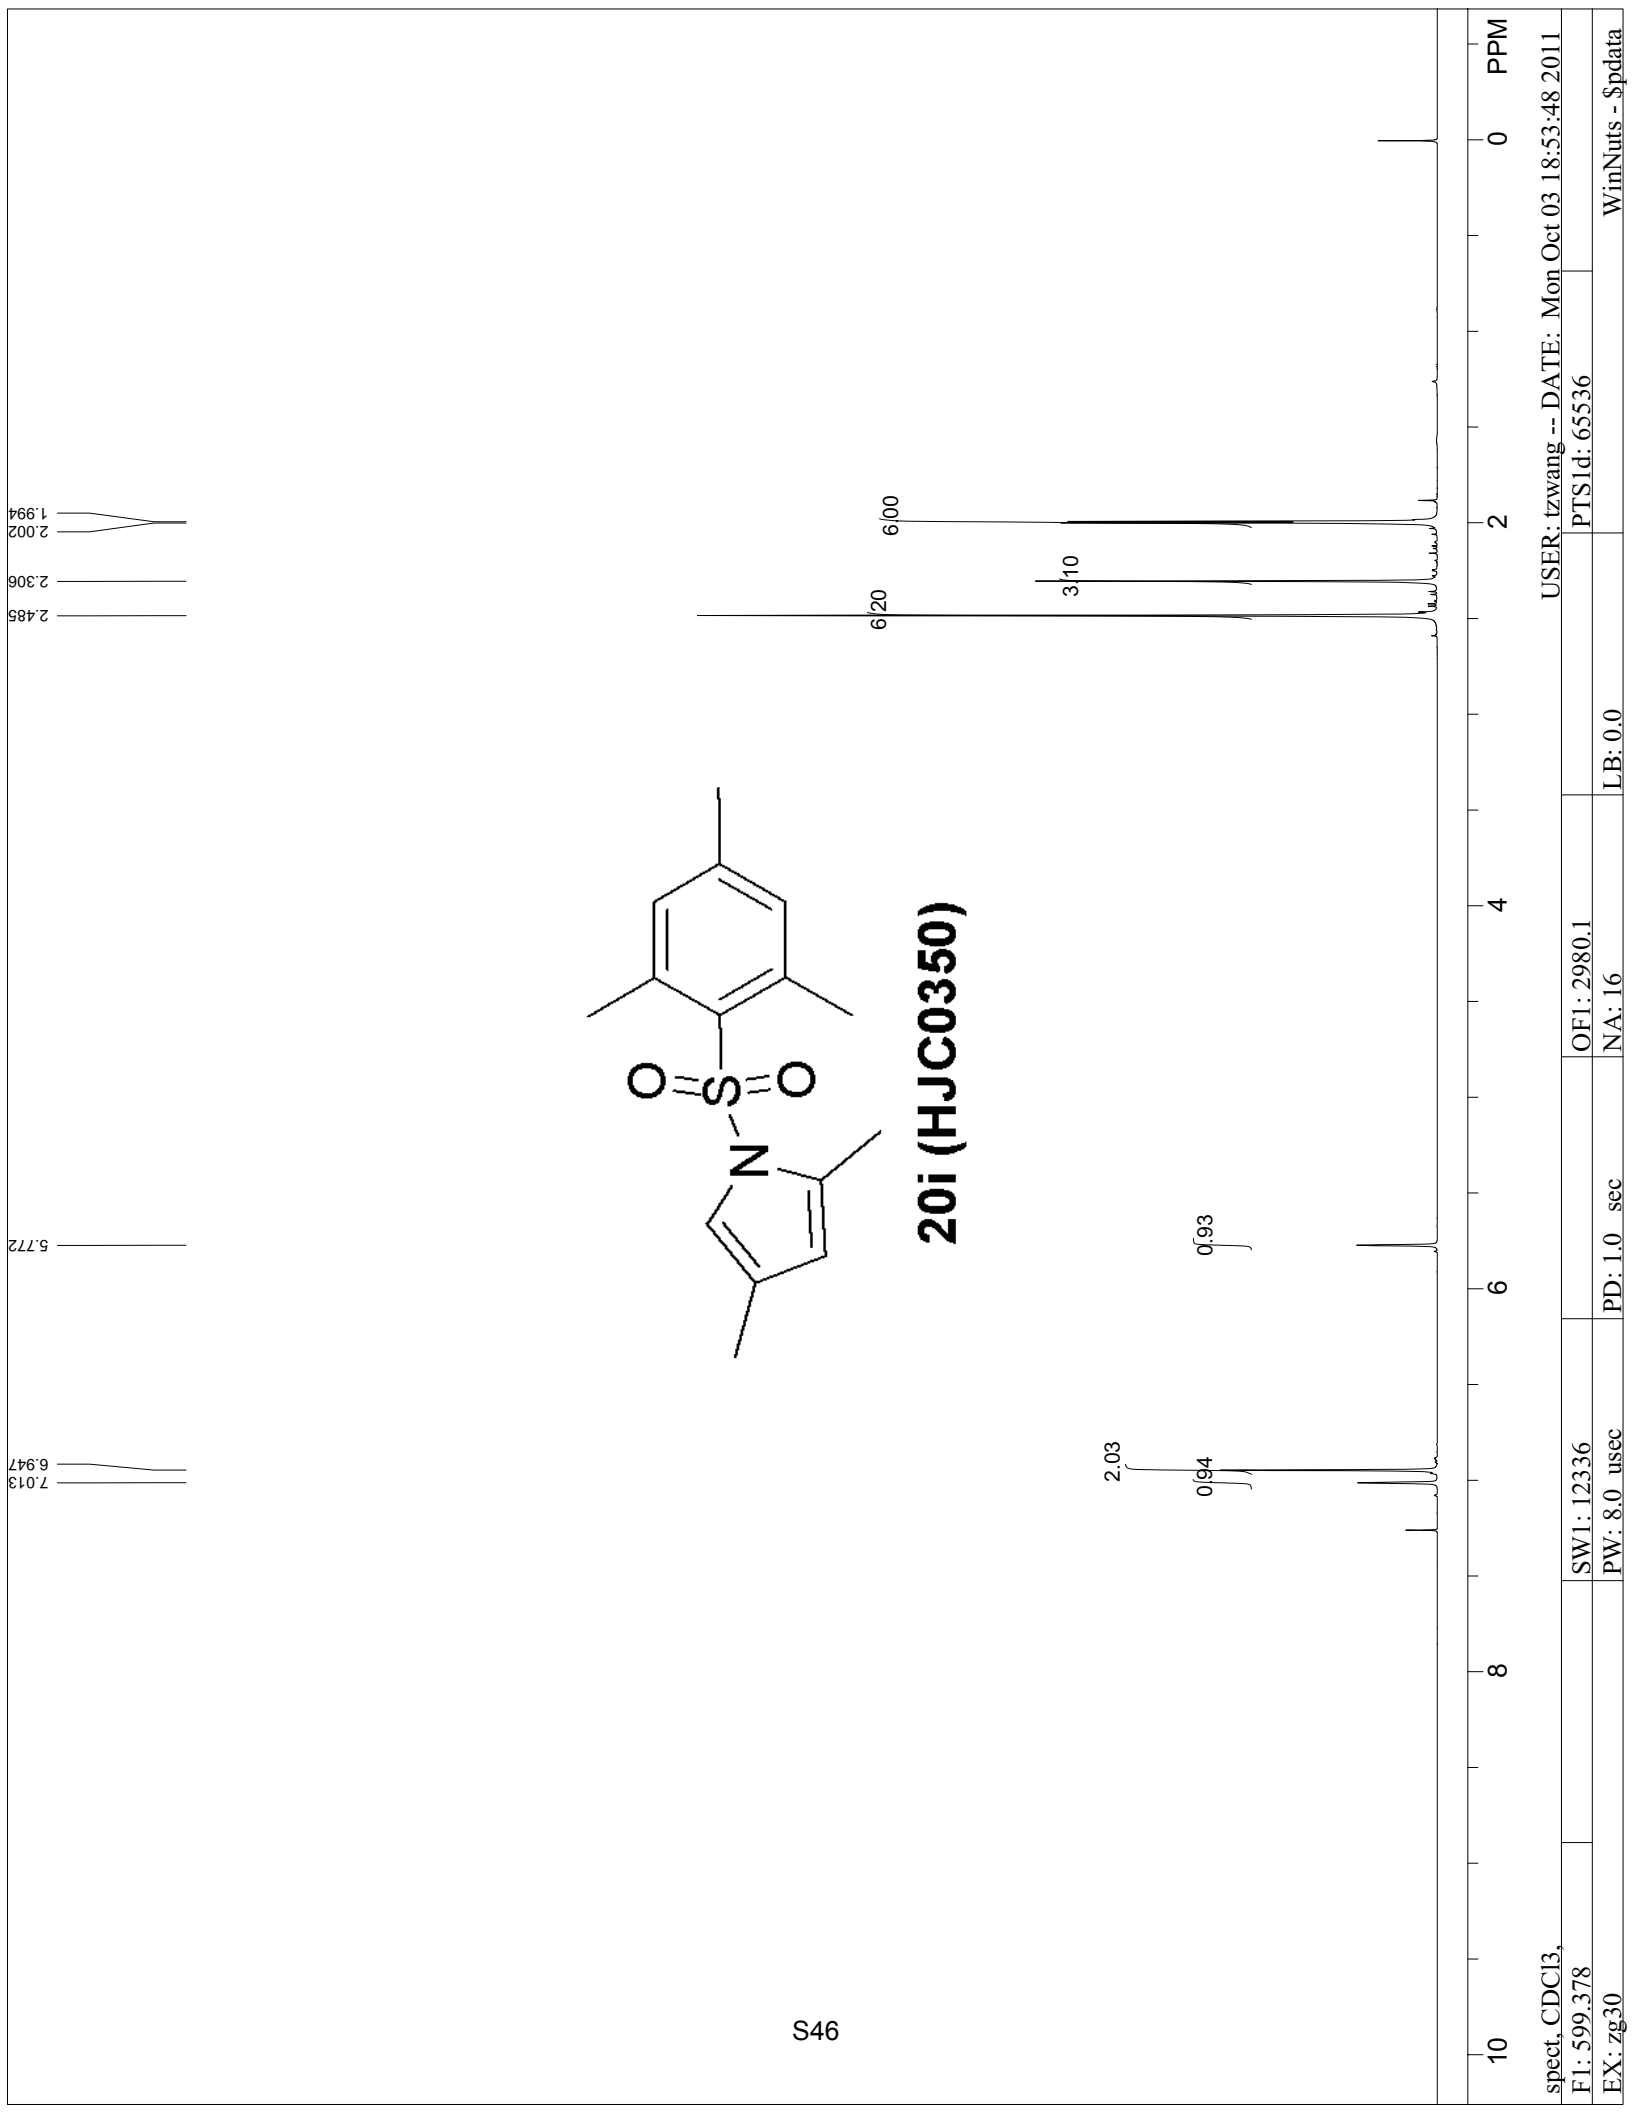

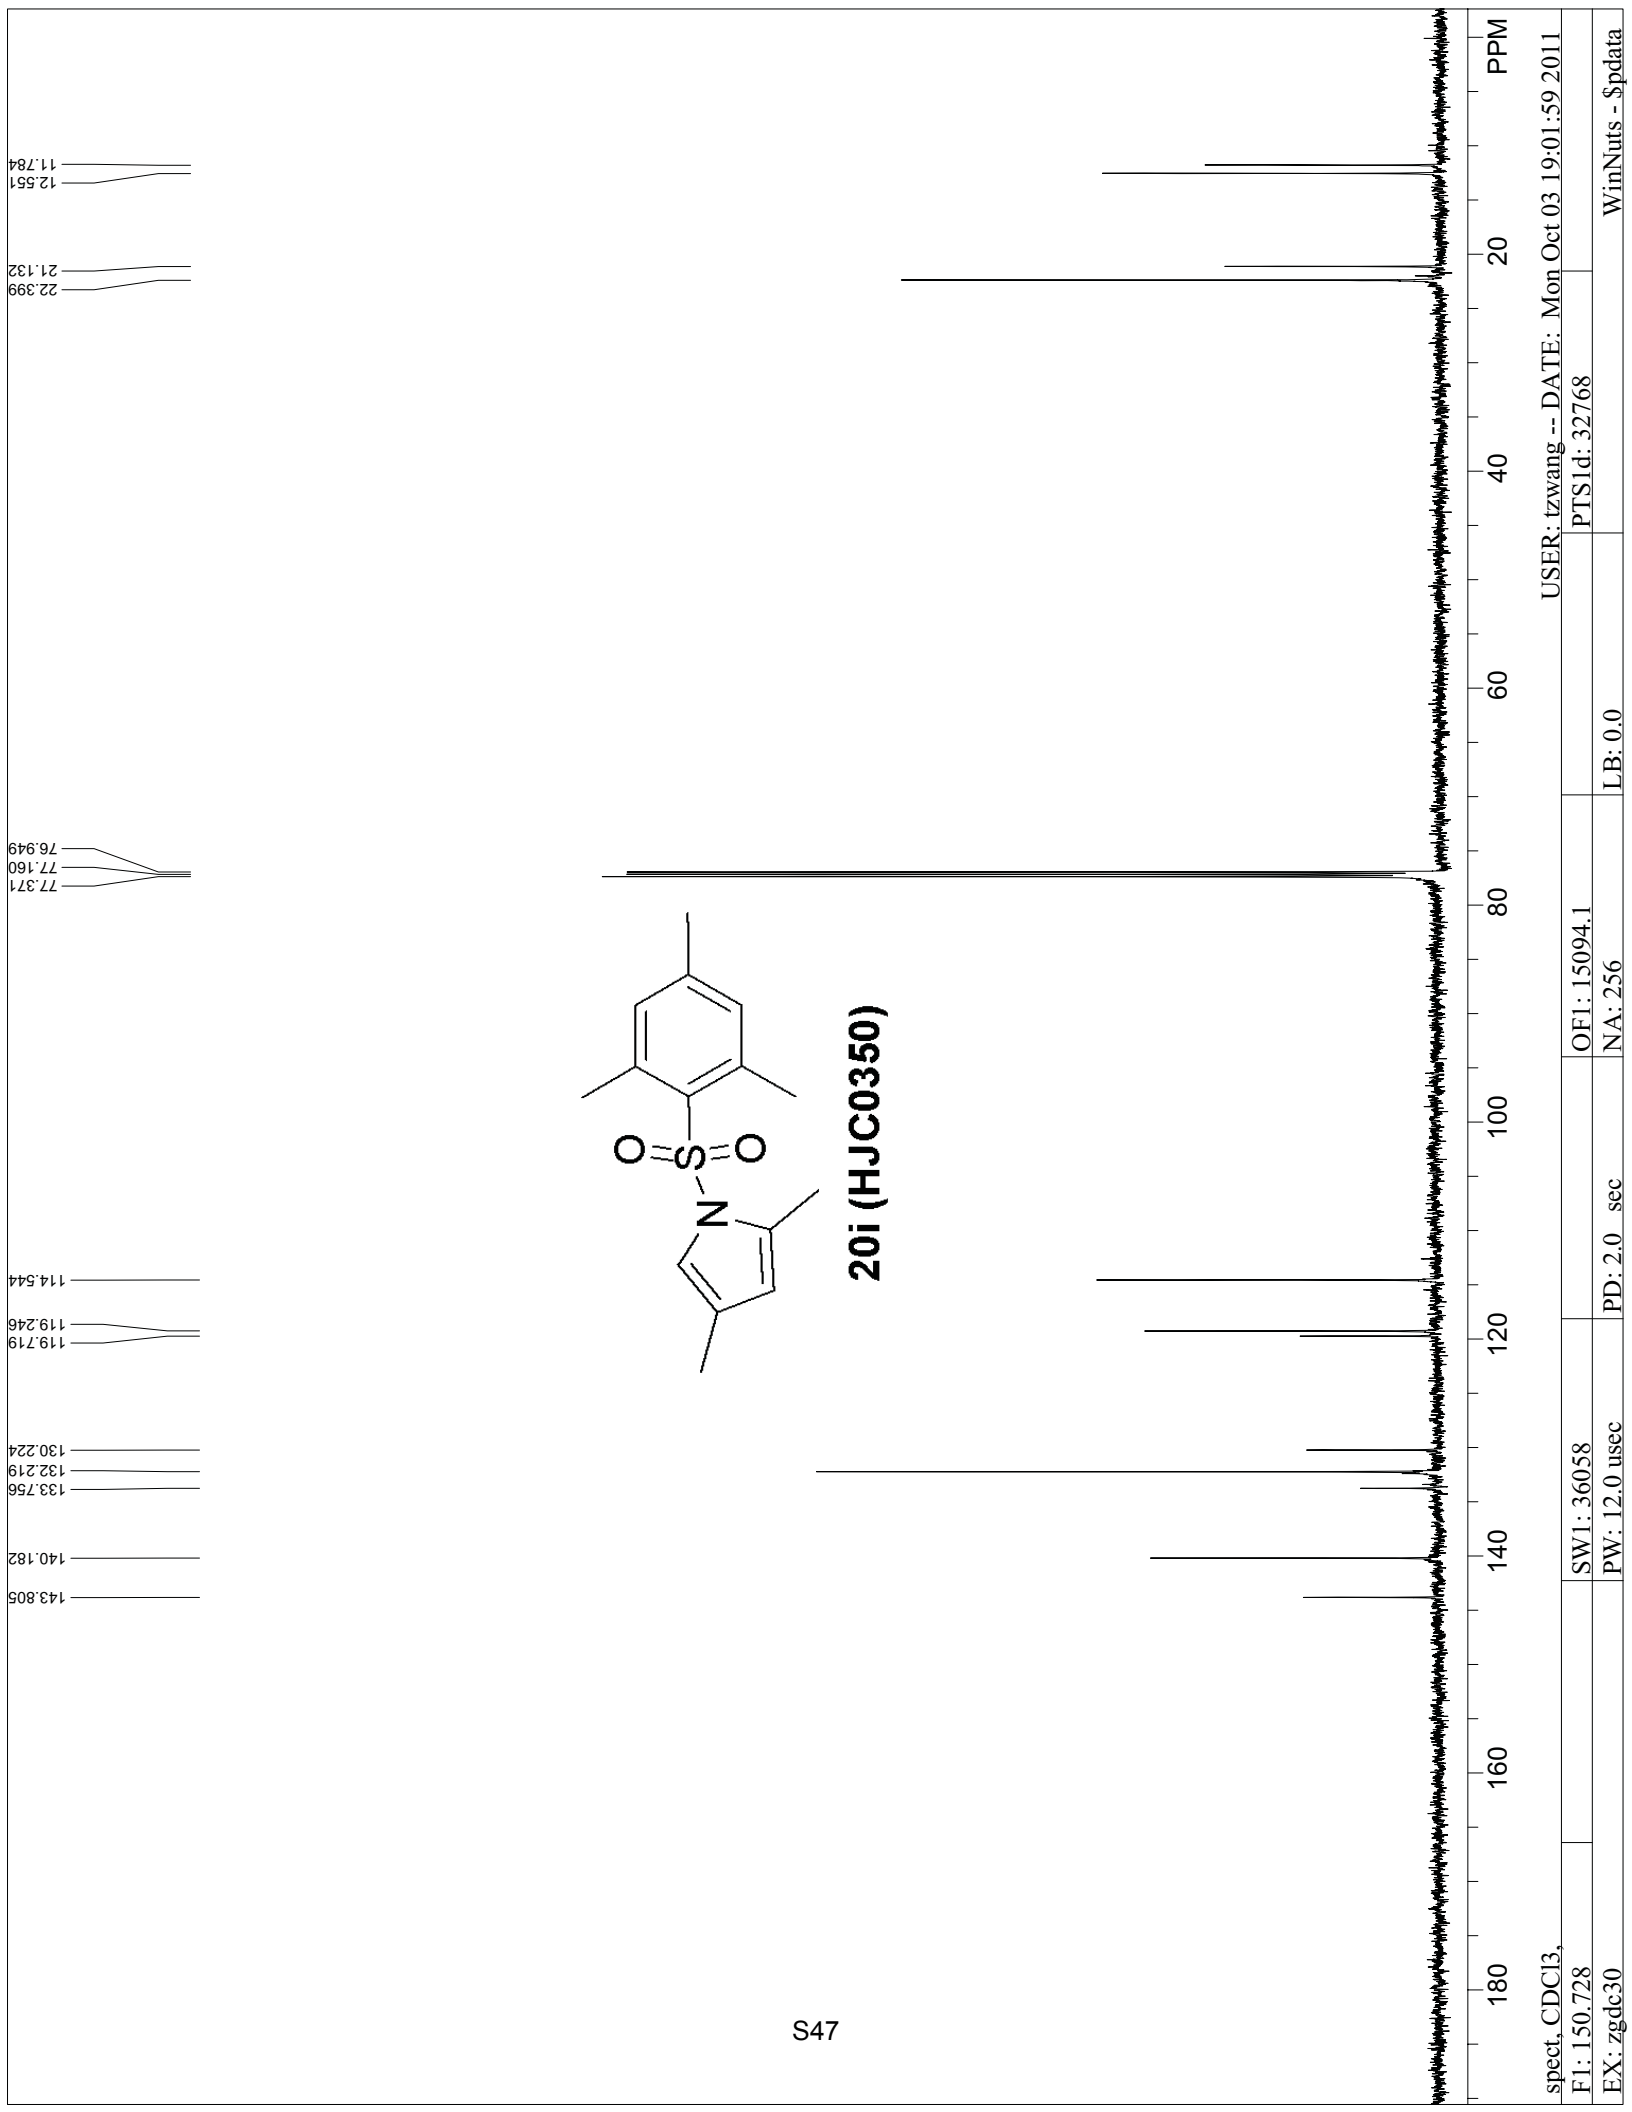

spect, CDCI3, USER: tzwang -- DATE: Mon Oct 03 19:01:59 2011  
 F1: 150.728 OF1: 15094.1 PTS1d: 32768  
 EX: zgdc30 PW: 12.0 usec PD: 2.0 sec LB: 0.0 WinNuts - \$pdata

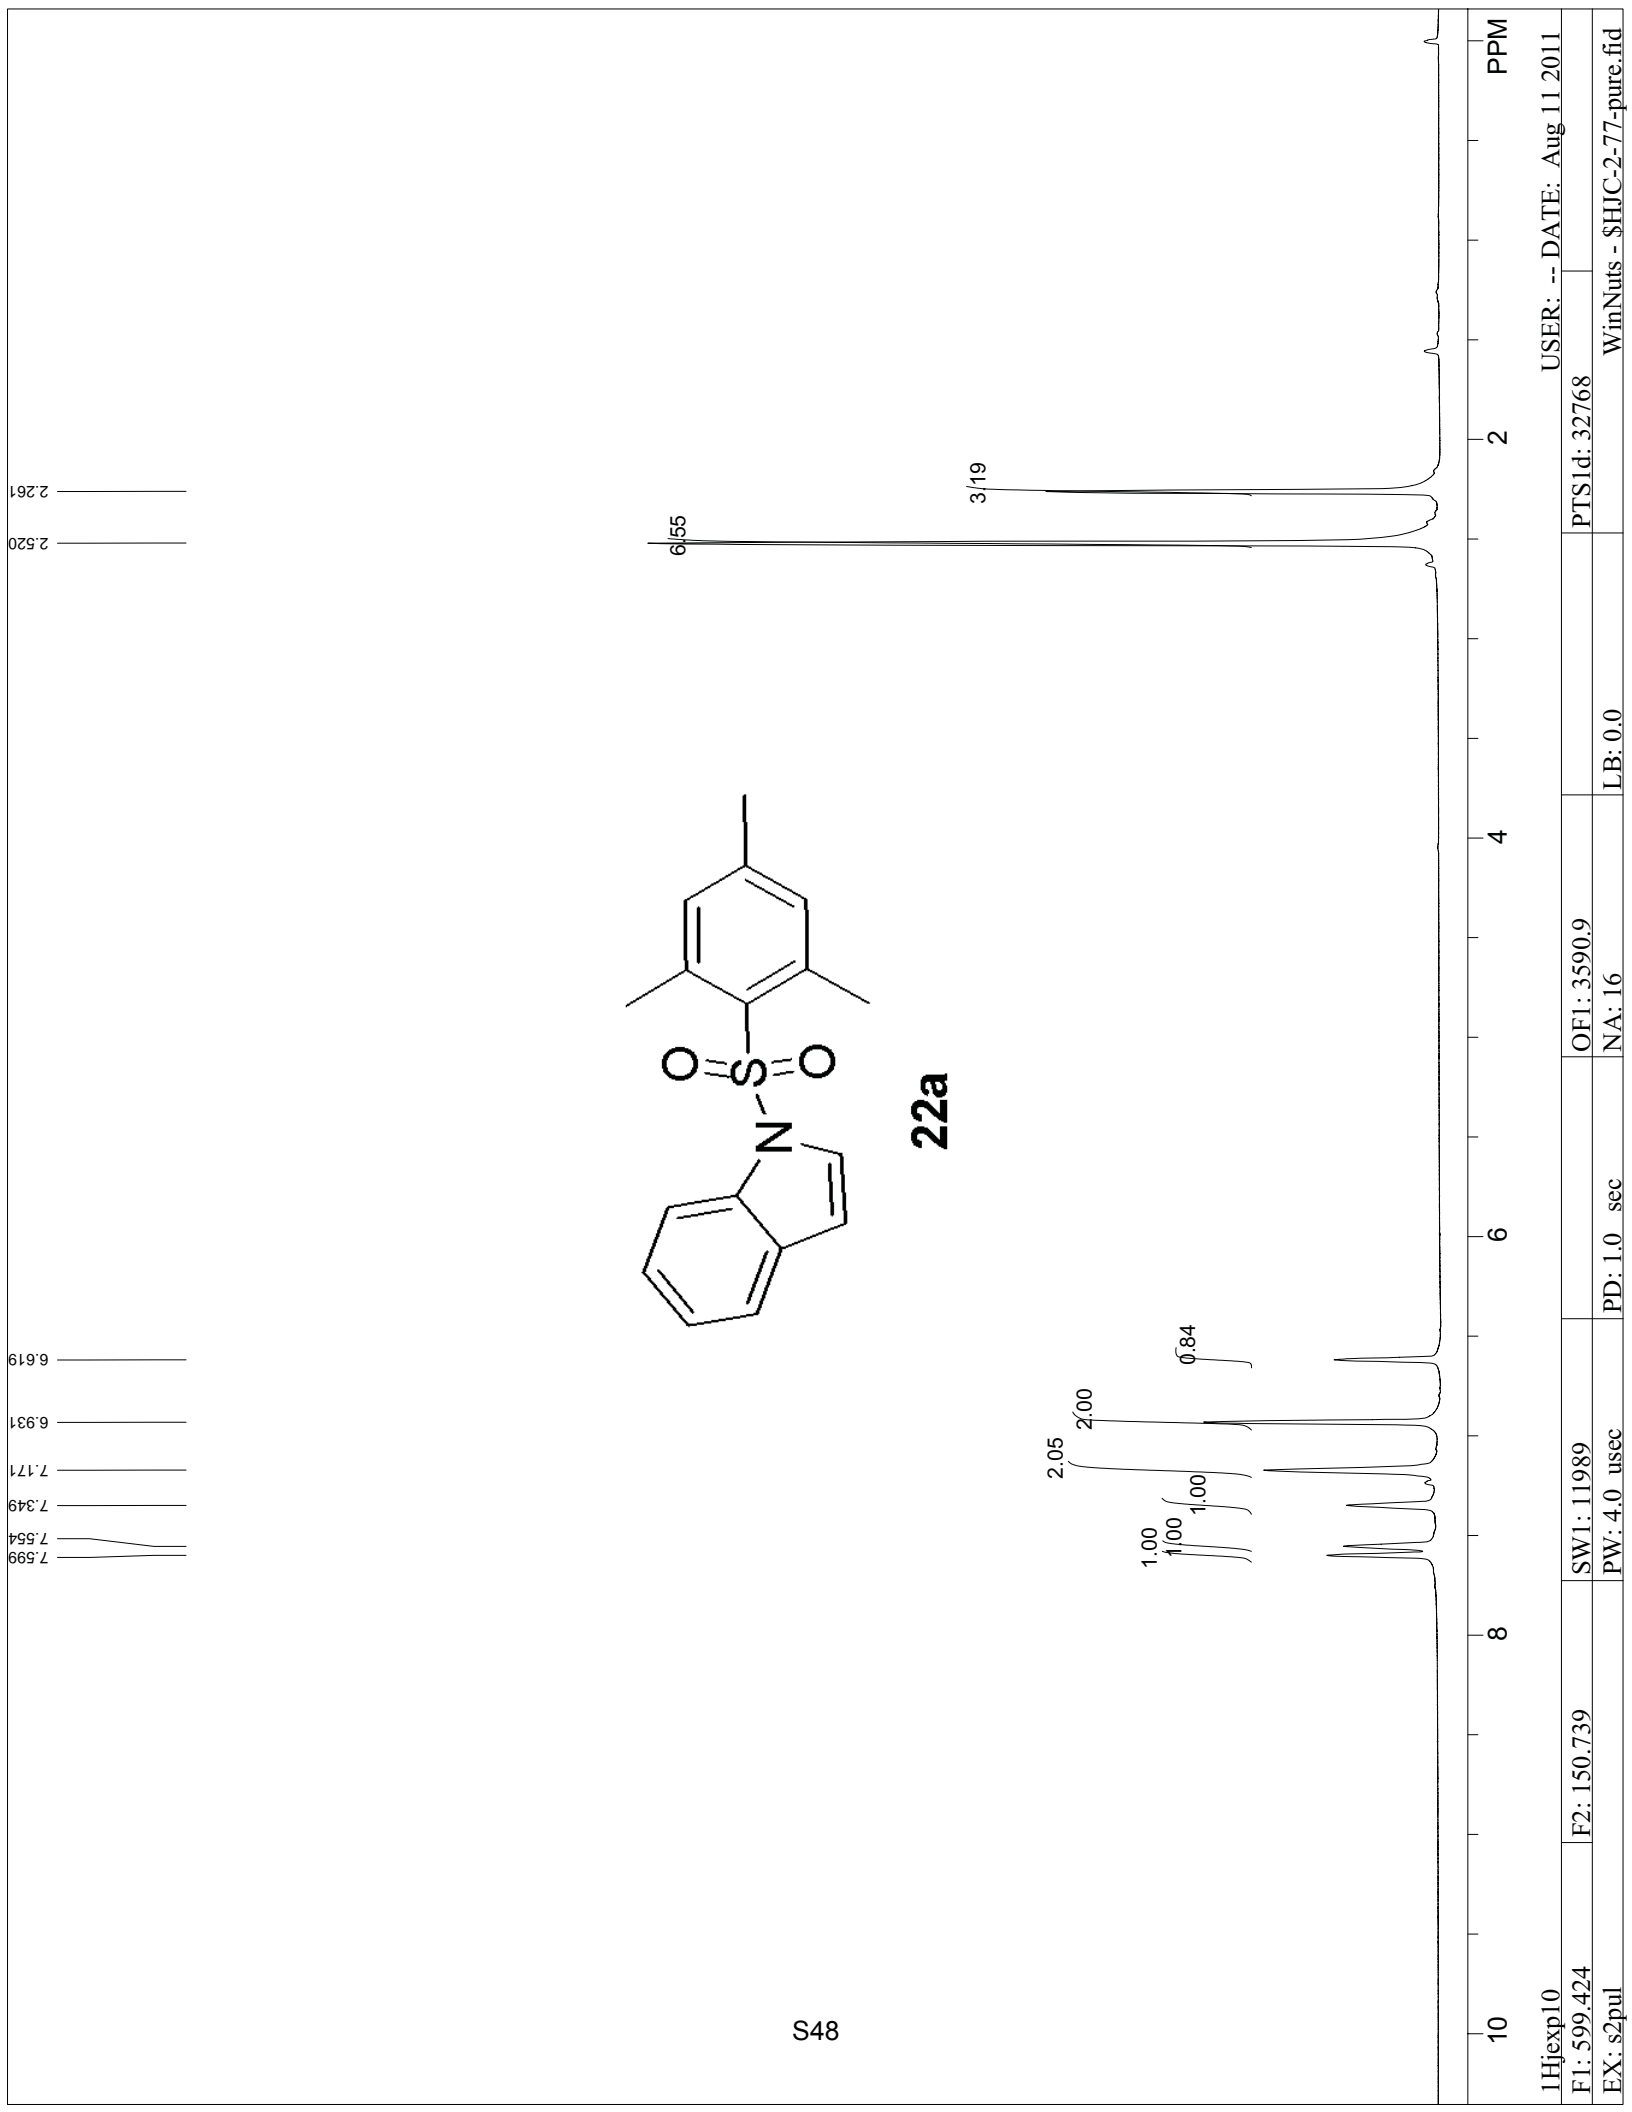



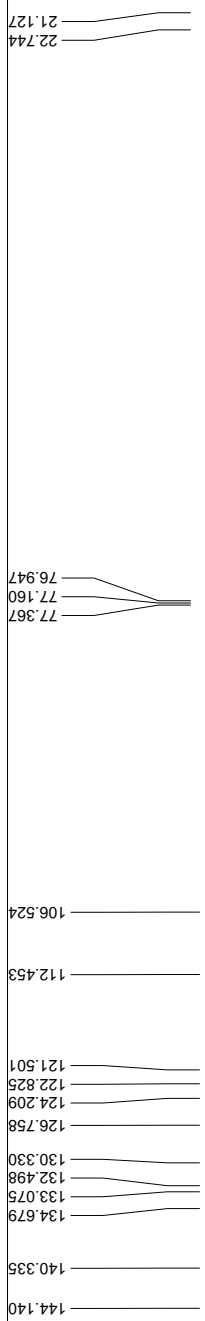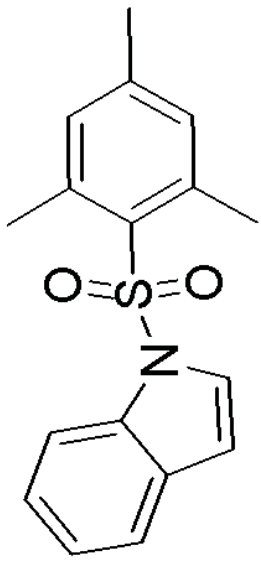

**22a**

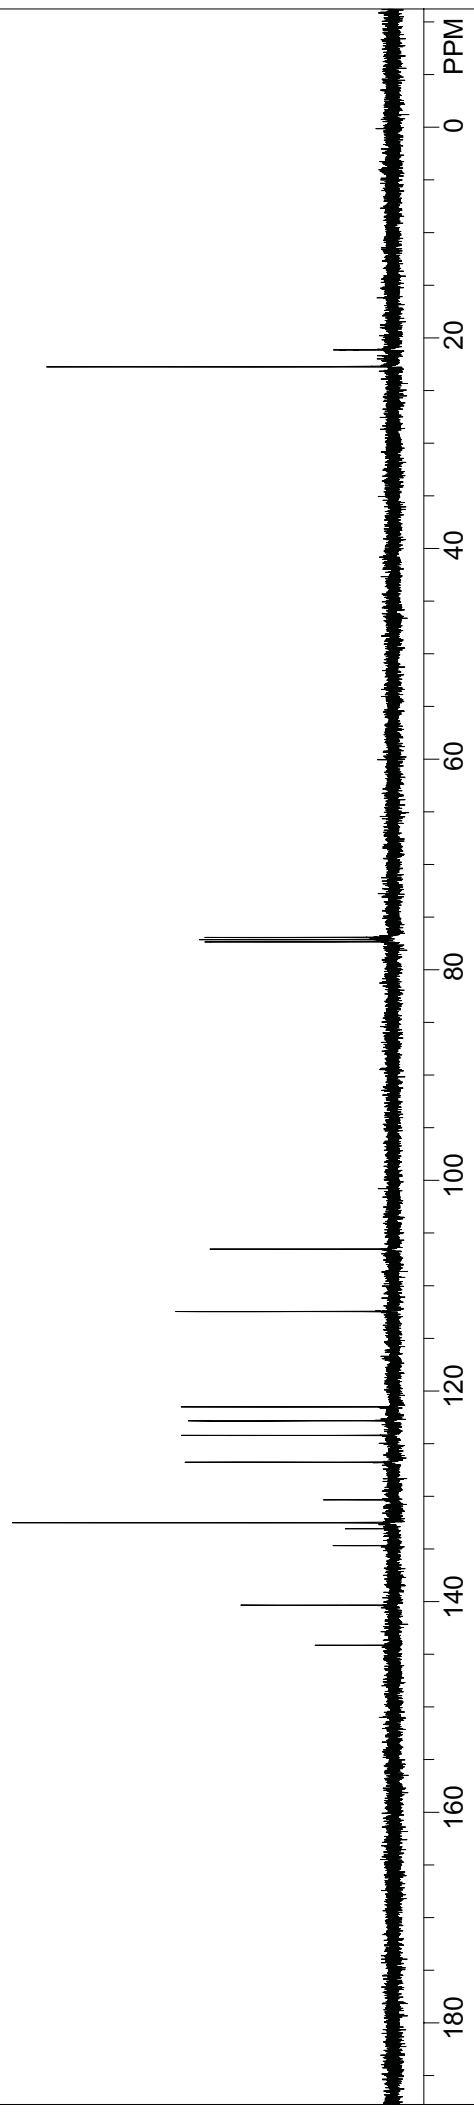

|             |                                  |
|-------------|----------------------------------|
| Std carbon  | USER: -- DATE: Aug 11 2011       |
| F1: 150.738 | PTS1d: 32768                     |
| F2: 599.423 | OF1: 13303.8                     |
| EX: s2pul   | NA: 512                          |
|             | LB: 0.0                          |
|             | PD: 1.0 sec                      |
|             | PW: 8.0 usec                     |
|             | SW1: 29996                       |
|             | WinNuts - \$HIC-2-77C-pure-2.fid |

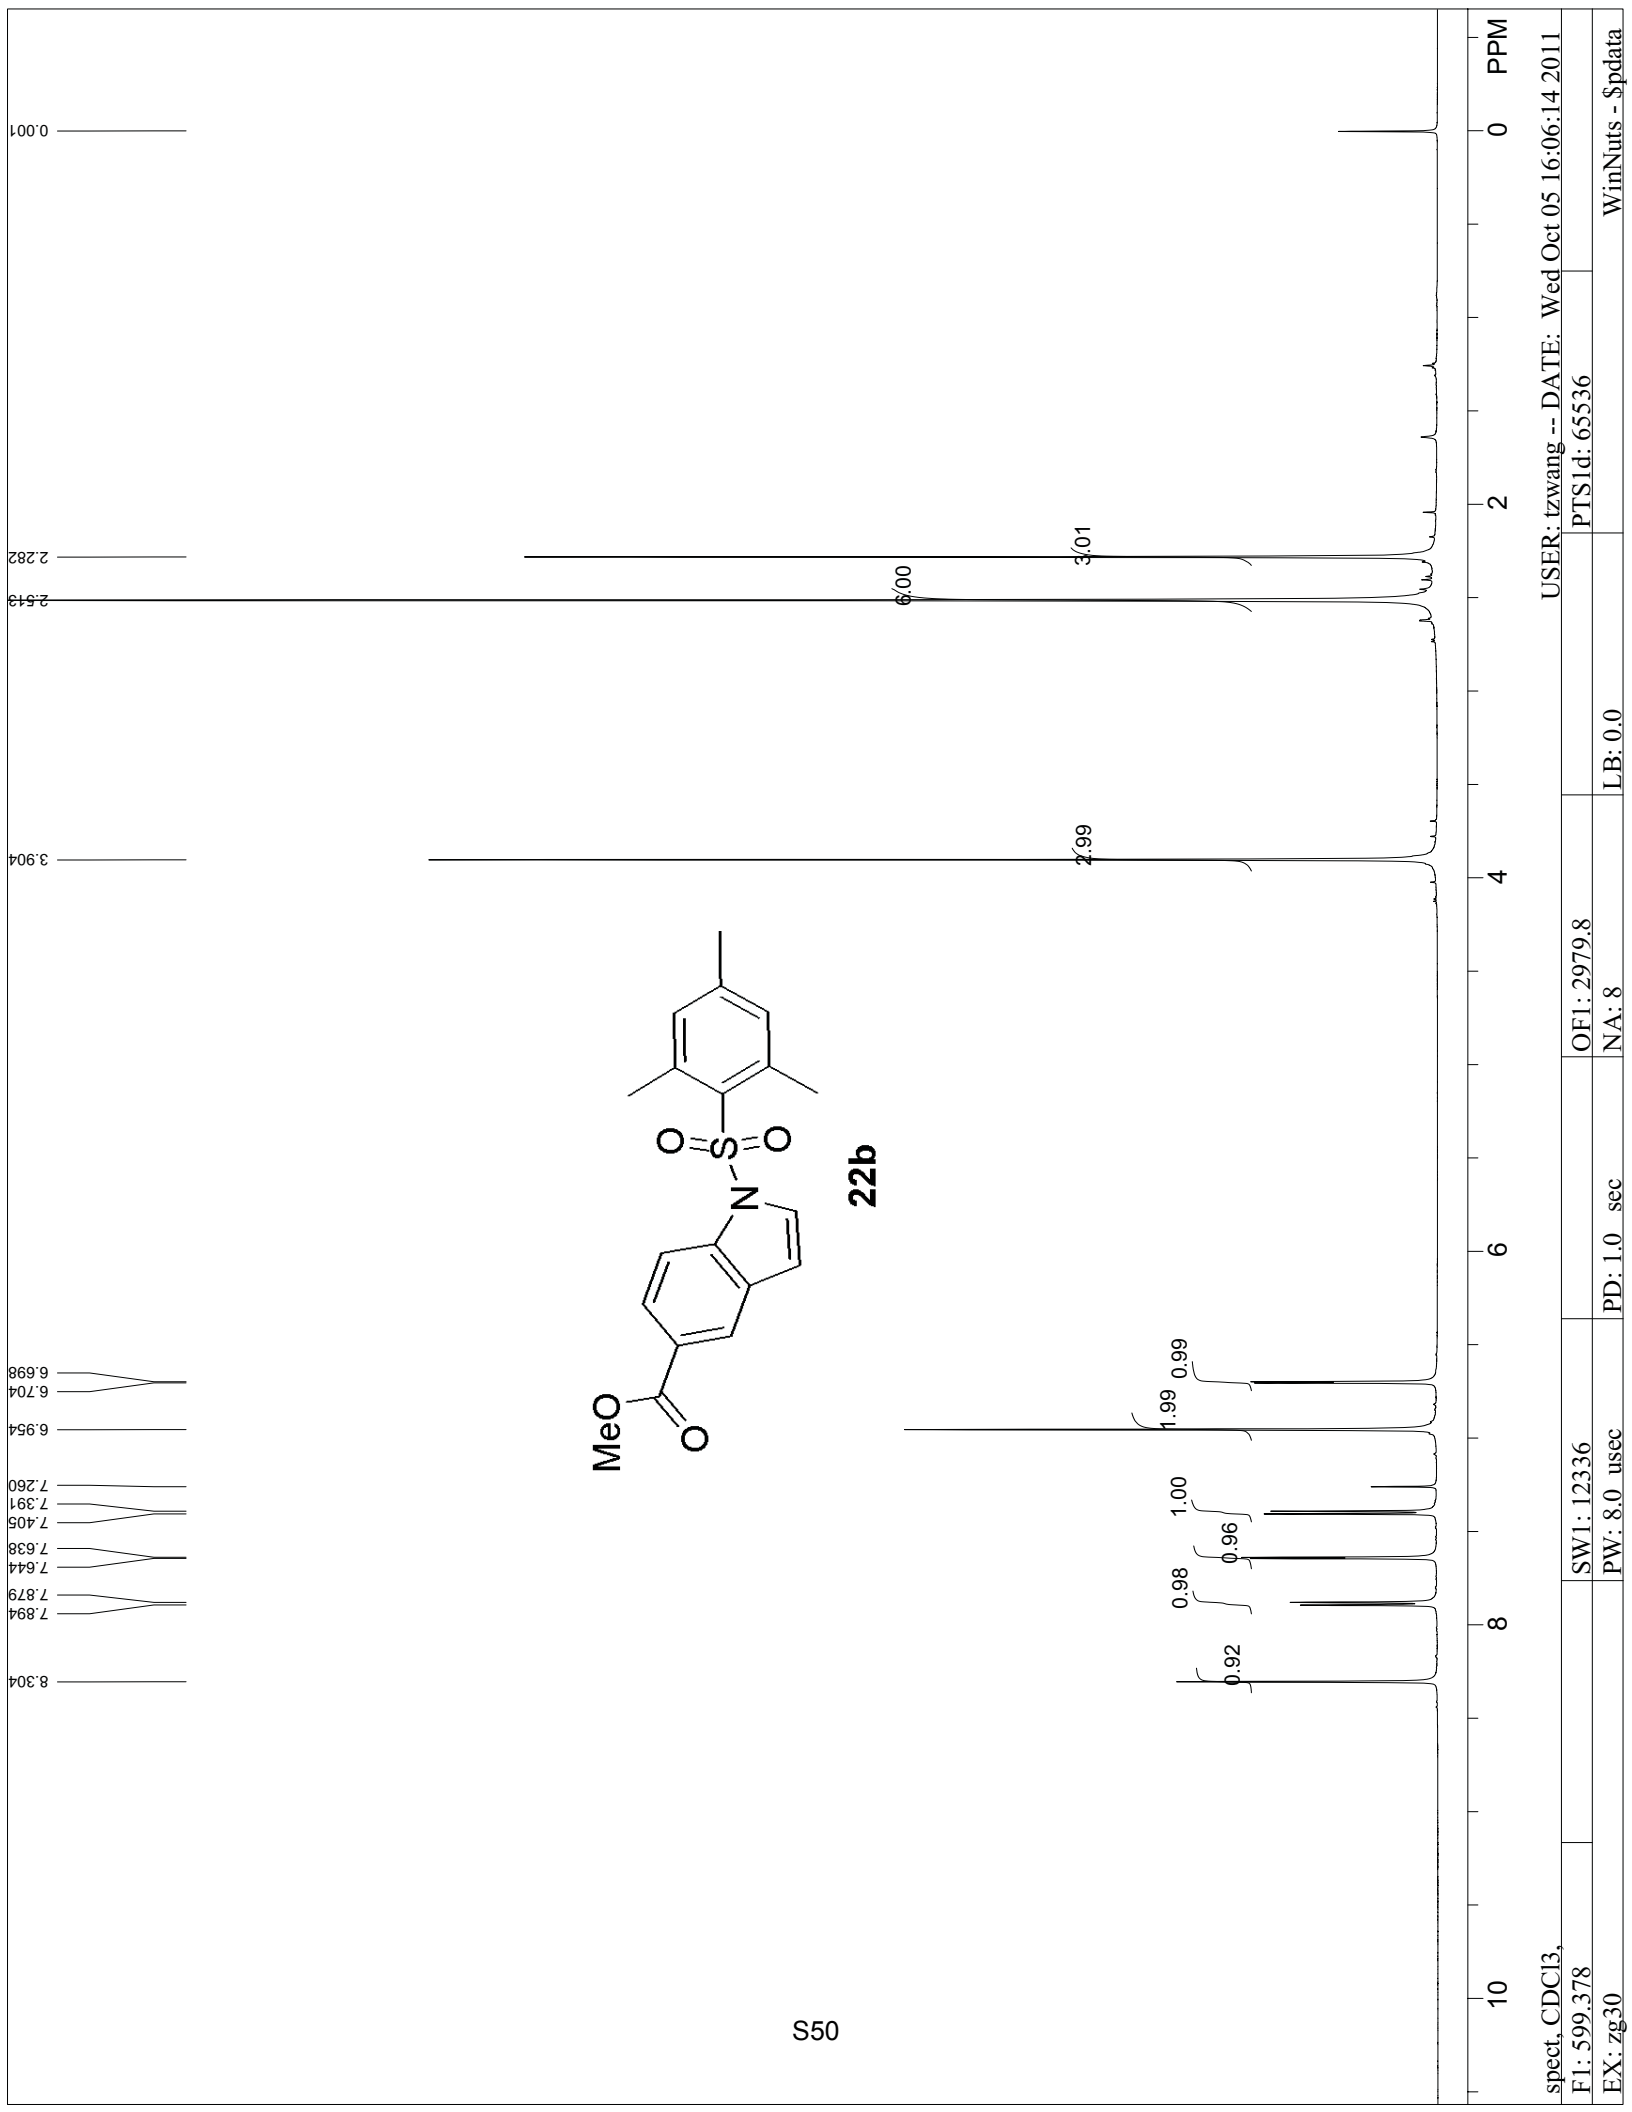

S50

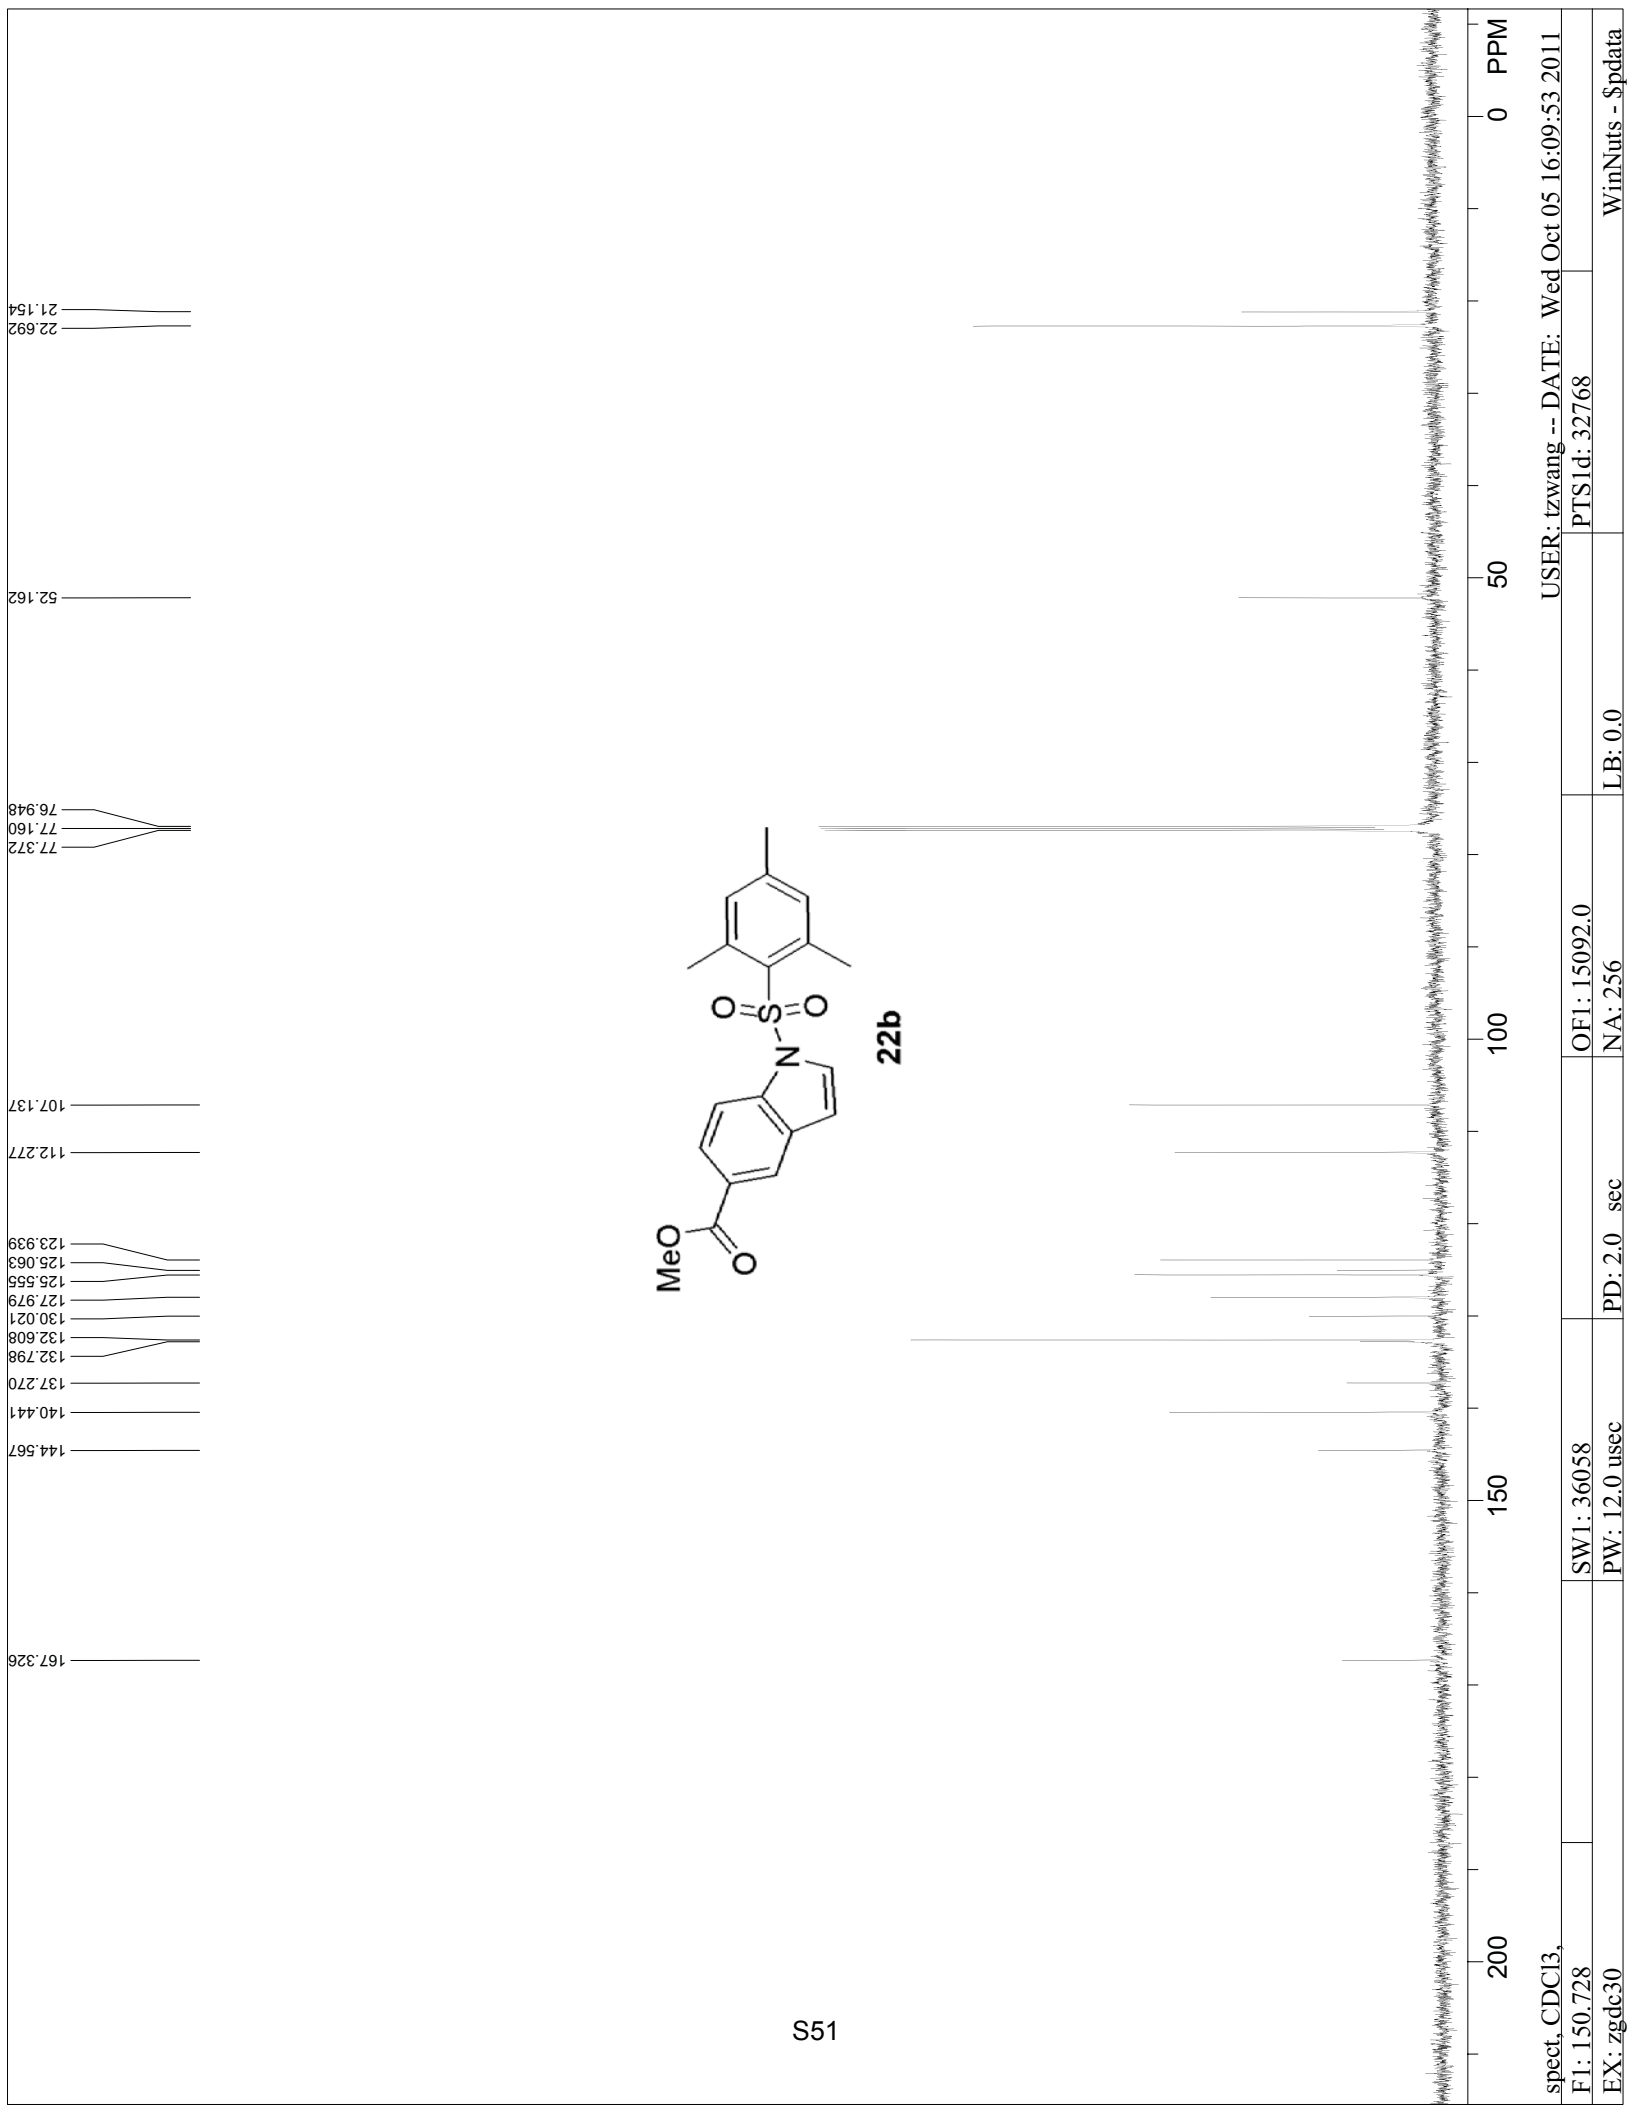

spect, CDCI3, USER: tzwang -- DATE: Wed Oct 05 16:09:53 2011  
 F1: 150.728 PTS1d: 32768  
 EX: zgdc30 LB: 0.0 OF1: 15092.0 NA: 256  
 PD: 2.0 sec SW1: 36058 PW: 12.0 usec  
 WinNuts - \$pdata

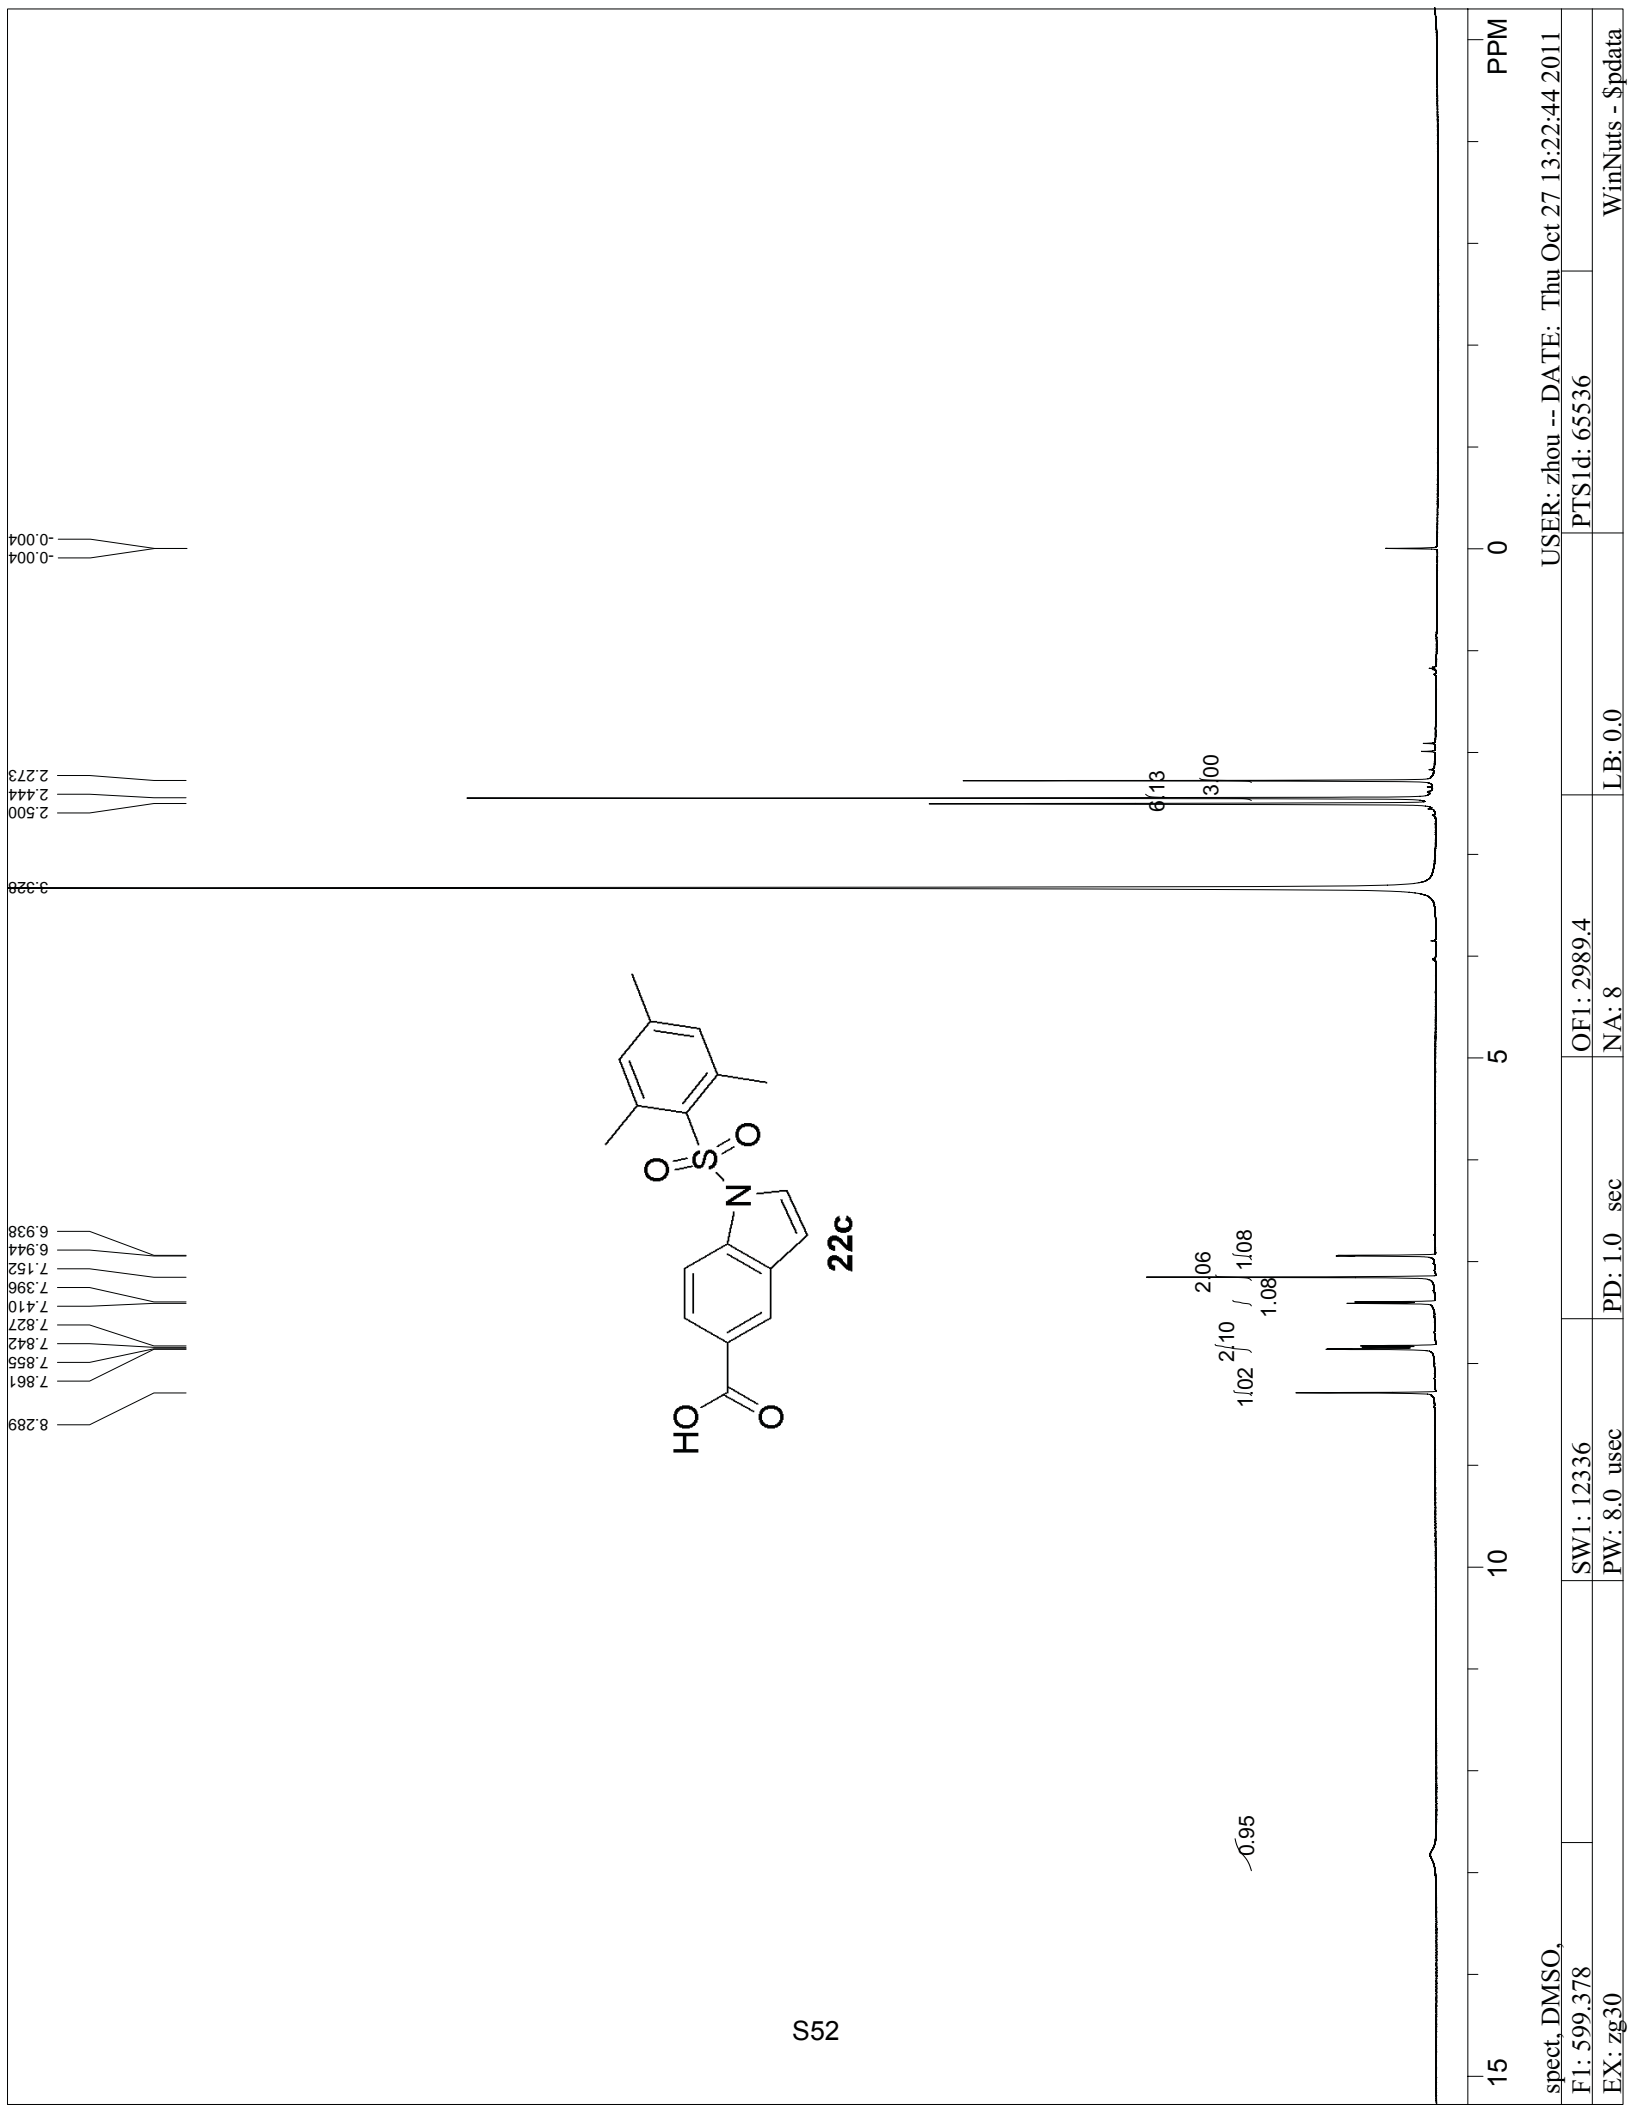

S52

spect, DMSO, USER: zhou -- DATE: Thu Oct 27 13:22:44 2011  
 F1: 599.378 OF1: 2989.4 PTS1d: 65536  
 EX: zg30 PW: 8.0 usec PD: 1.0 sec NA: 8 LB: 0.0 WinNuts - \$pdata

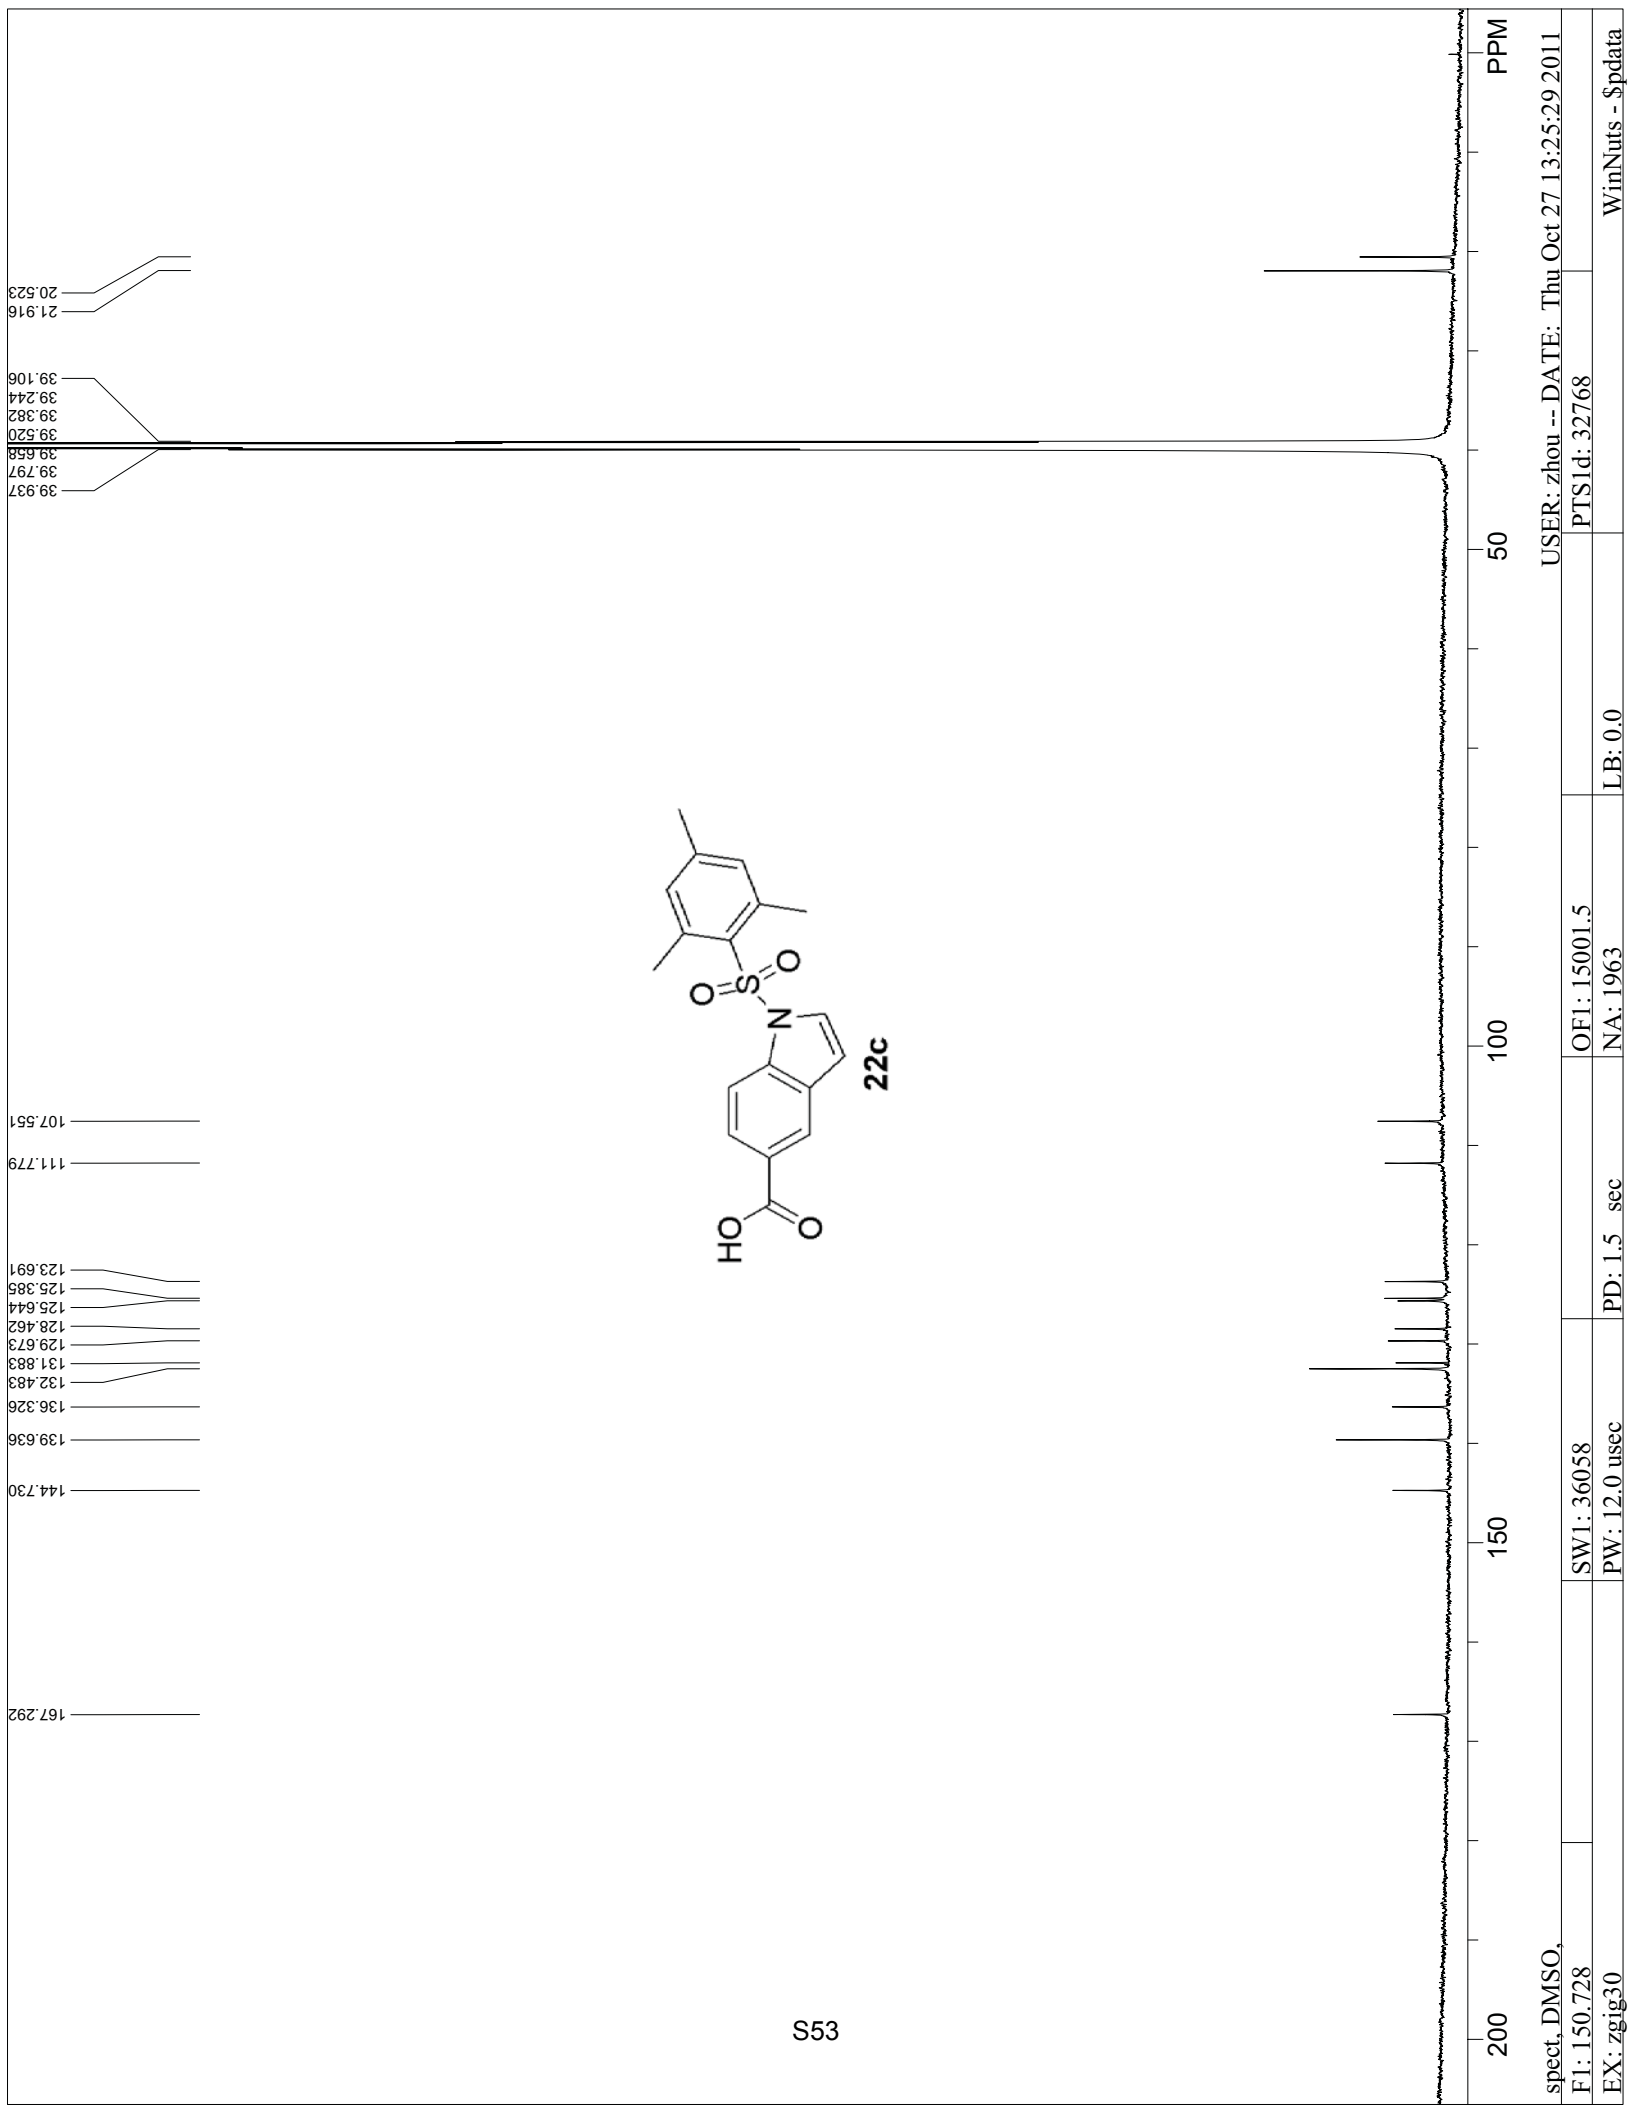

S53

|               |                                              |
|---------------|----------------------------------------------|
| spect, DMSO,  | USER: zhou -- DATE: Thu Oct 27 13:25:29 2011 |
| F1: 150.728   | PTS1d: 32768                                 |
| EX: zgig30    | LB: 0.0                                      |
| SW1: 36058    | OF1: 15001.5                                 |
| PW: 12.0 usec | NA: 1963                                     |
| PD: 1.5 sec   |                                              |
|               | WinNuts - \$pdata                            |

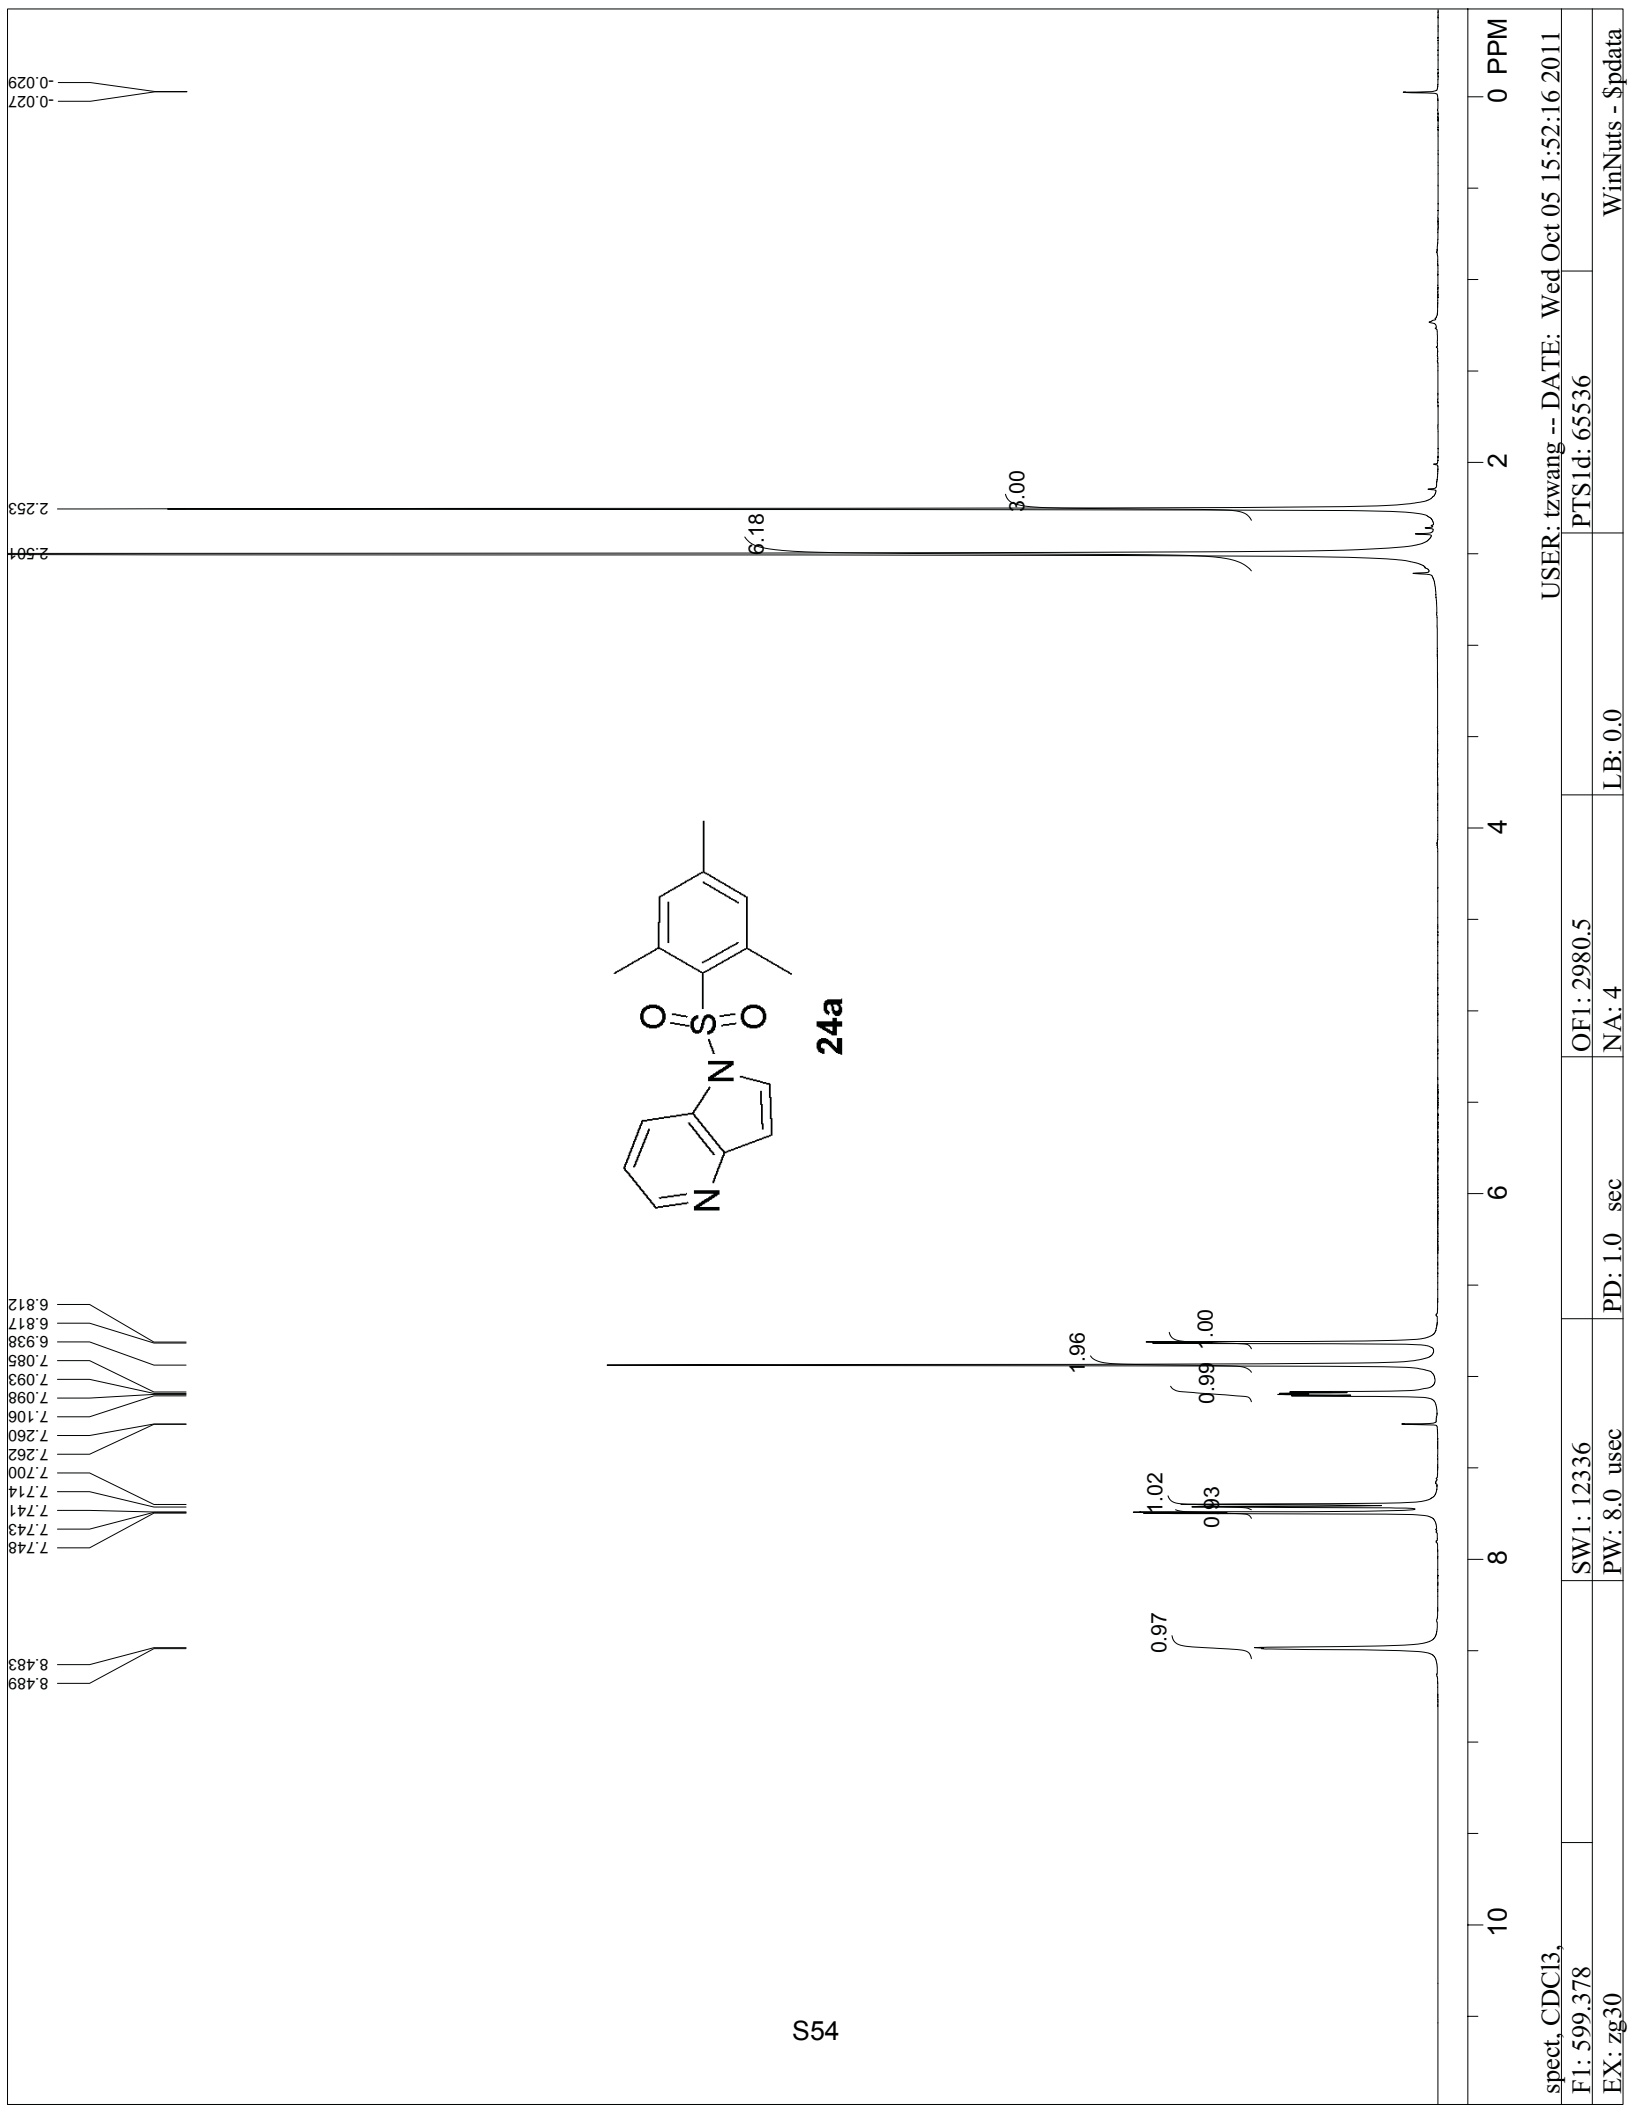

S54

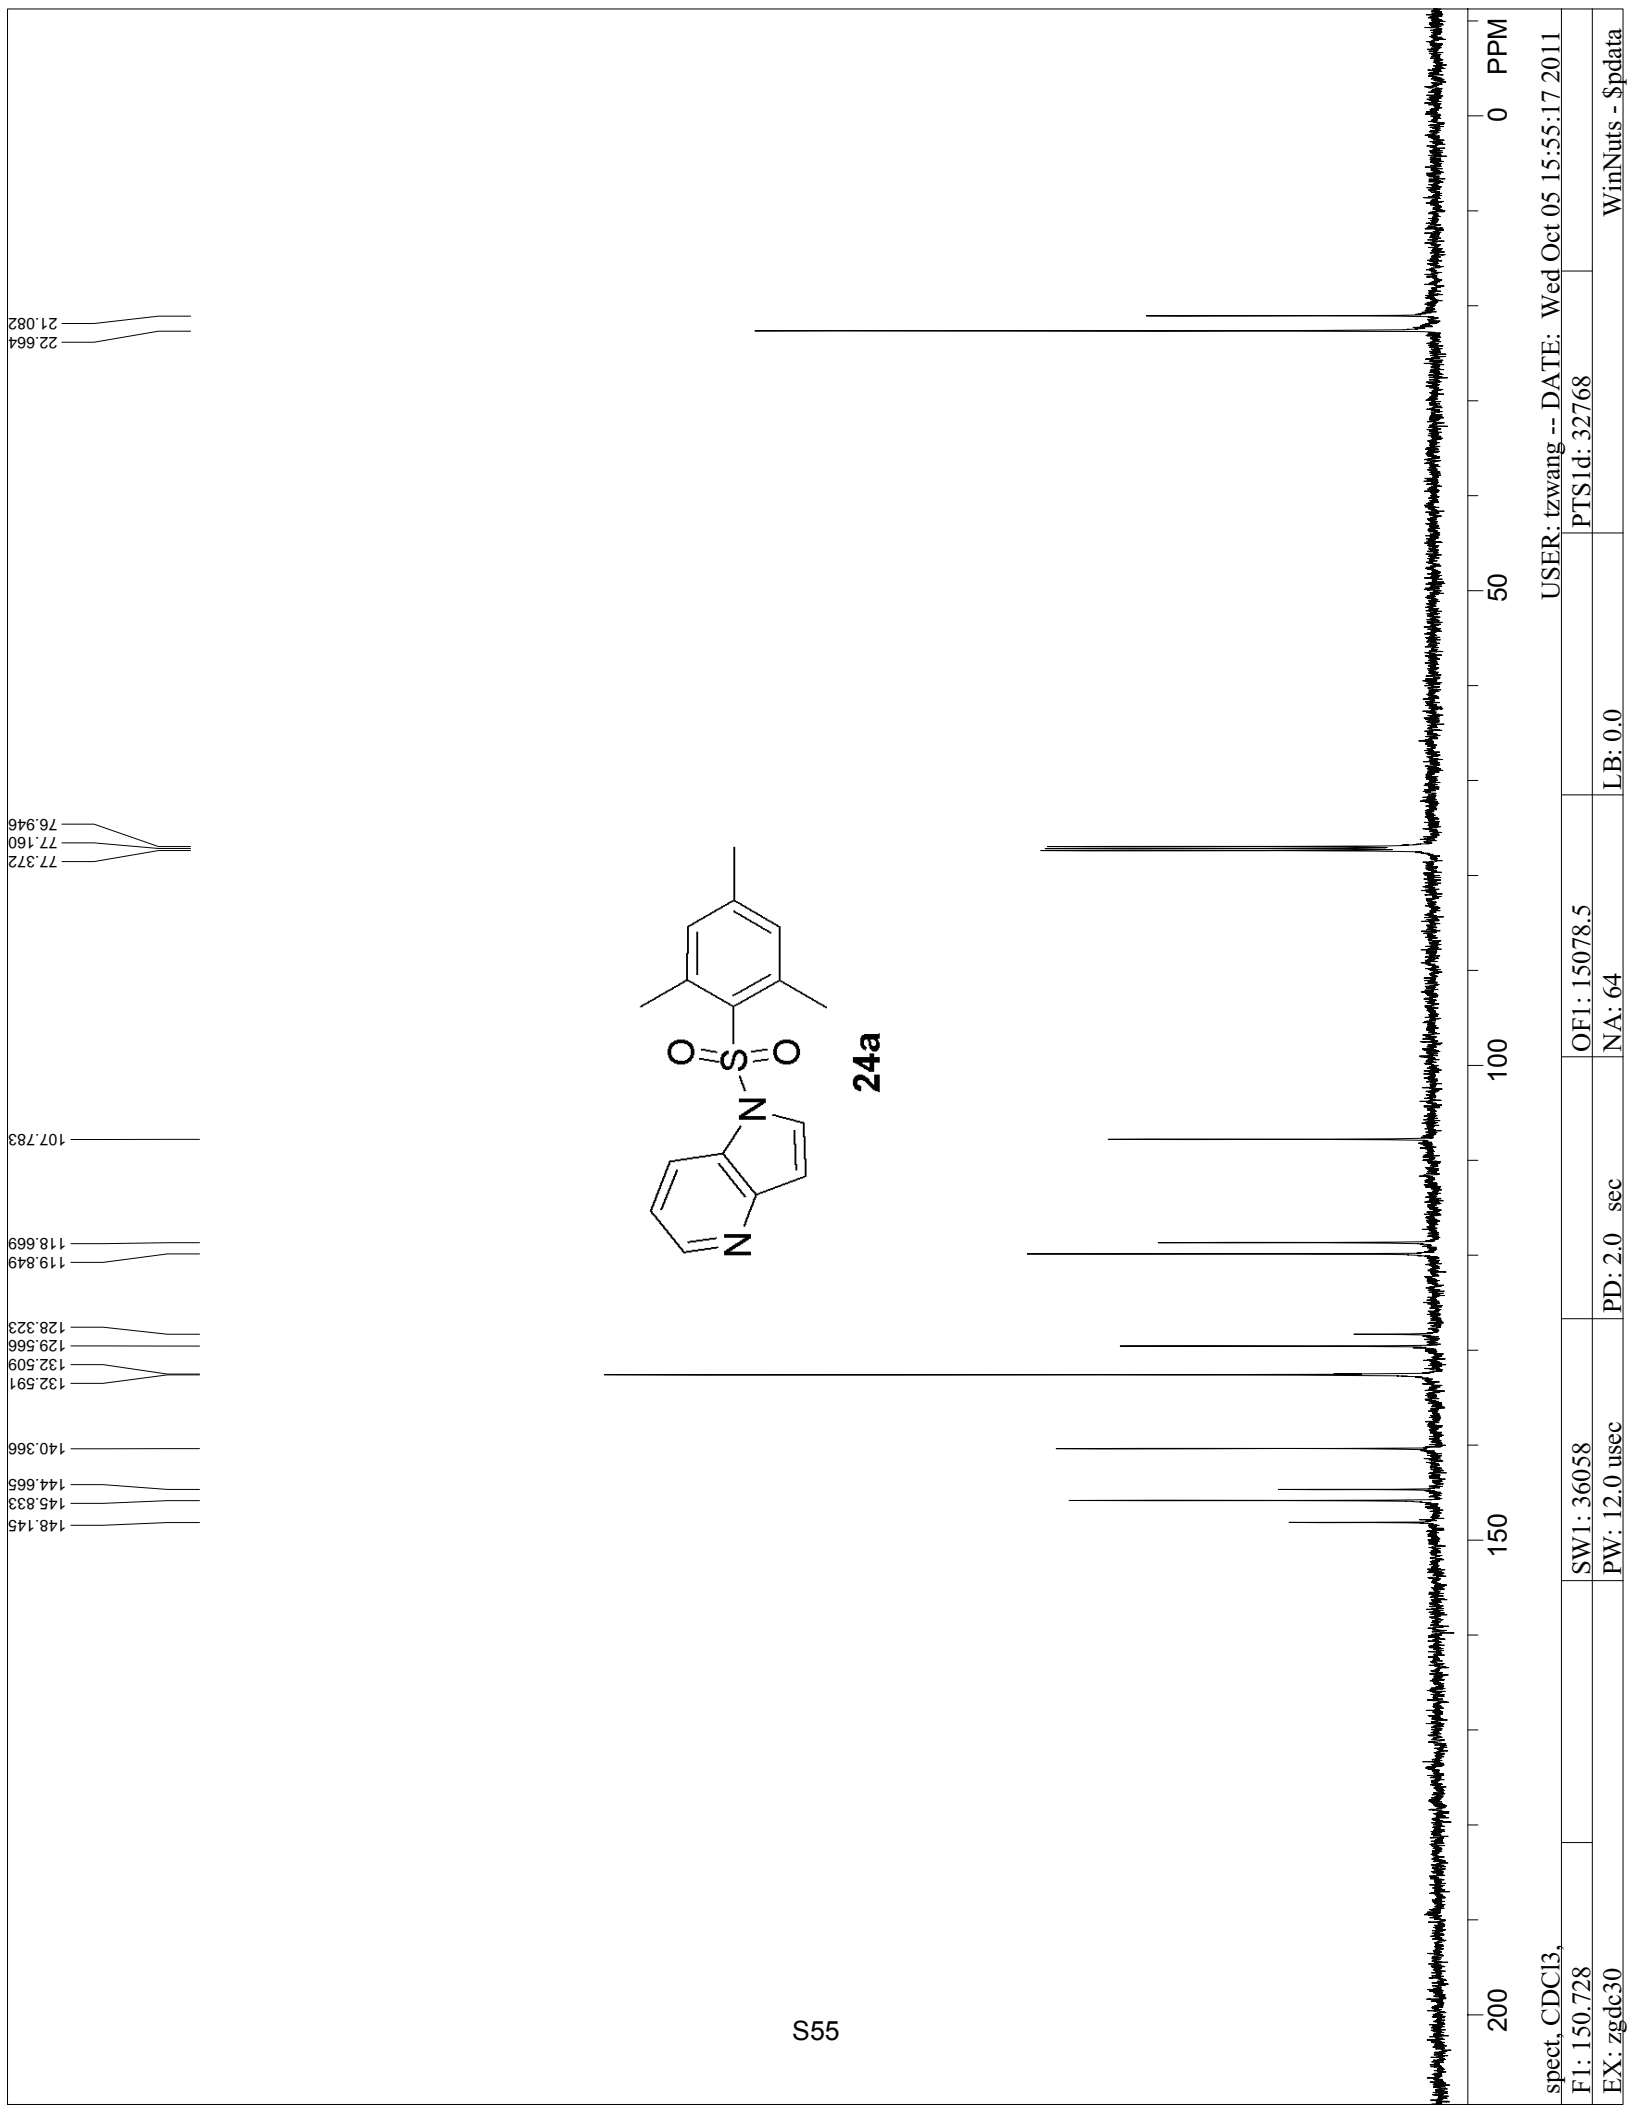

spect, CDCl3, USER: tzwang -- DATE: Wed Oct 05 15:55:17 2011  
 F1: 150.728 OF1: 15078.5 PTS1d: 32768  
 EX: zgdc30 PD: 2.0 sec NA: 64 LB: 0.0 WinNuts - \$pdata

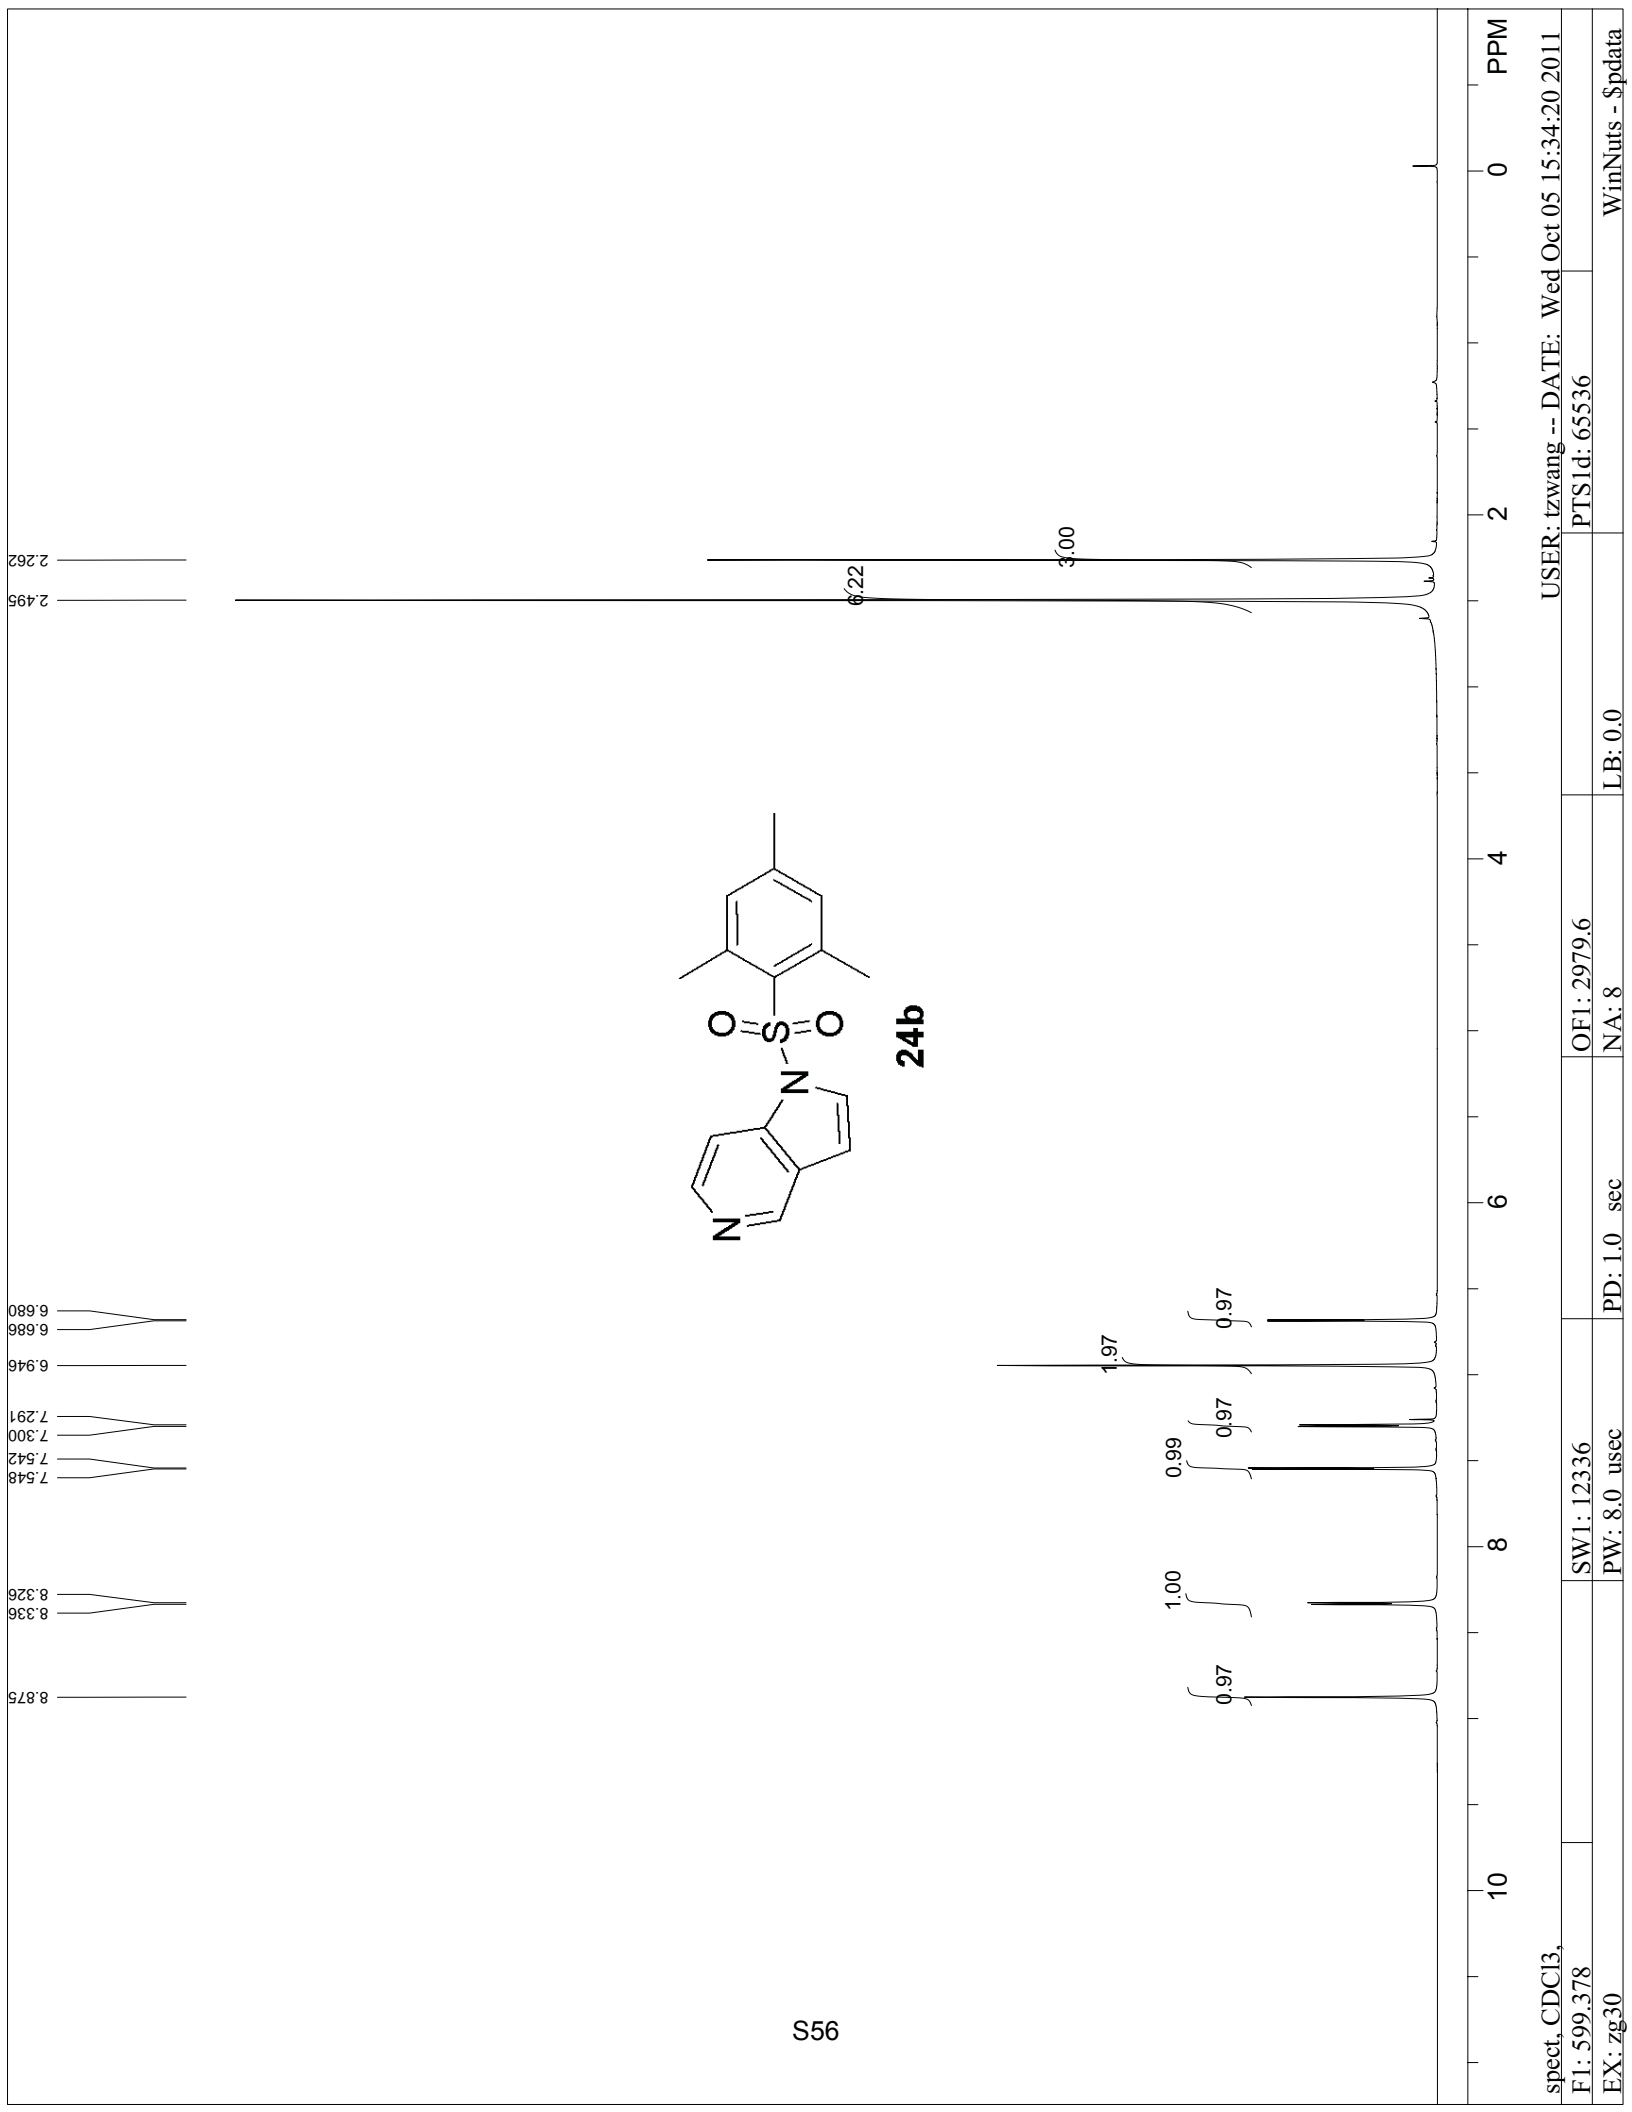



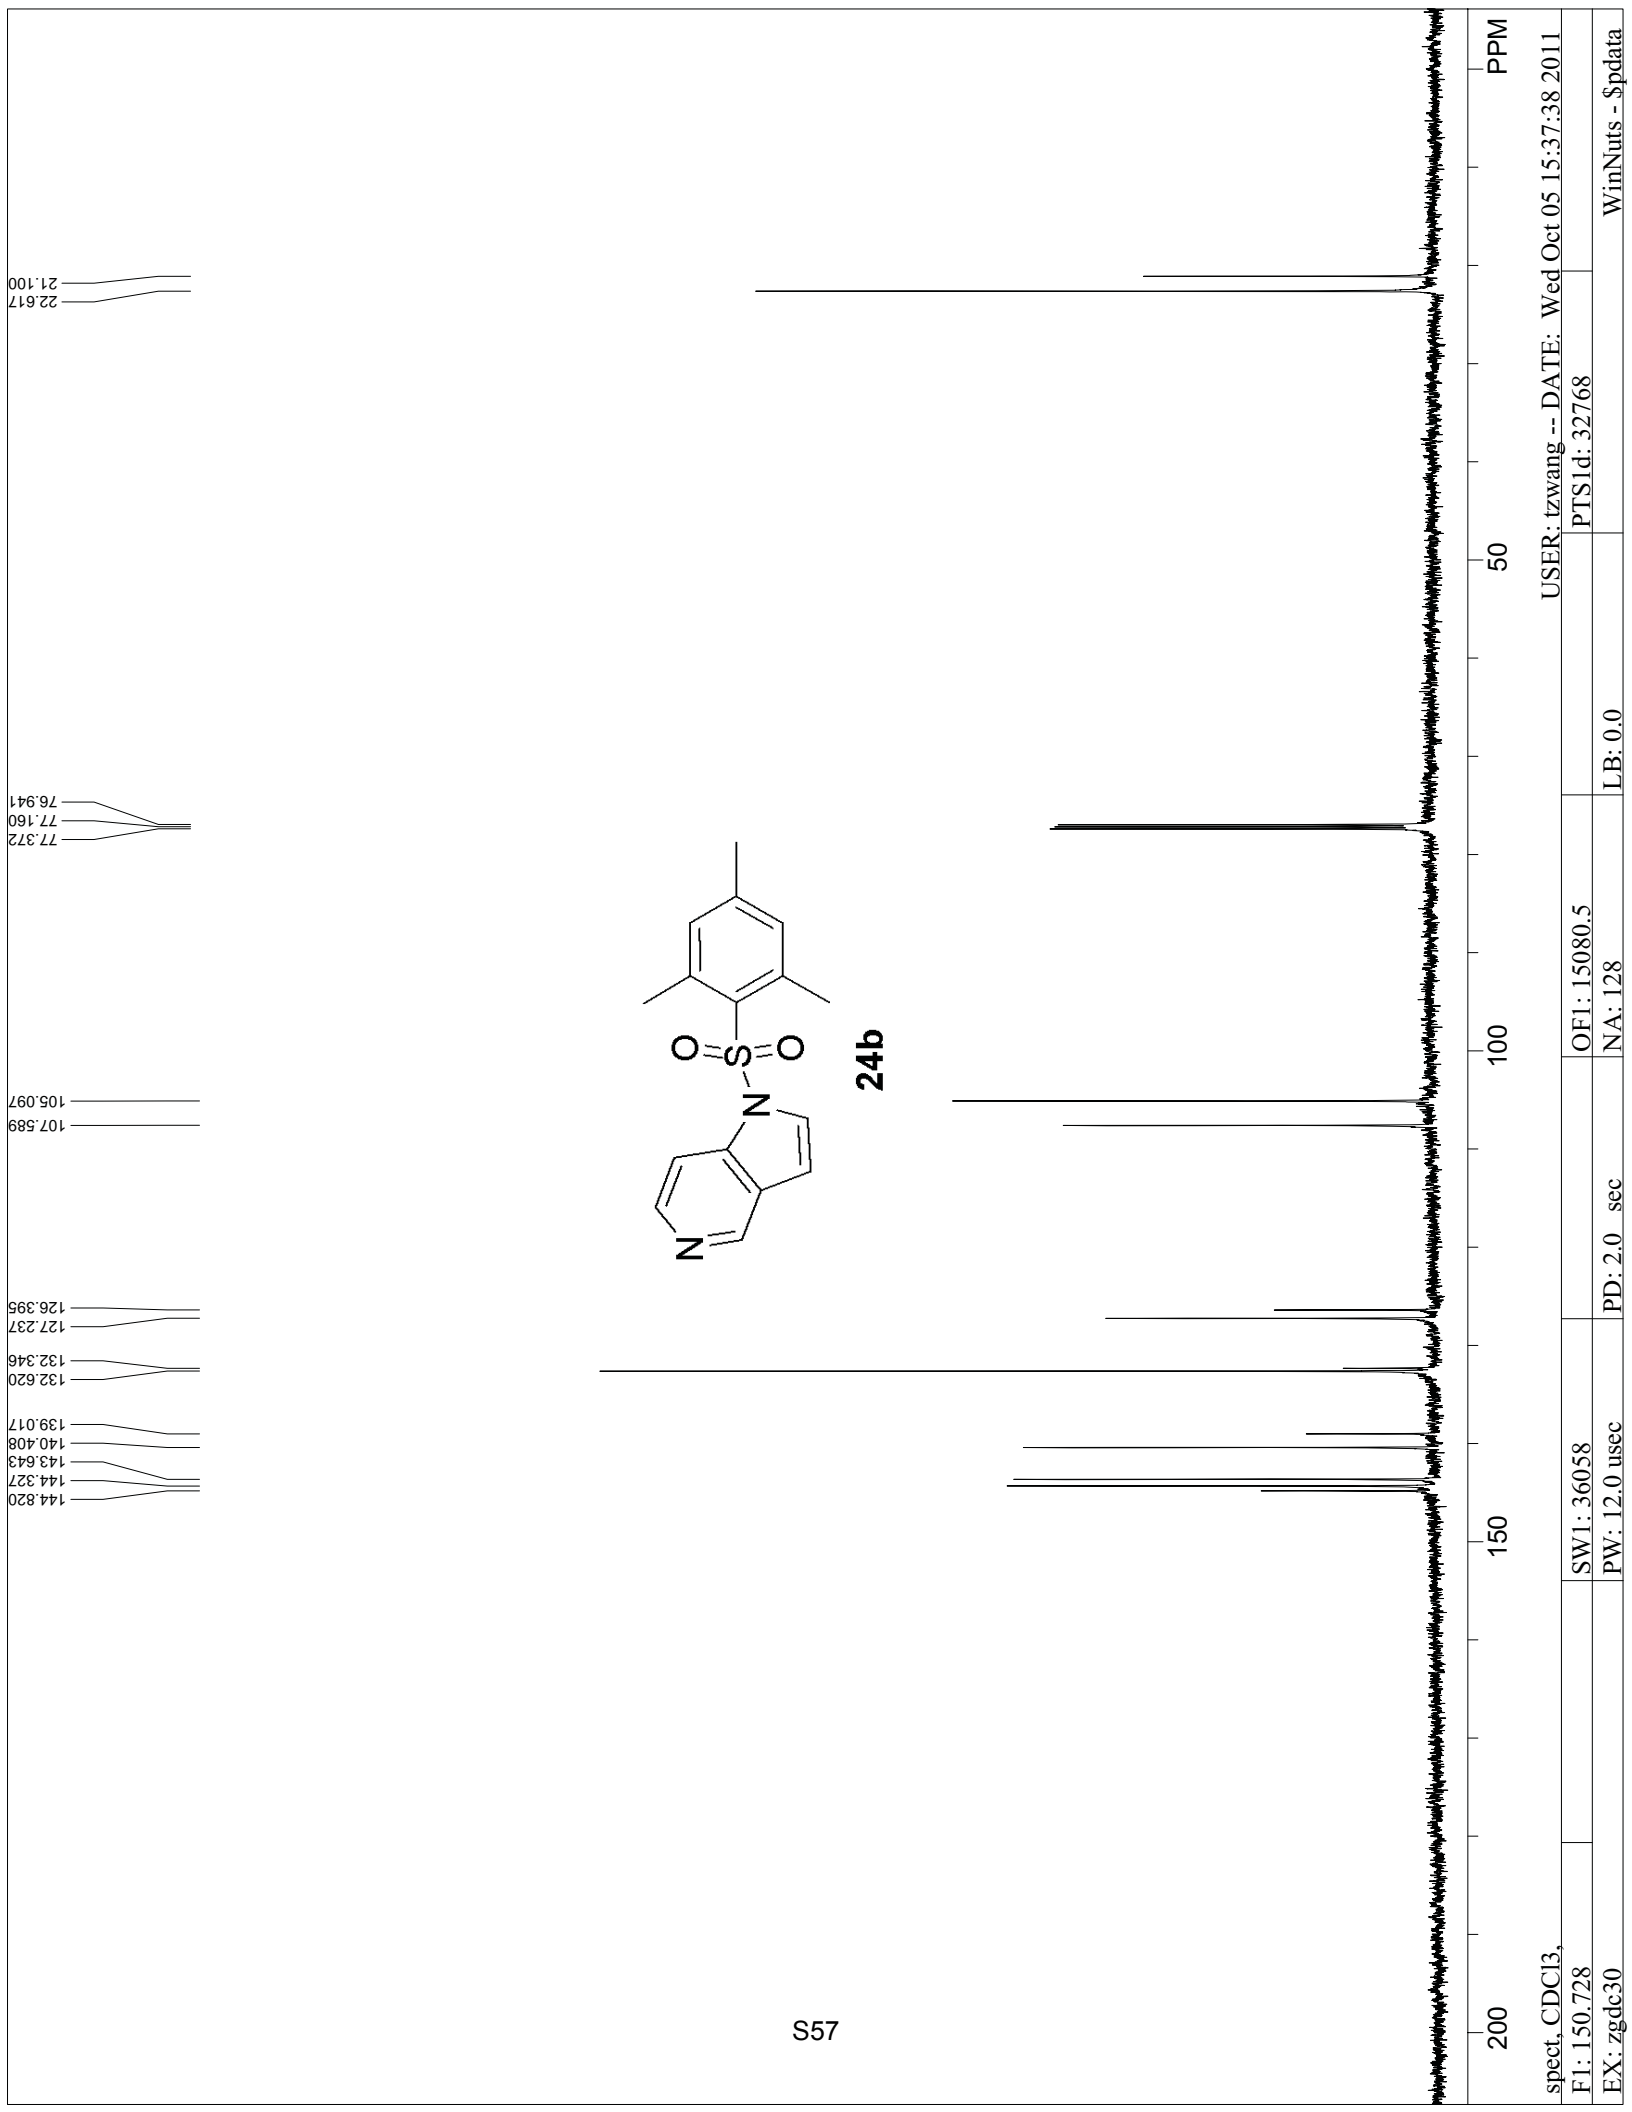

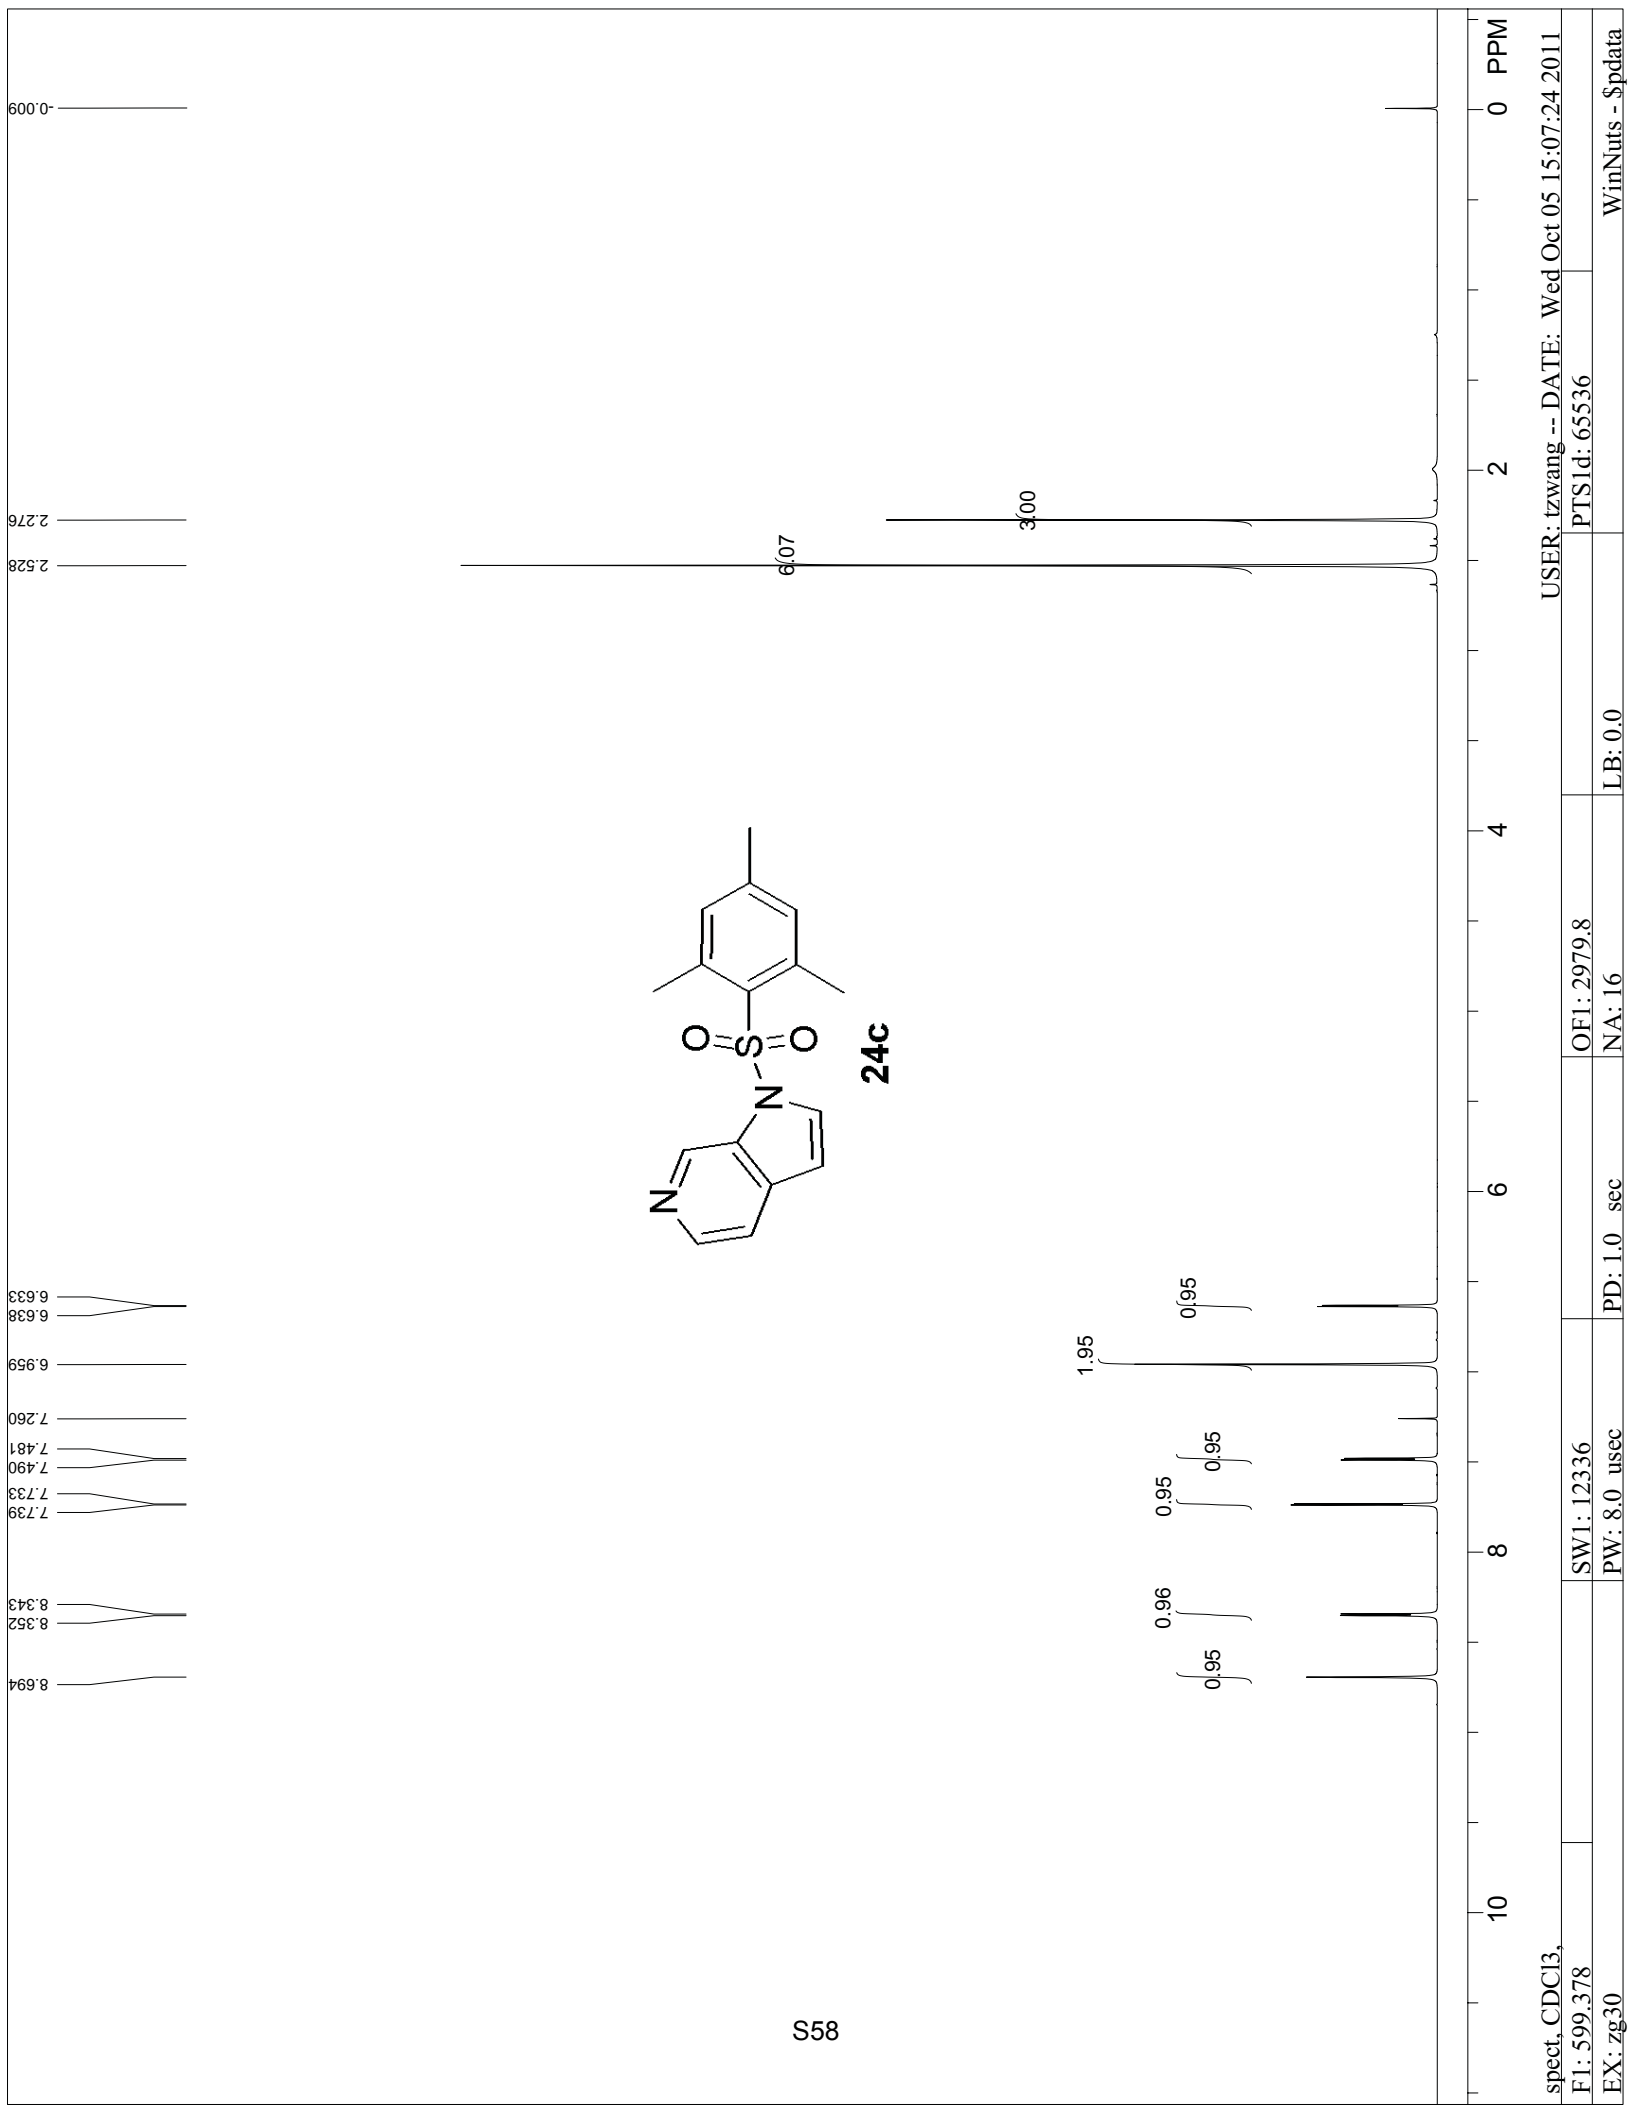

S58

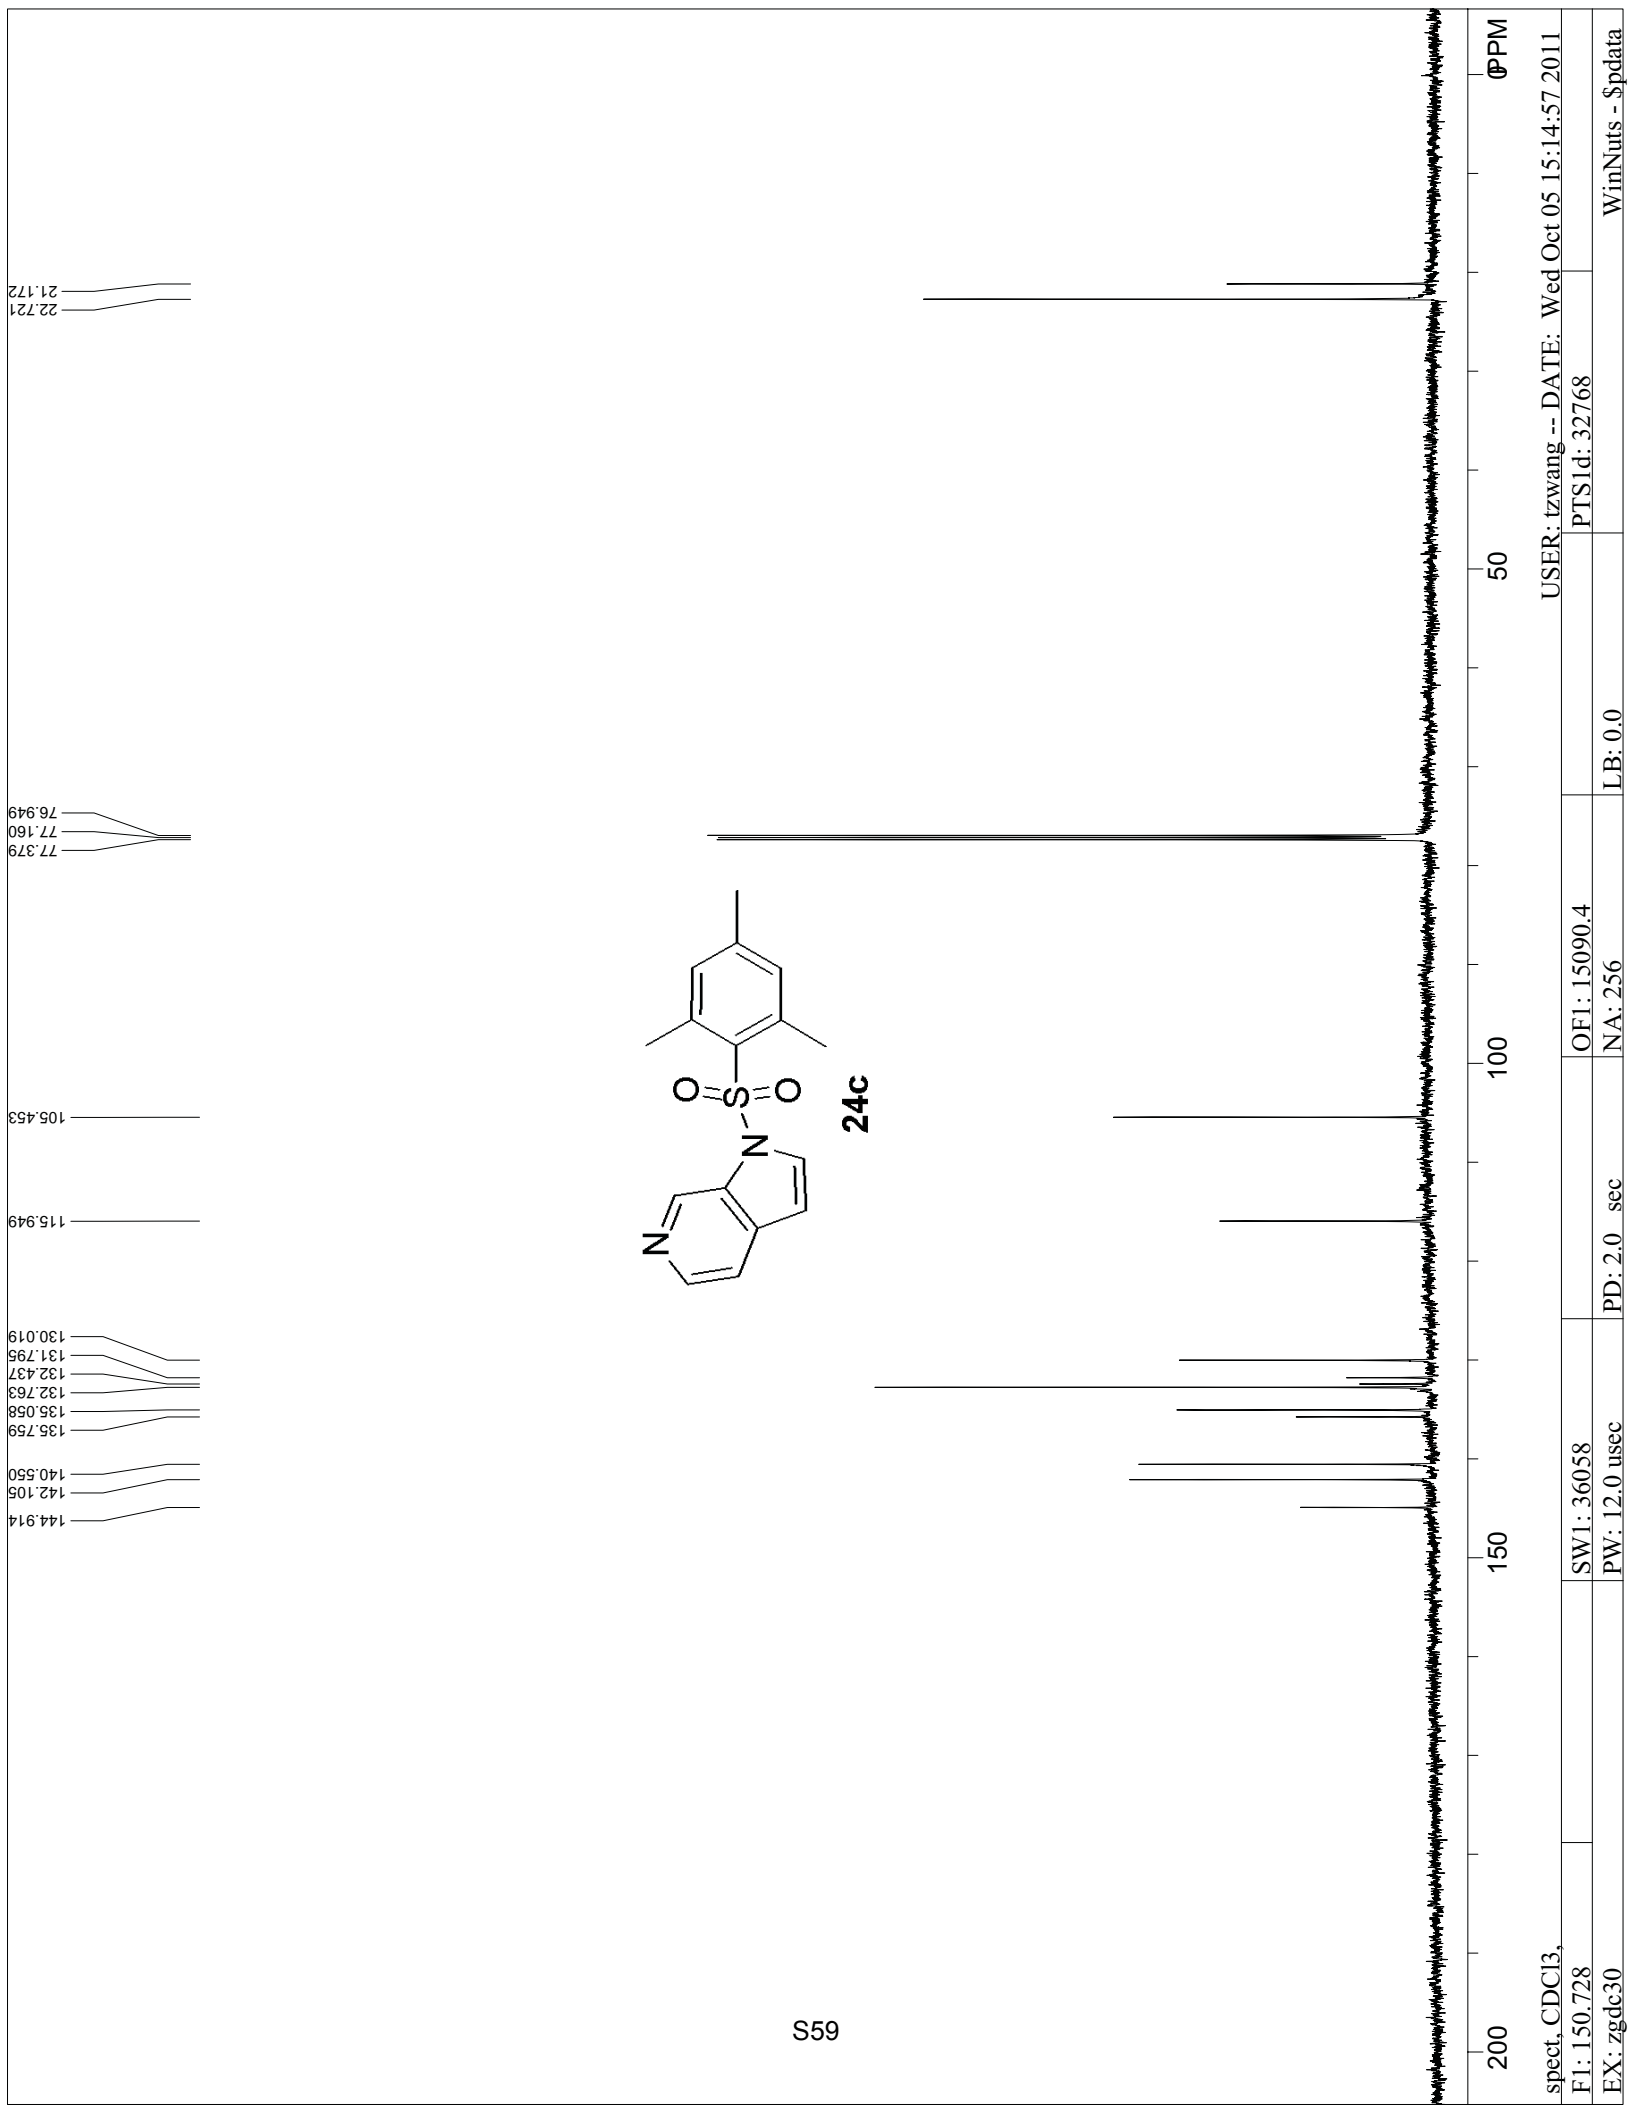

S59

|               |               |              |              |                                                |
|---------------|---------------|--------------|--------------|------------------------------------------------|
| 200           | 150           | 100          | 50           | 0 PPM                                          |
| spect, CDCI3, |               |              |              | USER: tzwang -- DATE: Wed Oct 05 15:14:57 2011 |
| F1: 150.728   | SW1: 36058    | OF1: 15090.4 | PTS1d: 32768 |                                                |
| EX: zgdc30    | PW: 12.0 usec | PD: 2.0 sec  | NA: 256      | LB: 0.0                                        |
|               |               |              |              | WinNuts - \$pdata                              |

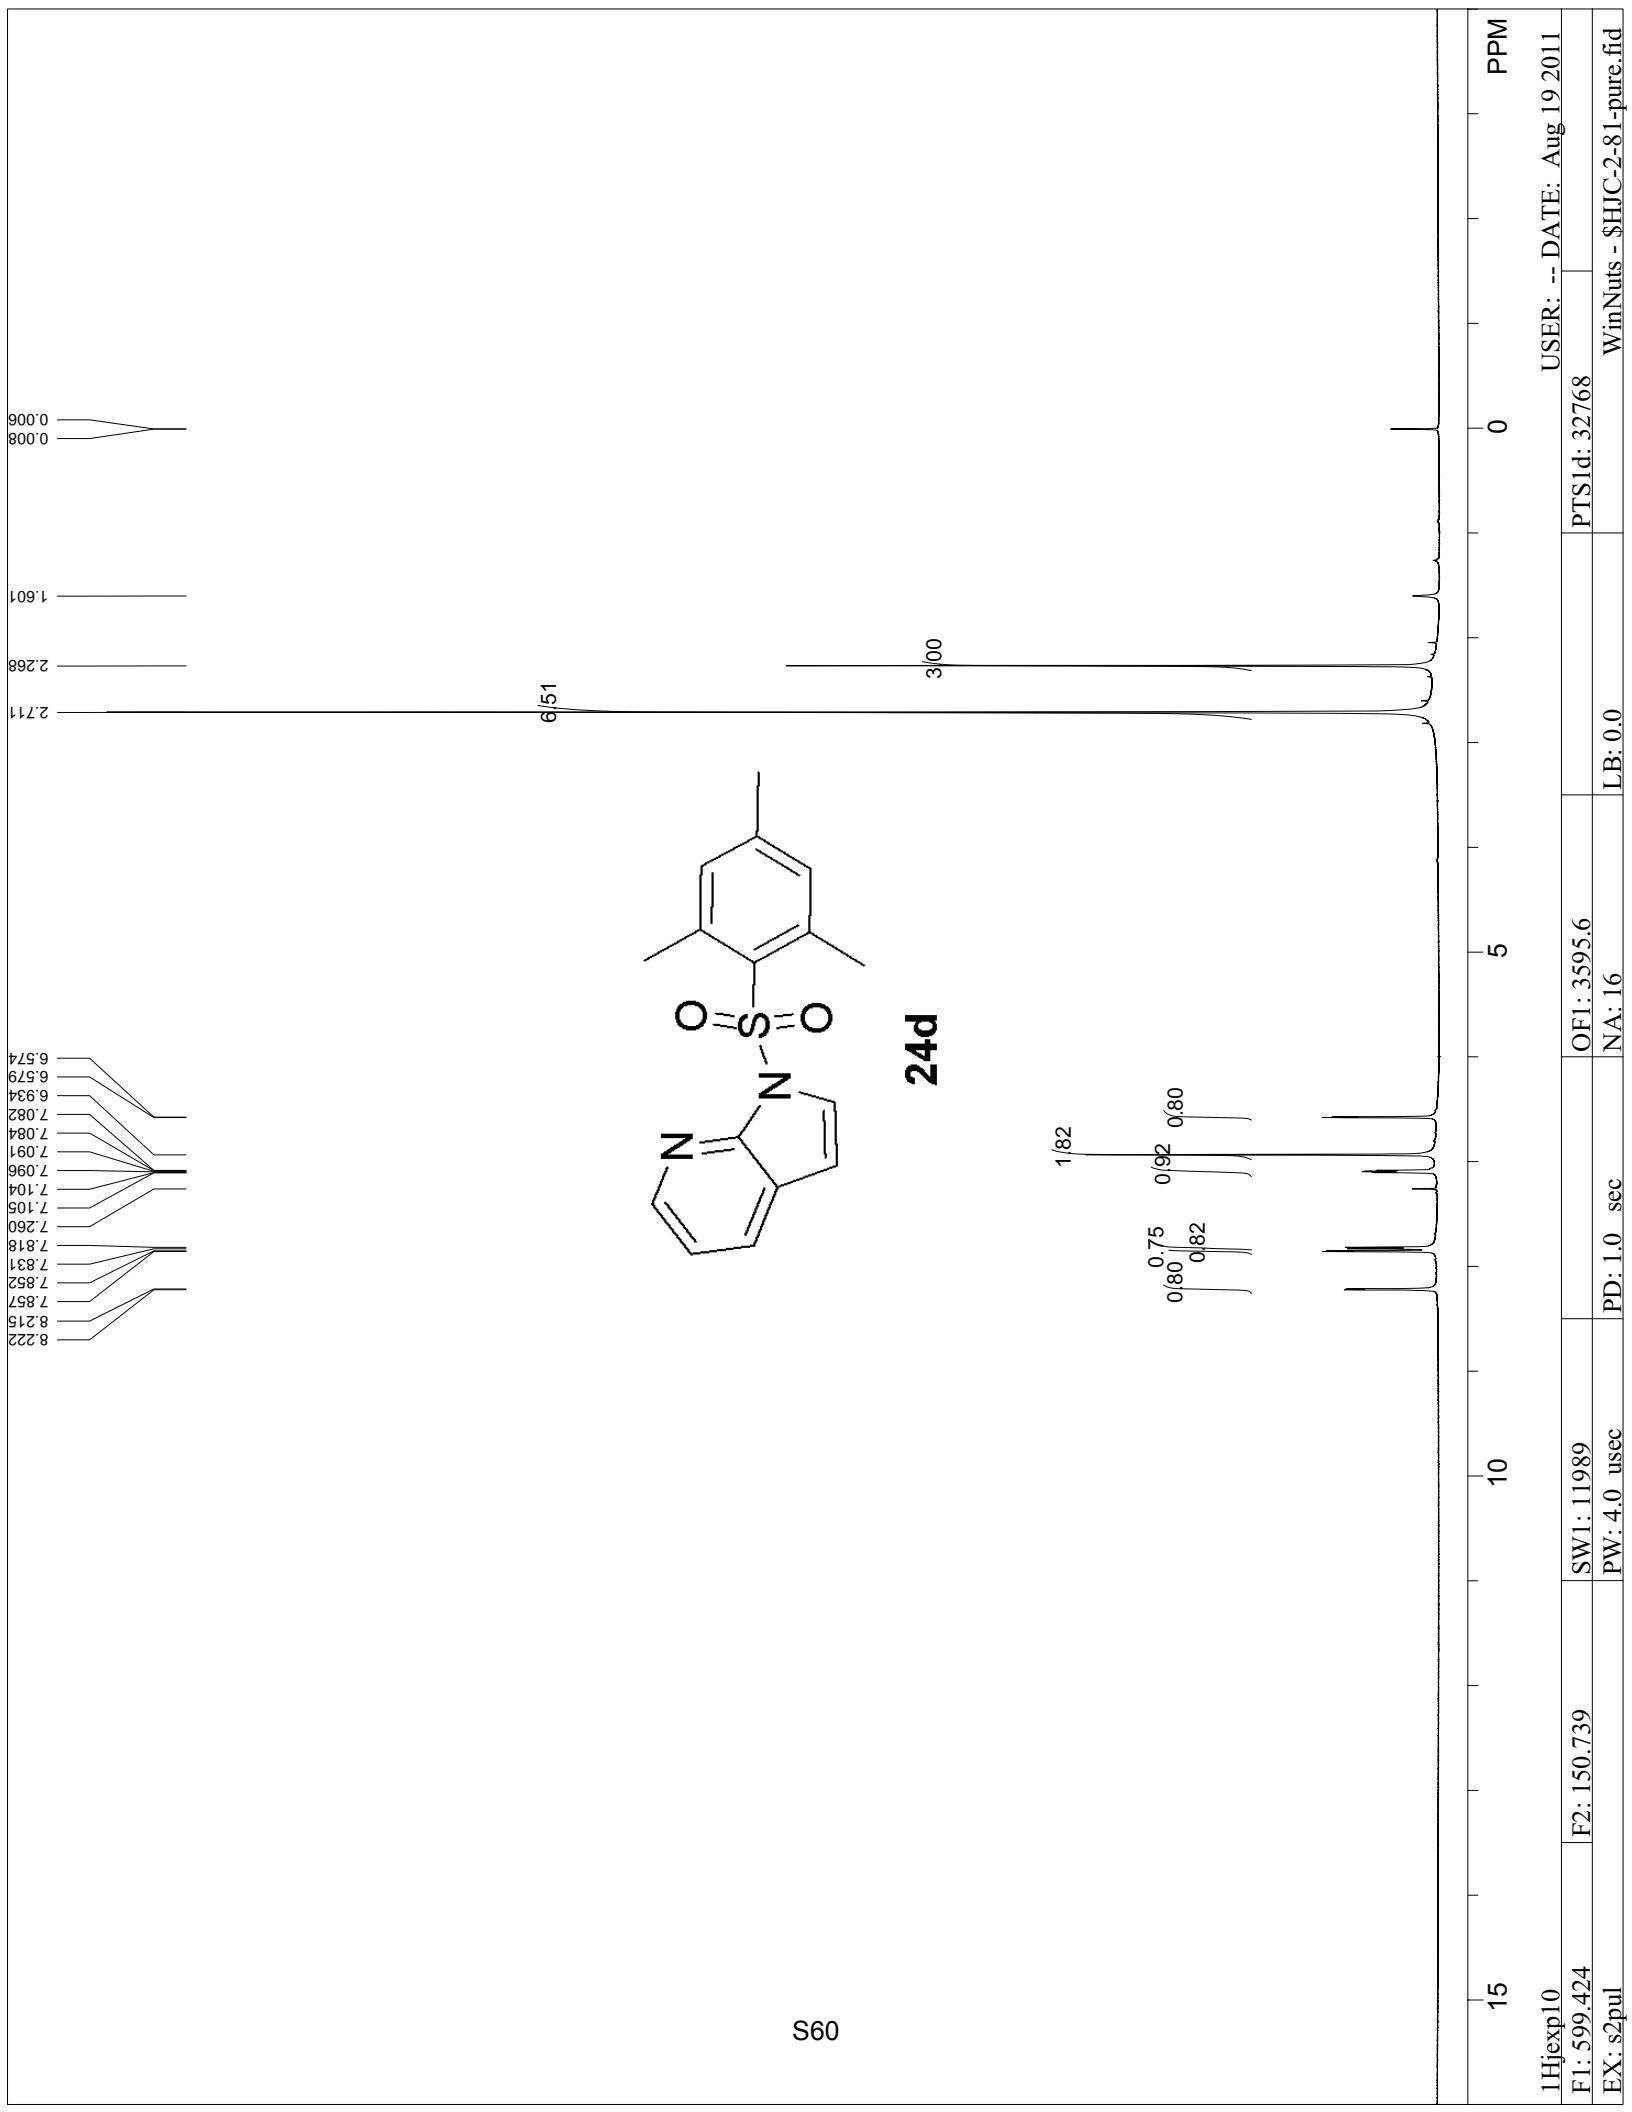

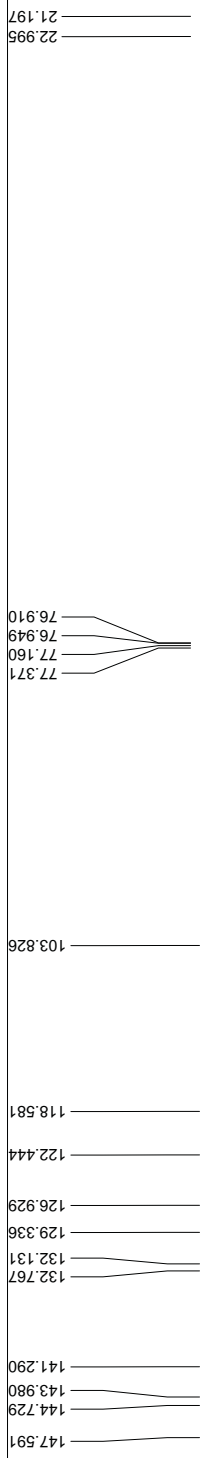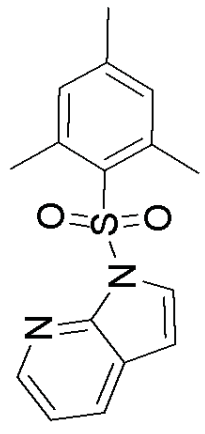

24d

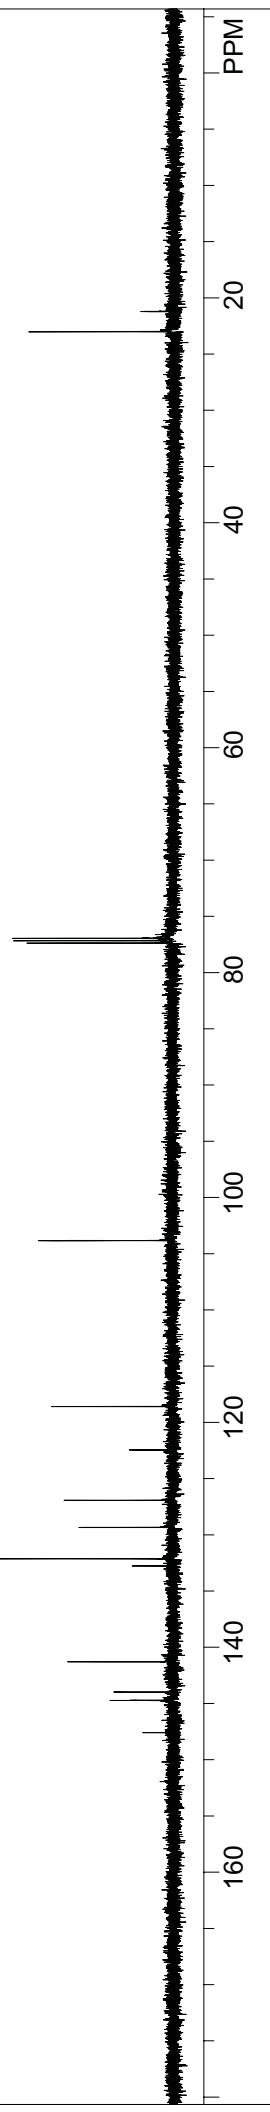

|             |              |                                  |
|-------------|--------------|----------------------------------|
| Std carbon  | USER: --     | DATE: Aug 19 2011                |
| F1: 150.738 | PTS1d: 32768 |                                  |
| EX: s2pul   | LB: 0.0      | WinNuts - \$HIC-2-81C-pure-2.fid |
|             | OF1: 13306.0 |                                  |
|             | NA: 512      |                                  |
|             | PD: 1.0 sec  |                                  |
|             | SW1: 29996   |                                  |
|             | PW: 8.0 usec |                                  |
